# Supplementary material for: DFT/TD-DFT Framework of Mixed-Metal Complexes with Symmetrical and Unsymmetrical Bridging Ligands—Step-By-Step Investigations: Mononuclear, Dinuclear Homometallic, and Heterometallic for Optoelectronic Applications
Source: MDPI journal article supplement (doi:10.3390/ma14247783), 2021-12-16
Supplement: s1 [file s1]

**Table S1.** The  $\alpha$ -HOSO,  $\beta$ -HOSO,  $\alpha$ -LUSO,  $\beta$ -LUSO contours for the complexes **1a**ox-**6a**ox and **1b**ox-**6b**ox.

| 1aox                                                                                |                                                                                     | 1box                                                                                 |                                                                                       |
|-------------------------------------------------------------------------------------|-------------------------------------------------------------------------------------|--------------------------------------------------------------------------------------|---------------------------------------------------------------------------------------|
| 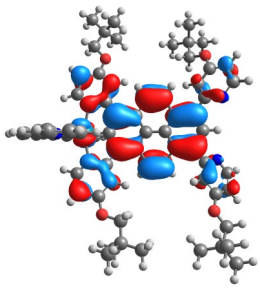   |    |    |    |
| $\alpha$ -HOSO                                                                      | $\beta$ -HOSO                                                                       | $\alpha$ -HOSO                                                                       | $\beta$ -HOSO                                                                         |
|    |    |    |    |
| $\alpha$ -LUSO                                                                      | $\beta$ -LUSO                                                                       | $\alpha$ -LUSO                                                                       | $\beta$ -LUSO                                                                         |
| 2aox                                                                                |                                                                                     | 2box                                                                                 |                                                                                       |
|  |  |  |  |
| $\alpha$ -HOSO                                                                      | $\beta$ -HOSO                                                                       | $\alpha$ -HOSO                                                                       | $\beta$ -HOSO                                                                         |
|  |  |  |  |
| $\alpha$ -LUSO                                                                      | $\beta$ -LUSO                                                                       | $\alpha$ -LUSO                                                                       | $\beta$ -LUSO                                                                         |
| 3aox                                                                                |                                                                                     | 3box                                                                                 |                                                                                       |
|  |  |  |  |
| $\alpha$ -HOSO                                                                      | $\beta$ -HOSO                                                                       | $\alpha$ -HOSO                                                                       | $\beta$ -HOSO                                                                         |

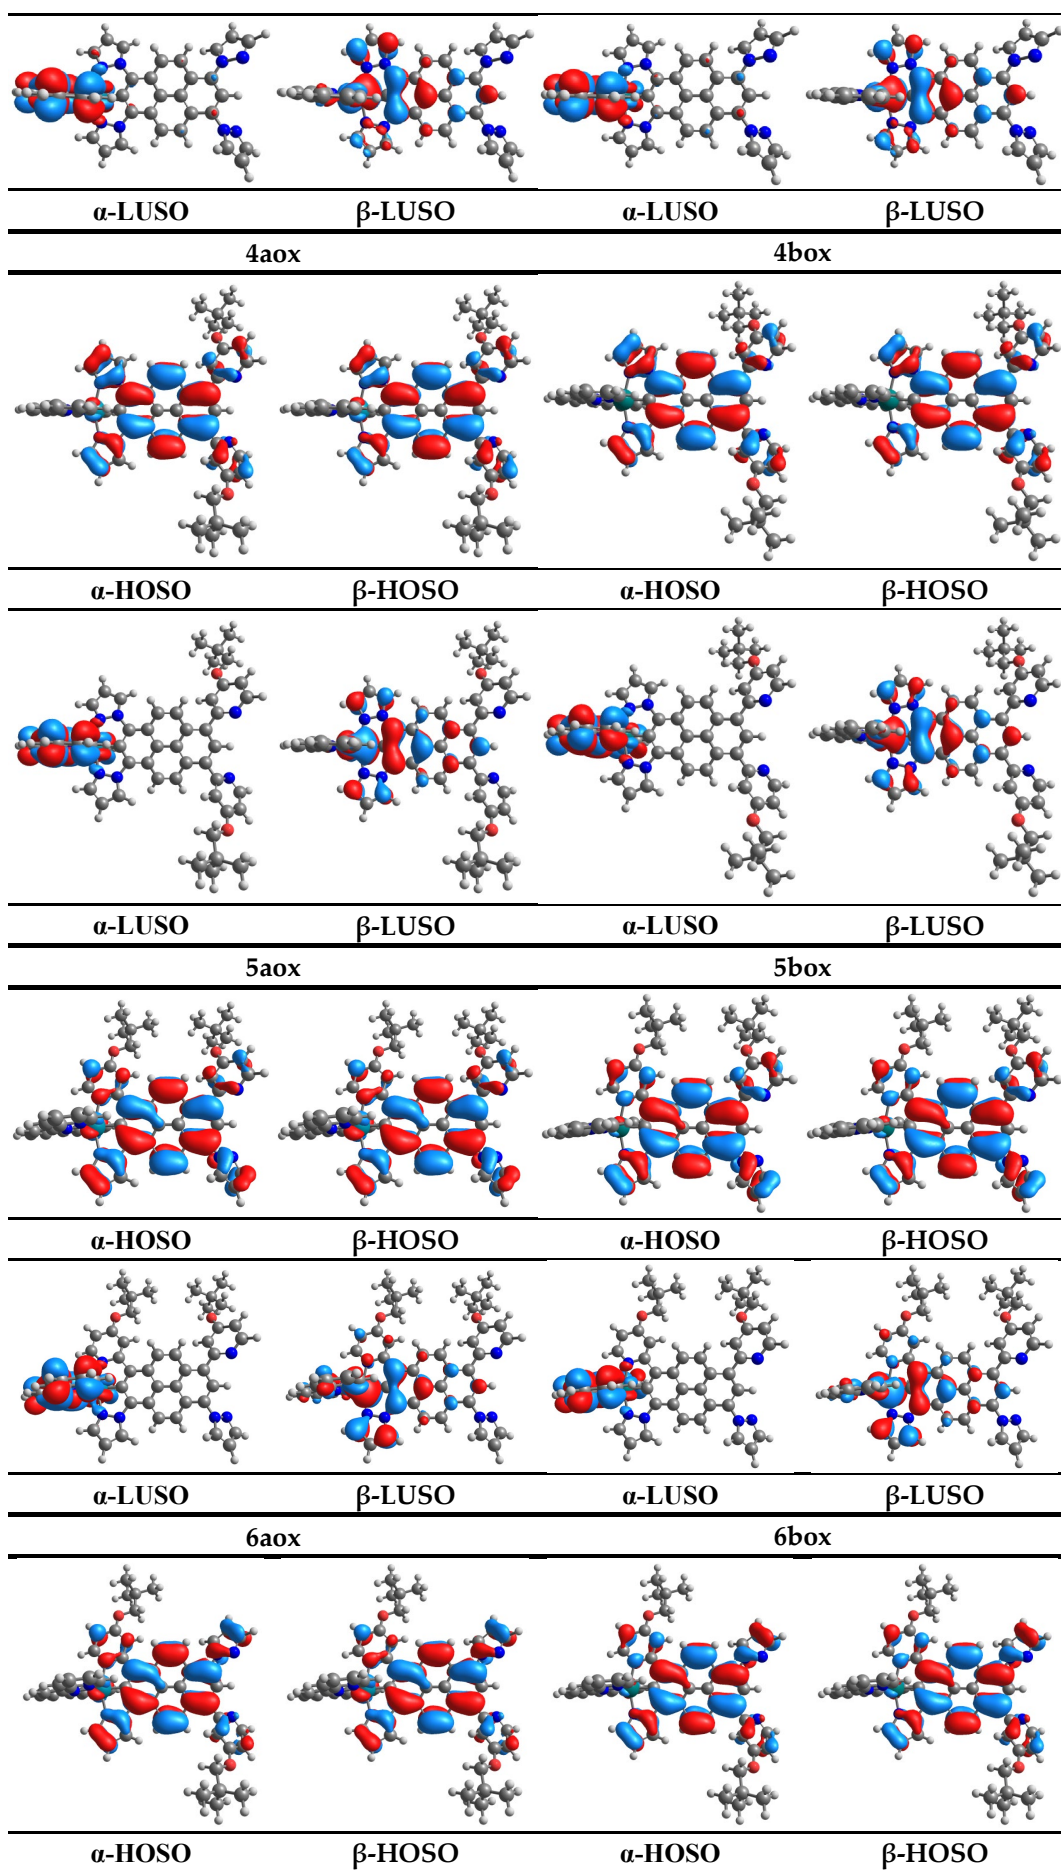

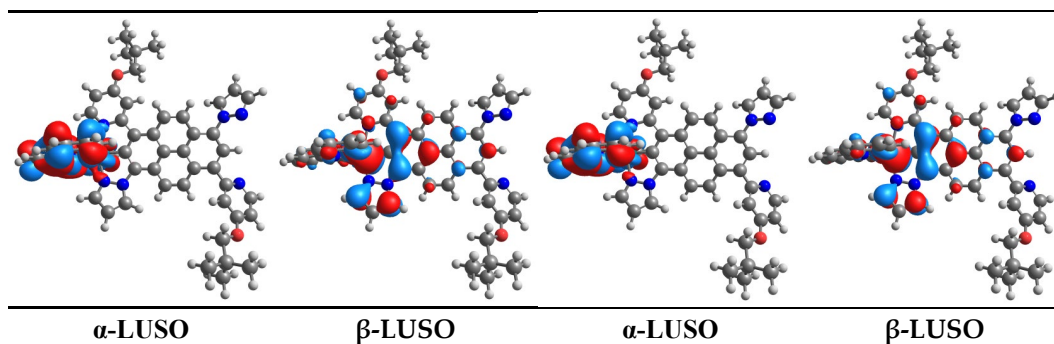

Cartesian coordinates of DFT-optimized structure of **1a** complex by B3LYP/Def2-TZVP; 6-31G(d,p)/CH<sub>3</sub>CN, charge = 1, multiplicity = 1

|    |              |              |              |
|----|--------------|--------------|--------------|
| Os | 2.222519000  | -0.045200000 | 0.045462000  |
| N  | -7.923901000 | 2.604759000  | -1.745530000 |
| N  | 1.667812000  | -2.059780000 | 0.320821000  |
| N  | 2.612038000  | 0.262951000  | 2.081448000  |
| N  | 4.263912000  | -0.153684000 | 0.122264000  |
| N  | 2.728491000  | -0.396500000 | -1.957588000 |
| N  | -8.215371000 | -1.502655000 | 1.406863000  |
| N  | 1.902279000  | 2.017318000  | -0.266390000 |
| C  | 1.701868000  | 0.471849000  | 3.061826000  |
| H  | 0.667278000  | 0.471661000  | 2.741752000  |
| C  | 2.052347000  | 0.672925000  | 4.389151000  |
| H  | 1.274342000  | 0.836128000  | 5.126834000  |
| C  | 3.403614000  | 0.660994000  | 4.743736000  |
| H  | 3.711972000  | 0.815661000  | 5.772314000  |
| C  | 4.351923000  | 0.445361000  | 3.750452000  |
| H  | 5.406925000  | 0.430143000  | 3.998207000  |
| C  | 3.950713000  | 0.247231000  | 2.426146000  |
| C  | 4.891047000  | 0.007968000  | 1.321528000  |
| C  | 6.283388000  | -0.068680000 | 1.394521000  |
| H  | 6.798435000  | 0.056546000  | 2.340004000  |
| C  | 7.011135000  | -0.311704000 | 0.227161000  |
| C  | 6.351052000  | -0.474751000 | -0.993202000 |
| H  | 6.918856000  | -0.662741000 | -1.897106000 |
| C  | 4.957779000  | -0.390521000 | -1.026823000 |
| C  | 4.083075000  | -0.526437000 | -2.200846000 |
| C  | 4.558925000  | -0.767626000 | -3.492963000 |
| H  | 5.625060000  | -0.866015000 | -3.661426000 |
| C  | 3.669999000  | -0.880253000 | -4.555801000 |
| H  | 4.036131000  | -1.067713000 | -5.559670000 |
| C  | 2.302457000  | -0.746721000 | -4.303180000 |
| H  | 1.569079000  | -0.826296000 | -5.098135000 |
| C  | 1.876936000  | -0.508051000 | -3.004344000 |
| H  | 0.826965000  | -0.397706000 | -2.762477000 |
| C  | -8.652843000 | 3.688701000  | -2.055743000 |
| C  | 2.526980000  | -3.102550000 | 0.398649000  |
| H  | -9.518989000 | 3.514139000  | -2.691938000 |

|   |              |              |              |
|---|--------------|--------------|--------------|
| H | 3.578769000  | -2.844569000 | 0.438798000  |
| C | -8.369245000 | 4.976570000  | -1.623889000 |
| C | 2.131053000  | -4.422720000 | 0.416921000  |
| H | -8.991342000 | 5.820244000  | -1.902727000 |
| H | 2.858660000  | -5.223289000 | 0.480485000  |
| C | -7.252175000 | 5.167078000  | -0.795635000 |
| C | 0.758929000  | -4.710437000 | 0.315428000  |
| C | -6.476531000 | 4.050717000  | -0.460196000 |
| C | -0.144703000 | -3.647245000 | 0.243872000  |
| H | -5.621064000 | 4.137162000  | 0.196279000  |
| H | -1.197933000 | -3.839558000 | 0.115118000  |
| C | -6.842338000 | 2.791659000  | -0.965122000 |
| C | 0.307257000  | -2.317744000 | 0.287256000  |
| C | -6.085145000 | 1.563532000  | -0.581807000 |
| C | -0.532961000 | -1.115112000 | 0.197256000  |
| C | -6.829429000 | 0.457019000  | -0.169377000 |
| C | 0.232586000  | 0.057109000  | -0.024768000 |
| C | -6.235618000 | -0.730529000 | 0.261423000  |
| C | -0.392120000 | 1.300205000  | -0.292301000 |
| C | -7.148943000 | -1.846413000 | 0.646585000  |
| C | 0.569229000  | 2.412194000  | -0.327905000 |
| C | -6.953134000 | -3.148719000 | 0.181762000  |
| C | 0.264615000  | 3.774852000  | -0.319912000 |
| H | -6.116651000 | -3.399935000 | -0.460567000 |
| H | -0.760033000 | 4.113909000  | -0.271633000 |
| C | -7.872974000 | -4.152073000 | 0.525375000  |
| C | 1.272275000  | 4.747254000  | -0.330688000 |
| C | -8.968239000 | -3.803952000 | 1.325718000  |
| C | 2.610355000  | 4.327396000  | -0.334975000 |
| H | -9.717391000 | -4.523793000 | 1.630136000  |
| H | 3.442241000  | 5.018884000  | -0.350113000 |
| C | -9.079870000 | -2.470625000 | 1.722279000  |
| C | 2.859719000  | 2.964480000  | -0.286486000 |
| H | -9.926991000 | -2.171561000 | 2.338023000  |
| H | 3.880968000  | 2.602736000  | -0.251611000 |
| C | -4.819916000 | -0.815947000 | 0.323182000  |
| C | -1.797753000 | 1.347960000  | -0.490845000 |
| C | -4.022789000 | 0.287690000  | -0.131561000 |
| C | -2.586841000 | 0.205605000  | -0.103789000 |
| C | -4.669155000 | 1.476857000  | -0.608767000 |
| C | -1.946380000 | -1.014789000 | 0.316695000  |
| C | -3.844509000 | 2.506757000  | -1.166372000 |
| C | -2.779228000 | -2.030428000 | 0.891953000  |
| H | -4.314768000 | 3.343236000  | -1.670481000 |
| H | -2.317733000 | -2.872840000 | 1.391787000  |
| C | -2.484573000 | 2.446014000  | -1.105819000 |
| C | -4.139153000 | -1.935948000 | 0.899602000  |
| H | -1.909377000 | 3.225428000  | -1.589263000 |
| H | -4.720279000 | -2.715022000 | 1.379232000  |
| O | -7.017993000 | 6.428189000  | -0.372629000 |
| O | 0.861438000  | 6.030602000  | -0.327149000 |

|   |               |              |              |
|---|---------------|--------------|--------------|
| O | 0.422782000   | -6.014534000 | 0.286245000  |
| O | -7.624863000  | -5.387185000 | 0.038387000  |
| C | -8.547806000  | -6.450485000 | 0.332599000  |
| C | -8.060751000  | -7.743604000 | -0.337262000 |
| C | -9.083192000  | -8.844530000 | 0.005908000  |
| C | -6.674920000  | -8.133350000 | 0.210759000  |
| C | -7.993188000  | -7.555049000 | -1.864595000 |
| C | -0.961378000  | -6.390623000 | 0.172687000  |
| C | -1.068198000  | -7.922535000 | 0.194366000  |
| C | -2.562778000  | -8.273874000 | 0.062430000  |
| C | -0.286330000  | -8.524314000 | -0.988704000 |
| C | -0.520746000  | -8.471203000 | 1.525808000  |
| C | -5.885768000  | 6.686539000  | 0.474974000  |
| C | -5.851724000  | 8.180235000  | 0.831336000  |
| C | -5.719779000  | 9.027905000  | -0.448145000 |
| C | -7.132236000  | 8.568857000  | 1.594740000  |
| C | -4.621646000  | 8.403449000  | 1.732402000  |
| C | 1.844470000   | 7.082565000  | -0.317099000 |
| C | 1.128925000   | 8.441202000  | -0.307053000 |
| C | 0.252316000   | 8.568495000  | 0.953352000  |
| C | 0.263270000   | 8.592631000  | -1.572296000 |
| C | 2.221614000   | 9.528060000  | -0.291715000 |
| H | -9.542920000  | -6.176394000 | -0.041857000 |
| H | -8.609508000  | -6.582482000 | 1.420910000  |
| H | -10.083244000 | -8.594351000 | -0.368821000 |
| H | -9.155386000  | -9.000404000 | 1.089243000  |
| H | -8.783072000  | -9.794882000 | -0.449866000 |
| H | -6.706995000  | -8.280826000 | 1.297457000  |
| H | -5.931237000  | -7.359441000 | -0.004794000 |
| H | -6.333222000  | -9.069732000 | -0.245375000 |
| H | -8.976044000  | -7.289357000 | -2.273417000 |
| H | -7.666816000  | -8.482157000 | -2.350064000 |
| H | -7.288156000  | -6.762701000 | -2.135724000 |
| H | -1.521753000  | -5.954447000 | 1.009966000  |
| H | -1.365461000  | -5.990273000 | -0.766283000 |
| H | -2.698017000  | -9.361301000 | 0.073228000  |
| H | -2.982500000  | -7.893339000 | -0.876758000 |
| H | -3.147716000  | -7.855234000 | 0.890420000  |
| H | -0.671162000  | -8.152387000 | -1.946406000 |
| H | -0.378585000  | -9.616583000 | -0.990917000 |
| H | 0.777585000   | -8.273455000 | -0.929493000 |
| H | -1.074271000  | -8.060309000 | 2.379286000  |
| H | 0.536897000   | -8.219527000 | 1.654190000  |
| H | -0.616783000  | -9.562671000 | 1.557264000  |
| H | -4.967910000  | 6.395461000  | -0.053100000 |
| H | -5.970822000  | 6.079736000  | 1.385910000  |
| H | -4.803768000  | 8.775028000  | -0.996438000 |
| H | -5.677219000  | 10.094286000 | -0.197472000 |
| H | -6.571173000  | 8.869941000  | -1.117780000 |
| H | -8.024306000  | 8.405436000  | 0.981690000  |
| H | -7.102252000  | 9.627617000  | 1.877161000  |

|   |              |              |              |
|---|--------------|--------------|--------------|
| H | -7.238461000 | 7.978905000  | 2.513704000  |
| H | -3.691501000 | 8.138482000  | 1.214648000  |
| H | -4.682557000 | 7.804740000  | 2.649464000  |
| H | -4.553106000 | 9.457366000  | 2.024908000  |
| H | 2.478202000  | 6.988770000  | -1.208544000 |
| H | 2.475498000  | 6.973375000  | 0.574587000  |
| H | -0.237964000 | 9.548497000  | 0.978713000  |
| H | 0.854467000  | 8.470015000  | 1.865125000  |
| H | -0.525893000 | 7.798595000  | 0.975536000  |
| H | -0.508742000 | 7.817921000  | -1.619910000 |
| H | 0.874602000  | 8.520262000  | -2.480396000 |
| H | -0.234049000 | 9.569443000  | -1.579283000 |
| H | 2.856623000  | 9.446301000  | 0.598826000  |
| H | 1.763316000  | 10.523434000 | -0.285803000 |
| H | 2.866172000  | 9.461557000  | -1.176638000 |
| H | -7.910793000 | 0.525033000  | -0.179303000 |
| H | 8.093165000  | -0.374223000 | 0.268404000  |

Cartesian coordinates of DFT-optimized structure of **2a** complex by B3LYP/Def2-TZVP; 6-31G(d,p)/CH<sub>3</sub>CN, charge = 1, multiplicity = 1

|    |             |              |              |
|----|-------------|--------------|--------------|
| Os | 2.194111000 | -0.984051000 | 0.014047000  |
| N  | 0.972237000 | -2.694704000 | 0.186749000  |
| N  | 2.685401000 | -0.969422000 | 2.051781000  |
| N  | 4.074634000 | -1.793636000 | 0.018704000  |
| N  | 2.528390000 | -1.357594000 | -2.021623000 |
| N  | 2.614902000 | 1.075718000  | -0.163155000 |
| C  | 1.910069000 | -0.533002000 | 3.072415000  |
| H  | 0.935690000 | -0.155757000 | 2.787609000  |
| C  | 2.318518000 | -0.561055000 | 4.398165000  |
| H  | 1.649531000 | -0.195749000 | 5.169593000  |
| C  | 3.586111000 | -1.059963000 | 4.707510000  |
| H  | 3.936624000 | -1.095356000 | 5.733583000  |
| C  | 4.395037000 | -1.514201000 | 3.672230000  |
| H  | 5.382145000 | -1.908115000 | 3.884659000  |
| C  | 3.939691000 | -1.466718000 | 2.351508000  |
| C  | 4.731576000 | -1.933928000 | 1.204067000  |
| C  | 6.017433000 | -2.477713000 | 1.226910000  |
| H  | 6.554712000 | -2.595890000 | 2.160741000  |
| C  | 6.608220000 | -2.871791000 | 0.023971000  |
| C  | 5.919118000 | -2.720488000 | -1.181713000 |
| H  | 6.380547000 | -3.026036000 | -2.113630000 |
| C  | 4.635695000 | -2.170798000 | -1.164145000 |
| C  | 3.754820000 | -1.923510000 | -2.315251000 |
| C  | 4.107414000 | -2.226301000 | -3.633442000 |
| H  | 5.074601000 | -2.669318000 | -3.840761000 |
| C  | 3.222666000 | -1.961177000 | -4.672399000 |
| H  | 3.493119000 | -2.195597000 | -5.696533000 |
| C  | 1.985030000 | -1.388898000 | -4.369105000 |
| H  | 1.260323000 | -1.162592000 | -5.143478000 |

|   |              |              |              |
|---|--------------|--------------|--------------|
| C | 1.679488000  | -1.105061000 | -3.045648000 |
| H | 0.732954000  | -0.659525000 | -2.765676000 |
| C | 1.412485000  | -3.974607000 | 0.182949000  |
| H | 2.488229000  | -4.102795000 | 0.213334000  |
| C | 0.579633000  | -5.072191000 | 0.133266000  |
| H | 0.981793000  | -6.078502000 | 0.132446000  |
| C | -0.806794000 | -4.856485000 | 0.049343000  |
| C | -1.280941000 | -3.542146000 | 0.063312000  |
| H | -2.335213000 | -3.347199000 | -0.050678000 |
| C | -0.392329000 | -2.460157000 | 0.172263000  |
| C | -5.033445000 | 3.405545000  | -0.406461000 |
| C | -0.760035000 | -1.036775000 | 0.172991000  |
| C | -6.131938000 | 2.622423000  | -0.066631000 |
| C | 0.366398000  | -0.192134000 | 0.005334000  |
| C | -5.958282000 | 1.289266000  | 0.289434000  |
| C | 0.214654000  | 1.205771000  | -0.174731000 |
| C | 1.503999000  | 1.913415000  | -0.164085000 |
| C | 1.692401000  | 3.292435000  | -0.059559000 |
| H | 0.850290000  | 3.962196000  | 0.039342000  |
| C | 2.976187000  | 3.852137000  | -0.033756000 |
| C | 4.083533000  | 2.994391000  | -0.103143000 |
| H | 5.104214000  | 3.353029000  | -0.096624000 |
| C | 3.842599000  | 1.629866000  | -0.149061000 |
| H | 4.673611000  | 0.933990000  | -0.164868000 |
| C | -4.669826000 | 0.711554000  | 0.361663000  |
| C | -1.084232000 | 1.750932000  | -0.348652000 |
| C | -3.539494000 | 1.500451000  | -0.034626000 |
| C | -2.222111000 | 0.929269000  | -0.020032000 |
| C | -3.729382000 | 2.861285000  | -0.445961000 |
| C | -2.049554000 | -0.459761000 | 0.322547000  |
| C | -2.597428000 | 3.584461000  | -0.938922000 |
| C | -3.186843000 | -1.155667000 | 0.851764000  |
| H | -2.745228000 | 4.559921000  | -1.387578000 |
| H | -3.047402000 | -2.129390000 | 1.303871000  |
| C | -1.343327000 | 3.054236000  | -0.889054000 |
| C | -4.432401000 | -0.603076000 | 0.873007000  |
| H | -0.527829000 | 3.616083000  | -1.326012000 |
| H | -5.253221000 | -1.157465000 | 1.313107000  |
| O | 3.038585000  | 5.193738000  | 0.067674000  |
| O | -1.580164000 | -5.955000000 | -0.048006000 |
| C | -3.009914000 | -5.810686000 | -0.132957000 |
| C | -3.652896000 | -7.202613000 | -0.220550000 |
| C | -5.177113000 | -6.991502000 | -0.308826000 |
| C | -3.156082000 | -7.935242000 | -1.481258000 |
| C | -3.313688000 | -8.022833000 | 1.038491000  |
| C | 4.326298000  | 5.836930000  | 0.111325000  |
| C | 4.127354000  | 7.352550000  | 0.256833000  |
| C | 3.385271000  | 7.664457000  | 1.570177000  |
| C | 3.333226000  | 7.900010000  | -0.944328000 |
| C | 5.529646000  | 7.991550000  | 0.287588000  |
| H | -3.368156000 | -5.275371000 | 0.756256000  |

|   |              |              |              |
|---|--------------|--------------|--------------|
| H | -3.258470000 | -5.218234000 | -1.022970000 |
| H | -5.689174000 | -7.958014000 | -0.375908000 |
| H | -5.450188000 | -6.405996000 | -1.195224000 |
| H | -5.561691000 | -6.469332000 | 0.575733000  |
| H | -3.400595000 | -7.369296000 | -2.388763000 |
| H | -3.630168000 | -8.920241000 | -1.561572000 |
| H | -2.071502000 | -8.081228000 | -1.453953000 |
| H | -3.673262000 | -7.521464000 | 1.945649000  |
| H | -2.233394000 | -8.169812000 | 1.137423000  |
| H | -3.787676000 | -9.010025000 | 0.990077000  |
| H | 4.871457000  | 5.607595000  | -0.813418000 |
| H | 4.895866000  | 5.440746000  | 0.961907000  |
| H | 3.258018000  | 8.746717000  | 1.688932000  |
| H | 3.945949000  | 7.294689000  | 2.437656000  |
| H | 2.392974000  | 7.202336000  | 1.584727000  |
| H | 2.335686000  | 7.452330000  | -0.998275000 |
| H | 3.851447000  | 7.691377000  | -1.888490000 |
| H | 3.214323000  | 8.986345000  | -0.859234000 |
| H | 6.122082000  | 7.617846000  | 1.131670000  |
| H | 5.446757000  | 9.079203000  | 0.392501000  |
| H | 6.084892000  | 7.784935000  | -0.635504000 |
| H | -7.124886000 | 3.051842000  | -0.080035000 |
| H | 7.606159000  | -3.296640000 | 0.026042000  |
| N | -5.275133000 | 4.766286000  | -0.744235000 |
| C | -4.646920000 | 5.882138000  | -0.259725000 |
| C | -5.298619000 | 6.974383000  | -0.791738000 |
| C | -6.327683000 | 6.419695000  | -1.586947000 |
| N | -6.322558000 | 5.088700000  | -1.555557000 |
| N | -7.122546000 | 0.535989000  | 0.607844000  |
| N | -8.092816000 | 1.084360000  | 1.393393000  |
| C | -9.068068000 | 0.178104000  | 1.406924000  |
| C | -8.750700000 | -0.956429000 | 0.625200000  |
| C | -7.495988000 | -0.687931000 | 0.120917000  |
| H | -6.859401000 | -1.242607000 | -0.551927000 |
| H | -9.350694000 | -1.837200000 | 0.448778000  |
| H | -9.964908000 | 0.369106000  | 1.982590000  |
| H | -7.068433000 | 6.935678000  | -2.184651000 |
| H | -5.069228000 | 8.016697000  | -0.624941000 |
| H | -3.819952000 | 5.806086000  | 0.430118000  |

Cartesian coordinates of DFT-optimized structure of **3a** complex by B3LYP/Def2-TZVP; 6-31G(d,p)/CH<sub>3</sub>CN, charge = 1, multiplicity = 1

|   |             |              |              |
|---|-------------|--------------|--------------|
| C | 4.055649000 | 2.468887000  | -0.171154000 |
| C | 5.413802000 | 2.473468000  | -0.258118000 |
| C | 6.168145000 | 1.262223000  | -0.187373000 |
| C | 5.459823000 | 0.023858000  | -0.033253000 |
| C | 4.024677000 | 0.012564000  | 0.043564000  |
| C | 3.300393000 | 1.263663000  | 0.008256000  |
| C | 6.197027000 | -1.206554000 | 0.031828000  |

|   |              |              |              |
|---|--------------|--------------|--------------|
| C | 5.469913000  | -2.437547000 | 0.004991000  |
| C | 4.110294000  | -2.454605000 | 0.040359000  |
| C | 3.333919000  | -1.252940000 | 0.142016000  |
| C | 1.893486000  | 1.202535000  | 0.117337000  |
| C | 1.206712000  | -0.017315000 | 0.198150000  |
| C | 1.929904000  | -1.216672000 | 0.260912000  |
| C | 7.579394000  | 1.234178000  | -0.264935000 |
| C | 8.287532000  | 0.048231000  | -0.114205000 |
| C | 7.608758000  | -1.154884000 | 0.049661000  |
| H | 3.546983000  | 3.414364000  | -0.279246000 |
| H | 5.930946000  | 3.417135000  | -0.381395000 |
| H | 3.612688000  | -3.407906000 | -0.065097000 |
| H | 6.010802000  | -3.371812000 | -0.088486000 |
| N | 0.978508000  | 2.305927000  | 0.130526000  |
| N | -0.370656000 | 1.983264000  | 0.037013000  |
| C | -1.046509000 | 3.132967000  | 0.129734000  |
| C | -0.165222000 | 4.210435000  | 0.304231000  |
| C | 1.098487000  | 3.654321000  | 0.313022000  |
| N | 1.056474000  | -2.339212000 | 0.419233000  |
| N | -0.303037000 | -2.082988000 | 0.294080000  |
| C | -0.932237000 | -3.236015000 | 0.544794000  |
| C | -0.008315000 | -4.244979000 | 0.857350000  |
| C | 1.232551000  | -3.643605000 | 0.783359000  |
| N | 8.331902000  | 2.428010000  | -0.465342000 |
| N | 9.369135000  | 2.724532000  | 0.367722000  |
| C | 9.909402000  | 3.827886000  | -0.147257000 |
| C | 8.236851000  | 3.321237000  | -1.496904000 |
| C | 9.241097000  | 4.249996000  | -1.318964000 |
| N | 8.386184000  | -2.336708000 | 0.200684000  |
| N | 9.470046000  | -2.544577000 | -0.600145000 |
| C | 10.019776000 | -3.666050000 | -0.138956000 |
| C | 9.311532000  | -4.189983000 | 0.966859000  |
| C | 8.271959000  | -3.305551000 | 1.161280000  |
| C | -0.106334000 | -0.261369000 | -2.943151000 |
| C | -0.389315000 | -0.358913000 | -4.298825000 |
| C | -1.722113000 | -0.402451000 | -4.711288000 |
| C | -2.721696000 | -0.346779000 | -3.745605000 |
| C | -2.386696000 | -0.247637000 | -2.393047000 |
| N | -1.065620000 | -0.204725000 | -1.991606000 |
| C | -3.387282000 | -0.185758000 | -1.314617000 |
| N | -2.828776000 | -0.100124000 | -0.078580000 |
| C | -3.580141000 | -0.037334000 | 1.052741000  |
| C | -4.973439000 | -0.057916000 | 0.962285000  |
| C | -5.567678000 | -0.142959000 | -0.298839000 |
| C | -4.777191000 | -0.207603000 | -1.448304000 |
| C | -2.766925000 | 0.051595000  | 2.277720000  |
| N | -1.398551000 | 0.063266000  | 2.091549000  |
| C | -0.603866000 | 0.151444000  | 3.181966000  |
| C | -1.101209000 | 0.224944000  | 4.476246000  |
| C | -2.483086000 | 0.209252000  | 4.672249000  |
| C | -3.315072000 | 0.122992000  | 3.560779000  |

|    |              |              |              |
|----|--------------|--------------|--------------|
| H  | 0.913401000  | -0.226469000 | -2.580300000 |
| H  | 0.426722000  | -0.399926000 | -5.011844000 |
| H  | -1.978958000 | -0.479203000 | -5.762470000 |
| H  | -3.764341000 | -0.381535000 | -4.039087000 |
| H  | -5.590369000 | -0.008125000 | 1.851745000  |
| H  | -5.242136000 | -0.273148000 | -2.424948000 |
| H  | 0.460559000  | 0.161860000  | 2.982366000  |
| H  | -0.410960000 | 0.293079000  | 5.309806000  |
| H  | -2.905692000 | 0.264125000  | 5.669881000  |
| H  | -4.391416000 | 0.110757000  | 3.686530000  |
| Os | -0.788013000 | -0.060325000 | 0.087190000  |
| H  | -2.125584000 | 3.122278000  | 0.079358000  |
| H  | -0.412986000 | 5.254802000  | 0.419033000  |
| H  | 2.048504000  | 4.128815000  | 0.476840000  |
| H  | -2.010878000 | -3.276130000 | 0.500278000  |
| H  | -0.215185000 | -5.272968000 | 1.113656000  |
| H  | 2.204082000  | -4.047089000 | 1.005125000  |
| H  | 10.758828000 | 4.284749000  | 0.344671000  |
| H  | 7.490557000  | 3.208998000  | -2.269432000 |
| H  | 9.461828000  | 5.101539000  | -1.945941000 |
| H  | 10.904421000 | -4.062988000 | -0.620668000 |
| H  | 9.529788000  | -5.077914000 | 1.542021000  |
| H  | 7.488237000  | -3.270732000 | 1.903197000  |
| H  | 9.369519000  | 0.058577000  | -0.133937000 |
| H  | -6.648679000 | -0.158858000 | -0.385770000 |

Cartesian coordinates of DFT-optimized structure of **4a** complex by B3LYP/Def2-TZVP;  
6-31G(d,p)/CH<sub>3</sub>CN, charge = 1, multiplicity = 1

|    |              |              |              |
|----|--------------|--------------|--------------|
| Os | 1.814688000  | -3.093382000 | 0.017988000  |
| N  | -1.564150000 | 6.844250000  | -1.646444000 |
| N  | -0.140932000 | -3.697764000 | 0.458508000  |
| N  | 2.445760000  | -3.203508000 | 2.017880000  |
| N  | 2.853081000  | -4.857221000 | 0.049662000  |
| N  | 1.633874000  | -3.750878000 | -1.967627000 |
| N  | -5.229020000 | 4.778381000  | 1.386036000  |
| N  | 3.301061000  | -1.693293000 | -0.439674000 |
| C  | 2.201069000  | -2.309472000 | 3.002840000  |
| H  | 1.611162000  | -1.448181000 | 2.714397000  |
| C  | 2.664870000  | -2.468435000 | 4.301724000  |
| H  | 2.433958000  | -1.714364000 | 5.046091000  |
| C  | 3.419746000  | -3.599291000 | 4.618091000  |
| H  | 3.797555000  | -3.754924000 | 5.623077000  |
| C  | 3.680547000  | -4.529229000 | 3.617197000  |
| H  | 4.264177000  | -5.415776000 | 3.835846000  |
| C  | 3.191861000  | -4.324903000 | 2.324377000  |
| C  | 3.424617000  | -5.263424000 | 1.214270000  |
| C  | 4.138163000  | -6.463122000 | 1.256000000  |
| H  | 4.601334000  | -6.804541000 | 2.174386000  |
| C  | 4.248850000  | -7.224547000 | 0.090381000  |

|   |              |              |              |
|---|--------------|--------------|--------------|
| C | 3.653621000  | -6.789206000 | -1.095817000 |
| H | 3.742271000  | -7.382579000 | -1.998273000 |
| C | 2.948956000  | -5.583661000 | -1.095625000 |
| C | 2.256231000  | -4.955354000 | -2.232872000 |
| C | 2.213326000  | -5.517540000 | -3.511094000 |
| H | 2.707741000  | -6.463697000 | -3.697903000 |
| C | 1.538820000  | -4.866667000 | -4.538760000 |
| H | 1.503621000  | -5.300634000 | -5.532441000 |
| C | 0.911689000  | -3.650197000 | -4.263758000 |
| H | 0.372351000  | -3.104151000 | -5.029908000 |
| C | 0.981760000  | -3.131638000 | -2.977797000 |
| H | 0.508930000  | -2.191815000 | -2.720308000 |
| C | -1.066196000 | 8.055244000  | -1.943901000 |
| C | -0.829814000 | -4.838054000 | 0.580907000  |
| H | -1.678754000 | 8.674973000  | -2.596667000 |
| C | 0.148079000  | 8.540928000  | -1.480471000 |
| H | 0.506871000  | 9.528125000  | -1.751169000 |
| C | 0.908782000  | 7.722790000  | -0.630594000 |
| C | 0.408645000  | 6.455617000  | -0.306504000 |
| H | 0.940619000  | 5.795873000  | 0.366222000  |
| C | -0.825025000 | 6.053517000  | -0.845330000 |
| N | -1.075347000 | -2.670566000 | 0.469052000  |
| C | -1.428651000 | 4.737056000  | -0.482001000 |
| C | -0.567367000 | -1.348681000 | 0.274692000  |
| C | -2.769683000 | 4.734048000  | -0.096307000 |
| C | 0.802104000  | -1.369383000 | -0.013534000 |
| C | -3.435289000 | 3.574301000  | 0.304199000  |
| C | 1.456971000  | -0.171200000 | -0.321094000 |
| C | -4.883676000 | 3.702593000  | 0.639970000  |
| N | 2.861025000  | -0.377340000 | -0.492318000 |
| C | -5.831465000 | 2.807291000  | 0.139655000  |
| H | -5.543965000 | 1.973627000  | -0.490940000 |
| C | -7.190440000 | 3.002176000  | 0.430983000  |
| C | -7.550655000 | 4.105712000  | 1.214490000  |
| H | -8.578681000 | 4.321043000  | 1.477096000  |
| C | -6.527306000 | 4.948876000  | 1.650016000  |
| C | 4.634176000  | -1.652028000 | -0.544345000 |
| H | -6.780712000 | 5.818690000  | 2.254484000  |
| C | -2.718579000 | 2.351370000  | 0.371683000  |
| C | 0.758696000  | 1.046401000  | -0.463067000 |
| C | -1.350372000 | 2.306838000  | -0.063935000 |
| C | -0.624259000 | 1.065714000  | -0.048059000 |
| C | -0.713444000 | 3.512258000  | -0.516100000 |
| C | -1.289599000 | -0.141411000 | 0.382417000  |
| C | 0.608866000  | 3.411058000  | -1.057341000 |
| C | -2.608199000 | -0.022706000 | 0.931075000  |
| H | 1.054285000  | 4.280510000  | -1.526344000 |
| H | -3.065019000 | -0.874277000 | 1.418002000  |
| C | 1.307236000  | 2.242636000  | -1.030211000 |
| C | -3.284448000 | 1.159045000  | 0.928246000  |
| H | 2.277279000  | 2.213097000  | -1.508585000 |

|   |               |              |              |
|---|---------------|--------------|--------------|
| H | -4.266430000  | 1.205322000  | 1.383955000  |
| O | 2.073747000   | 8.235585000  | -0.179117000 |
| O | -8.050120000  | 2.098205000  | -0.086640000 |
| C | -9.459541000  | 2.260765000  | 0.147996000  |
| C | -10.221320000 | 1.118884000  | -0.540721000 |
| C | -11.721318000 | 1.344598000  | -0.268379000 |
| C | -9.784954000  | -0.237087000 | 0.045901000  |
| C | -9.960246000  | 1.148474000  | -2.058592000 |
| C | 2.899630000   | 7.446301000  | 0.693697000  |
| C | 4.156265000   | 8.249082000  | 1.061828000  |
| C | 4.958761000   | 8.588748000  | -0.208494000 |
| C | 3.760014000   | 9.541990000  | 1.799704000  |
| C | 5.006273000   | 7.360579000  | 1.990839000  |
| H | -9.780351000  | 3.231840000  | -0.251635000 |
| H | -9.648539000  | 2.249639000  | 1.229514000  |
| H | -12.062186000 | 2.304531000  | -0.675260000 |
| H | -11.940524000 | 1.333630000  | 0.806230000  |
| H | -12.314555000 | 0.552281000  | -0.738999000 |
| H | -9.978115000  | -0.281031000 | 1.125013000  |
| H | -8.716564000  | -0.413379000 | -0.115003000 |
| H | -10.339928000 | -1.055047000 | -0.428101000 |
| H | -10.273488000 | 2.105490000  | -2.494165000 |
| H | -10.523499000 | 0.351710000  | -2.558234000 |
| H | -8.898095000  | 1.005287000  | -2.281448000 |
| H | 3.175745000   | 6.514402000  | 0.182617000  |
| H | 2.329941000   | 7.192342000  | 1.597276000  |
| H | 5.259759000   | 7.677770000  | -0.740703000 |
| H | 5.868612000   | 9.142075000  | 0.051543000  |
| H | 4.370982000   | 9.205050000  | -0.896252000 |
| H | 3.138844000   | 10.184791000 | 1.167757000  |
| H | 4.654182000   | 10.107909000 | 2.085851000  |
| H | 3.197131000   | 9.318000000  | 2.714447000  |
| H | 5.305736000   | 6.430564000  | 1.492257000  |
| H | 4.458922000   | 7.096013000  | 2.903874000  |
| H | 5.918758000   | 7.889091000  | 2.289330000  |
| H | -3.316810000  | 5.669344000  | -0.107520000 |
| H | 4.799882000   | -8.158638000 | 0.106314000  |
| C | 3.939626000   | 0.452197000  | -0.596811000 |
| C | 5.080668000   | -0.325426000 | -0.645385000 |
| C | -2.327608000  | -3.204271000 | 0.565148000  |
| C | -2.207141000  | -4.578007000 | 0.651275000  |
| H | -0.301833000  | -5.780415000 | 0.599223000  |
| H | 5.199069000   | -2.572758000 | -0.527824000 |
| H | 3.833603000   | 1.522599000  | -0.593764000 |
| H | 6.098631000   | 0.023026000  | -0.732786000 |
| H | -3.209429000  | -2.589292000 | 0.530120000  |
| H | -3.009755000  | -5.294072000 | 0.742864000  |

Cartesian coordinates of DFT-optimized structure of **5a** complex by B3LYP/Def2-TZVP;  
6-31G(d,p)/CH<sub>3</sub>CN, charge = 1, multiplicity = 1

|    |              |              |              |
|----|--------------|--------------|--------------|
| Os | 1.911837000  | -3.000474000 | 0.005771000  |
| N  | -0.062718000 | -3.671240000 | 0.306657000  |
| N  | 2.425574000  | -3.168181000 | 2.033689000  |
| N  | 2.989017000  | -4.741584000 | 0.041192000  |
| N  | 1.855923000  | -3.602618000 | -2.003244000 |
| N  | -5.136897000 | 4.854166000  | 1.419563000  |
| C  | 2.092101000  | -2.318596000 | 3.032667000  |
| H  | 1.496055000  | -1.464163000 | 2.736916000  |
| C  | 2.477603000  | -2.513080000 | 4.351759000  |
| H  | 2.178019000  | -1.793811000 | 5.106047000  |
| C  | 3.244989000  | -3.633752000 | 4.675781000  |
| H  | 3.563463000  | -3.815909000 | 5.696702000  |
| C  | 3.595487000  | -4.518362000 | 3.661750000  |
| H  | 4.189684000  | -5.396565000 | 3.886270000  |
| C  | 3.183216000  | -4.280328000 | 2.347913000  |
| C  | 3.508737000  | -5.171656000 | 1.223197000  |
| C  | 4.258848000  | -6.348744000 | 1.265246000  |
| H  | 4.682179000  | -6.705712000 | 2.196805000  |
| C  | 4.458825000  | -7.066426000 | 0.083792000  |
| C  | 3.915621000  | -6.609342000 | -1.119169000 |
| H  | 4.073320000  | -7.168703000 | -2.033948000 |
| C  | 3.172903000  | -5.426976000 | -1.120162000 |
| C  | 2.524981000  | -4.781323000 | -2.272779000 |
| C  | 2.564669000  | -5.302107000 | -3.568895000 |
| H  | 3.095465000  | -6.227779000 | -3.758546000 |
| C  | 1.924930000  | -4.637301000 | -4.609383000 |
| H  | 1.953785000  | -5.039080000 | -5.616708000 |
| C  | 1.247436000  | -3.448873000 | -4.329378000 |
| H  | 0.731344000  | -2.894206000 | -5.105279000 |
| C  | 1.236465000  | -2.970135000 | -3.026586000 |
| H  | 0.722812000  | -2.053151000 | -2.765225000 |
| C  | -0.440871000 | -4.968853000 | 0.375460000  |
| H  | 0.365487000  | -5.692243000 | 0.405214000  |
| C  | -1.754638000 | -5.385655000 | 0.394427000  |
| H  | -2.005891000 | -6.438398000 | 0.448190000  |
| C  | -2.765487000 | -4.413356000 | 0.305894000  |
| C  | -2.395819000 | -3.066728000 | 0.249874000  |
| H  | -3.149867000 | -2.305278000 | 0.132814000  |
| C  | -1.043547000 | -2.691067000 | 0.288342000  |
| C  | -1.360763000 | 4.786845000  | -0.460493000 |
| C  | -0.524781000 | -1.315797000 | 0.207510000  |
| C  | -2.695617000 | 4.813395000  | -0.069915000 |
| C  | 0.869790000  | -1.299555000 | -0.018919000 |
| C  | -3.366932000 | 3.649729000  | 0.305849000  |
| C  | 1.531897000  | -0.086690000 | -0.272309000 |
| C  | -4.811444000 | 3.785880000  | 0.654705000  |
| C  | -5.772306000 | 2.907514000  | 0.150299000  |
| H  | -5.499561000 | 2.081451000  | -0.496520000 |
| C  | -7.126621000 | 3.112800000  | 0.458163000  |
| C  | -7.466264000 | 4.206706000  | 1.264166000  |

|   |               |              |              |
|---|---------------|--------------|--------------|
| H | -8.488751000  | 4.428206000  | 1.542718000  |
| C | -6.430099000  | 5.033159000  | 1.701312000  |
| H | -6.668104000  | 5.895834000  | 2.321881000  |
| C | -2.656657000  | 2.419737000  | 0.353355000  |
| C | 0.831941000   | 1.121589000  | -0.440150000 |
| C | -1.285852000  | 2.373034000  | -0.071782000 |
| C | -0.563441000  | 1.131004000  | -0.061775000 |
| C | -0.638579000  | 3.575331000  | -0.512923000 |
| C | -1.230343000  | -0.083706000 | 0.328193000  |
| C | 0.692008000   | 3.486855000  | -1.035269000 |
| C | -2.547693000  | 0.038817000  | 0.879058000  |
| H | 1.140985000   | 4.360523000  | -1.493246000 |
| H | -3.003400000  | -0.818472000 | 1.357707000  |
| C | 1.391618000   | 2.320345000  | -0.994754000 |
| C | -3.225205000  | 1.222085000  | 0.891475000  |
| H | 2.372671000   | 2.290826000  | -1.451001000 |
| H | -4.206474000  | 1.263951000  | 1.349417000  |
| O | -4.032252000  | -4.868703000 | 0.271452000  |
| O | -8.002256000  | 2.228782000  | -0.066512000 |
| C | -9.407192000  | 2.409663000  | 0.183451000  |
| C | -10.196675000 | 1.296518000  | -0.520914000 |
| C | -11.688849000 | 1.545990000  | -0.226597000 |
| C | -9.781523000  | -0.079286000 | 0.033904000  |
| C | -9.950637000  | 1.352227000  | -2.040411000 |
| C | -5.122966000  | -3.933932000 | 0.182501000  |
| C | -6.448280000  | -4.709566000 | 0.162394000  |
| C | -7.580685000  | -3.667905000 | 0.074418000  |
| C | -6.498084000  | -5.637155000 | -1.066476000 |
| C | -6.599737000  | -5.533345000 | 1.455316000  |
| H | -9.714187000  | 3.394319000  | -0.193060000 |
| H | -9.586758000  | 2.378998000  | 1.266122000  |
| H | -12.014803000 | 2.521148000  | -0.608556000 |
| H | -11.895214000 | 1.516281000  | 0.850243000  |
| H | -12.302883000 | 0.775760000  | -0.706694000 |
| H | -9.959591000  | -0.138909000 | 1.114866000  |
| H | -8.720013000  | -0.277159000 | -0.146737000 |
| H | -10.362058000 | -0.875558000 | -0.446331000 |
| H | -10.251963000 | 2.322772000  | -2.453717000 |
| H | -10.532324000 | 0.575049000  | -2.549682000 |
| H | -8.893381000  | 1.195835000  | -2.277341000 |
| H | -5.084889000  | -3.257370000 | 1.046295000  |
| H | -5.012798000  | -3.339761000 | -0.733986000 |
| H | -8.554999000  | -4.169270000 | 0.058248000  |
| H | -7.500140000  | -3.063210000 | -0.837096000 |
| H | -7.568031000  | -2.988683000 | 0.935588000  |
| H | -6.405474000  | -5.064154000 | -1.997443000 |
| H | -7.450860000  | -6.178183000 | -1.098133000 |
| H | -5.689607000  | -6.374786000 | -1.039698000 |
| H | -6.575748000  | -4.886525000 | 2.341109000  |
| H | -5.797482000  | -6.271875000 | 1.551957000  |
| H | -7.556401000  | -6.068438000 | 1.456073000  |

|   |              |              |              |
|---|--------------|--------------|--------------|
| H | -3.223617000 | 5.758814000  | -0.062897000 |
| H | 5.039068000  | -7.982630000 | 0.100369000  |
| N | 2.944990000  | -0.264005000 | -0.374514000 |
| C | 4.010976000  | 0.587912000  | -0.394609000 |
| C | 5.167432000  | -0.168393000 | -0.399585000 |
| C | 4.740678000  | -1.505047000 | -0.359106000 |
| N | 3.404673000  | -1.571249000 | -0.330325000 |
| N | -0.752673000 | 6.022910000  | -0.825118000 |
| C | 0.413354000  | 6.561067000  | -0.352893000 |
| C | 0.535346000  | 7.815230000  | -0.913763000 |
| C | -0.621989000 | 7.958825000  | -1.712425000 |
| N | -1.405480000 | 6.883054000  | -1.656851000 |
| H | 5.320472000  | -2.416253000 | -0.336513000 |
| H | 6.182126000  | 0.199483000  | -0.419950000 |
| H | 3.882333000  | 1.655834000  | -0.368352000 |
| H | 1.035267000  | 6.024421000  | 0.347950000  |
| H | 1.337083000  | 8.523326000  | -0.762712000 |
| H | -0.914143000 | 8.799524000  | -2.329019000 |

Cartesian coordinates of DFT-optimized structure of **6a** complex by B3LYP/Def2-TZVP; 6-31G(d,p)/CH<sub>3</sub>CN, charge = 1, multiplicity = 1

|    |              |              |              |
|----|--------------|--------------|--------------|
| Os | 1.866360000  | -2.493946000 | -0.286779000 |
| N  | -0.057794000 | -3.216416000 | 0.181507000  |
| N  | 2.479813000  | -2.435807000 | 1.718929000  |
| N  | 3.030477000  | -4.171475000 | -0.136969000 |
| N  | 1.750788000  | -3.292542000 | -2.223188000 |
| C  | 2.147082000  | -1.508532000 | 2.646429000  |
| H  | 1.492116000  | -0.718868000 | 2.299556000  |
| C  | 2.603540000  | -1.551207000 | 3.956471000  |
| H  | 2.300899000  | -0.775983000 | 4.651782000  |
| C  | 3.445131000  | -2.594678000 | 4.347605000  |
| H  | 3.820809000  | -2.657806000 | 5.363382000  |
| C  | 3.794548000  | -3.558258000 | 3.407898000  |
| H  | 4.444346000  | -4.379831000 | 3.685920000  |
| C  | 3.308967000  | -3.473109000 | 2.100386000  |
| C  | 3.626985000  | -4.456287000 | 1.052688000  |
| C  | 4.437100000  | -5.587608000 | 1.170537000  |
| H  | 4.921108000  | -5.830491000 | 2.109372000  |
| C  | 4.618503000  | -6.409148000 | 0.055575000  |
| C  | 3.996967000  | -6.099983000 | -1.156516000 |
| H  | 4.141544000  | -6.739168000 | -2.019705000 |
| C  | 3.194367000  | -4.960015000 | -1.234141000 |
| C  | 2.461539000  | -4.462853000 | -2.409455000 |
| C  | 2.464205000  | -5.109535000 | -3.648204000 |
| H  | 3.027413000  | -6.027024000 | -3.773078000 |
| C  | 1.746830000  | -4.579484000 | -4.715085000 |
| H  | 1.746711000  | -5.079308000 | -5.677930000 |
| C  | 1.030638000  | -3.396713000 | -4.519821000 |
| H  | 0.455285000  | -2.943819000 | -5.319768000 |

|   |              |              |              |
|---|--------------|--------------|--------------|
| C | 1.057866000  | -2.790662000 | -3.271460000 |
| H | 0.516730000  | -1.873156000 | -3.075288000 |
| C | -0.369813000 | -4.513855000 | 0.407820000  |
| H | 0.469877000  | -5.196240000 | 0.468478000  |
| C | -1.659501000 | -4.980796000 | 0.546606000  |
| H | -1.856265000 | -6.031012000 | 0.727302000  |
| C | -2.719320000 | -4.067539000 | 0.413253000  |
| C | -2.417668000 | -2.721555000 | 0.188991000  |
| H | -3.211670000 | -2.009765000 | 0.030786000  |
| C | -1.084788000 | -2.287074000 | 0.114341000  |
| C | -1.814395000 | 5.065493000  | -1.408818000 |
| C | -0.638128000 | -0.906772000 | -0.133965000 |
| C | -3.146419000 | 5.035408000  | -0.986649000 |
| C | 0.742336000  | -0.851860000 | -0.429787000 |
| C | -3.705752000 | 3.889073000  | -0.437962000 |
| C | 1.331146000  | 0.357034000  | -0.836602000 |
| C | -2.941107000 | 2.711705000  | -0.266437000 |
| C | 0.565658000  | 1.509224000  | -1.091727000 |
| C | -1.593765000 | 2.694265000  | -0.757267000 |
| C | -0.810499000 | 1.494444000  | -0.650747000 |
| C | -1.036045000 | 3.882000000  | -1.342553000 |
| C | -1.397199000 | 0.298406000  | -0.103978000 |
| C | 0.277482000  | 3.792837000  | -1.911305000 |
| C | -2.690543000 | 0.417060000  | 0.502754000  |
| H | 0.663427000  | 4.631696000  | -2.478309000 |
| H | -3.075721000 | -0.404371000 | 1.093014000  |
| C | 1.038186000  | 2.670931000  | -1.787438000 |
| C | -3.428129000 | 1.560953000  | 0.426831000  |
| H | 1.999009000  | 2.641641000  | -2.285043000 |
| H | -4.388105000 | 1.609502000  | 0.927730000  |
| O | -3.963226000 | -4.574659000 | 0.506045000  |
| C | -5.099520000 | -3.700117000 | 0.378711000  |
| C | -6.386456000 | -4.517412000 | 0.564148000  |
| C | -7.568214000 | -3.539269000 | 0.415979000  |
| C | -6.478402000 | -5.611941000 | -0.515894000 |
| C | -6.410769000 | -5.153327000 | 1.967157000  |
| H | -5.031964000 | -2.911752000 | 1.139708000  |
| H | -5.081305000 | -3.232086000 | -0.614136000 |
| H | -8.517712000 | -4.072549000 | 0.538081000  |
| H | -7.574854000 | -3.065510000 | -0.573278000 |
| H | -7.529736000 | -2.746265000 | 1.172775000  |
| H | -6.476426000 | -5.175100000 | -1.522245000 |
| H | -7.405580000 | -6.185087000 | -0.400215000 |
| H | -5.637262000 | -6.309078000 | -0.446284000 |
| H | -6.354344000 | -4.386155000 | 2.749404000  |
| H | -5.571138000 | -5.841956000 | 2.105771000  |
| H | -7.339831000 | -5.715880000 | 2.114990000  |
| H | 5.245416000  | -7.291013000 | 0.131100000  |
| N | 2.745468000  | 0.233918000  | -0.988018000 |
| C | 3.766193000  | 1.126325000  | -1.143949000 |
| C | 4.957383000  | 0.426136000  | -1.126880000 |

|   |              |              |              |
|---|--------------|--------------|--------------|
| C | 4.599395000  | -0.917128000 | -0.932134000 |
| N | 3.270648000  | -1.039874000 | -0.834351000 |
| H | 5.224514000  | -1.793924000 | -0.844399000 |
| H | 5.950880000  | 0.835206000  | -1.231791000 |
| H | 3.586127000  | 2.184390000  | -1.219706000 |
| N | -5.070077000 | 3.943888000  | -0.031634000 |
| N | -5.527604000 | 5.016543000  | 0.674117000  |
| C | -6.835817000 | 4.802680000  | 0.803488000  |
| C | -7.242548000 | 3.602383000  | 0.177430000  |
| C | -6.081864000 | 3.080893000  | -0.354519000 |
| C | -1.298280000 | 6.368977000  | -1.922811000 |
| C | -0.068184000 | 6.883935000  | -1.481760000 |
| C | 0.344452000  | 8.139679000  | -1.944858000 |
| C | -0.495947000 | 8.831330000  | -2.831111000 |
| C | -1.698656000 | 8.240299000  | -3.190849000 |
| N | -2.114238000 | 7.039338000  | -2.758071000 |
| O | 1.494556000  | 8.754476000  | -1.595796000 |
| C | 2.396403000  | 8.098836000  | -0.687874000 |
| C | 3.608703000  | 9.007777000  | -0.435920000 |
| C | 4.541830000  | 8.259171000  | 0.535566000  |
| C | 4.348431000  | 9.283563000  | -1.758715000 |
| C | 3.150753000  | 10.333313000 | 0.201635000  |
| H | -7.441240000 | 5.516847000  | 1.347300000  |
| H | -8.235646000 | 3.181608000  | 0.116762000  |
| H | -5.897389000 | 2.195879000  | -0.944845000 |
| H | 0.528195000  | 6.321029000  | -0.776139000 |
| H | -0.205796000 | 9.806072000  | -3.208155000 |
| H | -2.371969000 | 8.761388000  | -3.869304000 |
| H | 2.715884000  | 7.143834000  | -1.125904000 |
| H | 1.872619000  | 7.892270000  | 0.254561000  |
| H | 4.040357000  | 8.043118000  | 1.486902000  |
| H | 5.426722000  | 8.867469000  | 0.754402000  |
| H | 4.885642000  | 7.308915000  | 0.108990000  |
| H | 4.695257000  | 8.350093000  | -2.219137000 |
| H | 5.225787000  | 9.916361000  | -1.581140000 |
| H | 3.699559000  | 9.795636000  | -2.476347000 |
| H | 2.628239000  | 10.155758000 | 1.149925000  |
| H | 2.472787000  | 10.879580000 | -0.461903000 |
| H | 4.014416000  | 10.975597000 | 0.409488000  |
| H | -3.754473000 | 5.926392000  | -1.080844000 |

Cartesian coordinates of DFT-optimized structure of **1b** complex by B3LYP/Def2-TZVP; 6-31G(d,p)/CH<sub>3</sub>CN, charge = 1, multiplicity = 1

|    |              |              |              |
|----|--------------|--------------|--------------|
| Ru | 1.811989000  | -3.049688000 | 0.021685000  |
| N  | -1.652242000 | 6.835478000  | -1.648269000 |
| N  | -0.160747000 | -3.732504000 | 0.292898000  |
| N  | 2.288687000  | -3.235701000 | 2.054316000  |
| N  | 2.871344000  | -4.795240000 | 0.055319000  |
| N  | 1.786550000  | -3.617314000 | -1.995610000 |

|   |              |              |              |
|---|--------------|--------------|--------------|
| N | -5.207200000 | 4.754819000  | 1.513975000  |
| N | 3.354502000  | -1.644481000 | -0.266424000 |
| C | 1.946728000  | -2.391674000 | 3.048666000  |
| H | 1.362647000  | -1.529712000 | 2.748973000  |
| C | 2.309452000  | -2.597436000 | 4.375069000  |
| H | 2.004368000  | -1.881640000 | 5.130491000  |
| C | 3.062079000  | -3.726068000 | 4.700832000  |
| H | 3.363775000  | -3.918555000 | 5.725153000  |
| C | 3.421500000  | -4.607340000 | 3.685557000  |
| H | 4.005238000  | -5.491727000 | 3.913069000  |
| C | 3.029175000  | -4.352529000 | 2.368795000  |
| C | 3.364025000  | -5.239246000 | 1.237120000  |
| C | 4.099840000  | -6.426494000 | 1.283533000  |
| H | 4.502648000  | -6.799904000 | 2.217877000  |
| C | 4.311232000  | -7.132792000 | 0.097200000  |
| C | 3.794999000  | -6.656916000 | -1.110268000 |
| H | 3.963108000  | -7.207729000 | -2.028368000 |
| C | 3.065611000  | -5.464943000 | -1.106727000 |
| C | 2.444572000  | -4.795682000 | -2.266715000 |
| C | 2.504728000  | -5.302326000 | -3.567564000 |
| H | 3.026738000  | -6.232347000 | -3.760922000 |
| C | 1.894115000  | -4.613121000 | -4.610991000 |
| H | 1.937285000  | -5.001781000 | -5.623085000 |
| C | 1.229403000  | -3.419413000 | -4.328982000 |
| H | 0.738010000  | -2.846112000 | -5.107423000 |
| C | 1.200017000  | -2.960581000 | -3.016743000 |
| H | 0.695992000  | -2.039046000 | -2.750964000 |
| C | -1.163229000 | 8.043421000  | -1.970840000 |
| C | -0.542586000 | -5.025609000 | 0.341381000  |
| H | -1.799321000 | 8.661691000  | -2.602157000 |
| H | 0.259742000  | -5.753922000 | 0.381011000  |
| C | 0.070669000  | 8.527256000  | -1.559801000 |
| C | -1.859860000 | -5.439440000 | 0.330152000  |
| H | 0.422684000  | 9.510601000  | -1.852540000 |
| H | -2.117136000 | -6.491498000 | 0.369391000  |
| C | 0.861665000  | 7.711296000  | -0.735966000 |
| C | -2.863545000 | -4.461883000 | 0.227795000  |
| C | 0.367547000  | 6.450436000  | -0.379535000 |
| C | -2.486800000 | -3.115939000 | 0.190638000  |
| H | 0.921251000  | 5.795706000  | 0.280180000  |
| H | -3.233467000 | -2.347711000 | 0.066406000  |
| C | -0.885328000 | 6.046984000  | -0.871069000 |
| C | -1.131821000 | -2.753000000 | 0.262471000  |
| C | -1.475273000 | 4.730890000  | -0.485973000 |
| C | -0.599480000 | -1.381089000 | 0.204133000  |
| C | -2.808083000 | 4.724892000  | -0.070919000 |
| C | 0.797000000  | -1.357424000 | -0.012774000 |
| C | -3.461982000 | 3.564077000  | 0.345208000  |
| C | 1.480884000  | -0.145573000 | -0.256848000 |
| C | -4.897987000 | 3.694398000  | 0.730829000  |
| C | 2.942972000  | -0.320886000 | -0.289993000 |

|   |               |              |              |
|---|---------------|--------------|--------------|
| C | -5.869970000  | 2.818221000  | 0.243505000  |
| C | 3.900614000   | 0.693780000  | -0.243580000 |
| H | -5.611427000  | 1.997444000  | -0.415993000 |
| H | 3.609989000   | 1.731646000  | -0.166358000 |
| C | -7.216588000  | 3.018186000  | 0.586030000  |
| C | 5.270325000   | 0.397776000  | -0.250252000 |
| C | -7.538593000  | 4.103409000  | 1.410689000  |
| C | 5.666900000   | -0.945894000 | -0.292875000 |
| H | -8.554242000  | 4.319844000  | 1.716908000  |
| H | 6.704845000   | -1.251044000 | -0.308273000 |
| C | -6.493503000  | 4.927967000  | 1.829583000  |
| C | 4.670114000   | -1.912752000 | -0.282513000 |
| H | -6.717825000  | 5.784167000  | 2.464207000  |
| H | 4.938011000   | -2.963712000 | -0.275861000 |
| C | -2.743968000  | 2.340223000  | 0.388331000  |
| C | 0.738522000   | 1.052651000  | -0.437695000 |
| C | -1.382578000  | 2.302560000  | -0.064602000 |
| C | -0.650124000  | 1.064459000  | -0.054145000 |
| C | -0.755466000  | 3.508606000  | -0.525226000 |
| C | -1.306789000  | -0.154430000 | 0.343321000  |
| C | 0.561312000   | 3.406649000  | -1.080195000 |
| C | -2.617274000  | -0.041434000 | 0.913769000  |
| H | 0.994894000   | 4.270367000  | -1.570806000 |
| H | -3.061915000  | -0.905394000 | 1.391973000  |
| C | 1.270078000   | 2.243827000  | -1.032289000 |
| C | -3.296804000  | 1.140189000  | 0.940826000  |
| H | 2.241502000   | 2.208337000  | -1.509349000 |
| H | -4.270527000  | 1.179279000  | 1.415280000  |
| O | 2.049561000   | 8.218279000  | -0.341031000 |
| O | 6.106418000   | 1.453625000  | -0.204806000 |
| O | -4.132514000  | -4.910085000 | 0.163797000  |
| O | -8.103689000  | 2.137982000  | 0.073637000  |
| C | -9.501845000  | 2.309566000  | 0.364334000  |
| C | -10.306035000 | 1.212613000  | -0.348384000 |
| C | -11.790056000 | 1.438873000  | 0.000487000  |
| C | -9.862671000  | -0.176486000 | 0.148436000  |
| C | -10.109099000 | 1.318781000  | -1.872457000 |
| C | -5.212722000  | -3.969006000 | 0.028578000  |
| C | -6.542985000  | -4.734720000 | -0.026646000 |
| C | -7.661739000  | -3.685628000 | -0.177561000 |
| C | -6.555643000  | -5.685826000 | -1.238333000 |
| C | -6.748923000  | -5.531844000 | 1.275393000  |
| C | 2.907943000   | 7.428167000  | 0.499402000  |
| C | 4.221693000   | 8.188117000  | 0.735907000  |
| C | 4.941841000   | 8.424891000  | -0.605131000 |
| C | 3.938440000   | 9.533453000  | 1.430633000  |
| C | 5.097298000   | 7.306896000  | 1.648085000  |
| C | 7.527716000   | 1.224887000  | -0.182619000 |
| C | 8.253519000   | 2.574790000  | -0.087689000 |
| C | 7.851160000   | 3.300562000  | 1.210173000  |
| C | 7.912174000   | 3.447170000  | -1.310471000 |

|   |               |              |              |
|---|---------------|--------------|--------------|
| C | 9.765194000   | 2.274717000  | -0.067758000 |
| H | -9.820978000  | 3.302149000  | 0.020291000  |
| H | -9.652858000  | 2.251891000  | 1.450377000  |
| H | -12.136076000 | 2.423118000  | -0.337955000 |
| H | -11.962293000 | 1.371090000  | 1.081581000  |
| H | -12.412922000 | 0.679656000  | -0.485964000 |
| H | -10.003748000 | -0.272238000 | 1.232251000  |
| H | -8.806311000  | -0.359080000 | -0.073611000 |
| H | -10.452954000 | -0.962072000 | -0.337546000 |
| H | -10.434409000 | 2.298321000  | -2.244474000 |
| H | -10.697579000 | 0.551102000  | -2.388220000 |
| H | -9.058191000  | 1.183616000  | -2.147579000 |
| H | -5.199921000  | -3.281906000 | 0.884848000  |
| H | -5.067057000  | -3.386356000 | -0.890315000 |
| H | -8.639601000  | -4.178625000 | -0.218352000 |
| H | -7.541955000  | -3.102203000 | -1.098592000 |
| H | -7.674058000  | -2.986920000 | 0.667933000  |
| H | -6.419635000  | -5.132591000 | -2.175894000 |
| H | -7.512998000  | -6.216434000 | -1.296979000 |
| H | -5.757693000  | -6.431533000 | -1.164830000 |
| H | -6.755080000  | -4.867484000 | 2.148429000  |
| H | -5.954789000  | -6.271890000 | 1.417287000  |
| H | -7.707635000  | -6.062752000 | 1.250515000  |
| H | 3.107295000   | 6.466308000  | 0.009386000  |
| H | 2.397848000   | 7.234631000  | 1.452457000  |
| H | 5.162518000   | 7.474830000  | -1.107670000 |
| H | 5.891716000   | 8.947180000  | -0.442459000 |
| H | 4.331382000   | 9.032224000  | -1.281073000 |
| H | 3.301233000   | 10.173061000 | 0.811622000  |
| H | 4.875587000   | 10.069274000 | 1.621439000  |
| H | 3.435596000   | 9.382406000  | 2.393907000  |
| H | 5.313936000   | 6.337569000  | 1.182298000  |
| H | 4.608961000   | 7.119366000  | 2.612138000  |
| H | 6.053932000   | 7.802705000  | 1.848348000  |
| H | 7.818780000   | 0.693712000  | -1.098246000 |
| H | 7.775617000   | 0.595307000  | 0.681631000  |
| H | 8.389859000   | 4.251087000  | 1.297726000  |
| H | 8.092026000   | 2.694790000  | 2.092595000  |
| H | 6.777649000   | 3.515014000  | 1.228589000  |
| H | 6.838718000   | 3.656078000  | -1.361019000 |
| H | 8.206655000   | 2.951924000  | -2.244027000 |
| H | 8.442687000   | 4.404919000  | -1.256593000 |
| H | 10.037860000  | 1.647353000  | 0.789700000  |
| H | 10.334971000  | 3.207862000  | 0.006007000  |
| H | 10.083765000  | 1.758697000  | -0.981679000 |
| H | -3.356451000  | 5.659481000  | -0.071504000 |
| H | 4.880183000   | -8.056248000 | 0.113608000  |

Cartesian coordinates of DFT-optimized structure of **2b** complex by B3LYP/Def2-TZVP;  
6-31G(d,p)/CH<sub>3</sub>CN, charge = 1, multiplicity = 1

|    |              |              |              |
|----|--------------|--------------|--------------|
| Ru | 1.958137000  | -1.358021000 | -0.018038000 |
| N  | 0.459712000  | -2.827121000 | 0.147701000  |
| N  | 2.427155000  | -1.430042000 | 2.024022000  |
| N  | 3.650721000  | -2.502142000 | -0.006308000 |
| N  | 2.221672000  | -1.774984000 | -2.055932000 |
| N  | 2.763109000  | 0.580174000  | -0.191838000 |
| C  | 1.747615000  | -0.849304000 | 3.033378000  |
| H  | 0.865499000  | -0.291350000 | 2.742752000  |
| C  | 2.136691000  | -0.949307000 | 4.364513000  |
| H  | 1.548239000  | -0.458811000 | 5.132137000  |
| C  | 3.281271000  | -1.682132000 | 4.678989000  |
| H  | 3.615225000  | -1.781153000 | 5.706577000  |
| C  | 3.992784000  | -2.288352000 | 3.647960000  |
| H  | 4.885191000  | -2.863178000 | 3.866775000  |
| C  | 3.556744000  | -2.155660000 | 2.327047000  |
| C  | 4.252256000  | -2.768483000 | 1.178151000  |
| C  | 5.407160000  | -3.554690000 | 1.211927000  |
| H  | 5.904036000  | -3.780228000 | 2.148265000  |
| C  | 5.917031000  | -4.052000000 | 0.010422000  |
| C  | 5.281196000  | -3.765083000 | -1.199669000 |
| H  | 5.679933000  | -4.153985000 | -2.129361000 |
| C  | 4.130075000  | -2.972947000 | -1.182914000 |
| C  | 3.318865000  | -2.554650000 | -2.343202000 |
| C  | 3.624012000  | -2.909314000 | -3.659867000 |
| H  | 4.493832000  | -3.522255000 | -3.865767000 |
| C  | 2.811591000  | -2.474529000 | -4.702714000 |
| H  | 3.043189000  | -2.746829000 | -5.727171000 |
| C  | 1.700279000  | -1.685933000 | -4.404124000 |
| H  | 1.036767000  | -1.323081000 | -5.181397000 |
| C  | 1.443646000  | -1.361609000 | -3.076561000 |
| H  | 0.593095000  | -0.750823000 | -2.798485000 |
| C  | 0.660521000  | -4.161136000 | 0.122195000  |
| H  | 1.695154000  | -4.484437000 | 0.147936000  |
| C  | -0.358329000 | -5.090969000 | 0.057848000  |
| H  | -0.146408000 | -6.153683000 | 0.041832000  |
| C  | -1.681402000 | -4.625443000 | -0.019456000 |
| C  | -1.908313000 | -3.245972000 | 0.011402000  |
| H  | -2.909016000 | -2.859740000 | -0.099840000 |
| C  | -0.834206000 | -2.350095000 | 0.135025000  |
| C  | -4.321307000 | 4.281284000  | -0.297789000 |
| C  | -0.932586000 | -0.880056000 | 0.155359000  |
| C  | -5.540928000 | 3.708655000  | 0.048116000  |
| C  | 0.323929000  | -0.254429000 | -0.016611000 |
| C  | -5.612859000 | 2.359783000  | 0.379562000  |
| C  | 0.431842000  | 1.145869000  | -0.176884000 |
| C  | 1.831855000  | 1.606484000  | -0.168240000 |
| C  | 2.270681000  | 2.925853000  | -0.046885000 |
| H  | 1.569189000  | 3.739357000  | 0.069701000  |
| C  | 3.637812000  | 3.235438000  | -0.030043000 |
| C  | 4.564304000  | 2.187976000  | -0.121559000 |

|   |              |              |              |
|---|--------------|--------------|--------------|
| H | 5.634058000  | 2.349590000  | -0.121184000 |
| C | 4.069021000  | 0.892126000  | -0.181801000 |
| H | 4.755668000  | 0.053276000  | -0.213591000 |
| C | -4.452825000 | 1.552677000  | 0.421666000  |
| C | -0.746485000 | 1.925368000  | -0.326435000 |
| C | -3.201485000 | 2.126844000  | 0.020448000  |
| C | -2.011924000 | 1.322440000  | 0.007026000  |
| C | -3.140807000 | 3.506541000  | -0.366359000 |
| C | -2.094025000 | -0.079443000 | 0.328727000  |
| C | -1.900441000 | 4.017838000  | -0.863905000 |
| C | -3.334399000 | -0.564373000 | 0.861701000  |
| H | -1.870252000 | 5.013043000  | -1.292270000 |
| H | -3.371664000 | -1.555985000 | 1.294722000  |
| C | -0.765531000 | 3.263956000  | -0.841569000 |
| C | -4.456739000 | 0.207238000  | 0.908068000  |
| H | 0.135593000  | 3.674374000  | -1.279028000 |
| H | -5.361554000 | -0.194764000 | 1.349082000  |
| O | 3.950555000  | 4.540739000  | 0.083385000  |
| O | -2.642162000 | -5.563216000 | -0.126718000 |
| C | -4.022932000 | -5.162901000 | -0.197369000 |
| C | -4.907683000 | -6.416517000 | -0.261377000 |
| C | -6.369430000 | -5.934435000 | -0.340985000 |
| C | -4.564273000 | -7.243488000 | -1.514856000 |
| C | -4.709718000 | -7.267980000 | 1.007080000  |
| C | 5.336412000  | 4.931485000  | 0.107035000  |
| C | 5.427646000  | 6.457498000  | 0.250451000  |
| C | 4.774879000  | 6.903643000  | 1.572548000  |
| C | 4.734630000  | 7.143740000  | -0.941902000 |
| C | 6.925487000  | 6.820695000  | 0.261135000  |
| H | -4.268523000 | -4.565888000 | 0.690477000  |
| H | -4.171052000 | -4.541919000 | -1.090414000 |
| H | -7.048498000 | -6.793480000 | -0.383839000 |
| H | -6.542746000 | -5.325589000 | -1.236714000 |
| H | -6.642466000 | -5.335054000 | 0.536099000  |
| H | -4.711622000 | -6.654843000 | -2.428899000 |
| H | -5.209044000 | -8.127782000 | -1.577372000 |
| H | -3.523689000 | -7.582855000 | -1.493498000 |
| H | -4.957364000 | -6.695241000 | 1.909488000  |
| H | -3.674445000 | -7.612290000 | 1.096710000  |
| H | -5.360356000 | -8.149660000 | 0.979831000  |
| H | 5.815782000  | 4.603248000  | -0.824297000 |
| H | 5.833565000  | 4.436391000  | 0.951104000  |
| H | 4.854587000  | 7.990576000  | 1.689834000  |
| H | 5.267739000  | 6.435433000  | 2.433713000  |
| H | 3.713819000  | 6.635732000  | 1.601506000  |
| H | 3.670589000  | 6.889743000  | -0.982433000 |
| H | 5.192827000  | 6.842193000  | -1.892002000 |
| H | 4.820983000  | 8.233242000  | -0.858135000 |
| H | 7.448633000  | 6.341749000  | 1.097850000  |
| H | 7.051368000  | 7.904411000  | 0.364115000  |
| H | 7.419006000  | 6.513397000  | -0.668970000 |

|   |              |              |              |
|---|--------------|--------------|--------------|
| H | -6.437059000 | 4.314882000  | 0.059440000  |
| H | 6.812009000  | -4.664976000 | 0.017160000  |
| N | -4.311589000 | 5.669363000  | -0.610271000 |
| C | -3.486590000 | 6.641742000  | -0.112174000 |
| C | -3.932049000 | 7.845076000  | -0.616559000 |
| C | -5.051004000 | 7.503580000  | -1.410479000 |
| N | -5.288685000 | 6.193547000  | -1.403835000 |
| N | -6.892043000 | 1.828652000  | 0.704926000  |
| N | -7.731351000 | 2.528587000  | 1.520138000  |
| C | -8.856325000 | 1.816678000  | 1.536988000  |
| C | -8.766223000 | 0.660419000  | 0.728330000  |
| C | -7.492028000 | 0.704699000  | 0.203700000  |
| H | -6.978964000 | 0.057158000  | -0.491399000 |
| H | -9.520783000 | -0.091352000 | 0.548463000  |
| H | -9.692999000 | 2.156553000  | 2.134196000  |
| H | -5.689588000 | 8.157972000  | -1.990285000 |
| H | -3.515078000 | 8.824537000  | -0.433067000 |
| H | -2.682038000 | 6.401872000  | 0.566680000  |

Cartesian coordinates of DFT-optimized structure of **3b** complex by B3LYP/Def2-TZVP; 6-31G(d,p)/CH<sub>3</sub>CN, charge = 1, multiplicity = 1

|   |              |              |              |
|---|--------------|--------------|--------------|
| C | 2.334824000  | -2.455716000 | -0.301344000 |
| C | 3.694698000  | -2.454482000 | -0.243992000 |
| C | 4.432833000  | -1.237959000 | -0.113385000 |
| C | 3.707160000  | -0.003167000 | -0.029082000 |
| C | 2.270337000  | -0.001375000 | -0.073893000 |
| C | 1.562801000  | -1.249300000 | -0.248032000 |
| C | 4.426481000  | 1.231189000  | 0.111796000  |
| C | 3.684808000  | 2.425796000  | 0.372823000  |
| C | 2.324486000  | 2.426393000  | 0.368707000  |
| C | 1.562301000  | 1.249027000  | 0.070298000  |
| C | 0.151972000  | -1.190866000 | -0.316031000 |
| C | -0.548279000 | 0.009672000  | -0.160454000 |
| C | 0.155117000  | 1.210354000  | -0.023604000 |
| C | 5.845164000  | -1.201363000 | -0.061062000 |
| C | 6.534550000  | 0.004056000  | -0.011802000 |
| C | 5.838065000  | 1.206249000  | 0.056176000  |
| H | 1.838372000  | -3.412712000 | -0.352317000 |
| H | 4.225834000  | -3.396716000 | -0.300554000 |
| H | 1.816046000  | 3.337094000  | 0.651582000  |
| H | 4.216215000  | 3.337112000  | 0.620300000  |
| N | -0.747174000 | -2.290256000 | -0.510311000 |
| N | -2.090726000 | -2.015276000 | -0.312215000 |
| C | -2.755504000 | -3.133645000 | -0.607829000 |
| C | -1.870073000 | -4.143086000 | -1.020229000 |
| C | -0.613992000 | -3.572950000 | -0.959692000 |
| N | -0.733363000 | 2.330624000  | 0.039883000  |
| N | -2.079557000 | 2.032675000  | 0.165589000  |
| C | -2.729995000 | 3.197388000  | 0.126749000  |

|    |              |              |              |
|----|--------------|--------------|--------------|
| C  | -1.830956000 | 4.263148000  | -0.046538000 |
| C  | -0.581422000 | 3.678960000  | -0.112531000 |
| N  | 6.617020000  | -2.399083000 | -0.093367000 |
| N  | 7.638258000  | -2.524468000 | -0.987439000 |
| C  | 8.203914000  | -3.693271000 | -0.690231000 |
| C  | 6.557169000  | -3.464136000 | 0.762857000  |
| C  | 7.568476000  | -4.329349000 | 0.400337000  |
| N  | 6.597568000  | 2.408164000  | 0.103169000  |
| N  | 7.696986000  | 2.486857000  | 0.906037000  |
| C  | 8.222277000  | 3.681389000  | 0.641981000  |
| C  | 7.482483000  | 4.383182000  | -0.337376000 |
| C  | 6.449531000  | 3.531185000  | -0.665806000 |
| C  | -1.737266000 | -0.343860000 | 3.003713000  |
| C  | -1.975200000 | -0.498561000 | 4.365458000  |
| C  | -3.293436000 | -0.550913000 | 4.816557000  |
| C  | -4.324526000 | -0.446424000 | 3.887013000  |
| C  | -4.027610000 | -0.293789000 | 2.530744000  |
| N  | -2.724728000 | -0.242534000 | 2.093184000  |
| C  | -5.063219000 | -0.175254000 | 1.483830000  |
| N  | -4.547753000 | -0.027026000 | 0.242169000  |
| C  | -5.326447000 | 0.102667000  | -0.856767000 |
| C  | -6.717995000 | 0.084131000  | -0.728821000 |
| C  | -7.272831000 | -0.070273000 | 0.543389000  |
| C  | -6.448995000 | -0.201703000 | 1.663195000  |
| C  | -4.548387000 | 0.250382000  | -2.104406000 |
| N  | -3.180601000 | 0.228013000  | -1.962914000 |
| C  | -2.417067000 | 0.351488000  | -3.065769000 |
| C  | -2.949733000 | 0.505311000  | -4.341504000 |
| C  | -4.335583000 | 0.532612000  | -4.492865000 |
| C  | -5.137060000 | 0.402638000  | -3.361961000 |
| H  | -0.729122000 | -0.296644000 | 2.609744000  |
| H  | -1.137415000 | -0.574865000 | 5.049754000  |
| H  | -3.517693000 | -0.669847000 | 5.871423000  |
| H  | -5.357238000 | -0.481838000 | 4.213645000  |
| H  | -7.361945000 | 0.185916000  | -1.594331000 |
| H  | -6.884696000 | -0.321970000 | 2.648039000  |
| H  | -1.346780000 | 0.323245000  | -2.899396000 |
| H  | -2.283860000 | 0.600815000  | -5.192027000 |
| H  | -4.787099000 | 0.651808000  | -5.472214000 |
| H  | -6.216622000 | 0.419518000  | -3.455483000 |
| Ru | -2.520415000 | -0.002630000 | 0.014441000  |
| H  | -3.832516000 | -3.153524000 | -0.522268000 |
| H  | -2.110524000 | -5.148789000 | -1.330264000 |
| H  | 0.336465000  | -3.986729000 | -1.243698000 |
| H  | -3.807129000 | 3.211927000  | 0.211997000  |
| H  | -2.059431000 | 5.315366000  | -0.123952000 |
| H  | 0.378254000  | 4.128571000  | -0.295347000 |
| H  | 9.047239000  | -4.040696000 | -1.273620000 |
| H  | 5.827948000  | -3.504384000 | 1.558454000  |
| H  | 7.814329000  | -5.275746000 | 0.859499000  |
| H  | 9.112925000  | 4.000021000  | 1.168692000  |

|   |              |              |              |
|---|--------------|--------------|--------------|
| H | 7.676655000  | 5.363087000  | -0.748406000 |
| H | 5.649478000  | 3.617022000  | -1.385826000 |
| H | 7.616780000  | 0.007808000  | -0.016558000 |
| H | -8.350885000 | -0.088292000 | 0.662373000  |

Cartesian coordinates of DFT-optimized structure of **4b** complex by B3LYP/Def2-TZVP;  
6-31G(d,p)/CH<sub>3</sub>CN, charge = 1, multiplicity = 1

|    |              |              |              |
|----|--------------|--------------|--------------|
| Ru | 3.872531000  | -0.355490000 | -0.005114000 |
| N  | -6.128117000 | 2.700728000  | -1.769440000 |
| N  | 3.222129000  | -2.270149000 | 0.528422000  |
| N  | 4.339971000  | 0.176583000  | 1.971314000  |
| N  | 5.901867000  | -0.558808000 | 0.019288000  |
| N  | 4.270073000  | -0.975171000 | -1.970660000 |
| N  | -6.614810000 | -1.334702000 | 1.448916000  |
| N  | 3.631419000  | 1.648006000  | -0.551509000 |
| C  | 3.480842000  | 0.548450000  | 2.940122000  |
| H  | 2.435412000  | 0.570411000  | 2.656125000  |
| C  | 3.889486000  | 0.884571000  | 4.226538000  |
| H  | 3.149863000  | 1.176494000  | 4.963918000  |
| C  | 5.248462000  | 0.836459000  | 4.535270000  |
| H  | 5.604126000  | 1.091362000  | 5.528146000  |
| C  | 6.147909000  | 0.453380000  | 3.544212000  |
| H  | 7.209070000  | 0.408304000  | 3.759368000  |
| C  | 5.681910000  | 0.126613000  | 2.268572000  |
| C  | 6.570258000  | -0.289565000 | 1.164236000  |
| C  | 7.961081000  | -0.420637000 | 1.205198000  |
| H  | 8.517762000  | -0.210165000 | 2.110882000  |
| C  | 8.630529000  | -0.830875000 | 0.050300000  |
| C  | 7.919365000  | -1.103764000 | -1.120225000 |
| H  | 8.443628000  | -1.421370000 | -2.013836000 |
| C  | 6.529522000  | -0.957753000 | -1.110997000 |
| C  | 5.601835000  | -1.194150000 | -2.236110000 |
| C  | 6.022520000  | -1.614021000 | -3.500146000 |
| H  | 7.076082000  | -1.782047000 | -3.690829000 |
| C  | 5.087772000  | -1.816230000 | -4.511758000 |
| H  | 5.408401000  | -2.142390000 | -5.495682000 |
| C  | 3.739528000  | -1.592421000 | -4.235033000 |
| H  | 2.973592000  | -1.736609000 | -4.989060000 |
| C  | 3.376463000  | -1.175172000 | -2.958751000 |
| H  | 2.340982000  | -0.990074000 | -2.698532000 |
| C  | -6.813590000 | 3.802219000  | -2.115591000 |
| C  | 3.735763000  | -3.492067000 | 0.688568000  |
| H  | -7.676466000 | 3.643348000  | -2.760248000 |
| C  | -6.489484000 | 5.088995000  | -1.710296000 |
| H  | -7.076095000 | 5.947612000  | -2.018890000 |
| C  | -5.378634000 | 5.259498000  | -0.869304000 |
| C  | -4.648991000 | 4.124359000  | -0.495109000 |
| H  | -3.801241000 | 4.195450000  | 0.173525000  |
| C  | -5.052239000 | 2.867753000  | -0.977050000 |

|   |              |              |              |
|---|--------------|--------------|--------------|
| N | 1.846180000  | -2.419663000 | 0.543403000  |
| C | -4.343698000 | 1.621869000  | -0.558511000 |
| C | 1.081304000  | -1.235516000 | 0.305636000  |
| C | -5.130646000 | 0.555339000  | -0.122222000 |
| C | 1.901765000  | -0.157081000 | -0.031097000 |
| C | -4.585893000 | -0.646994000 | 0.331826000  |
| C | 1.322485000  | 1.062592000  | -0.386680000 |
| C | -5.542957000 | -1.724434000 | 0.719197000  |
| N | 2.314124000  | 2.069383000  | -0.602733000 |
| C | -5.379028000 | -3.039820000 | 0.279794000  |
| H | -4.536983000 | -3.328368000 | -0.339059000 |
| C | -6.337010000 | -4.008028000 | 0.618188000  |
| C | -7.440011000 | -3.612184000 | 1.385060000  |
| H | -8.219593000 | -4.302590000 | 1.681295000  |
| C | -7.517565000 | -2.269482000 | 1.757942000  |
| C | 4.383188000  | 2.742148000  | -0.693962000 |
| H | -8.368999000 | -1.933412000 | 2.348087000  |
| C | -3.175324000 | -0.786285000 | 0.401934000  |
| C | -0.074056000 | 1.211912000  | -0.532260000 |
| C | -2.334580000 | 0.271926000  | -0.084468000 |
| C | -0.903816000 | 0.126817000  | -0.066676000 |
| C | -2.932771000 | 1.475920000  | -0.589643000 |
| C | -0.320274000 | -1.101829000 | 0.415629000  |
| C | -2.072345000 | 2.458903000  | -1.177568000 |
| C | -1.190700000 | -2.071237000 | 1.012006000  |
| H | -2.513054000 | 3.309718000  | -1.683715000 |
| H | -0.769469000 | -2.920071000 | 1.534780000  |
| C | -0.716717000 | 2.334656000  | -1.148054000 |
| C | -2.543991000 | -1.920269000 | 1.008248000  |
| H | -0.120563000 | 3.078635000  | -1.660134000 |
| H | -3.158869000 | -2.664300000 | 1.500596000  |
| O | -5.105634000 | 6.521904000  | -0.474721000 |
| O | -6.113660000 | -5.258292000 | 0.158760000  |
| C | -7.074689000 | -6.289347000 | 0.443953000  |
| C | -6.600345000 | -7.609067000 | -0.182054000 |
| C | -7.665788000 | -8.674338000 | 0.142219000  |
| C | -5.247284000 | -8.025918000 | 0.425108000  |
| C | -6.470890000 | -7.453918000 | -1.709175000 |
| C | -3.979469000 | 6.763012000  | 0.385815000  |
| C | -3.886880000 | 8.266341000  | 0.686626000  |
| C | -3.691715000 | 9.057078000  | -0.620939000 |
| C | -5.163178000 | 8.740661000  | 1.407175000  |
| C | -2.665789000 | 8.470959000  | 1.604269000  |
| H | -8.048715000 | -5.996571000 | 0.030217000  |
| H | -7.176360000 | -6.396386000 | 1.531939000  |
| H | -8.642463000 | -8.404842000 | -0.278121000 |
| H | -7.785871000 | -8.805879000 | 1.224462000  |
| H | -7.374516000 | -9.641937000 | -0.282160000 |
| H | -5.325324000 | -8.155878000 | 1.511729000  |
| H | -4.475759000 | -7.274749000 | 0.227797000  |
| H | -4.912923000 | -8.977784000 | -0.003706000 |

|   |              |              |              |
|---|--------------|--------------|--------------|
| H | -7.429195000 | -7.165780000 | -2.159005000 |
| H | -6.157760000 | -8.401024000 | -2.163790000 |
| H | -5.730477000 | -6.690668000 | -1.969106000 |
| H | -3.064912000 | 6.414368000  | -0.112083000 |
| H | -4.108082000 | 6.194254000  | 1.316116000  |
| H | -2.779493000 | 8.739997000  | -1.141535000 |
| H | -3.602269000 | 10.128834000 | -0.408922000 |
| H | -4.537588000 | 8.914535000  | -1.301023000 |
| H | -6.050254000 | 8.588433000  | 0.783993000  |
| H | -5.093332000 | 9.808562000  | 1.644651000  |
| H | -5.311074000 | 8.196223000  | 2.348180000  |
| H | -1.739090000 | 8.143660000  | 1.117128000  |
| H | -2.771802000 | 7.913583000  | 2.543049000  |
| H | -2.554924000 | 9.531812000  | 1.855948000  |
| H | -6.208705000 | 0.664352000  | -0.135790000 |
| H | 9.709903000  | -0.938232000 | 0.062405000  |
| C | 2.276340000  | 3.425927000  | -0.744864000 |
| C | 3.576983000  | 3.886052000  | -0.819838000 |
| C | 1.534240000  | -3.740822000 | 0.680848000  |
| C | 2.714130000  | -4.451441000 | 0.789795000  |
| H | 4.808317000  | -3.622198000 | 0.710831000  |
| H | 5.460315000  | 2.655397000  | -0.685682000 |
| H | 1.348731000  | 3.970995000  | -0.748950000 |
| H | 3.896659000  | 4.910160000  | -0.939999000 |
| H | 0.516664000  | -4.089387000 | 0.658037000  |
| H | 2.819278000  | -5.518455000 | 0.915737000  |

Cartesian coordinates of DFT-optimized structure of **5b** complex by B3LYP/Def2-TZVP; 6-31G(d,p)/CH<sub>3</sub>CN, charge = 1, multiplicity = 1

|    |              |              |              |
|----|--------------|--------------|--------------|
| Ru | 3.561205000  | 0.039823000  | 0.007787000  |
| N  | 2.355658000  | -1.664576000 | 0.263702000  |
| N  | 4.085576000  | 0.133072000  | 2.037355000  |
| N  | 5.443663000  | -0.750869000 | -0.001666000 |
| N  | 3.837255000  | -0.409492000 | -2.022902000 |
| N  | -6.696511000 | 2.307218000  | 1.598039000  |
| C  | 3.328679000  | 0.593918000  | 3.052778000  |
| H  | 2.344644000  | 0.953485000  | 2.776638000  |
| C  | 3.763921000  | 0.613839000  | 4.373506000  |
| H  | 3.108291000  | 0.997897000  | 5.147251000  |
| C  | 5.040513000  | 0.136419000  | 4.669263000  |
| H  | 5.413804000  | 0.136345000  | 5.688016000  |
| C  | 5.833300000  | -0.344083000 | 3.631050000  |
| H  | 6.828545000  | -0.721435000 | 3.835548000  |
| C  | 5.345554000  | -0.340945000 | 2.321888000  |
| C  | 6.121414000  | -0.836859000 | 1.167196000  |
| C  | 7.419028000  | -1.355752000 | 1.183195000  |
| H  | 7.980305000  | -1.431959000 | 2.107031000  |
| C  | 7.987940000  | -1.778395000 | -0.020186000 |
| C  | 7.270148000  | -1.680817000 | -1.214328000 |

|   |              |              |              |
|---|--------------|--------------|--------------|
| H | 7.716633000  | -2.009327000 | -2.145564000 |
| C | 5.976530000  | -1.153416000 | -1.179442000 |
| C | 5.060291000  | -0.964273000 | -2.322117000 |
| C | 5.387437000  | -1.317160000 | -3.633673000 |
| H | 6.355978000  | -1.752739000 | -3.849962000 |
| C | 4.468687000  | -1.110347000 | -4.658661000 |
| H | 4.716872000  | -1.382519000 | -5.679255000 |
| C | 3.229845000  | -0.550492000 | -4.347280000 |
| H | 2.480200000  | -0.371237000 | -5.110111000 |
| C | 2.956832000  | -0.217030000 | -3.024966000 |
| H | 2.007807000  | 0.219666000  | -2.737380000 |
| C | 2.801794000  | -2.937753000 | 0.277744000  |
| H | 3.878892000  | -3.059742000 | 0.301446000  |
| C | 1.974439000  | -4.042718000 | 0.250140000  |
| H | 2.380672000  | -5.047353000 | 0.261201000  |
| C | 0.587869000  | -3.834173000 | 0.170294000  |
| C | 0.106368000  | -2.520878000 | 0.169549000  |
| H | -0.949788000 | -2.332974000 | 0.061409000  |
| C | 0.993728000  | -1.436570000 | 0.253590000  |
| C | -3.594851000 | 4.504970000  | -0.231609000 |
| C | 0.622364000  | -0.008932000 | 0.231003000  |
| C | -4.695242000 | 3.740219000  | 0.141024000  |
| C | 1.745037000  | 0.817509000  | 0.025729000  |
| C | -4.567059000 | 2.389437000  | 0.465745000  |
| C | 1.584588000  | 2.195132000  | -0.173405000 |
| C | -5.821305000 | 1.652905000  | 0.799285000  |
| C | -6.103041000 | 0.400686000  | 0.249989000  |
| H | -5.409618000 | -0.090937000 | -0.422784000 |
| C | -7.323926000 | -0.225869000 | 0.546554000  |
| C | -8.225110000 | 0.439528000  | 1.387239000  |
| H | -9.184833000 | 0.018984000  | 1.659655000  |
| C | -7.852605000 | 1.695511000  | 1.868383000  |
| H | -8.539127000 | 2.238082000  | 2.516651000  |
| C | -3.276192000 | 1.795598000  | 0.479427000  |
| C | 0.312482000  | 2.783410000  | -0.309532000 |
| C | -2.135179000 | 2.566422000  | 0.072461000  |
| C | -0.827330000 | 1.971453000  | 0.049014000  |
| C | -2.305371000 | 3.936883000  | -0.316702000 |
| C | -0.665592000 | 0.581455000  | 0.385695000  |
| C | -1.173097000 | 4.653135000  | -0.822638000 |
| C | -1.806024000 | -0.102532000 | 0.919870000  |
| H | -1.315713000 | 5.642052000  | -1.242529000 |
| H | -1.677451000 | -1.084098000 | 1.358010000  |
| C | 0.072488000  | 4.104581000  | -0.813226000 |
| C | -3.042751000 | 0.469818000  | 0.965283000  |
| H | 0.887202000  | 4.664271000  | -1.254543000 |
| H | -3.863800000 | -0.080877000 | 1.409055000  |
| O | -0.180381000 | -4.937189000 | 0.090085000  |
| O | -7.533058000 | -1.432688000 | -0.022088000 |
| C | -8.781538000 | -2.106411000 | 0.215329000  |
| C | -8.790007000 | -3.443384000 | -0.540327000 |

|   |               |              |              |
|---|---------------|--------------|--------------|
| C | -10.148806000 | -4.113248000 | -0.256891000 |
| C | -7.650365000  | -4.346314000 | -0.031440000 |
| C | -8.637428000  | -3.198018000 | -2.053275000 |
| C | -1.610915000  | -4.804528000 | 0.003412000  |
| C | -2.240687000  | -6.202828000 | -0.077786000 |
| C | -3.767231000  | -6.007300000 | -0.159642000 |
| C | -1.741529000  | -6.933863000 | -1.338521000 |
| C | -1.888226000  | -7.016712000 | 1.181798000  |
| H | -9.604949000  | -1.466707000 | -0.128665000 |
| H | -8.899162000  | -2.276260000 | 1.293606000  |
| H | -10.982311000 | -3.491934000 | -0.606611000 |
| H | -10.288649000 | -4.297715000 | 0.815238000  |
| H | -10.210042000 | -5.077723000 | -0.773449000 |
| H | -7.749694000  | -4.538683000 | 1.044137000  |
| H | -6.671629000  | -3.887577000 | -0.205334000 |
| H | -7.669227000  | -5.312786000 | -0.548425000 |
| H | -9.448482000  | -2.565064000 | -2.434250000 |
| H | -8.668434000  | -4.148347000 | -2.598845000 |
| H | -7.686724000  | -2.705703000 | -2.281721000 |
| H | -1.974498000  | -4.268657000 | 0.889916000  |
| H | -1.863766000  | -4.218149000 | -0.889493000 |
| H | -4.270127000  | -6.979179000 | -0.218489000 |
| H | -4.050996000  | -5.429160000 | -1.047474000 |
| H | -4.152112000  | -5.484247000 | 0.724343000  |
| H | -1.997535000  | -6.374077000 | -2.246658000 |
| H | -2.203379000  | -7.925133000 | -1.413251000 |
| H | -0.655067000  | -7.066379000 | -1.316102000 |
| H | -2.244442000  | -6.514086000 | 2.089572000  |
| H | -0.806541000  | -7.157782000 | 1.273665000  |
| H | -2.357847000  | -8.006261000 | 1.139587000  |
| H | -5.672626000  | 4.205306000  | 0.174417000  |
| H | 8.993916000   | -2.184190000 | -0.027677000 |
| N | 2.837979000   | 2.874589000  | -0.257580000 |
| C | 3.210631000   | 4.186598000  | -0.213869000 |
| C | 4.591305000   | 4.239948000  | -0.227773000 |
| C | 5.014059000   | 2.899981000  | -0.258403000 |
| N | 3.964713000   | 2.074265000  | -0.263497000 |
| N | -3.816983000  | 5.877403000  | -0.544027000 |
| C | -3.173061000  | 6.972947000  | -0.036713000 |
| C | -3.803706000  | 8.086237000  | -0.551764000 |
| C | -4.837573000  | 7.563347000  | -1.361452000 |
| N | -4.854015000  | 6.231454000  | -1.354567000 |
| H | -2.349439000  | 6.869457000  | 0.653864000  |
| H | -3.557972000  | 9.121425000  | -0.364680000 |
| H | -5.567341000  | 8.102203000  | -1.952540000 |
| H | 6.014868000   | 2.492541000  | -0.264658000 |
| H | 5.206499000   | 5.126882000  | -0.208855000 |
| H | 2.486831000   | 4.979813000  | -0.142617000 |

Cartesian coordinates of DFT-optimized structure of **6b** complex by B3LYP/Def2-TZVP;  
6-31G(d,p)/CH<sub>3</sub>CN, charge = 1, multiplicity = 1

|    |              |              |              |
|----|--------------|--------------|--------------|
| Ru | -2.701375000 | -1.586957000 | -0.041974000 |
| N  | -3.359705000 | 0.385480000  | 0.286522000  |
| N  | -2.834636000 | -2.107424000 | 1.985878000  |
| N  | -4.443044000 | -2.650419000 | 0.011433000  |
| N  | -3.321972000 | -1.509563000 | -2.044308000 |
| C  | -1.969629000 | -1.783178000 | 2.967190000  |
| H  | -1.118294000 | -1.186843000 | 2.661398000  |
| C  | -2.141769000 | -2.177854000 | 4.289559000  |
| H  | -1.409720000 | -1.886338000 | 5.034624000  |
| C  | -3.258678000 | -2.943437000 | 4.623983000  |
| H  | -3.425786000 | -3.269699000 | 5.645192000  |
| C  | -4.162210000 | -3.283787000 | 3.621488000  |
| H  | -5.038911000 | -3.875930000 | 3.856594000  |
| C  | -3.939912000 | -2.860366000 | 2.308904000  |
| C  | -4.851594000 | -3.175449000 | 1.190568000  |
| C  | -6.029538000 | -3.925428000 | 1.247836000  |
| H  | -6.374927000 | -4.355986000 | 2.180502000  |
| C  | -6.762375000 | -4.115189000 | 0.074150000  |
| C  | -6.321776000 | -3.564388000 | -1.131343000 |
| H  | -6.893369000 | -3.715638000 | -2.039565000 |
| C  | -5.137534000 | -2.822469000 | -1.137976000 |
| C  | -4.503532000 | -2.166569000 | -2.299498000 |
| C  | -5.045389000 | -2.196460000 | -3.586847000 |
| H  | -5.977297000 | -2.719097000 | -3.768528000 |
| C  | -4.387518000 | -1.555244000 | -4.632532000 |
| H  | -4.803258000 | -1.574759000 | -5.634529000 |
| C  | -3.190078000 | -0.891475000 | -4.366235000 |
| H  | -2.640553000 | -0.377287000 | -5.147052000 |
| C  | -2.695867000 | -0.893258000 | -3.066273000 |
| H  | -1.769694000 | -0.390901000 | -2.813192000 |
| C  | -4.648984000 | 0.772768000  | 0.378048000  |
| H  | -5.380189000 | -0.026553000 | 0.424604000  |
| C  | -5.056136000 | 2.092039000  | 0.401671000  |
| H  | -6.105323000 | 2.352956000  | 0.476407000  |
| C  | -4.077435000 | 3.093062000  | 0.289804000  |
| C  | -2.734713000 | 2.710407000  | 0.204720000  |
| H  | -1.968223000 | 3.456193000  | 0.067729000  |
| C  | -2.376345000 | 1.353983000  | 0.243647000  |
| C  | 5.118369000  | 1.592724000  | -0.609783000 |
| C  | -1.005983000 | 0.817141000  | 0.141453000  |
| C  | 5.130199000  | 2.943566000  | -0.252315000 |
| C  | -1.006439000 | -0.572909000 | -0.088997000 |
| C  | 3.973410000  | 3.594403000  | 0.156264000  |
| C  | 0.192174000  | -1.247413000 | -0.357303000 |
| C  | 2.740607000  | 2.907390000  | 0.247268000  |
| C  | 1.408631000  | -0.560899000 | -0.537053000 |
| C  | 2.687257000  | 1.540791000  | -0.183570000 |
| C  | 1.437354000  | 0.832159000  | -0.157759000 |

|   |              |              |              |
|---|--------------|--------------|--------------|
| C | 3.887653000  | 0.888041000  | -0.626958000 |
| C | 0.234235000  | 1.510510000  | 0.249103000  |
| C | 3.771269000  | -0.443427000 | -1.146650000 |
| C | 0.373392000  | 2.824615000  | 0.804634000  |
| H | 4.634036000  | -0.903008000 | -1.614105000 |
| H | -0.475200000 | 3.284710000  | 1.294399000  |
| C | 2.597680000  | -1.131617000 | -1.099527000 |
| C | 1.561591000  | 3.492735000  | 0.804361000  |
| H | 2.555108000  | -2.111929000 | -1.556696000 |
| H | 1.621344000  | 4.473164000  | 1.262601000  |
| O | -4.519197000 | 4.364934000  | 0.265407000  |
| C | -3.574003000 | 5.444101000  | 0.146099000  |
| C | -4.329194000 | 6.780947000  | 0.174746000  |
| C | -3.275397000 | 7.897637000  | 0.041293000  |
| C | -5.318182000 | 6.855423000  | -1.004036000 |
| C | -5.082579000 | 6.934012000  | 1.509772000  |
| H | -2.860047000 | 5.388792000  | 0.978150000  |
| H | -3.023195000 | 5.334803000  | -0.797170000 |
| H | -3.761415000 | 8.879681000  | 0.055438000  |
| H | -2.718434000 | 7.812940000  | -0.899842000 |
| H | -2.554301000 | 7.868661000  | 0.867223000  |
| H | -4.796108000 | 6.760534000  | -1.964290000 |
| H | -5.843632000 | 7.817434000  | -1.001038000 |
| H | -6.067351000 | 6.059376000  | -0.944505000 |
| H | -4.390813000 | 6.893215000  | 2.360312000  |
| H | -5.826862000 | 6.141721000  | 1.639143000  |
| H | -5.602688000 | 7.898204000  | 1.545855000  |
| H | -7.679013000 | -4.694767000 | 0.098812000  |
| N | 0.001600000  | -2.659365000 | -0.457415000 |
| C | 0.844676000  | -3.732340000 | -0.474991000 |
| C | 0.076047000  | -4.880624000 | -0.473574000 |
| C | -1.256271000 | -4.435335000 | -0.431741000 |
| N | -1.307069000 | -3.101221000 | -0.408955000 |
| H | -2.173477000 | -5.006160000 | -0.404039000 |
| H | 0.432227000  | -5.899607000 | -0.491087000 |
| H | 1.914033000  | -3.614247000 | -0.453244000 |
| N | 4.073255000  | 4.972221000  | 0.504194000  |
| N | 5.099157000  | 5.403187000  | 1.291416000  |
| C | 4.955224000  | 6.726407000  | 1.339254000  |
| C | 3.848296000  | 7.168473000  | 0.579381000  |
| C | 3.309741000  | 6.013760000  | 0.051475000  |
| C | 6.430409000  | 0.975124000  | -0.965729000 |
| C | 6.818680000  | -0.259170000 | -0.419248000 |
| C | 8.084557000  | -0.769533000 | -0.733165000 |
| C | 8.912907000  | -0.019045000 | -1.582145000 |
| C | 8.439347000  | 1.196771000  | -2.054144000 |
| N | 7.231093000  | 1.705431000  | -1.764635000 |
| O | 8.586439000  | -1.934571000 | -0.271356000 |
| C | 7.789418000  | -2.746333000 | 0.608085000  |
| C | 8.587539000  | -3.999008000 | 0.999532000  |
| C | 7.691579000  | -4.833227000 | 1.935654000  |

|   |              |              |              |
|---|--------------|--------------|--------------|
| C | 8.933284000  | -4.820291000 | -0.257088000 |
| C | 9.876523000  | -3.593743000 | 1.739497000  |
| H | 5.649783000  | 7.317088000  | 1.923191000  |
| H | 3.497622000  | 8.179572000  | 0.432138000  |
| H | 2.476186000  | 5.850003000  | -0.614962000 |
| H | 6.151297000  | -0.783344000 | 0.251802000  |
| H | 9.899169000  | -0.386167000 | -1.844735000 |
| H | 9.067258000  | 1.801744000  | -2.706019000 |
| H | 6.860316000  | -3.027384000 | 0.094611000  |
| H | 7.531368000  | -2.163296000 | 1.501786000  |
| H | 7.423783000  | -4.272256000 | 2.839420000  |
| H | 8.215896000  | -5.742863000 | 2.249713000  |
| H | 6.763280000  | -5.136988000 | 1.436508000  |
| H | 8.024603000  | -5.130605000 | -0.787842000 |
| H | 9.486984000  | -5.725515000 | 0.017993000  |
| H | 9.551133000  | -4.241726000 | -0.951196000 |
| H | 9.647828000  | -3.015552000 | 2.643470000  |
| H | 10.525298000 | -2.984345000 | 1.102288000  |
| H | 10.438250000 | -4.484449000 | 2.044092000  |
| H | 6.062014000  | 3.494173000  | -0.285115000 |

Cartesian coordinates of DFT-optimized structure of **1a<sub>ox</sub>** complex by B3LYP/Def2-TZVP;  
6-31G(d,p)/CH<sub>3</sub>CN, charge = 2, multiplicity = 2

|    |              |              |              |
|----|--------------|--------------|--------------|
| Os | 2.191900000  | -0.046596000 | 0.031683000  |
| N  | -7.886651000 | 2.597263000  | -1.795872000 |
| N  | 1.675118000  | -2.076997000 | 0.312582000  |
| N  | 2.651903000  | 0.205856000  | 2.068977000  |
| N  | 4.297253000  | -0.132922000 | 0.094845000  |
| N  | 2.745932000  | -0.439111000 | -1.958566000 |
| N  | -8.195490000 | -1.469563000 | 1.400422000  |
| N  | 1.917681000  | 2.039303000  | -0.283978000 |
| C  | 1.731624000  | 0.368597000  | 3.045442000  |
| H  | 0.695952000  | 0.334499000  | 2.733587000  |
| C  | 2.083138000  | 0.570233000  | 4.373971000  |
| H  | 1.302491000  | 0.698076000  | 5.114905000  |
| C  | 3.432940000  | 0.599164000  | 4.721028000  |
| H  | 3.740087000  | 0.752879000  | 5.749749000  |
| C  | 4.387377000  | 0.423716000  | 3.723191000  |
| H  | 5.442358000  | 0.438372000  | 3.968127000  |
| C  | 3.986147000  | 0.228563000  | 2.402098000  |
| C  | 4.923060000  | 0.027059000  | 1.283735000  |
| C  | 6.316961000  | -0.020171000 | 1.351033000  |
| H  | 6.835679000  | 0.103345000  | 2.293901000  |
| C  | 7.037392000  | -0.235168000 | 0.175072000  |
| C  | 6.372654000  | -0.406214000 | -1.039885000 |
| H  | 6.934659000  | -0.580641000 | -1.949185000 |
| C  | 4.977266000  | -0.351639000 | -1.054275000 |
| C  | 4.093840000  | -0.521827000 | -2.219786000 |
| C  | 4.555792000  | -0.763256000 | -3.513403000 |

|   |              |              |              |
|---|--------------|--------------|--------------|
| H | 5.620801000  | -0.824352000 | -3.701441000 |
| C | 3.648968000  | -0.925434000 | -4.556535000 |
| H | 4.003145000  | -1.112728000 | -5.564329000 |
| C | 2.284784000  | -0.844621000 | -4.280821000 |
| H | 1.539327000  | -0.965426000 | -5.058334000 |
| C | 1.872216000  | -0.603689000 | -2.976785000 |
| H | 0.823227000  | -0.531344000 | -2.720997000 |
| C | -8.614619000 | 3.677713000  | -2.120032000 |
| C | 2.534701000  | -3.116007000 | 0.379736000  |
| H | -9.475363000 | 3.497487000  | -2.761543000 |
| H | 3.587047000  | -2.861269000 | 0.416238000  |
| C | -8.335959000 | 4.968605000  | -1.693578000 |
| C | 2.134510000  | -4.436017000 | 0.394394000  |
| H | -8.958037000 | 5.809034000  | -1.981898000 |
| H | 2.861279000  | -5.237452000 | 0.451011000  |
| C | -7.226480000 | 5.167797000  | -0.857334000 |
| C | 0.762919000  | -4.722467000 | 0.300155000  |
| C | -6.449998000 | 4.054883000  | -0.509500000 |
| C | -0.142046000 | -3.653425000 | 0.236272000  |
| H | -5.600397000 | 4.147021000  | 0.153901000  |
| H | -1.196456000 | -3.842581000 | 0.114257000  |
| C | -6.811995000 | 2.793864000  | -1.009905000 |
| C | 0.318037000  | -2.333166000 | 0.281184000  |
| C | -6.057031000 | 1.568019000  | -0.614470000 |
| C | -0.527018000 | -1.124221000 | 0.194726000  |
| C | -6.803713000 | 0.465151000  | -0.194432000 |
| C | 0.220534000  | 0.054536000  | -0.035331000 |
| C | -6.215757000 | -0.721059000 | 0.246541000  |
| C | -0.380970000 | 1.303384000  | -0.313001000 |
| C | -7.133694000 | -1.829518000 | 0.642640000  |
| C | 0.585530000  | 2.425412000  | -0.337534000 |
| C | -6.944322000 | -3.136019000 | 0.189536000  |
| C | 0.265205000  | 3.776140000  | -0.307638000 |
| H | -6.111690000 | -3.398655000 | -0.453310000 |
| H | -0.761803000 | 4.107323000  | -0.257008000 |
| C | -7.870180000 | -4.130601000 | 0.545107000  |
| C | 1.271644000  | 4.760397000  | -0.299253000 |
| C | -8.960957000 | -3.766949000 | 1.344553000  |
| C | 2.610827000  | 4.350088000  | -0.307939000 |
| H | -9.714001000 | -4.478959000 | 1.657631000  |
| H | 3.437957000  | 5.046927000  | -0.310226000 |
| C | -9.064712000 | -2.429084000 | 1.728280000  |
| C | 2.869648000  | 2.987126000  | -0.283442000 |
| H | -9.908614000 | -2.118796000 | 2.342479000  |
| H | 3.893129000  | 2.632482000  | -0.254671000 |
| C | -4.800741000 | -0.808569000 | 0.312438000  |
| C | -1.780695000 | 1.347487000  | -0.523886000 |
| C | -4.002186000 | 0.289318000  | -0.152489000 |
| C | -2.568075000 | 0.203772000  | -0.122022000 |
| C | -4.643005000 | 1.476404000  | -0.641252000 |
| C | -1.938102000 | -1.017823000 | 0.317442000  |

|   |               |              |              |
|---|---------------|--------------|--------------|
| C | -3.819460000  | 2.501742000  | -1.209885000 |
| C | -2.769993000  | -2.028420000 | 0.898803000  |
| H | -4.291533000  | 3.332932000  | -1.720240000 |
| H | -2.310461000  | -2.867143000 | 1.405612000  |
| C | -2.460816000  | 2.443537000  | -1.148082000 |
| C | -4.128677000  | -1.925841000 | 0.902632000  |
| H | -1.881664000  | 3.216832000  | -1.635889000 |
| H | -4.715891000  | -2.696876000 | 1.386845000  |
| O | -6.999372000  | 6.430742000  | -0.439844000 |
| O | 0.849404000   | 6.030168000  | -0.275454000 |
| O | 0.422445000   | -6.018099000 | 0.271025000  |
| O | -7.630449000  | -5.370619000 | 0.070028000  |
| C | -8.558856000  | -6.426833000 | 0.375928000  |
| C | -8.080577000  | -7.727843000 | -0.284688000 |
| C | -9.107972000  | -8.820289000 | 0.070833000  |
| C | -6.695198000  | -8.120621000 | 0.262362000  |
| C | -8.017013000  | -7.552340000 | -1.813749000 |
| C | -0.965791000  | -6.396214000 | 0.160794000  |
| C | -1.069224000  | -7.927818000 | 0.180635000  |
| C | -2.564279000  | -8.279174000 | 0.051866000  |
| C | -0.290071000  | -8.526582000 | -1.005752000 |
| C | -0.518000000  | -8.477575000 | 1.510074000  |
| C | -5.879074000  | 6.697062000  | 0.421973000  |
| C | -5.858494000  | 8.191373000  | 0.776482000  |
| C | -5.715075000  | 9.038188000  | -0.502331000 |
| C | -7.150891000  | 8.573363000  | 1.523018000  |
| C | -4.641369000  | 8.422667000  | 1.693051000  |
| C | 1.819046000   | 7.101022000  | -0.245314000 |
| C | 1.080984000   | 8.446171000  | -0.206413000 |
| C | 0.207573000   | 8.534409000  | 1.059545000  |
| C | 0.209000000   | 8.609196000  | -1.465848000 |
| C | 2.158440000   | 9.548054000  | -0.173014000 |
| H | -9.553044000  | -6.149748000 | 0.001664000  |
| H | -8.617662000  | -6.548768000 | 1.465457000  |
| H | -10.107828000 | -8.567789000 | -0.302804000 |
| H | -9.177500000  | -8.967018000 | 1.155594000  |
| H | -8.814431000  | -9.775889000 | -0.378151000 |
| H | -6.724709000  | -8.259226000 | 1.350283000  |
| H | -5.947794000  | -7.352696000 | 0.038234000  |
| H | -6.360223000  | -9.062526000 | -0.187264000 |
| H | -8.999630000  | -7.284203000 | -2.221474000 |
| H | -7.697932000  | -8.485511000 | -2.292317000 |
| H | -7.308101000  | -6.766648000 | -2.094081000 |
| H | -1.520382000  | -5.960477000 | 1.001368000  |
| H | -1.368929000  | -5.993617000 | -0.776901000 |
| H | -2.697997000  | -9.366666000 | 0.061464000  |
| H | -2.986368000  | -7.897893000 | -0.885887000 |
| H | -3.147512000  | -7.862532000 | 0.881988000  |
| H | -0.677316000  | -8.152939000 | -1.961725000 |
| H | -0.382711000  | -9.618663000 | -1.009388000 |
| H | 0.774205000   | -8.276655000 | -0.948610000 |

|   |              |              |              |
|---|--------------|--------------|--------------|
| H | -1.068661000 | -8.067418000 | 2.365665000  |
| H | 0.540440000  | -8.227627000 | 1.635624000  |
| H | -0.614959000 | -9.568863000 | 1.540107000  |
| H | -4.953296000 | 6.410486000  | -0.094524000 |
| H | -5.972766000 | 6.091001000  | 1.332448000  |
| H | -4.790281000 | 8.790762000  | -1.038216000 |
| H | -5.682838000 | 10.105063000 | -0.252388000 |
| H | -6.556568000 | 8.873991000  | -1.182897000 |
| H | -8.034176000 | 8.404872000  | 0.898738000  |
| H | -7.130192000 | 9.632426000  | 1.804970000  |
| H | -7.265823000 | 7.983492000  | 2.440979000  |
| H | -3.703098000 | 8.161991000  | 1.187924000  |
| H | -4.710977000 | 7.825348000  | 2.610409000  |
| H | -4.582478000 | 9.477428000  | 1.984447000  |
| H | 2.449785000  | 7.030311000  | -1.140000000 |
| H | 2.449775000  | 6.979225000  | 0.643987000  |
| H | -0.295676000 | 9.506824000  | 1.106620000  |
| H | 0.814285000  | 8.425176000  | 1.966959000  |
| H | -0.560820000 | 7.754310000  | 1.068329000  |
| H | -0.554172000 | 7.826454000  | -1.525088000 |
| H | 0.817525000  | 8.561597000  | -2.377351000 |
| H | -0.300322000 | 9.579582000  | -1.452362000 |
| H | 2.797998000  | 9.457721000  | 0.713339000  |
| H | 1.685051000  | 10.535800000 | -0.145212000 |
| H | 2.799976000  | 9.509145000  | -1.061659000 |
| H | -7.884769000 | 0.536058000  | -0.206819000 |
| H | 8.120607000  | -0.274600000 | 0.206616000  |

Cartesian coordinates of DFT-optimized structure of **2aox** complex by B3LYP/Def2-TZVP;  
6-31G(d,p)/CH<sub>3</sub>CN, charge = 2, multiplicity = 2

|    |             |              |              |
|----|-------------|--------------|--------------|
| Os | 2.165957000 | -0.971767000 | 0.012002000  |
| N  | 0.967734000 | -2.698114000 | 0.209981000  |
| N  | 2.712098000 | -1.057154000 | 2.041885000  |
| N  | 4.116145000 | -1.762367000 | -0.021330000 |
| N  | 2.489032000 | -1.439216000 | -2.013042000 |
| N  | 2.638744000 | 1.092842000  | -0.192092000 |
| C  | 1.909142000 | -0.694685000 | 3.066565000  |
| H  | 0.910073000 | -0.376101000 | 2.798957000  |
| C  | 2.332769000 | -0.721115000 | 4.389080000  |
| H  | 1.648063000 | -0.415089000 | 5.171502000  |
| C  | 3.628852000 | -1.146279000 | 4.676447000  |
| H  | 3.988756000 | -1.180976000 | 5.698945000  |
| C  | 4.458984000 | -1.533302000 | 3.627914000  |
| H  | 5.467733000 | -1.874194000 | 3.826965000  |
| C  | 3.990732000 | -1.484678000 | 2.315571000  |
| C  | 4.788791000 | -1.890317000 | 1.145510000  |
| C  | 6.096848000 | -2.378463000 | 1.146735000  |
| H  | 6.650773000 | -2.489837000 | 2.070855000  |
| C  | 6.681954000 | -2.729528000 | -0.071148000 |

|   |              |              |              |
|---|--------------|--------------|--------------|
| C | 5.965757000  | -2.603473000 | -1.262090000 |
| H | 6.418521000  | -2.888547000 | -2.203929000 |
| C | 4.659573000  | -2.111243000 | -1.209776000 |
| C | 3.733832000  | -1.925926000 | -2.339593000 |
| C | 4.054727000  | -2.231511000 | -3.661741000 |
| H | 5.039300000  | -2.613884000 | -3.901629000 |
| C | 3.109797000  | -2.046585000 | -4.666804000 |
| H | 3.354956000  | -2.281586000 | -5.696821000 |
| C | 1.848790000  | -1.560381000 | -4.324820000 |
| H | 1.078538000  | -1.402612000 | -5.070819000 |
| C | 1.574454000  | -1.272842000 | -2.994063000 |
| H | 0.609674000  | -0.891396000 | -2.686078000 |
| C | 1.409887000  | -3.975075000 | 0.207109000  |
| H | 2.485168000  | -4.106042000 | 0.231438000  |
| C | 0.573033000  | -5.070360000 | 0.167450000  |
| H | 0.973879000  | -6.076890000 | 0.167132000  |
| C | -0.813458000 | -4.854716000 | 0.093247000  |
| C | -1.287137000 | -3.536170000 | 0.107777000  |
| H | -2.342029000 | -3.339993000 | 0.004529000  |
| C | -0.394242000 | -2.462726000 | 0.202910000  |
| C | -5.001180000 | 3.422595000  | -0.459293000 |
| C | -0.762722000 | -1.033901000 | 0.196031000  |
| C | -6.105293000 | 2.644618000  | -0.120943000 |
| C | 0.349398000  | -0.181875000 | 0.015913000  |
| C | -5.943756000 | 1.313961000  | 0.246417000  |
| C | 0.225425000  | 1.210664000  | -0.186617000 |
| C | 1.525099000  | 1.922185000  | -0.175889000 |
| C | 1.698300000  | 3.293234000  | -0.052885000 |
| H | 0.853083000  | 3.957596000  | 0.055288000  |
| C | 2.986767000  | 3.861573000  | -0.019757000 |
| C | 4.097852000  | 3.011965000  | -0.103961000 |
| H | 5.116266000  | 3.375880000  | -0.094608000 |
| C | 3.863369000  | 1.646789000  | -0.170964000 |
| H | 4.697459000  | 0.955676000  | -0.201039000 |
| C | -4.655992000 | 0.733276000  | 0.338099000  |
| C | -1.067419000 | 1.754065000  | -0.378511000 |
| C | -3.522603000 | 1.513214000  | -0.063022000 |
| C | -2.208111000 | 0.935385000  | -0.035400000 |
| C | -3.701395000 | 2.869190000  | -0.491747000 |
| C | -2.050669000 | -0.447520000 | 0.337232000  |
| C | -2.567409000 | 3.581091000  | -0.997771000 |
| C | -3.188486000 | -1.132285000 | 0.872819000  |
| H | -2.713318000 | 4.548685000  | -1.462887000 |
| H | -3.053932000 | -2.097445000 | 1.343200000  |
| C | -1.315399000 | 3.050360000  | -0.938769000 |
| C | -4.430432000 | -0.571031000 | 0.876669000  |
| H | -0.495410000 | 3.599672000  | -1.382555000 |
| H | -5.256642000 | -1.111980000 | 1.322368000  |
| O | 3.035799000  | 5.191924000  | 0.100209000  |
| O | -1.586457000 | -5.945945000 | 0.005670000  |
| C | -3.020721000 | -5.805752000 | -0.078263000 |

|   |              |              |              |
|---|--------------|--------------|--------------|
| C | -3.656085000 | -7.200004000 | -0.175609000 |
| C | -5.181326000 | -6.993822000 | -0.260626000 |
| C | -3.157643000 | -7.920196000 | -1.442876000 |
| C | -3.311797000 | -8.028279000 | 1.076737000  |
| C | 4.318054000  | 5.857698000  | 0.154940000  |
| C | 4.092092000  | 7.365553000  | 0.328933000  |
| C | 3.347095000  | 7.640280000  | 1.648992000  |
| C | 3.287742000  | 7.921867000  | -0.861308000 |
| C | 5.484773000  | 8.025350000  | 0.369986000  |
| H | -3.376954000 | -5.277897000 | 0.815561000  |
| H | -3.268034000 | -5.208721000 | -0.964841000 |
| H | -5.688517000 | -7.962178000 | -0.335672000 |
| H | -5.457830000 | -6.402210000 | -1.141827000 |
| H | -5.567402000 | -6.481355000 | 0.628837000  |
| H | -3.404817000 | -7.347911000 | -2.345591000 |
| H | -3.629103000 | -8.905696000 | -1.530158000 |
| H | -2.072688000 | -8.063998000 | -1.417782000 |
| H | -3.671941000 | -7.535603000 | 1.988295000  |
| H | -2.230909000 | -8.172939000 | 1.172954000  |
| H | -3.782504000 | -9.016478000 | 1.020580000  |
| H | 4.860466000  | 5.650668000  | -0.775593000 |
| H | 4.889910000  | 5.451142000  | 0.997968000  |
| H | 3.204506000  | 8.717992000  | 1.788075000  |
| H | 3.913935000  | 7.262314000  | 2.508765000  |
| H | 2.361011000  | 7.164632000  | 1.655718000  |
| H | 2.297278000  | 7.459545000  | -0.922995000 |
| H | 3.808244000  | 7.740439000  | -1.809721000 |
| H | 3.151146000  | 9.004003000  | -0.754431000 |
| H | 6.084005000  | 7.645887000  | 1.206565000  |
| H | 5.383920000  | 9.109222000  | 0.495015000  |
| H | 6.041944000  | 7.845059000  | -0.557348000 |
| H | -7.095585000 | 3.079217000  | -0.144832000 |
| H | 7.697217000  | -3.109926000 | -0.090914000 |
| N | -5.235725000 | 4.779349000  | -0.803799000 |
| C | -4.587551000 | 5.896481000  | -0.344109000 |
| C | -5.245212000 | 6.986594000  | -0.869972000 |
| C | -6.297899000 | 6.431625000  | -1.635113000 |
| N | -6.302317000 | 5.102100000  | -1.591229000 |
| N | -7.112090000 | 0.571150000  | 0.559333000  |
| N | -8.103583000 | 1.149287000  | 1.297241000  |
| C | -9.080460000 | 0.246516000  | 1.314082000  |
| C | -8.744974000 | -0.915457000 | 0.580023000  |
| C | -7.476582000 | -0.669083000 | 0.102745000  |
| H | -6.826227000 | -1.247305000 | -0.536184000 |
| H | -9.343756000 | -1.799344000 | 0.416057000  |
| H | -9.992329000 | 0.458486000  | 1.857708000  |
| H | -7.049055000 | 6.947816000  | -2.219308000 |
| H | -5.006178000 | 8.028871000  | -0.717710000 |
| H | -3.747036000 | 5.822495000  | 0.329325000  |

Cartesian coordinates of DFT-optimized structure of **3a<sub>ox</sub>** complex by B3LYP/Def2-TZVP;  
6-31G(d,p)/CH<sub>3</sub>CN, charge = 2, multiplicity = 2

|   |              |              |              |
|---|--------------|--------------|--------------|
| C | 4.065967000  | 2.476116000  | -0.136506000 |
| C | 5.422778000  | 2.470428000  | -0.231096000 |
| C | 6.166686000  | 1.252520000  | -0.186931000 |
| C | 5.455415000  | 0.016791000  | -0.038811000 |
| C | 4.020171000  | 0.012803000  | 0.047942000  |
| C | 3.307714000  | 1.272169000  | 0.026407000  |
| C | 6.183763000  | -1.218436000 | 0.014353000  |
| C | 5.454331000  | -2.448405000 | -0.034664000 |
| C | 4.096678000  | -2.463536000 | 0.006080000  |
| C | 3.331930000  | -1.257668000 | 0.137707000  |
| C | 1.899719000  | 1.220570000  | 0.139174000  |
| C | 1.228847000  | -0.009628000 | 0.236749000  |
| C | 1.934804000  | -1.221578000 | 0.284635000  |
| C | 7.578196000  | 1.218079000  | -0.278770000 |
| C | 8.277673000  | 0.027389000  | -0.131338000 |
| C | 7.595084000  | -1.174593000 | 0.034695000  |
| H | 3.564942000  | 3.427251000  | -0.216917000 |
| H | 5.946502000  | 3.412106000  | -0.336576000 |
| H | 3.590005000  | -3.409739000 | -0.118320000 |
| H | 5.993540000  | -3.380610000 | -0.151782000 |
| N | 0.984549000  | 2.315792000  | 0.139808000  |
| N | -0.365423000 | 1.987021000  | 0.043768000  |
| C | -1.045376000 | 3.131248000  | 0.115128000  |
| C | -0.168400000 | 4.215834000  | 0.275397000  |
| C | 1.096311000  | 3.668218000  | 0.299072000  |
| N | 1.063892000  | -2.343458000 | 0.448930000  |
| N | -0.294127000 | -2.103205000 | 0.304114000  |
| C | -0.915903000 | -3.254942000 | 0.581848000  |
| C | 0.012415000  | -4.244895000 | 0.930457000  |
| C | 1.248236000  | -3.632328000 | 0.853388000  |
| N | 8.336014000  | 2.403876000  | -0.482521000 |
| N | 9.412655000  | 2.661901000  | 0.314205000  |
| C | 9.951859000  | 3.765919000  | -0.197504000 |
| C | 8.217943000  | 3.322213000  | -1.491874000 |
| C | 9.245913000  | 4.226405000  | -1.333125000 |
| N | 8.367029000  | -2.355304000 | 0.186778000  |
| N | 9.478916000  | -2.540897000 | -0.582232000 |
| C | 10.019434000 | -3.667094000 | -0.125241000 |
| C | 9.279535000  | -4.216249000 | 0.948411000  |
| C | 8.228922000  | -3.343642000 | 1.126922000  |
| C | -0.095024000 | -0.098929000 | -2.911658000 |
| C | -0.361185000 | -0.192575000 | -4.271952000 |
| C | -1.682702000 | -0.317859000 | -4.695803000 |
| C | -2.696156000 | -0.342664000 | -3.741397000 |
| C | -2.379089000 | -0.247271000 | -2.387323000 |
| N | -1.071561000 | -0.130809000 | -1.979286000 |
| C | -3.383924000 | -0.249710000 | -1.310457000 |
| N | -2.839780000 | -0.155542000 | -0.077633000 |

|    |              |              |              |
|----|--------------|--------------|--------------|
| C  | -3.592890000 | -0.112160000 | 1.043390000  |
| C  | -4.984338000 | -0.183145000 | 0.951610000  |
| C  | -5.567047000 | -0.291855000 | -0.311667000 |
| C  | -4.770748000 | -0.321061000 | -1.457080000 |
| C  | -2.791445000 | 0.028937000  | 2.271642000  |
| N  | -1.431628000 | 0.109641000  | 2.086195000  |
| C  | -0.631005000 | 0.266178000  | 3.162340000  |
| C  | -1.130119000 | 0.334016000  | 4.457226000  |
| C  | -2.506302000 | 0.245686000  | 4.656953000  |
| C  | -3.339570000 | 0.094856000  | 3.551652000  |
| H  | 0.917060000  | -0.002513000 | -2.541263000 |
| H  | 0.462391000  | -0.165614000 | -4.975956000 |
| H  | -1.924099000 | -0.393508000 | -5.750379000 |
| H  | -3.730934000 | -0.438383000 | -4.046597000 |
| H  | -5.605236000 | -0.148830000 | 1.838173000  |
| H  | -5.226239000 | -0.390987000 | -2.437100000 |
| H  | 0.430763000  | 0.329014000  | 2.963757000  |
| H  | -0.441587000 | 0.455266000  | 5.285328000  |
| H  | -2.927923000 | 0.295847000  | 5.654896000  |
| H  | -4.412730000 | 0.028620000  | 3.682558000  |
| Os | -0.745640000 | -0.063962000 | 0.101224000  |
| H  | -2.124194000 | 3.117811000  | 0.059050000  |
| H  | -0.423015000 | 5.260057000  | 0.371643000  |
| H  | 2.042056000  | 4.153481000  | 0.455045000  |
| H  | -1.993350000 | -3.309336000 | 0.524419000  |
| H  | -0.187814000 | -5.267407000 | 1.210789000  |
| H  | 2.222753000  | -4.019421000 | 1.094443000  |
| H  | 10.827935000 | 4.196931000  | 0.270179000  |
| H  | 7.443997000  | 3.239828000  | -2.240555000 |
| H  | 9.459381000  | 5.086877000  | -1.950181000 |
| H  | 10.921168000 | -4.050333000 | -0.585646000 |
| H  | 9.486826000  | -5.112680000 | 1.514169000  |
| H  | 7.425486000  | -3.326112000 | 1.847987000  |
| H  | 9.359407000  | 0.031419000  | -0.155277000 |
| H  | -6.646051000 | -0.346372000 | -0.404116000 |

Cartesian coordinates of DFT-optimized structure of **4a<sub>ox</sub>** complex by B3LYP/Def2-TZVP;  
6-31G(d,p)/CH<sub>3</sub>CN, charge = 2, multiplicity = 2

|    |              |              |              |
|----|--------------|--------------|--------------|
| Os | 1.790862000  | -3.056808000 | 0.026577000  |
| N  | -1.561513000 | 6.817513000  | -1.668648000 |
| N  | -0.164209000 | -3.703618000 | 0.439352000  |
| N  | 2.418142000  | -3.263811000 | 2.027576000  |
| N  | 2.849307000  | -4.879283000 | 0.043162000  |
| N  | 1.683125000  | -3.726837000 | -1.968596000 |
| N  | -5.213434000 | 4.776221000  | 1.374500000  |
| N  | 3.318876000  | -1.677811000 | -0.390527000 |
| C  | 2.157521000  | -2.372578000 | 3.008852000  |
| H  | 1.583634000  | -1.500702000 | 2.723556000  |

|   |              |              |              |
|---|--------------|--------------|--------------|
| C | 2.593014000  | -2.554635000 | 4.315480000  |
| H | 2.353761000  | -1.806364000 | 5.062171000  |
| C | 3.326084000  | -3.696504000 | 4.632404000  |
| H | 3.679865000  | -3.868494000 | 5.643079000  |
| C | 3.599472000  | -4.619664000 | 3.627040000  |
| H | 4.168394000  | -5.514582000 | 3.847082000  |
| C | 3.141184000  | -4.392568000 | 2.330021000  |
| C | 3.385938000  | -5.311011000 | 1.205212000  |
| C | 4.087192000  | -6.517824000 | 1.244523000  |
| H | 4.524053000  | -6.880738000 | 2.166740000  |
| C | 4.217412000  | -7.254734000 | 0.066895000  |
| C | 3.655329000  | -6.790305000 | -1.122771000 |
| H | 3.758243000  | -7.363526000 | -2.035838000 |
| C | 2.962899000  | -5.577822000 | -1.107790000 |
| C | 2.300423000  | -4.922463000 | -2.248347000 |
| C | 2.278534000  | -5.451185000 | -3.538276000 |
| H | 2.770472000  | -6.394630000 | -3.741180000 |
| C | 1.625650000  | -4.766394000 | -4.559366000 |
| H | 1.605641000  | -5.173556000 | -5.564373000 |
| C | 1.002768000  | -3.555079000 | -4.265414000 |
| H | 0.481468000  | -2.983891000 | -5.024838000 |
| C | 1.052389000  | -3.068292000 | -2.965146000 |
| H | 0.581902000  | -2.131587000 | -2.696777000 |
| C | -1.069600000 | 8.027441000  | -1.979649000 |
| C | -0.858471000 | -4.839929000 | 0.531166000  |
| H | -1.685383000 | 8.637413000  | -2.638141000 |
| C | 0.142835000  | 8.522713000  | -1.521245000 |
| H | 0.496575000  | 9.508870000  | -1.801963000 |
| C | 0.908484000  | 7.718074000  | -0.663114000 |
| C | 0.414599000  | 6.451105000  | -0.325440000 |
| H | 0.949176000  | 5.802361000  | 0.355970000  |
| C | -0.816710000 | 6.040482000  | -0.860902000 |
| N | -1.092118000 | -2.671681000 | 0.455158000  |
| C | -1.417027000 | 4.724837000  | -0.488027000 |
| C | -0.580930000 | -1.353682000 | 0.285126000  |
| C | -2.759338000 | 4.720708000  | -0.105964000 |
| C | 0.796142000  | -1.356019000 | 0.004989000  |
| C | -3.427794000 | 3.563460000  | 0.297921000  |
| C | 1.472656000  | -0.161536000 | -0.294842000 |
| C | -4.875997000 | 3.695337000  | 0.633853000  |
| N | 2.874086000  | -0.364076000 | -0.438738000 |
| C | -5.825051000 | 2.798907000  | 0.140295000  |
| H | -5.542579000 | 1.962606000  | -0.489158000 |
| C | -7.183051000 | 2.998377000  | 0.436863000  |
| C | -7.536242000 | 4.106643000  | 1.216700000  |
| H | -8.562623000 | 4.325679000  | 1.482448000  |
| C | -6.509978000 | 4.950799000  | 1.643776000  |
| C | 4.651369000  | -1.629686000 | -0.449528000 |
| H | -6.759015000 | 5.824296000  | 2.244303000  |
| C | -2.710579000 | 2.342962000  | 0.374148000  |
| C | 0.769779000  | 1.047450000  | -0.450744000 |

|   |               |              |              |
|---|---------------|--------------|--------------|
| C | -1.341927000  | 2.298742000  | -0.058952000 |
| C | -0.616547000  | 1.058890000  | -0.036461000 |
| C | -0.702693000  | 3.500847000  | -0.515865000 |
| C | -1.292411000  | -0.144689000 | 0.398614000  |
| C | 0.620141000   | 3.402402000  | -1.057757000 |
| C | -2.610631000  | -0.026872000 | 0.947009000  |
| H | 1.060618000   | 4.271239000  | -1.531578000 |
| H | -3.065220000  | -0.876468000 | 1.438417000  |
| C | 1.322659000   | 2.238536000  | -1.023327000 |
| C | -3.280918000  | 1.156303000  | 0.939365000  |
| H | 2.292973000   | 2.203695000  | -1.500487000 |
| H | -4.261653000  | 1.210318000  | 1.395886000  |
| O | 2.070148000   | 8.240673000  | -0.218336000 |
| O | -8.045919000  | 2.094195000  | -0.071587000 |
| C | -9.454471000  | 2.257163000  | 0.173208000  |
| C | -10.220427000 | 1.110878000  | -0.503138000 |
| C | -11.718277000 | 1.336825000  | -0.219242000 |
| C | -9.777779000  | -0.241513000 | 0.087065000  |
| C | -9.972182000  | 1.132847000  | -2.023290000 |
| C | 2.903656000   | 7.464055000  | 0.659590000  |
| C | 4.156405000   | 8.277945000  | 1.016023000  |
| C | 4.951671000   | 8.612224000  | -0.260278000 |
| C | 3.754594000   | 9.574160000  | 1.745022000  |
| C | 5.015711000   | 7.402426000  | 1.948842000  |
| H | -9.778349000  | 3.225765000  | -0.229544000 |
| H | -9.634096000  | 2.251887000  | 1.256245000  |
| H | -12.063334000 | 2.294469000  | -0.627909000 |
| H | -11.928404000 | 1.330856000  | 0.857190000  |
| H | -12.314651000 | 0.541738000  | -0.681066000 |
| H | -9.961493000  | -0.279794000 | 1.168031000  |
| H | -8.710699000  | -0.417951000 | -0.082332000 |
| H | -10.336242000 | -1.062412000 | -0.377611000 |
| H | -10.289625000 | 2.087420000  | -2.461117000 |
| H | -10.539281000 | 0.333262000  | -2.513929000 |
| H | -8.911898000  | 0.988941000  | -2.254530000 |
| H | 3.183465000   | 6.529451000  | 0.155604000  |
| H | 2.337843000   | 7.215418000  | 1.566971000  |
| H | 5.255740000   | 7.698902000  | -0.786708000 |
| H | 5.859335000   | 9.172673000  | -0.008146000 |
| H | 4.357714000   | 9.219947000  | -0.950332000 |
| H | 3.127166000   | 10.208127000 | 1.110355000  |
| H | 4.646250000   | 10.147857000 | 2.023245000  |
| H | 3.196571000   | 9.353850000  | 2.663618000  |
| H | 5.319059000   | 6.470228000  | 1.456727000  |
| H | 4.473953000   | 7.142200000  | 2.866436000  |
| H | 5.925997000   | 7.939257000  | 2.238939000  |
| H | -3.306870000  | 5.655524000  | -0.123229000 |
| H | 4.758788000   | -8.194251000 | 0.076186000  |
| C | 3.951563000   | 0.472746000  | -0.494649000 |
| C | 5.094969000   | -0.298603000 | -0.517904000 |
| C | -2.349137000  | -3.200251000 | 0.523946000  |

|   |              |              |              |
|---|--------------|--------------|--------------|
| C | -2.236312000 | -4.573640000 | 0.588022000  |
| H | -0.337358000 | -5.786263000 | 0.542545000  |
| H | 5.221800000  | -2.547030000 | -0.429398000 |
| H | 3.839186000  | 1.542840000  | -0.481390000 |
| H | 6.113789000  | 0.053363000  | -0.568300000 |
| H | -3.227678000 | -2.580082000 | 0.490150000  |
| H | -3.042181000 | -5.287922000 | 0.657101000  |

Cartesian coordinates of DFT-optimized structure of **5a<sub>ox</sub>** complex by B3LYP/Def2-TZVP;  
6-31G(d,p)/CH<sub>3</sub>CN, charge = 2, multiplicity = 2

|    |              |              |              |
|----|--------------|--------------|--------------|
| Os | 1.883703000  | -2.975778000 | 0.009239000  |
| N  | -0.081111000 | -3.668440000 | 0.311749000  |
| N  | 2.339809000  | -3.289725000 | 2.041168000  |
| N  | 3.062340000  | -4.713196000 | -0.004756000 |
| N  | 1.777721000  | -3.636564000 | -1.985557000 |
| N  | -5.131675000 | 4.877333000  | 1.362798000  |
| C  | 1.882964000  | -2.528689000 | 3.059358000  |
| H  | 1.204983000  | -1.729384000 | 2.789779000  |
| C  | 2.261385000  | -2.746176000 | 4.378163000  |
| H  | 1.869721000  | -2.101292000 | 5.156195000  |
| C  | 3.134681000  | -3.793407000 | 4.666971000  |
| H  | 3.447727000  | -3.990845000 | 5.686418000  |
| C  | 3.598233000  | -4.592923000 | 3.625305000  |
| H  | 4.270210000  | -5.417997000 | 3.827818000  |
| C  | 3.194178000  | -4.332709000 | 2.316943000  |
| C  | 3.611244000  | -5.137576000 | 1.155408000  |
| C  | 4.462904000  | -6.243967000 | 1.159200000  |
| H  | 4.912706000  | -6.600195000 | 2.077772000  |
| C  | 4.724604000  | -6.891402000 | -0.049617000 |
| C  | 4.134233000  | -6.446144000 | -1.233298000 |
| H  | 4.330065000  | -6.958207000 | -2.167486000 |
| C  | 3.288023000  | -5.336221000 | -1.182871000 |
| C  | 2.549982000  | -4.729951000 | -2.304155000 |
| C  | 2.584165000  | -5.219690000 | -3.608880000 |
| H  | 3.194263000  | -6.083261000 | -3.843992000 |
| C  | 1.830962000  | -4.600512000 | -4.602776000 |
| H  | 1.855730000  | -4.976630000 | -5.619758000 |
| C  | 1.044271000  | -3.499738000 | -4.267412000 |
| H  | 0.437252000  | -2.988536000 | -5.005555000 |
| C  | 1.038773000  | -3.050962000 | -2.952906000 |
| H  | 0.442586000  | -2.200512000 | -2.648411000 |
| C  | -0.456839000 | -4.965906000 | 0.370727000  |
| H  | 0.346551000  | -5.692324000 | 0.384872000  |
| C  | -1.771672000 | -5.377106000 | 0.401551000  |
| H  | -2.024601000 | -6.429453000 | 0.448900000  |
| C  | -2.782394000 | -4.402791000 | 0.335830000  |
| C  | -2.409779000 | -3.053503000 | 0.285434000  |
| H  | -3.163175000 | -2.289467000 | 0.185303000  |
| C  | -1.059029000 | -2.687464000 | 0.310231000  |

|   |               |              |              |
|---|---------------|--------------|--------------|
| C | -1.336507000  | 4.788597000  | -0.468379000 |
| C | -0.537131000  | -1.308685000 | 0.236878000  |
| C | -2.676230000  | 4.816557000  | -0.092710000 |
| C | 0.853841000   | -1.281824000 | 0.003733000  |
| C | -3.353347000  | 3.657532000  | 0.285434000  |
| C | 1.538117000   | -0.084841000 | -0.252453000 |
| C | -4.801513000  | 3.797751000  | 0.617431000  |
| C | -5.755604000  | 2.912014000  | 0.114855000  |
| H | -5.477620000  | 2.077701000  | -0.519052000 |
| C | -7.113442000  | 3.123060000  | 0.405820000  |
| C | -7.459176000  | 4.228401000  | 1.193238000  |
| H | -8.484217000  | 4.454753000  | 1.458057000  |
| C | -6.427303000  | 5.060850000  | 1.629690000  |
| H | -6.670917000  | 5.932178000  | 2.235446000  |
| C | -2.643289000  | 2.428993000  | 0.354054000  |
| C | 0.841621000   | 1.123426000  | -0.426853000 |
| C | -1.271712000  | 2.378097000  | -0.063960000 |
| C | -0.553278000  | 1.133982000  | -0.042551000 |
| C | -0.618305000  | 3.573978000  | -0.510698000 |
| C | -1.232217000  | -0.072902000 | 0.360044000  |
| C | 0.710725000   | 3.480165000  | -1.035064000 |
| C | -2.548260000  | 0.055410000  | 0.909853000  |
| H | 1.159311000   | 4.349133000  | -1.501436000 |
| H | -3.005247000  | -0.794929000 | 1.398369000  |
| C | 1.408421000   | 2.313591000  | -0.989249000 |
| C | -3.218498000  | 1.241757000  | 0.907448000  |
| H | 2.387372000   | 2.275593000  | -1.448899000 |
| H | -4.200095000  | 1.295163000  | 1.362714000  |
| O | -4.044361000  | -4.851782000 | 0.317615000  |
| O | -7.983454000  | 2.233128000  | -0.115233000 |
| C | -9.391762000  | 2.418018000  | 0.116564000  |
| C | -10.173358000 | 1.296054000  | -0.582326000 |
| C | -11.668646000 | 1.549316000  | -0.307459000 |
| C | -9.764675000  | -0.072617000 | -0.005518000 |
| C | -9.910674000  | 1.332568000  | -2.099626000 |
| C | -5.142024000  | -3.916718000 | 0.257253000  |
| C | -6.463730000  | -4.697708000 | 0.263812000  |
| C | -7.600226000  | -3.658526000 | 0.201543000  |
| C | -6.536427000  | -5.623166000 | -0.965523000 |
| C | -6.584776000  | -5.523633000 | 1.558605000  |
| H | -9.693076000  | 3.397846000  | -0.276402000 |
| H | -9.582914000  | 2.401394000  | 1.197452000  |
| H | -11.990475000 | 2.519250000  | -0.705791000 |
| H | -11.886589000 | 1.533716000  | 0.767384000  |
| H | -12.277271000 | 0.772670000  | -0.784029000 |
| H | -9.955010000  | -0.118686000 | 1.074001000  |
| H | -8.701253000  | -0.272969000 | -0.171696000 |
| H | -10.339944000 | -0.874761000 | -0.482254000 |
| H | -10.207139000 | 2.297854000  | -2.528419000 |
| H | -10.487140000 | 0.549179000  | -2.605228000 |
| H | -8.850956000  | 1.172891000  | -2.323043000 |

|   |              |              |              |
|---|--------------|--------------|--------------|
| H | -5.083335000 | -3.246550000 | 1.124149000  |
| H | -5.050851000 | -3.320486000 | -0.659360000 |
| H | -8.572852000 | -4.163142000 | 0.205518000  |
| H | -7.541112000 | -3.052647000 | -0.710752000 |
| H | -7.571319000 | -2.980688000 | 1.063307000  |
| H | -6.463300000 | -5.048728000 | -1.897244000 |
| H | -7.489198000 | -6.164672000 | -0.978347000 |
| H | -5.727468000 | -6.360727000 | -0.956194000 |
| H | -6.545469000 | -4.878039000 | 2.444658000  |
| H | -5.778316000 | -6.259715000 | 1.637814000  |
| H | -7.539086000 | -6.062305000 | 1.577680000  |
| H | -3.203407000 | 5.762232000  | -0.097683000 |
| H | 5.385338000  | -7.750998000 | -0.067776000 |
| N | 2.952234000  | -0.269976000 | -0.353222000 |
| C | 4.014636000  | 0.579765000  | -0.340384000 |
| C | 5.175136000  | -0.174313000 | -0.352157000 |
| C | 4.750733000  | -1.508009000 | -0.347529000 |
| N | 3.412066000  | -1.575475000 | -0.334342000 |
| N | -0.725437000 | 6.020353000  | -0.829348000 |
| C | 0.453658000  | 6.547768000  | -0.372574000 |
| C | 0.568851000  | 7.807540000  | -0.919172000 |
| C | -0.604246000 | 7.966980000  | -1.692987000 |
| N | -1.391805000 | 6.895666000  | -1.635515000 |
| H | 5.332666000  | -2.418379000 | -0.344717000 |
| H | 6.188725000  | 0.195623000  | -0.356038000 |
| H | 3.884606000  | 1.647350000  | -0.292354000 |
| H | 1.085693000  | 6.002422000  | 0.312177000  |
| H | 1.375765000  | 8.510889000  | -0.774318000 |
| H | -0.903997000 | 8.816950000  | -2.292814000 |

Cartesian coordinates of DFT-optimized structure of **6a<sub>ox</sub>** complex by B3LYP/Def2-TZVP; 6-31G(d,p)/CH<sub>3</sub>CN, charge = 2, multiplicity = 2

|    |              |              |              |
|----|--------------|--------------|--------------|
| Os | 1.841355000  | -2.463836000 | -0.313701000 |
| N  | -0.063457000 | -3.210305000 | 0.185598000  |
| N  | 2.424576000  | -2.505241000 | 1.709002000  |
| N  | 3.102170000  | -4.138093000 | -0.191372000 |
| N  | 1.667660000  | -3.360851000 | -2.208633000 |
| C  | 1.990249000  | -1.642866000 | 2.653784000  |
| H  | 1.263715000  | -0.908722000 | 2.330597000  |
| C  | 2.448369000  | -1.683248000 | 3.964524000  |
| H  | 2.071075000  | -0.963068000 | 4.681160000  |
| C  | 3.380762000  | -2.654526000 | 4.325313000  |
| H  | 3.756253000  | -2.714472000 | 5.341046000  |
| C  | 3.822429000  | -3.557229000 | 3.361440000  |
| H  | 4.538985000  | -4.326702000 | 3.621730000  |
| C  | 3.337917000  | -3.473680000 | 2.057120000  |
| C  | 3.728136000  | -4.398279000 | 0.978271000  |
| C  | 4.625436000  | -5.464449000 | 1.065677000  |
| H  | 5.137099000  | -5.690198000 | 1.993278000  |

|   |              |              |              |
|---|--------------|--------------|--------------|
| C | 4.849620000  | -6.245575000 | -0.069377000 |
| C | 4.180274000  | -5.968775000 | -1.262251000 |
| H | 4.345830000  | -6.585607000 | -2.137045000 |
| C | 3.293602000  | -4.890300000 | -1.297989000 |
| C | 2.476353000  | -4.449448000 | -2.441600000 |
| C | 2.475106000  | -5.082374000 | -3.683813000 |
| H | 3.118718000  | -5.936924000 | -3.853670000 |
| C | 1.644976000  | -4.615785000 | -4.699630000 |
| H | 1.641458000  | -5.103875000 | -5.668132000 |
| C | 0.818825000  | -3.521510000 | -4.448229000 |
| H | 0.151208000  | -3.127056000 | -5.205416000 |
| C | 0.853862000  | -2.924691000 | -3.194466000 |
| H | 0.230886000  | -2.072272000 | -2.955942000 |
| C | -0.367027000 | -4.507421000 | 0.417244000  |
| H | 0.472674000  | -5.189926000 | 0.471375000  |
| C | -1.655703000 | -4.972314000 | 0.568952000  |
| H | -1.849792000 | -6.022105000 | 0.753186000  |
| C | -2.718871000 | -4.061770000 | 0.442431000  |
| C | -2.420368000 | -2.712620000 | 0.212838000  |
| H | -3.215687000 | -2.001010000 | 0.061743000  |
| C | -1.091095000 | -2.284108000 | 0.124763000  |
| C | -1.806018000 | 5.070106000  | -1.398715000 |
| C | -0.648343000 | -0.899976000 | -0.132318000 |
| C | -3.134522000 | 5.042002000  | -0.967919000 |
| C | 0.723604000  | -0.833069000 | -0.453672000 |
| C | -3.697029000 | 3.895690000  | -0.420133000 |
| C | 1.327291000  | 0.360480000  | -0.874955000 |
| C | -2.931850000 | 2.718192000  | -0.252085000 |
| C | 0.559752000  | 1.511946000  | -1.123992000 |
| C | -1.590352000 | 2.698373000  | -0.756015000 |
| C | -0.809297000 | 1.496566000  | -0.656893000 |
| C | -1.033276000 | 3.882746000  | -1.345758000 |
| C | -1.399036000 | 0.307343000  | -0.092708000 |
| C | 0.270355000  | 3.792639000  | -1.935050000 |
| C | -2.683783000 | 0.428147000  | 0.529597000  |
| H | 0.649038000  | 4.632583000  | -2.504828000 |
| H | -3.061834000 | -0.389190000 | 1.129304000  |
| C | 1.029411000  | 2.668804000  | -1.826794000 |
| C | -3.415692000 | 1.574350000  | 0.455050000  |
| H | 1.980841000  | 2.633514000  | -2.341029000 |
| H | -4.368588000 | 1.631120000  | 0.967661000  |
| O | -3.955432000 | -4.566533000 | 0.545406000  |
| C | -5.100648000 | -3.697900000 | 0.411178000  |
| C | -6.380947000 | -4.524806000 | 0.595099000  |
| C | -7.568327000 | -3.554574000 | 0.438455000  |
| C | -6.460786000 | -5.623487000 | -0.481789000 |
| C | -6.405906000 | -5.155417000 | 2.000491000  |
| H | -5.037891000 | -2.908388000 | 1.170610000  |
| H | -5.079127000 | -3.235784000 | -0.583722000 |
| H | -8.514188000 | -4.094290000 | 0.559256000  |
| H | -7.574531000 | -3.085127000 | -0.552783000 |

|   |              |              |              |
|---|--------------|--------------|--------------|
| H | -7.538004000 | -2.758618000 | 1.192362000  |
| H | -6.457043000 | -5.190212000 | -1.489614000 |
| H | -7.385153000 | -6.201268000 | -0.367940000 |
| H | -5.616497000 | -6.316261000 | -0.406024000 |
| H | -6.358481000 | -4.385068000 | 2.780100000  |
| H | -5.562466000 | -5.838151000 | 2.145338000  |
| H | -7.331575000 | -5.723884000 | 2.145998000  |
| H | 5.542961000  | -7.077957000 | -0.021524000 |
| N | 2.741814000  | 0.231785000  | -1.039616000 |
| C | 3.757588000  | 1.125853000  | -1.182722000 |
| C | 4.953659000  | 0.429896000  | -1.179955000 |
| C | 4.600856000  | -0.913087000 | -1.004185000 |
| N | 3.270289000  | -1.040925000 | -0.905535000 |
| H | 5.230066000  | -1.788794000 | -0.936432000 |
| H | 5.944684000  | 0.843725000  | -1.284290000 |
| H | 3.575558000  | 2.184885000  | -1.245841000 |
| N | -5.056978000 | 3.953574000  | -0.011429000 |
| N | -5.515166000 | 5.045535000  | 0.665463000  |
| C | -6.821708000 | 4.833066000  | 0.802505000  |
| C | -7.228423000 | 3.615593000  | 0.208454000  |
| C | -6.069654000 | 3.080577000  | -0.311023000 |
| C | -1.288298000 | 6.373594000  | -1.911451000 |
| C | -0.056032000 | 6.882968000  | -1.472411000 |
| C | 0.356154000  | 8.140459000  | -1.933249000 |
| C | -0.486512000 | 8.833675000  | -2.816036000 |
| C | -1.691315000 | 8.245588000  | -3.174155000 |
| N | -2.107550000 | 7.044937000  | -2.741285000 |
| O | 1.506204000  | 8.753561000  | -1.585419000 |
| C | 2.406822000  | 8.099826000  | -0.673959000 |
| C | 3.616369000  | 9.011296000  | -0.418465000 |
| C | 4.547350000  | 8.264722000  | 0.556755000  |
| C | 4.360213000  | 9.287669000  | -1.738795000 |
| C | 3.153727000  | 10.336177000 | 0.217018000  |
| H | -7.427387000 | 5.560154000  | 1.328405000  |
| H | -8.221581000 | 3.193683000  | 0.159431000  |
| H | -5.887404000 | 2.182459000  | -0.881859000 |
| H | 0.541403000  | 6.318026000  | -0.769192000 |
| H | -0.196772000 | 9.809181000  | -3.191280000 |
| H | -2.365763000 | 8.768903000  | -3.849414000 |
| H | 2.729388000  | 7.145473000  | -1.110970000 |
| H | 1.879782000  | 7.892965000  | 0.266526000  |
| H | 4.043463000  | 8.049823000  | 1.507086000  |
| H | 5.431081000  | 8.874096000  | 0.777085000  |
| H | 4.893208000  | 7.314103000  | 0.132623000  |
| H | 4.709438000  | 8.354569000  | -2.198145000 |
| H | 5.236301000  | 9.921203000  | -1.557960000 |
| H | 3.713418000  | 9.799355000  | -2.458564000 |
| H | 2.628827000  | 10.158059000 | 1.163880000  |
| H | 2.476650000  | 10.880887000 | -0.448700000 |
| H | 4.015443000  | 10.980293000 | 0.427057000  |
| H | -3.740115000 | 5.935145000  | -1.055910000 |

Cartesian coordinates of DFT-optimized structure of **1box** complex by B3LYP/Def2-TZVP;  
6-31G(d,p)/CH<sub>3</sub>CN, charge = 2, multiplicity = 2

|    |              |              |              |
|----|--------------|--------------|--------------|
| Ru | 1.784655000  | -3.014718000 | 0.016152000  |
| N  | -1.637184000 | 6.819290000  | -1.660949000 |
| N  | -0.174306000 | -3.736029000 | 0.291244000  |
| N  | 2.249667000  | -3.289295000 | 2.049453000  |
| N  | 2.904102000  | -4.800980000 | 0.041808000  |
| N  | 1.758493000  | -3.655396000 | -1.987596000 |
| N  | -5.184153000 | 4.757752000  | 1.511248000  |
| N  | 3.370115000  | -1.640525000 | -0.282687000 |
| C  | 1.852450000  | -2.465907000 | 3.038743000  |
| H  | 1.232331000  | -1.628814000 | 2.744325000  |
| C  | 2.214314000  | -2.667705000 | 4.366769000  |
| H  | 1.869104000  | -1.972779000 | 5.123515000  |
| C  | 3.012512000  | -3.762761000 | 4.688810000  |
| H  | 3.313183000  | -3.949550000 | 5.714110000  |
| C  | 3.419844000  | -4.623096000 | 3.671830000  |
| H  | 4.037760000  | -5.483234000 | 3.899170000  |
| C  | 3.029476000  | -4.374559000 | 2.356581000  |
| C  | 3.400140000  | -5.236939000 | 1.216350000  |
| C  | 4.168939000  | -6.402922000 | 1.259518000  |
| H  | 4.575858000  | -6.774071000 | 2.192198000  |
| C  | 4.403042000  | -7.089771000 | 0.067119000  |
| C  | 3.874373000  | -6.622334000 | -1.136889000 |
| H  | 4.055061000  | -7.161862000 | -2.058443000 |
| C  | 3.111483000  | -5.451671000 | -1.119605000 |
| C  | 2.457739000  | -4.800414000 | -2.272161000 |
| C  | 2.516127000  | -5.296040000 | -3.574165000 |
| H  | 3.071769000  | -6.202103000 | -3.783541000 |
| C  | 1.856976000  | -4.624077000 | -4.600716000 |
| H  | 1.898742000  | -5.003696000 | -5.615908000 |
| C  | 1.146254000  | -3.464471000 | -4.300162000 |
| H  | 0.616016000  | -2.907493000 | -5.063986000 |
| C  | 1.119084000  | -3.013507000 | -2.984441000 |
| H  | 0.580404000  | -2.116180000 | -2.708116000 |
| C  | -1.148826000 | 8.025515000  | -1.990428000 |
| C  | -0.547907000 | -5.029694000 | 0.333366000  |
| H  | -1.786400000 | 8.641465000  | -2.622109000 |
| H  | 0.253847000  | -5.757973000 | 0.370404000  |
| C  | 0.086415000  | 8.509880000  | -1.583657000 |
| C  | -1.865773000 | -5.442207000 | 0.321939000  |
| H  | 0.437313000  | 9.492427000  | -1.880174000 |
| H  | -2.121115000 | -6.494511000 | 0.357635000  |
| C  | 0.880118000  | 7.698093000  | -0.758434000 |
| C  | -2.872012000 | -4.467267000 | 0.225958000  |
| C  | 0.387343000  | 6.437376000  | -0.396609000 |
| C  | -2.496020000 | -3.116483000 | 0.193962000  |
| H  | 0.942225000  | 5.785870000  | 0.265460000  |

|   |               |              |              |
|---|---------------|--------------|--------------|
| H | -3.243574000  | -2.348323000 | 0.076727000  |
| C | -0.866593000  | 6.035353000  | -0.884344000 |
| C | -1.144979000  | -2.760393000 | 0.263652000  |
| C | -1.458191000  | 4.720895000  | -0.495505000 |
| C | -0.611700000  | -1.383939000 | 0.207611000  |
| C | -2.790683000  | 4.717562000  | -0.076955000 |
| C | 0.781238000   | -1.341564000 | -0.018162000 |
| C | -3.448680000  | 3.560276000  | 0.341247000  |
| C | 1.485390000   | -0.145334000 | -0.271068000 |
| C | -4.883673000  | 3.695176000  | 0.729219000  |
| C | 2.955010000   | -0.320991000 | -0.298677000 |
| C | -5.857645000  | 2.821275000  | 0.244036000  |
| C | 3.898848000   | 0.696063000  | -0.238812000 |
| H | -5.604376000  | 2.000235000  | -0.417259000 |
| H | 3.604600000   | 1.732481000  | -0.158744000 |
| C | -7.203141000  | 3.026683000  | 0.590523000  |
| C | 5.275770000   | 0.402695000  | -0.237248000 |
| C | -7.517343000  | 4.113227000  | 1.416310000  |
| C | 5.676282000   | -0.938553000 | -0.284349000 |
| H | -8.531171000  | 4.333482000  | 1.725676000  |
| H | 6.714951000   | -1.240258000 | -0.294286000 |
| C | -6.468617000  | 4.935164000  | 1.831796000  |
| C | 4.683302000   | -1.909698000 | -0.287692000 |
| H | -6.687996000  | 5.792380000  | 2.466386000  |
| H | 4.955803000   | -2.958962000 | -0.286641000 |
| C | -2.732847000  | 2.335798000  | 0.387472000  |
| C | 0.742571000   | 1.046650000  | -0.459917000 |
| C | -1.374307000  | 2.294973000  | -0.072347000 |
| C | -0.646284000  | 1.056343000  | -0.061991000 |
| C | -0.744657000  | 3.496923000  | -0.539066000 |
| C | -1.310714000  | -0.155590000 | 0.351026000  |
| C | 0.567440000   | 3.393958000  | -1.105384000 |
| C | -2.617205000  | -0.041885000 | 0.926182000  |
| H | 0.996087000   | 4.257098000  | -1.600485000 |
| H | -3.059858000  | -0.902874000 | 1.410222000  |
| C | 1.276680000   | 2.232826000  | -1.060418000 |
| C | -3.289568000  | 1.143030000  | 0.950116000  |
| H | 2.244251000   | 2.191801000  | -1.543806000 |
| H | -4.260862000  | 1.190520000  | 1.427825000  |
| O | 2.067369000   | 8.206800000  | -0.368115000 |
| O | 6.098552000   | 1.457158000  | -0.181702000 |
| O | -4.134573000  | -4.912092000 | 0.164071000  |
| O | -8.093928000  | 2.150353000  | 0.081194000  |
| C | -9.491401000  | 2.324988000  | 0.377297000  |
| C | -10.300354000 | 1.231623000  | -0.335345000 |
| C | -11.782430000 | 1.459388000  | 0.020839000  |
| C | -9.857144000  | -0.159855000 | 0.154993000  |
| C | -10.109918000 | 1.342570000  | -1.859919000 |
| C | -5.222896000  | -3.972747000 | 0.035888000  |
| C | -6.547772000  | -4.746162000 | -0.024585000 |
| C | -7.671222000  | -3.700372000 | -0.165382000 |

|   |               |              |              |
|---|---------------|--------------|--------------|
| C | -6.556489000  | -5.686204000 | -1.244918000 |
| C | -6.748303000  | -5.555383000 | 1.270827000  |
| C | 2.927563000   | 7.422639000  | 0.476979000  |
| C | 4.237862000   | 8.188598000  | 0.712668000  |
| C | 4.958980000   | 8.423834000  | -0.628095000 |
| C | 3.948090000   | 9.534982000  | 1.402664000  |
| C | 5.115446000   | 7.313818000  | 1.629183000  |
| C | 7.527513000   | 1.245280000  | -0.156617000 |
| C | 8.233591000   | 2.603882000  | -0.049456000 |
| C | 7.818602000   | 3.314002000  | 1.253130000  |
| C | 7.884639000   | 3.480810000  | -1.266851000 |
| C | 9.748818000   | 2.321270000  | -0.027742000 |
| H | -9.808438000  | 3.319176000  | 0.036358000  |
| H | -9.637832000  | 2.265179000  | 1.463734000  |
| H | -12.128079000 | 2.445442000  | -0.312568000 |
| H | -11.950185000 | 1.387869000  | 1.102368000  |
| H | -12.408583000 | 0.703037000  | -0.465787000 |
| H | -9.993438000  | -0.258966000 | 1.239095000  |
| H | -8.802165000  | -0.343763000 | -0.072601000 |
| H | -10.451062000 | -0.942723000 | -0.330878000 |
| H | -10.435299000 | 2.323840000  | -2.227212000 |
| H | -10.702000000 | 0.577557000  | -2.375445000 |
| H | -9.060474000  | 1.206518000  | -2.140283000 |
| H | -5.210124000  | -3.294618000 | 0.898517000  |
| H | -5.077468000  | -3.384917000 | -0.879001000 |
| H | -8.646314000  | -4.198272000 | -0.209077000 |
| H | -7.555560000  | -3.109108000 | -1.081847000 |
| H | -7.686174000  | -3.008969000 | 0.685981000  |
| H | -6.423729000  | -5.124116000 | -2.177580000 |
| H | -7.511666000  | -6.220003000 | -1.307113000 |
| H | -5.755878000  | -6.429799000 | -1.178706000 |
| H | -6.755852000  | -4.899096000 | 2.149832000  |
| H | -5.951943000  | -6.294539000 | 1.405046000  |
| H | -7.705146000  | -6.089150000 | 1.241820000  |
| H | 3.130833000   | 6.459900000  | -0.009680000 |
| H | 2.416155000   | 7.231282000  | 1.429665000  |
| H | 5.184027000   | 7.473101000  | -1.127398000 |
| H | 5.906568000   | 8.950189000  | -0.465488000 |
| H | 4.347362000   | 9.026921000  | -1.306783000 |
| H | 3.309493000   | 10.170238000 | 0.780628000  |
| H | 4.882870000   | 10.074918000 | 1.593194000  |
| H | 3.444362000   | 9.385013000  | 2.365626000  |
| H | 5.337480000   | 6.344090000  | 1.166763000  |
| H | 4.626099000   | 7.127209000  | 2.592903000  |
| H | 6.069402000   | 7.814553000  | 1.829741000  |
| H | 7.822293000   | 0.724506000  | -1.076130000 |
| H | 7.775135000   | 0.612510000  | 0.704450000  |
| H | 8.346201000   | 4.269746000  | 1.349052000  |
| H | 8.064098000   | 2.704386000  | 2.131513000  |
| H | 6.742746000   | 3.516930000  | 1.270268000  |
| H | 6.809241000   | 3.679759000  | -1.318053000 |

|   |              |              |              |
|---|--------------|--------------|--------------|
| H | 8.186208000  | 2.995681000  | -2.203317000 |
| H | 8.405101000  | 4.443351000  | -1.204366000 |
| H | 10.027011000 | 1.691060000  | 0.825728000  |
| H | 10.306019000 | 3.261084000  | 0.054730000  |
| H | 10.076140000 | 1.816620000  | -0.944804000 |
| H | -3.336144000 | 5.653720000  | -0.077287000 |
| H | 4.997789000  | -7.996647000 | 0.077042000  |

Cartesian coordinates of DFT-optimized structure of **2box** complex by B3LYP/Def2-TZVP;  
6-31G(d,p)/CH<sub>3</sub>CN, charge = 2, multiplicity = 2

|    |              |              |              |
|----|--------------|--------------|--------------|
| Ru | 1.918634000  | -1.340919000 | -0.028594000 |
| N  | 0.442683000  | -2.826641000 | 0.119495000  |
| N  | 2.389380000  | -1.556379000 | 2.011970000  |
| N  | 3.695080000  | -2.470973000 | -0.038243000 |
| N  | 2.196990000  | -1.818291000 | -2.057014000 |
| N  | 2.780904000  | 0.588128000  | -0.195738000 |
| C  | 1.639333000  | -1.076763000 | 3.022912000  |
| H  | 0.720130000  | -0.578608000 | 2.742615000  |
| C  | 2.016081000  | -1.204468000 | 4.355930000  |
| H  | 1.377281000  | -0.796618000 | 5.130720000  |
| C  | 3.208169000  | -1.857826000 | 4.659221000  |
| H  | 3.531590000  | -1.975413000 | 5.687868000  |
| C  | 3.983117000  | -2.366687000 | 3.619365000  |
| H  | 4.910344000  | -2.884425000 | 3.832876000  |
| C  | 3.560983000  | -2.208933000 | 2.300079000  |
| C  | 4.304223000  | -2.730373000 | 1.135172000  |
| C  | 5.507893000  | -3.439578000 | 1.154149000  |
| H  | 6.015985000  | -3.660140000 | 2.084872000  |
| C  | 6.047504000  | -3.867185000 | -0.060325000 |
| C  | 5.392280000  | -3.597108000 | -1.262638000 |
| H  | 5.810431000  | -3.939435000 | -2.201264000 |
| C  | 4.191833000  | -2.882817000 | -1.220922000 |
| C  | 3.339425000  | -2.510920000 | -2.367507000 |
| C  | 3.636605000  | -2.840914000 | -3.689236000 |
| H  | 4.542751000  | -3.388176000 | -3.919315000 |
| C  | 2.763856000  | -2.467041000 | -4.708357000 |
| H  | 2.988828000  | -2.719822000 | -5.738903000 |
| C  | 1.602507000  | -1.770975000 | -4.381087000 |
| H  | 0.891665000  | -1.461804000 | -5.138593000 |
| C  | 1.352996000  | -1.467747000 | -3.046610000 |
| H  | 0.463663000  | -0.926958000 | -2.749170000 |
| C  | 0.652982000  | -4.157300000 | 0.077386000  |
| H  | 1.688134000  | -4.477992000 | 0.083908000  |
| C  | -0.366231000 | -5.086614000 | 0.024114000  |
| H  | -0.151929000 | -6.148289000 | -0.002566000 |
| C  | -1.692597000 | -4.625895000 | -0.022849000 |
| C  | -1.923869000 | -3.243724000 | 0.016749000  |
| H  | -2.927237000 | -2.859959000 | -0.074760000 |
| C  | -0.850281000 | -2.352660000 | 0.125005000  |

|   |              |              |              |
|---|--------------|--------------|--------------|
| C | -4.285386000 | 4.304590000  | -0.330453000 |
| C | -0.947697000 | -0.879712000 | 0.152591000  |
| C | -5.512235000 | 3.736748000  | 0.002239000  |
| C | 0.299023000  | -0.242789000 | -0.017719000 |
| C | -5.599599000 | 2.388380000  | 0.328763000  |
| C | 0.439236000  | 1.150316000  | -0.183377000 |
| C | 1.847811000  | 1.609733000  | -0.162308000 |
| C | 2.275255000  | 2.923137000  | -0.023147000 |
| H | 1.572028000  | 3.734334000  | 0.097585000  |
| C | 3.648613000  | 3.236068000  | 0.002048000  |
| C | 4.577300000  | 2.191916000  | -0.094075000 |
| H | 5.646298000  | 2.355612000  | -0.086816000 |
| C | 4.085823000  | 0.896031000  | -0.172050000 |
| H | 4.774538000  | 0.060029000  | -0.211902000 |
| C | -4.442591000 | 1.575119000  | 0.386059000  |
| C | -0.732974000 | 1.929493000  | -0.349311000 |
| C | -3.187051000 | 2.141746000  | -0.008684000 |
| C | -2.003132000 | 1.328934000  | -0.013260000 |
| C | -3.112403000 | 3.519139000  | -0.397569000 |
| C | -2.103275000 | -0.068742000 | 0.322348000  |
| C | -1.869958000 | 4.020970000  | -0.900300000 |
| C | -3.345322000 | -0.546030000 | 0.851697000  |
| H | -1.836022000 | 5.012021000  | -1.336993000 |
| H | -3.389627000 | -1.532921000 | 1.293227000  |
| C | -0.738597000 | 3.264256000  | -0.872547000 |
| C | -4.460786000 | 0.235980000  | 0.885313000  |
| H | 0.165758000  | 3.664181000  | -1.312190000 |
| H | -5.370776000 | -0.154442000 | 1.325076000  |
| O | 3.951473000  | 4.533072000  | 0.123955000  |
| O | -2.648171000 | -5.560810000 | -0.110111000 |
| C | -4.037867000 | -5.171683000 | -0.139187000 |
| C | -4.910590000 | -6.434224000 | -0.171618000 |
| C | -6.378355000 | -5.964956000 | -0.207837000 |
| C | -4.598167000 | -7.262321000 | -1.432456000 |
| C | -4.665824000 | -7.278404000 | 1.093560000  |
| C | 5.338061000  | 4.941370000  | 0.142662000  |
| C | 5.410143000  | 6.467983000  | 0.281700000  |
| C | 4.756687000  | 6.910062000  | 1.604816000  |
| C | 4.706326000  | 7.142617000  | -0.911006000 |
| C | 6.904534000  | 6.846267000  | 0.286497000  |
| H | -4.257406000 | -4.575245000 | 0.755125000  |
| H | -4.215373000 | -4.556158000 | -1.029900000 |
| H | -7.049656000 | -6.830774000 | -0.227288000 |
| H | -6.584839000 | -5.360975000 | -1.099722000 |
| H | -6.630197000 | -5.365725000 | 0.675585000  |
| H | -4.775745000 | -6.677276000 | -2.343346000 |
| H | -5.239535000 | -8.150159000 | -1.473240000 |
| H | -3.555665000 | -7.596487000 | -1.440648000 |
| H | -4.890753000 | -6.704260000 | 2.000951000  |
| H | -3.625529000 | -7.614252000 | 1.152746000  |
| H | -5.309475000 | -8.165456000 | 1.089318000  |

|   |              |              |              |
|---|--------------|--------------|--------------|
| H | 5.812793000  | 4.613945000  | -0.790378000 |
| H | 5.837849000  | 4.451251000  | 0.987027000  |
| H | 4.825807000  | 7.997962000  | 1.718270000  |
| H | 5.257042000  | 6.449538000  | 2.465685000  |
| H | 3.698198000  | 6.632284000  | 1.637975000  |
| H | 3.644244000  | 6.879591000  | -0.947004000 |
| H | 5.164082000  | 6.842229000  | -1.861568000 |
| H | 4.783074000  | 8.232930000  | -0.830774000 |
| H | 7.435396000  | 6.375709000  | 1.122993000  |
| H | 7.018212000  | 7.931504000  | 0.385941000  |
| H | 7.398154000  | 6.541910000  | -0.644419000 |
| H | -6.403740000 | 4.349488000  | 0.006280000  |
| H | 6.981157000  | -4.418965000 | -0.069045000 |
| N | -4.264615000 | 5.691212000  | -0.632049000 |
| C | -3.414552000 | 6.652373000  | -0.149194000 |
| C | -3.862986000 | 7.862542000  | -0.630504000 |
| C | -5.008901000 | 7.538829000  | -1.394612000 |
| N | -5.260693000 | 6.232653000  | -1.391395000 |
| N | -6.883377000 | 1.867276000  | 0.636392000  |
| N | -7.742031000 | 2.595382000  | 1.407214000  |
| C | -8.869215000 | 1.889035000  | 1.414067000  |
| C | -8.763317000 | 0.708845000  | 0.641019000  |
| C | -7.476531000 | 0.730878000  | 0.150142000  |
| H | -6.951629000 | 0.062917000  | -0.516094000 |
| H | -9.517536000 | -0.043241000 | 0.461583000  |
| H | -9.719896000 | 2.248867000  | 1.978719000  |
| H | -5.656717000 | 8.204851000  | -1.950238000 |
| H | -3.432226000 | 8.836562000  | -0.450496000 |
| H | -2.595502000 | 6.401011000  | 0.507723000  |

Cartesian coordinates of DFT-optimized structure of **3box** complex by B3LYP/Def2-TZVP;  
6-31G(d,p)/CH<sub>3</sub>CN, charge = 2, multiplicity = 2

|   |              |              |              |
|---|--------------|--------------|--------------|
| C | 2.339396000  | -2.461287000 | -0.334656000 |
| C | 3.697547000  | -2.452446000 | -0.269761000 |
| C | 4.427820000  | -1.234003000 | -0.117720000 |
| C | 3.701018000  | -0.001318000 | -0.030661000 |
| C | 2.264554000  | -0.002821000 | -0.083875000 |
| C | 1.566537000  | -1.256903000 | -0.270203000 |
| C | 4.413823000  | 1.234978000  | 0.118711000  |
| C | 3.672716000  | 2.426173000  | 0.399440000  |
| C | 2.314221000  | 2.427720000  | 0.393465000  |
| C | 1.560600000  | 1.251692000  | 0.070361000  |
| C | 0.157356000  | -1.207741000 | -0.344818000 |
| C | -0.528766000 | 0.008616000  | -0.198536000 |
| C | 0.158994000  | 1.221758000  | -0.044128000 |
| C | 5.840086000  | -1.195467000 | -0.051508000 |
| C | 6.523027000  | 0.013520000  | -0.002722000 |
| C | 5.824967000  | 1.216047000  | 0.060148000  |
| H | 1.847588000  | -3.418351000 | -0.405930000 |

|   |              |              |              |
|---|--------------|--------------|--------------|
| H | 4.233745000  | -3.390405000 | -0.339062000 |
| H | 1.799846000  | 3.329777000  | 0.691958000  |
| H | 4.204675000  | 3.331528000  | 0.665371000  |
| N | -0.740027000 | -2.300181000 | -0.526543000 |
| N | -2.081131000 | -2.022645000 | -0.313422000 |
| C | -2.752716000 | -3.137835000 | -0.591157000 |
| C | -1.873206000 | -4.153150000 | -1.005232000 |
| C | -0.616493000 | -3.588523000 | -0.966134000 |
| N | -0.724689000 | 2.337612000  | 0.022317000  |
| N | -2.067661000 | 2.045856000  | 0.172345000  |
| C | -2.717275000 | 3.209765000  | 0.124398000  |
| C | -1.818200000 | 4.269899000  | -0.077736000 |
| C | -0.571899000 | 3.683041000  | -0.154862000 |
| N | 6.615941000  | -2.386586000 | -0.074902000 |
| N | 7.677078000  | -2.483550000 | -0.926532000 |
| C | 8.241179000  | -3.651422000 | -0.628047000 |
| C | 6.532353000  | -3.469557000 | 0.759715000  |
| C | 7.567225000  | -4.315223000 | 0.423317000  |
| N | 6.580763000  | 2.415804000  | 0.102669000  |
| N | 7.708625000  | 2.478107000  | 0.868401000  |
| C | 8.226387000  | 3.675110000  | 0.607161000  |
| C | 7.455524000  | 4.395231000  | -0.335768000 |
| C | 6.410127000  | 3.553141000  | -0.643899000 |
| C | -1.732716000 | -0.424866000 | 2.965297000  |
| C | -1.959981000 | -0.581800000 | 4.328760000  |
| C | -3.271711000 | -0.592217000 | 4.796212000  |
| C | -4.314220000 | -0.448079000 | 3.883662000  |
| C | -4.031007000 | -0.295398000 | 2.527127000  |
| N | -2.736266000 | -0.281192000 | 2.079151000  |
| C | -5.066884000 | -0.145673000 | 1.486798000  |
| N | -4.558441000 | -0.002173000 | 0.248063000  |
| C | -5.335903000 | 0.138523000  | -0.842553000 |
| C | -6.726868000 | 0.145580000  | -0.712073000 |
| C | -7.276552000 | 0.000548000  | 0.562264000  |
| C | -6.450979000 | -0.149171000 | 1.677136000  |
| C | -4.562298000 | 0.263187000  | -2.093538000 |
| N | -3.200226000 | 0.206256000  | -1.953504000 |
| C | -2.422619000 | 0.298088000  | -3.049024000 |
| C | -2.950968000 | 0.457554000  | -4.326085000 |
| C | -4.333485000 | 0.521707000  | -4.479649000 |
| C | -5.143521000 | 0.421697000  | -3.350797000 |
| H | -0.728622000 | -0.408787000 | 2.561586000  |
| H | -1.115263000 | -0.691914000 | 4.998832000  |
| H | -3.484634000 | -0.710781000 | 5.853086000  |
| H | -5.342387000 | -0.452284000 | 4.224324000  |
| H | -7.371084000 | 0.257016000  | -1.575353000 |
| H | -6.881536000 | -0.268384000 | 2.663668000  |
| H | -1.354106000 | 0.244651000  | -2.885861000 |
| H | -2.279759000 | 0.528373000  | -5.174070000 |
| H | -4.778956000 | 0.645973000  | -5.460733000 |
| H | -6.221475000 | 0.466603000  | -3.447060000 |

|    |              |              |              |
|----|--------------|--------------|--------------|
| Ru | -2.470085000 | -0.002339000 | 0.011055000  |
| H  | -3.828498000 | -3.156546000 | -0.491790000 |
| H  | -2.121918000 | -5.160099000 | -1.303064000 |
| H  | 0.328616000  | -4.010217000 | -1.256096000 |
| H  | -3.792554000 | 3.230612000  | 0.228600000  |
| H  | -2.047062000 | 5.320736000  | -0.165733000 |
| H  | 0.387125000  | 4.126595000  | -0.358091000 |
| H  | 9.111380000  | -3.979664000 | -1.182122000 |
| H  | 5.775317000  | -3.532009000 | 1.527363000  |
| H  | 7.805374000  | -5.267033000 | 0.875050000  |
| H  | 9.134694000  | 3.983650000  | 1.108895000  |
| H  | 7.640029000  | 5.380690000  | -0.737584000 |
| H  | 5.590213000  | 3.652270000  | -1.339368000 |
| H  | 7.605023000  | 0.020780000  | -0.003253000 |
| H  | -8.353873000 | 0.000966000  | 0.686591000  |

Cartesian coordinates of DFT-optimized structure of **4box** complex by B3LYP/Def2-TZVP; 6-31G(d,p)/CH<sub>3</sub>CN, charge = 2, multiplicity = 2

|    |              |              |              |
|----|--------------|--------------|--------------|
| Ru | 3.823308000  | -0.349980000 | 0.002511000  |
| N  | -6.109727000 | 2.687708000  | -1.779831000 |
| N  | 3.212639000  | -2.284486000 | 0.516991000  |
| N  | 4.363873000  | 0.125382000  | 1.980829000  |
| N  | 5.915388000  | -0.559277000 | 0.013458000  |
| N  | 4.277743000  | -0.935575000 | -1.967944000 |
| N  | -6.603466000 | -1.327749000 | 1.440217000  |
| N  | 3.624172000  | 1.668640000  | -0.517449000 |
| C  | 3.493849000  | 0.472931000  | 2.948277000  |
| H  | 2.449096000  | 0.503023000  | 2.666905000  |
| C  | 3.901692000  | 0.777712000  | 4.242985000  |
| H  | 3.158934000  | 1.051486000  | 4.983307000  |
| C  | 5.258076000  | 0.721127000  | 4.553185000  |
| H  | 5.610257000  | 0.951609000  | 5.552859000  |
| C  | 6.162978000  | 0.361651000  | 3.557170000  |
| H  | 7.222894000  | 0.311154000  | 3.774213000  |
| C  | 5.700847000  | 0.066759000  | 2.275260000  |
| C  | 6.583435000  | -0.321367000 | 1.157899000  |
| C  | 7.973922000  | -0.452645000 | 1.194840000  |
| H  | 8.531788000  | -0.266711000 | 2.104404000  |
| C  | 8.637694000  | -0.831442000 | 0.027311000  |
| C  | 7.923786000  | -1.074113000 | -1.146887000 |
| H  | 8.442551000  | -1.368497000 | -2.050840000 |
| C  | 6.534402000  | -0.928190000 | -1.124068000 |
| C  | 5.603083000  | -1.141550000 | -2.249130000 |
| C  | 6.009445000  | -1.531489000 | -3.524564000 |
| H  | 7.060720000  | -1.690229000 | -3.731906000 |
| C  | 5.060289000  | -1.715714000 | -4.527233000 |
| H  | 5.369326000  | -2.019065000 | -5.521716000 |
| C  | 3.716264000  | -1.504885000 | -4.230027000 |
| H  | 2.940493000  | -1.635922000 | -4.975519000 |

|   |              |              |              |
|---|--------------|--------------|--------------|
| C | 3.364843000  | -1.115868000 | -2.941347000 |
| H | 2.331719000  | -0.941932000 | -2.669318000 |
| C | -6.797438000 | 3.784611000  | -2.135481000 |
| C | 3.727045000  | -3.505746000 | 0.655941000  |
| H | -7.657016000 | 3.619295000  | -2.782502000 |
| C | -6.478575000 | 5.074363000  | -1.735064000 |
| H | -7.067138000 | 5.929131000  | -2.050348000 |
| C | -5.372359000 | 5.254487000  | -0.890132000 |
| C | -4.639604000 | 4.123460000  | -0.506563000 |
| H | -3.796753000 | 4.201302000  | 0.167592000  |
| C | -5.038330000 | 2.865162000  | -0.985213000 |
| N | 1.837147000  | -2.431058000 | 0.538371000  |
| C | -4.328560000 | 1.621453000  | -0.561368000 |
| C | 1.076649000  | -1.250744000 | 0.317857000  |
| C | -5.115040000 | 0.552977000  | -0.127691000 |
| C | 1.887158000  | -0.154311000 | -0.016359000 |
| C | -4.573414000 | -0.650700000 | 0.327468000  |
| C | 1.321530000  | 1.080381000  | -0.371155000 |
| C | -5.532992000 | -1.726099000 | 0.714903000  |
| N | 2.306650000  | 2.085968000  | -0.566315000 |
| C | -5.369690000 | -3.042206000 | 0.280174000  |
| H | -4.529072000 | -3.335703000 | -0.338378000 |
| C | -6.331403000 | -4.006598000 | 0.622301000  |
| C | -7.433349000 | -3.603056000 | 1.386494000  |
| H | -8.215338000 | -4.289760000 | 1.684802000  |
| C | -7.508808000 | -2.258460000 | 1.753434000  |
| C | 4.373896000  | 2.765205000  | -0.625336000 |
| H | -8.359978000 | -1.917399000 | 2.340637000  |
| C | -3.164495000 | -0.788029000 | 0.403933000  |
| C | -0.070253000 | 1.217738000  | -0.527994000 |
| C | -2.324131000 | 0.270672000  | -0.081469000 |
| C | -0.895404000 | 0.126118000  | -0.059018000 |
| C | -2.919278000 | 1.474506000  | -0.590356000 |
| C | -0.319489000 | -1.107222000 | 0.430822000  |
| C | -2.061840000 | 2.458462000  | -1.182466000 |
| C | -1.188546000 | -2.077377000 | 1.027330000  |
| H | -2.506045000 | 3.304097000  | -1.693331000 |
| H | -0.767439000 | -2.922406000 | 1.555227000  |
| C | -0.707584000 | 2.340043000  | -1.149753000 |
| C | -2.539524000 | -1.921728000 | 1.018303000  |
| H | -0.108432000 | 3.079771000  | -1.663922000 |
| H | -3.159415000 | -2.660463000 | 1.511415000  |
| O | -5.105761000 | 6.518783000  | -0.501881000 |
| O | -6.111077000 | -5.258346000 | 0.169492000  |
| C | -7.073820000 | -6.287216000 | 0.461363000  |
| C | -6.600757000 | -7.611174000 | -0.156250000 |
| C | -7.667282000 | -8.673074000 | 0.175621000  |
| C | -5.247905000 | -8.025407000 | 0.453171000  |
| C | -6.471934000 | -7.466197000 | -1.684419000 |
| C | -3.981618000 | 6.770887000  | 0.359224000  |
| C | -3.895624000 | 8.276817000  | 0.648296000  |

|   |              |              |              |
|---|--------------|--------------|--------------|
| C | -3.703228000 | 9.058180000  | -0.665316000 |
| C | -5.174150000 | 8.751166000  | 1.364847000  |
| C | -2.675691000 | 8.493473000  | 1.564764000  |
| H | -8.047050000 | -5.995270000 | 0.045551000  |
| H | -7.175008000 | -6.386490000 | 1.550006000  |
| H | -8.643838000 | -8.405326000 | -0.246024000 |
| H | -7.786893000 | -8.797414000 | 1.258735000  |
| H | -7.377132000 | -9.643643000 | -0.242604000 |
| H | -5.325461000 | -8.147554000 | 1.540713000  |
| H | -4.475362000 | -7.276833000 | 0.249934000  |
| H | -4.915241000 | -8.980753000 | 0.030926000  |
| H | -7.430178000 | -7.180288000 | -2.135724000 |
| H | -6.159847000 | -8.416605000 | -2.132735000 |
| H | -5.730919000 | -6.705415000 | -1.949880000 |
| H | -3.065293000 | 6.421882000  | -0.135023000 |
| H | -4.110287000 | 6.208646000  | 1.293368000  |
| H | -2.789913000 | 8.740437000  | -1.183587000 |
| H | -3.617552000 | 10.131739000 | -0.461252000 |
| H | -4.548633000 | 8.907713000  | -1.344241000 |
| H | -6.060450000 | 8.590476000  | 0.742700000  |
| H | -5.108794000 | 9.821132000  | 1.593939000  |
| H | -5.319866000 | 8.213491000  | 2.310054000  |
| H | -1.747361000 | 8.166830000  | 1.080293000  |
| H | -2.779587000 | 7.942750000  | 2.507687000  |
| H | -2.569799000 | 9.556645000  | 1.808491000  |
| H | -6.192930000 | 0.661721000  | -0.144650000 |
| H | 9.716863000  | -0.938829000 | 0.032602000  |
| C | 2.265678000  | 3.446949000  | -0.672891000 |
| C | 3.563877000  | 3.909921000  | -0.728287000 |
| C | 1.524882000  | -3.755191000 | 0.659907000  |
| C | 2.703677000  | -4.465324000 | 0.751906000  |
| H | 4.799259000  | -3.638859000 | 0.671492000  |
| H | 5.451315000  | 2.683374000  | -0.614150000 |
| H | 1.335956000  | 3.989028000  | -0.670321000 |
| H | 3.883402000  | 4.936417000  | -0.821564000 |
| H | 0.506905000  | -4.103229000 | 0.640993000  |
| H | 2.810741000  | -5.533250000 | 0.864004000  |

Cartesian coordinates of DFT-optimized structure of **5box** complex by B3LYP/Def2-TZVP;  
6-31G(d,p)/CH<sub>3</sub>CN, charge = 2, multiplicity = 2

|    |              |              |              |
|----|--------------|--------------|--------------|
| Ru | 3.512508000  | 0.038942000  | 0.008739000  |
| N  | 2.333041000  | -1.671329000 | 0.272136000  |
| N  | 4.091112000  | -0.000304000 | 2.031093000  |
| N  | 5.477444000  | -0.697434000 | -0.051659000 |
| N  | 3.782630000  | -0.489703000 | -2.008322000 |
| N  | -6.711598000 | 2.330284000  | 1.535086000  |
| C  | 3.292682000  | 0.335511000  | 3.062199000  |
| H  | 2.274635000  | 0.604801000  | 2.811380000  |
| C  | 3.741984000  | 0.344812000  | 4.378758000  |

|   |              |              |              |
|---|--------------|--------------|--------------|
| H | 3.059817000  | 0.627220000  | 5.172201000  |
| C | 5.062050000  | -0.013256000 | 4.641948000  |
| H | 5.444483000  | -0.018332000 | 5.656939000  |
| C | 5.890085000  | -0.373093000 | 3.580703000  |
| H | 6.917637000  | -0.662914000 | 3.763837000  |
| C | 5.390523000  | -0.362640000 | 2.279468000  |
| C | 6.182873000  | -0.748350000 | 1.094476000  |
| C | 7.521414000  | -1.148141000 | 1.071571000  |
| H | 8.109033000  | -1.196647000 | 1.980051000  |
| C | 8.093074000  | -1.488049000 | -0.155860000 |
| C | 7.338966000  | -1.436541000 | -1.329280000 |
| H | 7.785537000  | -1.707712000 | -2.278111000 |
| C | 6.004353000  | -1.030880000 | -1.245300000 |
| C | 5.035900000  | -0.926222000 | -2.354682000 |
| C | 5.333215000  | -1.262006000 | -3.674563000 |
| H | 6.326161000  | -1.608593000 | -3.933960000 |
| C | 4.348269000  | -1.154681000 | -4.653936000 |
| H | 4.572918000  | -1.413072000 | -5.683176000 |
| C | 3.076802000  | -0.718124000 | -4.289288000 |
| H | 2.277680000  | -0.622885000 | -5.015257000 |
| C | 2.831948000  | -0.398876000 | -2.957719000 |
| H | 1.858907000  | -0.055553000 | -2.630017000 |
| C | 2.788417000  | -2.940458000 | 0.282221000  |
| H | 3.865408000  | -3.060479000 | 0.288120000  |
| C | 1.960760000  | -4.044304000 | 0.275095000  |
| H | 2.369149000  | -5.047716000 | 0.284611000  |
| C | 0.571668000  | -3.840712000 | 0.220504000  |
| C | 0.085267000  | -2.525831000 | 0.219445000  |
| H | -0.972835000 | -2.341202000 | 0.129944000  |
| C | 0.972193000  | -1.445531000 | 0.281113000  |
| C | -3.575653000 | 4.524508000  | -0.230641000 |
| C | 0.601404000  | -0.015509000 | 0.260871000  |
| C | -4.682023000 | 3.758517000  | 0.122880000  |
| C | 1.716749000  | 0.818023000  | 0.046432000  |
| C | -4.562981000 | 2.406331000  | 0.444868000  |
| C | 1.586670000  | 2.197729000  | -0.156057000 |
| C | -5.823888000 | 1.671219000  | 0.755661000  |
| C | -6.094530000 | 0.419053000  | 0.202442000  |
| H | -5.390229000 | -0.074452000 | -0.457565000 |
| C | -7.322904000 | -0.204746000 | 0.476201000  |
| C | -8.237911000 | 0.464363000  | 1.298628000  |
| H | -9.203574000 | 0.046221000  | 1.553052000  |
| C | -7.873333000 | 1.720833000  | 1.785128000  |
| H | -8.571222000 | 2.265597000  | 2.418892000  |
| C | -3.273922000 | 1.811707000  | 0.479933000  |
| C | 0.316826000  | 2.788219000  | -0.294649000 |
| C | -2.128428000 | 2.579089000  | 0.083175000  |
| C | -0.823568000 | 1.978385000  | 0.070047000  |
| C | -2.288198000 | 3.949501000  | -0.307816000 |
| C | -0.677445000 | 0.585932000  | 0.418300000  |
| C | -1.153687000 | 4.660330000  | -0.814681000 |

|   |               |              |              |
|---|---------------|--------------|--------------|
| C | -1.821833000  | -0.092224000 | 0.949400000  |
| H | -1.292790000  | 5.646798000  | -1.240487000 |
| H | -1.699780000  | -1.069485000 | 1.397267000  |
| C | 0.089591000   | 4.108418000  | -0.802753000 |
| C | -3.053675000  | 0.488540000  | 0.979082000  |
| H | 0.907872000   | 4.659607000  | -1.247447000 |
| H | -3.882794000  | -0.052559000 | 1.418841000  |
| O | -0.191633000  | -4.939782000 | 0.164700000  |
| O | -7.522723000  | -1.410819000 | -0.094404000 |
| C | -8.777443000  | -2.083004000 | 0.118068000  |
| C | -8.772537000  | -3.419027000 | -0.639019000 |
| C | -10.137172000 | -4.087869000 | -0.382148000 |
| C | -7.643733000  | -4.323693000 | -0.109445000 |
| C | -8.590988000  | -3.172209000 | -2.148552000 |
| C | -1.629068000  | -4.818694000 | 0.111545000  |
| C | -2.246760000  | -6.223268000 | 0.062530000  |
| C | -3.776266000  | -6.039894000 | 0.011874000  |
| C | -1.769230000  | -6.966403000 | -1.199505000 |
| C | -1.859805000  | -7.016892000 | 1.324943000  |
| H | -9.592220000  | -1.441163000 | -0.241704000 |
| H | -8.915822000  | -2.253216000 | 1.193710000  |
| H | -10.963270000 | -3.465771000 | -0.747615000 |
| H | -10.297725000 | -4.272770000 | 0.686990000  |
| H | -10.188959000 | -5.051958000 | -0.900383000 |
| H | -7.763973000  | -4.517544000 | 0.963712000  |
| H | -6.661307000  | -3.865818000 | -0.263852000 |
| H | -7.653676000  | -5.289366000 | -0.628110000 |
| H | -9.393991000  | -2.538038000 | -2.544203000 |
| H | -8.612748000  | -4.122007000 | -2.695406000 |
| H | -7.635565000  | -2.680739000 | -2.358413000 |
| H | -1.970715000  | -4.275542000 | 1.001633000  |
| H | -1.904404000  | -4.245027000 | -0.782289000 |
| H | -4.271917000  | -7.016503000 | -0.022890000 |
| H | -4.084157000  | -5.476367000 | -0.877241000 |
| H | -4.145778000  | -5.508304000 | 0.897216000  |
| H | -2.047791000  | -6.419807000 | -2.108939000 |
| H | -2.226846000  | -7.960906000 | -1.251572000 |
| H | -0.681846000  | -7.093289000 | -1.198463000 |
| H | -2.201836000  | -6.506101000 | 2.233516000  |
| H | -0.775214000  | -7.147659000 | 1.395831000  |
| H | -2.320942000  | -8.010960000 | 1.304763000  |
| H | -5.658564000  | 4.225567000  | 0.145164000  |
| H | 9.131155000   | -1.799189000 | -0.197416000 |
| N | 2.842359000   | 2.869223000  | -0.240842000 |
| C | 3.218142000   | 4.176327000  | -0.161402000 |
| C | 4.599781000   | 4.228446000  | -0.180308000 |
| C | 5.019529000   | 2.892174000  | -0.248388000 |
| N | 3.965879000   | 2.069321000  | -0.272825000 |
| N | -3.790475000  | 5.896518000  | -0.533509000 |
| C | -3.126721000  | 6.988127000  | -0.038360000 |
| C | -3.765165000  | 8.104803000  | -0.532619000 |

|   |              |             |              |
|---|--------------|-------------|--------------|
| C | -4.823593000 | 7.590169000 | -1.317088000 |
| N | -4.848348000 | 6.259573000 | -1.314142000 |
| H | -2.288745000 | 6.879605000 | 0.633776000  |
| H | -3.510263000 | 9.138070000 | -0.347786000 |
| H | -5.565056000 | 8.135515000 | -1.887095000 |
| H | 6.020106000  | 2.484619000 | -0.273387000 |
| H | 5.216469000  | 5.113123000 | -0.142816000 |
| H | 2.495979000  | 4.969185000 | -0.066560000 |

Cartesian coordinates of DFT-optimized structure of **6box** complex by B3LYP/Def2-TZVP;  
6-31G(d,p)/CH<sub>3</sub>CN, charge = 2, multiplicity = 2

|    |              |              |              |
|----|--------------|--------------|--------------|
| Ru | -2.671352000 | -1.551615000 | -0.037221000 |
| N  | -3.353087000 | 0.404798000  | 0.280176000  |
| N  | -2.935753000 | -2.008415000 | 1.998456000  |
| N  | -4.424501000 | -2.706193000 | -0.011491000 |
| N  | -3.358485000 | -1.455961000 | -2.022089000 |
| C  | -2.139997000 | -1.566610000 | 2.991113000  |
| H  | -1.333514000 | -0.905681000 | 2.700058000  |
| C  | -2.331207000 | -1.936465000 | 4.318402000  |
| H  | -1.659139000 | -1.556320000 | 5.078958000  |
| C  | -3.387825000 | -2.787156000 | 4.634813000  |
| H  | -3.566206000 | -3.094134000 | 5.659748000  |
| C  | -4.222292000 | -3.237873000 | 3.614178000  |
| H  | -5.055349000 | -3.892875000 | 3.838817000  |
| C  | -3.984514000 | -2.839397000 | 2.299719000  |
| C  | -4.825641000 | -3.245089000 | 1.155926000  |
| C  | -5.942987000 | -4.083105000 | 1.189136000  |
| H  | -6.284750000 | -4.527602000 | 2.115801000  |
| C  | -6.620706000 | -4.335829000 | -0.004818000 |
| C  | -6.191430000 | -3.758384000 | -1.200710000 |
| H  | -6.726254000 | -3.949888000 | -2.122865000 |
| C  | -5.066052000 | -2.930419000 | -1.174133000 |
| C  | -4.462069000 | -2.215390000 | -2.316049000 |
| C  | -4.964730000 | -2.267670000 | -3.615377000 |
| H  | -5.835659000 | -2.873334000 | -3.834727000 |
| C  | -4.344679000 | -1.536453000 | -4.626257000 |
| H  | -4.729920000 | -1.572881000 | -5.639539000 |
| C  | -3.232448000 | -0.758469000 | -4.313298000 |
| H  | -2.720443000 | -0.168707000 | -5.064771000 |
| C  | -2.771140000 | -0.742058000 | -3.001084000 |
| H  | -1.909112000 | -0.153514000 | -2.713605000 |
| C  | -4.644892000 | 0.782749000  | 0.363499000  |
| H  | -5.375419000 | -0.016939000 | 0.400136000  |
| C  | -5.050090000 | 2.101611000  | 0.392921000  |
| H  | -6.099807000 | 2.360596000  | 0.461782000  |
| C  | -4.073009000 | 3.106578000  | 0.295592000  |
| C  | -2.725800000 | 2.726567000  | 0.216426000  |
| H  | -1.958992000 | 3.473914000  | 0.091677000  |
| C  | -2.371983000 | 1.373548000  | 0.247802000  |

|   |              |              |              |
|---|--------------|--------------|--------------|
| C | 5.119478000  | 1.570749000  | -0.610517000 |
| C | -0.999772000 | 0.835433000  | 0.152222000  |
| C | 5.134587000  | 2.922190000  | -0.259160000 |
| C | -0.988380000 | -0.553565000 | -0.083132000 |
| C | 3.980554000  | 3.581919000  | 0.147344000  |
| C | 0.195497000  | -1.252582000 | -0.350967000 |
| C | 2.747976000  | 2.896874000  | 0.247661000  |
| C | 1.411370000  | -0.566795000 | -0.533815000 |
| C | 2.691047000  | 1.530050000  | -0.179359000 |
| C | 1.439535000  | 0.825663000  | -0.148624000 |
| C | 3.886033000  | 0.871000000  | -0.624799000 |
| C | 0.242360000  | 1.516094000  | 0.266204000  |
| C | 3.767819000  | -0.458873000 | -1.145778000 |
| C | 0.384836000  | 2.828904000  | 0.822508000  |
| H | 4.629410000  | -0.918714000 | -1.614300000 |
| H | -0.459343000 | 3.288990000  | 1.318837000  |
| C | 2.593881000  | -1.145316000 | -1.098006000 |
| C | 1.576350000  | 3.488009000  | 0.815457000  |
| H | 2.544636000  | -2.124068000 | -1.556959000 |
| H | 1.645897000  | 4.466266000  | 1.276038000  |
| O | -4.513732000 | 4.371267000  | 0.279047000  |
| C | -3.572117000 | 5.460449000  | 0.171438000  |
| C | -4.336927000 | 6.790880000  | 0.208558000  |
| C | -3.288332000 | 7.914158000  | 0.087395000  |
| C | -5.322165000 | 6.868756000  | -0.973155000 |
| C | -5.095065000 | 6.928464000  | 1.542582000  |
| H | -2.863034000 | 5.399859000  | 1.006476000  |
| H | -3.020310000 | 5.358661000  | -0.771372000 |
| H | -3.780581000 | 8.892835000  | 0.108217000  |
| H | -2.728312000 | 7.840651000  | -0.852811000 |
| H | -2.569755000 | 7.882753000  | 0.915347000  |
| H | -4.796662000 | 6.783113000  | -1.932333000 |
| H | -5.851354000 | 7.828513000  | -0.964544000 |
| H | -6.068831000 | 6.069737000  | -0.921710000 |
| H | -4.406098000 | 6.883697000  | 2.395090000  |
| H | -5.836926000 | 6.132390000  | 1.662815000  |
| H | -5.619326000 | 7.890004000  | 1.584505000  |
| H | -7.491330000 | -4.982552000 | -0.002081000 |
| N | -0.000025000 | -2.662542000 | -0.442246000 |
| C | 0.842011000  | -3.733813000 | -0.425826000 |
| C | 0.074784000  | -4.883744000 | -0.417420000 |
| C | -1.255718000 | -4.440761000 | -0.404287000 |
| N | -1.306646000 | -3.104793000 | -0.407084000 |
| H | -2.171242000 | -5.014447000 | -0.386488000 |
| H | 0.431744000  | -5.902058000 | -0.414486000 |
| H | 1.911367000  | -3.615168000 | -0.391254000 |
| N | 4.086596000  | 4.958885000  | 0.482046000  |
| N | 5.139721000  | 5.394704000  | 1.231366000  |
| C | 4.998062000  | 6.717178000  | 1.274209000  |
| C | 3.867216000  | 7.155521000  | 0.546411000  |
| C | 3.309428000  | 5.999486000  | 0.045263000  |

|   |              |              |              |
|---|--------------|--------------|--------------|
| C | 6.428599000  | 0.949767000  | -0.972185000 |
| C | 6.817687000  | -0.283645000 | -0.426253000 |
| C | 8.081639000  | -0.794936000 | -0.749682000 |
| C | 8.902558000  | -0.045309000 | -1.606439000 |
| C | 8.426929000  | 1.170552000  | -2.076594000 |
| N | 7.221664000  | 1.680236000  | -1.777151000 |
| O | 8.586410000  | -1.958654000 | -0.291287000 |
| C | 7.797750000  | -2.770284000 | 0.596720000  |
| C | 8.600105000  | -4.022496000 | 0.980565000  |
| C | 7.713563000  | -4.856421000 | 1.925959000  |
| C | 8.933296000  | -4.844102000 | -0.279236000 |
| C | 9.896283000  | -3.616699000 | 1.707508000  |
| H | 5.711288000  | 7.311590000  | 1.831020000  |
| H | 3.514795000  | 8.166318000  | 0.401998000  |
| H | 2.457110000  | 5.833994000  | -0.596494000 |
| H | 6.156246000  | -0.806079000 | 0.252125000  |
| H | 9.886566000  | -0.413172000 | -1.876136000 |
| H | 9.049878000  | 1.774331000  | -2.733903000 |
| H | 6.864074000  | -3.051574000 | 0.091879000  |
| H | 7.548775000  | -2.186355000 | 1.492320000  |
| H | 7.455509000  | -4.295483000 | 2.832582000  |
| H | 8.240967000  | -5.766151000 | 2.234408000  |
| H | 6.780022000  | -5.160012000 | 1.436544000  |
| H | 8.019450000  | -5.154503000 | -0.801010000 |
| H | 9.489577000  | -5.749230000 | -0.009276000 |
| H | 9.544455000  | -4.265887000 | -0.979539000 |
| H | 9.676579000  | -3.038502000 | 2.613693000  |
| H | 10.538632000 | -3.007303000 | 1.063818000  |
| H | 10.461227000 | -4.507236000 | 2.006462000  |
| H | 6.067656000  | 3.469981000  | -0.297639000 |

Cartesian coordinates of DFT-optimized structure of **7a** complex by B3LYP/Def2-TZVP;  
6-31G(d,p)/CH<sub>3</sub>CN, charge = 2, multiplicity = 1

|    |              |              |              |
|----|--------------|--------------|--------------|
| Os | -5.552880000 | -0.049698000 | 0.032965000  |
| Os | 5.543806000  | 0.094285000  | 0.000328000  |
| N  | -5.081891000 | -2.089341000 | 0.290784000  |
| N  | 5.072890000  | 2.134032000  | -0.256985000 |
| N  | -6.014375000 | 0.241079000  | 2.055692000  |
| N  | 6.003229000  | -0.196598000 | -2.022826000 |
| N  | -7.597146000 | -0.080488000 | 0.023406000  |
| N  | 7.588113000  | 0.124734000  | 0.007854000  |
| N  | -5.986108000 | -0.351662000 | -1.995803000 |
| N  | 5.979145000  | 0.396220000  | 2.028648000  |
| N  | -5.141320000 | 2.003401000  | -0.220231000 |
| N  | 5.132162000  | -1.958734000 | 0.253926000  |
| C  | -5.138178000 | 0.404028000  | 3.074985000  |
| C  | 5.125982000  | -0.359410000 | -3.041244000 |
| H  | 4.079959000  | -0.329750000 | -2.762120000 |
| C  | -5.535314000 | 0.596683000  | 4.390275000  |

|   |               |              |              |
|---|---------------|--------------|--------------|
| C | 5.521763000   | -0.552221000 | -4.356919000 |
| H | 4.768623000   | -0.676914000 | -5.127219000 |
| C | -6.899542000  | 0.626338000  | 4.690006000  |
| C | 6.885685000   | -0.582218000 | -4.658004000 |
| C | -7.813693000  | 0.461156000  | 3.655819000  |
| C | 7.800897000   | -0.417171000 | -3.624735000 |
| H | -8.877807000  | 0.480668000  | 3.860621000  |
| C | -7.365940000  | 0.269303000  | 2.345453000  |
| C | 7.354501000   | -0.225116000 | -2.313941000 |
| C | -8.267537000  | 0.084735000  | 1.198779000  |
| C | 8.257285000   | -0.040641000 | -1.168192000 |
| C | -9.663488000  | 0.061623000  | 1.212459000  |
| C | 9.653224000   | -0.017705000 | -1.183284000 |
| H | -10.212921000 | 0.190746000  | 2.137815000  |
| H | 10.201714000  | -0.146909000 | -2.109190000 |
| C | -10.350574000 | -0.132349000 | 0.011645000  |
| C | 10.341553000  | 0.176212000  | 0.016829000  |
| C | -9.646599000  | -0.300285000 | -1.183207000 |
| C | 9.638814000   | 0.344272000  | 1.212389000  |
| C | -8.250833000  | -0.271075000 | -1.157300000 |
| C | 8.243020000   | 0.315269000  | 1.187883000  |
| C | -7.333699000  | -0.424443000 | -2.296081000 |
| C | 7.327047000   | 0.468827000  | 2.327573000  |
| C | -7.765014000  | -0.628769000 | -3.609988000 |
| C | 7.759726000   | 0.673161000  | 3.641029000  |
| H | -8.826369000  | -0.683291000 | -3.822500000 |
| C | -6.838305000  | -0.761893000 | -4.637575000 |
| C | 6.834084000   | 0.806450000  | 4.669552000  |
| C | -5.478233000  | -0.686097000 | -4.327507000 |
| C | 5.473689000   | 0.730810000  | 4.360868000  |
| H | 4.712533000   | 0.828546000  | 5.127200000  |
| C | -5.097584000  | -0.482231000 | -3.008929000 |
| C | 5.091674000   | 0.526949000  | 3.042683000  |
| H | 4.048845000   | 0.461553000  | 2.758029000  |
| C | -5.979308000  | -3.102057000 | 0.323996000  |
| C | 5.970365000   | 3.146687000  | -0.290453000 |
| H | -7.022450000  | -2.808149000 | 0.334872000  |
| H | 7.013476000   | 2.852696000  | -0.301940000 |
| C | -5.631982000  | -4.436331000 | 0.332702000  |
| C | 5.623128000   | 4.480989000  | -0.298711000 |
| H | -6.390252000  | -5.210075000 | 0.360707000  |
| H | 6.381440000   | 5.254684000  | -0.326952000 |
| C | -4.268623000  | -4.772965000 | 0.268836000  |
| C | 4.259826000   | 4.817716000  | -0.234107000 |
| C | -3.326662000  | -3.741783000 | 0.240455000  |
| C | 3.317803000   | 3.786596000  | -0.205438000 |
| H | -2.277913000  | -3.970009000 | 0.138647000  |
| H | 2.269116000   | 4.014859000  | -0.103048000 |
| C | -3.730919000  | -2.397447000 | 0.293090000  |
| C | 3.721950000   | 2.442246000  | -0.258512000 |
| C | -2.843339000  | -1.227333000 | 0.249900000  |

|   |              |              |              |
|---|--------------|--------------|--------------|
| C | 2.834291000  | 1.272208000  | -0.214947000 |
| C | -3.557619000 | -0.023480000 | 0.035636000  |
| C | 3.548546000  | 0.068300000  | -0.000889000 |
| C | -2.876373000 | 1.197367000  | -0.186295000 |
| C | 2.867274000  | -1.152495000 | 0.221232000  |
| C | -3.792130000 | 2.346395000  | -0.226822000 |
| C | 3.782940000  | -2.301606000 | 0.261352000  |
| C | -3.433585000 | 3.695116000  | -0.175476000 |
| C | 3.424256000  | -3.650308000 | 0.210421000  |
| H | -2.397919000 | 3.989117000  | -0.084159000 |
| H | 2.388514000  | -3.944244000 | 0.119777000  |
| C | -4.400701000 | 4.707674000  | -0.196016000 |
| C | 4.391298000  | -4.662943000 | 0.230546000  |
| C | -5.753361000 | 4.341726000  | -0.254365000 |
| C | 5.744025000  | -4.297105000 | 0.288037000  |
| H | -6.556551000 | 5.065932000  | -0.279495000 |
| H | 6.547167000  | -5.021376000 | 0.312799000  |
| C | -6.058655000 | 2.989491000  | -0.248119000 |
| C | 6.049429000  | -2.944898000 | 0.281414000  |
| H | -7.094478000 | 2.670267000  | -0.255393000 |
| H | 7.085284000  | -2.625762000 | 0.288017000  |
| C | -1.463300000 | 1.195122000  | -0.344655000 |
| C | 1.454226000  | -1.150148000 | 0.379883000  |
| C | -0.724643000 | 0.012630000  | 0.021123000  |
| C | 0.715571000  | 0.032363000  | 0.014172000  |
| C | -1.428196000 | -1.188346000 | 0.394866000  |
| C | 1.419127000  | 1.233323000  | -0.359618000 |
| C | -0.651659000 | -2.248665000 | 0.961822000  |
| C | 0.642591000  | 2.293707000  | -0.926455000 |
| H | -1.154458000 | -3.063333000 | 1.468484000  |
| H | 1.145399000  | 3.108427000  | -1.433025000 |
| C | 0.712758000  | -2.231337000 | 0.953366000  |
| C | -0.721822000 | 2.276370000  | -0.918020000 |
| H | 1.243719000  | -3.034103000 | 1.450066000  |
| H | -1.252778000 | 3.079172000  | -1.414666000 |
| O | -3.976122000 | -6.087651000 | 0.230525000  |
| O | 3.931449000  | -5.928776000 | 0.182491000  |
| O | 3.967441000  | 6.132414000  | -0.195395000 |
| O | -3.940980000 | 5.973532000  | -0.147481000 |
| C | -4.884019000 | 7.061854000  | -0.147151000 |
| C | -4.121592000 | 8.392727000  | -0.075958000 |
| C | -5.176361000 | 9.516575000  | -0.072331000 |
| C | -3.205962000 | 8.544306000  | -1.305416000 |
| C | -3.289010000 | 8.458555000  | 1.218371000  |
| C | 2.592634000  | 6.550619000  | -0.118188000 |
| C | 2.530402000  | 8.085106000  | -0.132206000 |
| C | 1.043992000  | 8.478123000  | -0.027164000 |
| C | 3.305512000  | 8.658313000  | 1.069292000  |
| C | 3.119402000  | 8.624282000  | -1.449609000 |
| C | -2.601263000 | -6.505773000 | 0.153867000  |
| C | -2.538936000 | -8.040255000 | 0.168168000  |

|   |              |               |              |
|---|--------------|---------------|--------------|
| C | -3.128312000 | -8.579233000  | 1.485486000  |
| C | -3.313645000 | -8.613721000  | -1.033465000 |
| C | -1.052474000 | -8.433206000  | 0.063655000  |
| C | 4.874418000  | -7.017158000  | 0.181795000  |
| C | 4.111868000  | -8.348008000  | 0.111498000  |
| C | 3.278413000  | -8.414165000  | -1.182251000 |
| C | 3.197067000  | -8.499187000  | 1.341622000  |
| C | 5.166579000  | -9.471909000  | 0.107481000  |
| H | -5.552752000 | 6.955185000   | 0.716771000  |
| H | -5.485484000 | 7.014088000   | -1.064171000 |
| H | -5.844997000 | 9.435380000   | 0.793268000  |
| H | -5.790624000 | 9.492966000   | -0.980671000 |
| H | -4.685646000 | 10.495241000  | -0.025607000 |
| H | -3.785754000 | 8.509792000   | -2.236215000 |
| H | -2.455646000 | 7.747718000   | -1.343367000 |
| H | -2.679706000 | 9.505320000   | -1.273012000 |
| H | -3.928759000 | 8.364126000   | 2.104650000  |
| H | -2.762886000 | 9.417865000   | 1.284696000  |
| H | -2.542344000 | 7.658559000   | 1.252208000  |
| H | 2.043488000  | 6.137345000   | -0.974280000 |
| H | 2.150147000  | 6.155759000   | 0.805758000  |
| H | 0.939956000  | 9.568950000   | -0.038076000 |
| H | 0.596076000  | 8.108416000   | 0.903344000  |
| H | 0.462562000  | 8.078355000   | -0.866960000 |
| H | 2.894673000  | 8.289085000   | 2.017161000  |
| H | 3.239697000  | 9.752469000   | 1.078035000  |
| H | 4.363885000  | 8.381862000   | 1.027233000  |
| H | 2.567731000  | 8.238344000   | -2.315923000 |
| H | 4.170053000  | 8.337360000   | -1.560682000 |
| H | 3.061258000  | 9.718530000   | -1.474678000 |
| H | -2.052438000 | -6.092323000  | 1.010080000  |
| H | -2.158485000 | -6.111029000  | -0.769991000 |
| H | -2.576919000 | -8.193120000  | 2.351899000  |
| H | -3.070121000 | -9.673474000  | 1.510758000  |
| H | -4.179009000 | -8.292340000  | 1.596190000  |
| H | -4.372051000 | -8.337342000  | -0.991766000 |
| H | -3.247745000 | -9.707874000  | -1.042005000 |
| H | -2.902554000 | -8.244622000  | -1.981275000 |
| H | -0.471313000 | -8.033224000  | 0.903535000  |
| H | -0.604302000 | -8.063676000  | -0.866800000 |
| H | -0.948376000 | -9.524024000  | 0.074834000  |
| H | 5.476523000  | -6.969188000  | 1.098383000  |
| H | 5.542556000  | -6.910756000  | -0.682620000 |
| H | 2.752172000  | -9.373454000  | -1.247938000 |
| H | 3.917579000  | -8.320047000  | -2.068984000 |
| H | 2.531784000  | -7.614122000  | -1.215828000 |
| H | 2.446818000  | -7.702551000  | 1.379859000  |
| H | 3.777497000  | -8.464435000  | 2.272015000  |
| H | 2.670739000  | -9.460184000  | 1.309856000  |
| H | 5.834632000  | -9.390990000  | -0.758594000 |
| H | 4.675786000  | -10.450565000 | 0.061366000  |

|   |               |              |              |
|---|---------------|--------------|--------------|
| H | 5.781456000   | -9.448073000 | 1.015400000  |
| H | -4.782957000  | 0.721505000  | 5.161334000  |
| H | -7.243948000  | 0.775159000  | 5.707956000  |
| H | -4.091863000  | 0.374607000  | 2.796880000  |
| H | -10.182285000 | -0.449986000 | -2.113565000 |
| H | -11.434977000 | -0.152566000 | 0.007113000  |
| H | -7.169910000  | -0.920868000 | -5.658239000 |
| H | -4.716274000  | -0.783711000 | -5.093073000 |
| H | -4.055049000  | -0.416690000 | -2.723172000 |
| H | 7.229052000   | -0.731199000 | -5.676282000 |
| H | 8.864815000   | -0.436976000 | -3.830590000 |
| H | 11.425962000  | 0.196288000  | 0.020256000  |
| H | 10.175450000  | 0.493896000  | 2.142210000  |
| H | 8.821317000   | 0.727561000  | 3.852458000  |
| H | 7.166750000   | 0.965431000  | 5.689870000  |

Cartesian coordinates of DFT-optimized structure of **8a** complex by B3LYP/Def2-TZVP; 6-31G(d,p)/CH<sub>3</sub>CN, charge = 2, multiplicity = 1

|    |              |              |              |
|----|--------------|--------------|--------------|
| Os | 5.467858000  | 0.958425000  | 0.034981000  |
| N  | 5.331113000  | -1.103713000 | 0.373277000  |
| N  | 5.881237000  | 1.398070000  | 2.046569000  |
| N  | 7.487346000  | 1.284181000  | 0.000963000  |
| N  | 5.932627000  | 0.657012000  | -1.991054000 |
| C  | 5.000725000  | 1.439116000  | 3.072286000  |
| H  | 3.973340000  | 1.213896000  | 2.813640000  |
| C  | 5.370093000  | 1.745618000  | 4.374970000  |
| H  | 4.614990000  | 1.762590000  | 5.153158000  |
| C  | 6.709480000  | 2.025824000  | 4.651360000  |
| H  | 7.032447000  | 2.269509000  | 5.657945000  |
| C  | 7.628862000  | 1.986407000  | 3.608405000  |
| H  | 8.674886000  | 2.198731000  | 3.796358000  |
| C  | 7.208491000  | 1.672850000  | 2.313340000  |
| C  | 8.120954000  | 1.608889000  | 1.159410000  |
| C  | 9.498508000  | 1.837658000  | 1.156692000  |
| H  | 10.021740000 | 2.097257000  | 2.069509000  |
| C  | 10.200149000 | 1.726078000  | -0.045752000 |
| C  | 9.530300000  | 1.390838000  | -1.224568000 |
| H  | 10.078033000 | 1.306294000  | -2.155891000 |
| C  | 8.152141000  | 1.170373000  | -1.179742000 |
| C  | 7.269418000  | 0.812580000  | -2.302559000 |
| C  | 7.725189000  | 0.635459000  | -3.611351000 |
| H  | 8.778190000  | 0.761798000  | -3.834345000 |
| C  | 6.832187000  | 0.297874000  | -4.622886000 |
| H  | 7.183030000  | 0.158831000  | -5.639983000 |
| C  | 5.482517000  | 0.143393000  | -4.301258000 |
| H  | 4.746752000  | -0.118785000 | -5.053565000 |
| C  | 5.077548000  | 0.330250000  | -2.986552000 |
| H  | 4.040684000  | 0.221609000  | -2.692872000 |
| N  | 4.034848000  | -1.601731000 | 0.403409000  |

|    |               |              |              |
|----|---------------|--------------|--------------|
| C  | -3.005598000  | 0.779702000  | -0.179813000 |
| C  | 2.983524000   | -0.640510000 | 0.292540000  |
| C  | -3.512164000  | -0.504904000 | 0.040960000  |
| C  | 3.492025000   | 0.641438000  | 0.061046000  |
| C  | -2.622824000  | -1.558077000 | 0.276461000  |
| C  | 2.603613000   | 1.697734000  | -0.163718000 |
| C  | -1.233511000  | -1.349238000 | 0.411573000  |
| C  | 1.212253000   | 1.493814000  | -0.283889000 |
| C  | -0.720249000  | -0.043172000 | 0.063733000  |
| C  | 0.698499000   | 0.189031000  | 0.067805000  |
| C  | -1.621176000  | 1.030078000  | -0.292021000 |
| C  | 1.599390000   | -0.885588000 | 0.419698000  |
| C  | -1.053962000  | 2.244847000  | -0.791606000 |
| C  | 1.032015000   | -2.097846000 | 0.925168000  |
| H  | -1.693828000  | 2.987895000  | -1.249438000 |
| H  | 1.671785000   | -2.838982000 | 1.386131000  |
| C  | 0.290181000   | 2.464838000  | -0.787748000 |
| C  | -0.312117000  | -2.317835000 | 0.921312000  |
| H  | 0.662333000   | 3.373520000  | -1.242674000 |
| H  | -0.684804000  | -3.224678000 | 1.379368000  |
| H  | 11.270464000  | 1.900699000  | -0.064226000 |
| N  | -3.313474000  | -2.804398000 | 0.382347000  |
| N  | -4.700682000  | -2.745564000 | 0.344551000  |
| C  | -5.134439000  | -4.010577000 | 0.382079000  |
| C  | -4.052162000  | -4.903215000 | 0.423284000  |
| C  | -2.920300000  | -4.110954000 | 0.409431000  |
| H  | -6.195882000  | -4.210785000 | 0.364748000  |
| H  | -4.087566000  | -5.981802000 | 0.450424000  |
| H  | -1.881796000  | -4.390253000 | 0.382552000  |
| Os | -5.485784000  | -0.834304000 | 0.003612000  |
| C  | -5.668234000  | -0.060947000 | 4.343349000  |
| C  | -5.213182000  | -0.232522000 | 3.043023000  |
| N  | -6.028941000  | -0.551216000 | 2.012462000  |
| C  | -7.376003000  | -0.714155000 | 2.271597000  |
| C  | -7.881602000  | -0.552143000 | 3.564017000  |
| C  | -7.028579000  | -0.222617000 | 4.612031000  |
| C  | -8.214026000  | -1.064637000 | 1.112671000  |
| N  | -7.503527000  | -1.169334000 | -0.041940000 |
| C  | -8.090768000  | -1.488080000 | -1.226217000 |
| C  | -9.467021000  | -1.718479000 | -1.278907000 |
| C  | -10.215341000 | -1.615373000 | -0.104140000 |
| C  | -9.592589000  | -1.287008000 | 1.102084000  |
| C  | -7.133812000  | -1.544737000 | -2.343788000 |
| N  | -5.818934000  | -1.266298000 | -2.024712000 |
| C  | -4.898779000  | -1.302473000 | -3.015145000 |
| C  | -5.215732000  | -1.607458000 | -4.331918000 |
| C  | -6.542417000  | -1.891020000 | -4.661189000 |
| C  | -7.502053000  | -1.856695000 | -3.654939000 |
| H  | -4.166182000  | -0.118221000 | 2.790301000  |
| H  | -4.962284000  | 0.195171000  | 5.125709000  |
| H  | -7.417975000  | -0.095519000 | 5.616581000  |

|   |               |              |              |
|---|---------------|--------------|--------------|
| H | -8.941763000  | -0.684549000 | 3.745950000  |
| H | -10.176347000 | -1.208610000 | 2.011743000  |
| H | -11.285352000 | -1.791100000 | -0.128719000 |
| H | -9.954031000  | -1.972401000 | -2.213182000 |
| H | -8.539130000  | -2.072438000 | -3.883902000 |
| H | -6.824967000  | -2.133704000 | -5.680100000 |
| H | -4.430606000  | -1.620686000 | -5.079886000 |
| H | -3.883034000  | -1.075160000 | -2.715600000 |
| N | -4.059145000  | 1.735974000  | -0.309265000 |
| N | -5.352893000  | 1.230925000  | -0.317577000 |
| C | -6.171455000  | 2.287923000  | -0.368841000 |
| C | -5.435698000  | 3.483182000  | -0.373200000 |
| C | -4.109293000  | 3.099629000  | -0.321937000 |
| N | 4.685323000   | 2.873825000  | -0.288825000 |
| H | -3.218127000  | 3.699053000  | -0.259305000 |
| H | -5.817589000  | 4.492510000  | -0.400702000 |
| H | -7.240562000  | 2.133692000  | -0.386928000 |
| N | 3.298047000   | 2.940089000  | -0.288171000 |
| C | 5.124495000   | 4.136669000  | -0.336459000 |
| C | 4.046132000   | 5.035024000  | -0.345976000 |
| C | 2.910937000   | 4.248595000  | -0.301768000 |
| C | 4.078552000   | -2.965487000 | 0.429484000  |
| C | 5.403826000   | -3.355603000 | 0.450371000  |
| C | 6.145289000   | -2.164484000 | 0.414373000  |
| H | 4.086488000   | 6.113460000  | -0.372233000 |
| H | 1.874843000   | 4.532600000  | -0.244664000 |
| H | 6.187073000   | 4.331318000  | -0.348443000 |
| H | 7.215257000   | -2.015865000 | 0.403145000  |
| H | 5.781076000   | -4.366652000 | 0.478692000  |
| H | 3.183428000   | -3.561242000 | 0.397079000  |

Cartesian coordinates of DFT-optimized structure of **9a** complex by B3LYP/Def2-TZVP;  
6-31G(d,p)/CH<sub>3</sub>CN, charge = 2, multiplicity = 1

|    |             |              |              |
|----|-------------|--------------|--------------|
| Os | 5.546537000 | 0.888252000  | -0.247746000 |
| N  | 5.423105000 | -1.175463000 | 0.171897000  |
| N  | 5.966133000 | 1.407112000  | 1.738836000  |
| N  | 7.569334000 | 1.190367000  | -0.291846000 |
| N  | 6.012967000 | 0.506669000  | -2.255093000 |
| C  | 5.081098000 | 1.505440000  | 2.758781000  |
| H  | 4.051790000 | 1.286137000  | 2.503205000  |
| C  | 5.449215000 | 1.861475000  | 4.048236000  |
| H  | 4.690913000 | 1.922818000  | 4.821128000  |
| C  | 6.792137000 | 2.134134000  | 4.319964000  |
| H  | 7.113707000 | 2.415211000  | 5.317232000  |
| C  | 7.714820000 | 2.039193000  | 3.284549000  |
| H  | 8.762705000 | 2.246769000  | 3.467714000  |
| C  | 7.296639000 | 1.676325000  | 2.000897000  |
| C  | 8.210036000 | 1.552370000  | 0.855354000  |
| C  | 9.591029000 | 1.758169000  | 0.845649000  |

|   |              |              |              |
|---|--------------|--------------|--------------|
| H | 10.116823000 | 2.045930000  | 1.748695000  |
| C | 10.293810000 | 1.587143000  | -0.349540000 |
| C | 9.620022000  | 1.216075000  | -1.515657000 |
| H | 10.167859000 | 1.084301000  | -2.441586000 |
| C | 8.238429000  | 1.019868000  | -1.466842000 |
| C | 7.352109000  | 0.633476000  | -2.574372000 |
| C | 7.802703000  | 0.404890000  | -3.877851000 |
| H | 8.856975000  | 0.510358000  | -4.106009000 |
| C | 6.904140000  | 0.044478000  | -4.875402000 |
| H | 7.250752000  | -0.133408000 | -5.887910000 |
| C | 5.552476000  | -0.082604000 | -4.545874000 |
| H | 4.812371000  | -0.362404000 | -5.287580000 |
| C | 5.151960000  | 0.154307000  | -3.238814000 |
| H | 4.115076000  | 0.067130000  | -2.938687000 |
| C | 6.477135000  | -2.019488000 | 0.263518000  |
| H | 7.456025000  | -1.554887000 | 0.239480000  |
| C | 6.357108000  | -3.388784000 | 0.370098000  |
| H | 7.233476000  | -4.022410000 | 0.439844000  |
| C | 5.068512000  | -3.950447000 | 0.349940000  |
| C | 3.967068000  | -3.094844000 | 0.269454000  |
| H | 2.969878000  | -3.500082000 | 0.204154000  |
| C | 4.142520000  | -1.701880000 | 0.220305000  |
| C | -2.922919000 | 0.731188000  | -0.513190000 |
| C | 3.073417000  | -0.700508000 | 0.108858000  |
| C | -3.441379000 | -0.505409000 | -0.115572000 |
| C | 3.575571000  | 0.584582000  | -0.209847000 |
| C | -2.562099000 | -1.523144000 | 0.267087000  |
| C | 2.699089000  | 1.655296000  | -0.508337000 |
| C | -1.169169000 | -1.312189000 | 0.367785000  |
| C | 1.306426000  | 1.406199000  | -0.643413000 |
| C | -0.645198000 | -0.069582000 | -0.149279000 |
| C | 0.776561000  | 0.150574000  | -0.169126000 |
| C | -1.534717000 | 0.953748000  | -0.647127000 |
| C | 1.674122000  | -0.882984000 | 0.285850000  |
| C | -0.950094000 | 2.087228000  | -1.294649000 |
| C | 1.095217000  | -2.006125000 | 0.958052000  |
| H | -1.576511000 | 2.765092000  | -1.859902000 |
| H | 1.736474000  | -2.684580000 | 1.506882000  |
| C | 0.396140000  | 2.302264000  | -1.289279000 |
| C | -0.252396000 | -2.209699000 | 0.999443000  |
| H | 0.786922000  | 3.145210000  | -1.845316000 |
| H | -0.628963000 | -3.039809000 | 1.582992000  |
| O | 5.000019000  | -5.294988000 | 0.401991000  |
| C | 3.714713000  | -5.941326000 | 0.371663000  |
| C | 3.913272000  | -7.461589000 | 0.460126000  |
| C | 2.513347000  | -8.104476000 | 0.414563000  |
| C | 4.751247000  | -7.956727000 | -0.733945000 |
| C | 4.609857000  | -7.826701000 | 1.784728000  |
| H | 3.113067000  | -5.582454000 | 1.217072000  |
| H | 3.201686000  | -5.674630000 | -0.561573000 |
| H | 2.596696000  | -9.195187000 | 0.478968000  |

|    |               |              |              |
|----|---------------|--------------|--------------|
| H  | 1.991579000   | -7.863050000 | -0.519526000 |
| H  | 1.889154000   | -7.766185000 | 1.250631000  |
| H  | 4.267873000   | -7.707105000 | -1.686680000 |
| H  | 4.868133000   | -9.045836000 | -0.691794000 |
| H  | 5.749651000   | -7.507835000 | -0.731859000 |
| H  | 4.018261000   | -7.493522000 | 2.646572000  |
| H  | 5.599727000   | -7.364213000 | 1.852765000  |
| H  | 4.735436000   | -8.912779000 | 1.863159000  |
| H  | 11.366884000  | 1.743202000  | -0.372197000 |
| N  | -3.264910000  | -2.733406000 | 0.552402000  |
| N  | -4.652045000  | -2.665180000 | 0.512970000  |
| C  | -5.098667000  | -3.906143000 | 0.736033000  |
| C  | -4.025523000  | -4.795557000 | 0.901911000  |
| C  | -2.885564000  | -4.026765000 | 0.768229000  |
| H  | -6.162234000  | -4.094599000 | 0.752259000  |
| H  | -4.072308000  | -5.858306000 | 1.085460000  |
| H  | -1.850442000  | -4.319039000 | 0.778000000  |
| Os | -5.418819000  | -0.816810000 | -0.099183000 |
| C  | -5.566172000  | 0.595527000  | 4.077872000  |
| C  | -5.120837000  | 0.227278000  | 2.815520000  |
| N  | -5.945416000  | -0.235781000 | 1.848608000  |
| C  | -7.292278000  | -0.344796000 | 2.135843000  |
| C  | -7.788373000  | 0.013987000  | 3.391692000  |
| C  | -6.926033000  | 0.488066000  | 4.374626000  |
| C  | -8.141172000  | -0.855735000 | 1.046817000  |
| N  | -7.439999000  | -1.135655000 | -0.084016000 |
| C  | -8.038040000  | -1.620322000 | -1.204710000 |
| C  | -9.416314000  | -1.844616000 | -1.214597000 |
| C  | -10.155232000 | -1.563340000 | -0.063226000 |
| C  | -9.521363000  | -1.065812000 | 1.077645000  |
| C  | -7.089516000  | -1.847630000 | -2.307361000 |
| N  | -5.770389000  | -1.536404000 | -2.040292000 |
| C  | -4.858187000  | -1.724077000 | -3.021163000 |
| C  | -5.187617000  | -2.213397000 | -4.277917000 |
| C  | -6.518788000  | -2.530547000 | -4.554074000 |
| C  | -7.470135000  | -2.343522000 | -3.556861000 |
| H  | -4.074996000  | 0.295961000  | 2.542402000  |
| H  | -4.853211000  | 0.960008000  | 4.809240000  |
| H  | -7.308104000  | 0.767472000  | 5.350804000  |
| H  | -8.848584000  | -0.078850000 | 3.596107000  |
| H  | -10.098123000 | -0.849691000 | 1.969325000  |
| H  | -11.226602000 | -1.732203000 | -0.054949000 |
| H  | -9.911915000  | -2.230009000 | -2.097976000 |
| H  | -8.510430000  | -2.581817000 | -3.744948000 |
| H  | -6.810987000  | -2.915338000 | -5.525425000 |
| H  | -4.408334000  | -2.341180000 | -5.021182000 |
| H  | -3.838082000  | -1.466143000 | -2.764434000 |
| N  | -3.968046000  | 1.667848000  | -0.779382000 |
| N  | -5.266719000  | 1.177717000  | -0.716726000 |
| C  | -6.075780000  | 2.222327000  | -0.925343000 |
| C  | -5.329732000  | 3.397880000  | -1.104006000 |

|   |              |              |              |
|---|--------------|--------------|--------------|
| C | -4.006892000 | 3.015358000  | -0.993790000 |
| C | 3.410032000  | 2.934071000  | -0.649145000 |
| N | 4.797542000  | 2.821001000  | -0.645787000 |
| C | 5.537927000  | 3.940318000  | -0.761515000 |
| C | 5.011638000  | 5.219787000  | -0.853848000 |
| C | 3.617511000  | 5.359267000  | -0.790525000 |
| C | 2.832434000  | 4.204661000  | -0.683209000 |
| O | 2.952908000  | 6.531122000  | -0.814664000 |
| C | 3.697506000  | 7.760552000  | -0.899320000 |
| C | 2.719681000  | 8.944415000  | -0.878184000 |
| C | 3.564920000  | 10.229904000 | -0.971116000 |
| C | 1.917064000  | 8.944354000  | 0.436699000  |
| C | 1.763716000  | 8.863093000  | -2.083305000 |
| H | 4.281962000  | 7.761771000  | -1.828597000 |
| H | 4.390050000  | 7.818853000  | -0.049657000 |
| H | 4.153335000  | 10.256906000 | -1.896413000 |
| H | 4.257406000  | 10.317137000 | -0.124934000 |
| H | 2.914170000  | 11.111597000 | -0.962769000 |
| H | 2.583142000  | 9.009454000  | 1.306047000  |
| H | 1.317766000  | 8.033645000  | 0.535778000  |
| H | 1.237827000  | 9.804031000  | 0.468886000  |
| H | 2.318908000  | 8.873655000  | -3.029458000 |
| H | 1.079328000  | 9.719337000  | -2.085734000 |
| H | 1.163168000  | 7.948351000  | -2.052089000 |
| H | 5.682006000  | 6.064008000  | -0.946366000 |
| H | 6.612159000  | 3.795021000  | -0.769083000 |
| H | 1.762985000  | 4.329466000  | -0.591209000 |
| H | -3.111233000 | 3.610698000  | -1.018372000 |
| H | -5.703141000 | 4.395267000  | -1.280400000 |
| H | -7.146183000 | 2.076200000  | -0.923652000 |

Cartesian coordinates of DFT-optimized structure of **10a** complex by B3LYP/Def2-TZVP;  
6-31G(d,p)/CH<sub>3</sub>CN, charge = 2, multiplicity = 1

|    |              |              |              |
|----|--------------|--------------|--------------|
| Os | -2.325683000 | -1.311965000 | 0.059560000  |
| N  | -3.061700000 | 0.652485000  | 0.276067000  |
| N  | -2.570052000 | -1.778548000 | 2.090816000  |
| N  | -4.033096000 | -2.438454000 | 0.044052000  |
| N  | -2.831183000 | -1.329170000 | -1.976380000 |
| C  | -1.778314000 | -1.394390000 | 3.118739000  |
| H  | -0.931349000 | -0.776320000 | 2.847462000  |
| C  | -2.019740000 | -1.757093000 | 4.436473000  |
| H  | -1.345371000 | -1.417199000 | 5.214812000  |
| C  | -3.128538000 | -2.554302000 | 4.728302000  |
| H  | -3.346071000 | -2.856526000 | 5.747280000  |
| C  | -3.955191000 | -2.955204000 | 3.684562000  |
| H  | -4.823805000 | -3.571969000 | 3.883614000  |
| C  | -3.671414000 | -2.564299000 | 2.373284000  |
| C  | -4.500865000 | -2.943294000 | 1.218586000  |
| C  | -5.655856000 | -3.728105000 | 1.226542000  |

|   |              |              |              |
|---|--------------|--------------|--------------|
| H | -6.043190000 | -4.138951000 | 2.151696000  |
| C | -6.311924000 | -3.979818000 | 0.019294000  |
| C | -5.816051000 | -3.452807000 | -1.175514000 |
| H | -6.326630000 | -3.651665000 | -2.110622000 |
| C | -4.658151000 | -2.673269000 | -1.142295000 |
| C | -3.977286000 | -2.038310000 | -2.281507000 |
| C | -4.433964000 | -2.129126000 | -3.599220000 |
| H | -5.334895000 | -2.690903000 | -3.816588000 |
| C | -3.736502000 | -1.501405000 | -4.625517000 |
| H | -4.088235000 | -1.569880000 | -5.649495000 |
| C | -2.579835000 | -0.785206000 | -4.309855000 |
| H | -2.001109000 | -0.277851000 | -5.073887000 |
| C | -2.165089000 | -0.723966000 | -2.986863000 |
| H | -1.274021000 | -0.180767000 | -2.697098000 |
| C | -4.369742000 | 1.000294000  | 0.269247000  |
| H | -5.075354000 | 0.177778000  | 0.282088000  |
| C | -4.818450000 | 2.303636000  | 0.236422000  |
| H | -5.878475000 | 2.528795000  | 0.231381000  |
| C | -3.867613000 | 3.336758000  | 0.174831000  |
| C | -2.511791000 | 2.998837000  | 0.194818000  |
| H | -1.762608000 | 3.767867000  | 0.097912000  |
| C | -2.106255000 | 1.657830000  | 0.285260000  |
| C | 5.436941000  | 2.134756000  | 0.150680000  |
| C | -0.716004000 | 1.174528000  | 0.291363000  |
| C | 5.373186000  | 3.531634000  | 0.349579000  |
| C | -0.652217000 | -0.222357000 | 0.092508000  |
| C | 4.131114000  | 4.161857000  | 0.510936000  |
| C | 0.589832000  | -0.852516000 | -0.069204000 |
| C | 2.927987000  | 3.433411000  | 0.601419000  |
| C | 1.792931000  | -0.124025000 | -0.159860000 |
| C | 2.973040000  | 2.030939000  | 0.252443000  |
| C | 1.747870000  | 1.278442000  | 0.189149000  |
| C | 4.233973000  | 1.394005000  | -0.032991000 |
| C | 0.486951000  | 1.915360000  | 0.474709000  |
| C | 4.190320000  | 0.066633000  | -0.567673000 |
| C | 0.530611000  | 3.242786000  | 1.009272000  |
| H | 5.085960000  | -0.361209000 | -0.999687000 |
| H | -0.365021000 | 3.670651000  | 1.441280000  |
| C | 3.036387000  | -0.657294000 | -0.622846000 |
| C | 1.684526000  | 3.966741000  | 1.064328000  |
| H | 3.060429000  | -1.631451000 | -1.094768000 |
| H | 1.660505000  | 4.940962000  | 1.536128000  |
| O | -4.348370000 | 4.591983000  | 0.090771000  |
| C | -3.431815000 | 5.700582000  | 0.034343000  |
| C | -4.229641000 | 7.010380000  | -0.042047000 |
| C | -3.205426000 | 8.160846000  | -0.097497000 |
| C | -5.098843000 | 7.026187000  | -1.313773000 |
| C | -5.115580000 | 7.163713000  | 1.208754000  |
| H | -2.799081000 | 5.687019000  | 0.931651000  |
| H | -2.789990000 | 5.590656000  | -0.849397000 |
| H | -3.723318000 | 9.124889000  | -0.153792000 |

|   |              |              |              |
|---|--------------|--------------|--------------|
| H | -2.555613000 | 8.077544000  | -0.977255000 |
| H | -2.568998000 | 8.174350000  | 0.795790000  |
| H | -4.481565000 | 6.928145000  | -2.215479000 |
| H | -5.651950000 | 7.969722000  | -1.386258000 |
| H | -5.824379000 | 6.206431000  | -1.308153000 |
| H | -4.509772000 | 7.164786000  | 2.123395000  |
| H | -5.842029000 | 6.348189000  | 1.283508000  |
| H | -5.668870000 | 8.109194000  | 1.171103000  |
| H | -7.210045000 | -4.587825000 | 0.009467000  |
| N | 0.457431000  | -2.271464000 | -0.155067000 |
| C | 1.337948000  | -3.313542000 | -0.117781000 |
| C | 0.614370000  | -4.490859000 | -0.139255000 |
| C | -0.733706000 | -4.101383000 | -0.169920000 |
| N | -0.837438000 | -2.767184000 | -0.167390000 |
| H | -1.628847000 | -4.706235000 | -0.180766000 |
| H | 1.010399000  | -5.495037000 | -0.125400000 |
| H | 2.399460000  | -3.154454000 | -0.045130000 |
| N | 4.263537000  | 5.580781000  | 0.596920000  |
| N | 5.558427000  | 6.076447000  | 0.609928000  |
| C | 5.454730000  | 7.410650000  | 0.612045000  |
| C | 4.106684000  | 7.800169000  | 0.580423000  |
| C | 3.383076000  | 6.622878000  | 0.558813000  |
| C | 6.827158000  | 1.651348000  | 0.157269000  |
| C | 7.232594000  | 0.310294000  | 0.247455000  |
| C | 8.588387000  | -0.027707000 | 0.267882000  |
| C | 9.539308000  | 1.005379000  | 0.207072000  |
| C | 9.090684000  | 2.308759000  | 0.174497000  |
| N | 7.782664000  | 2.656635000  | 0.167188000  |
| O | 9.069019000  | -1.282995000 | 0.351713000  |
| C | 8.152358000  | -2.391562000 | 0.407015000  |
| C | 8.950043000  | -3.701475000 | 0.482863000  |
| C | 7.925704000  | -4.851889000 | 0.537185000  |
| C | 9.836442000  | -3.854074000 | -0.767699000 |
| C | 9.818759000  | -3.718184000 | 1.754910000  |
| H | 6.349879000  | 8.015484000  | 0.623278000  |
| H | 3.710700000  | 8.804358000  | 0.566102000  |
| H | 2.321596000  | 6.463781000  | 0.485629000  |
| H | 6.483341000  | -0.458734000 | 0.343827000  |
| H | 10.599319000 | 0.780161000  | 0.212499000  |
| H | 9.796351000  | 3.131234000  | 0.162253000  |
| H | 7.519994000  | -2.377343000 | -0.490546000 |
| H | 7.510166000  | -2.282178000 | 1.290558000  |
| H | 7.275555000  | -4.769094000 | 1.416746000  |
| H | 8.443494000  | -5.816009000 | 0.593072000  |
| H | 7.289612000  | -4.864775000 | -0.356353000 |
| H | 9.230986000  | -3.854471000 | -1.682574000 |
| H | 10.389621000 | -4.799635000 | -0.730464000 |
| H | 10.562994000 | -3.038569000 | -0.841629000 |
| H | 9.201143000  | -3.620675000 | 2.656440000  |
| H | 10.544361000 | -2.898481000 | 1.750096000  |
| H | 10.371764000 | -4.661808000 | 1.826991000  |

|    |              |             |              |
|----|--------------|-------------|--------------|
| Os | 7.046718000  | 4.621100000 | 0.383769000  |
| C  | 7.297495000  | 4.092867000 | 4.753169000  |
| C  | 6.883799000  | 4.032061000 | 3.429827000  |
| N  | 7.550699000  | 4.637608000 | 2.420079000  |
| C  | 8.696585000  | 5.346610000 | 2.726336000  |
| C  | 9.152188000  | 5.437025000 | 4.044449000  |
| C  | 8.453891000  | 4.808986000 | 5.069984000  |
| C  | 9.378377000  | 5.981850000 | 1.587848000  |
| N  | 8.754232000  | 5.747422000 | 0.400944000  |
| C  | 9.222967000  | 6.252551000 | -0.773071000 |
| C  | 10.378049000 | 7.037239000 | -0.779915000 |
| C  | 11.033202000 | 7.288546000 | 0.427919000  |
| C  | 10.536335000 | 6.761251000 | 1.622186000  |
| C  | 8.394395000  | 5.873962000 | -1.928536000 |
| N  | 7.292743000  | 5.088232000 | -1.647166000 |
| C  | 6.501824000  | 4.704376000 | -2.675828000 |
| C  | 6.744356000  | 5.067398000 | -3.993277000 |
| C  | 7.853438000  | 5.864614000 | -4.283989000 |
| C  | 8.679266000  | 6.265191000 | -3.239475000 |
| H  | 5.992957000  | 3.488963000 | 3.139179000  |
| H  | 6.718168000  | 3.585250000 | 5.516572000  |
| H  | 8.804790000  | 4.877167000 | 6.094268000  |
| H  | 10.052944000 | 5.998730000 | 4.262727000  |
| H  | 11.046196000 | 6.959803000 | 2.557753000  |
| H  | 11.931379000 | 7.896454000 | 0.438623000  |
| H  | 10.766131000 | 7.448292000 | -1.704663000 |
| H  | 9.548083000  | 6.881952000 | -3.437656000 |
| H  | 8.071821000  | 6.167099000 | -5.302708000 |
| H  | 6.070607000  | 4.727738000 | -4.772255000 |
| H  | 5.654599000  | 4.086289000 | -2.405408000 |

Cartesian coordinates of DFT-optimized structure of **11a** complex by B3LYP/Def2-TZVP; 6-31G(d,p)/CH<sub>3</sub>CN, charge = 2, multiplicity = 1

|    |              |              |              |
|----|--------------|--------------|--------------|
| Os | 2.896711000  | 0.434224000  | 0.036746000  |
| N  | 1.753851000  | -1.326503000 | 0.235599000  |
| N  | 3.356598000  | 0.535523000  | 2.081363000  |
| N  | 4.822511000  | -0.257040000 | 0.086082000  |
| N  | 3.273668000  | 0.017709000  | -1.984110000 |
| N  | -7.804107000 | 2.417875000  | 0.024858000  |
| C  | 2.543617000  | 0.949674000  | 3.080764000  |
| H  | 1.552420000  | 1.260782000  | 2.774763000  |
| C  | 2.935937000  | 0.980905000  | 4.411628000  |
| H  | 2.236241000  | 1.324565000  | 5.165569000  |
| C  | 4.227171000  | 0.568739000  | 4.747970000  |
| H  | 4.566060000  | 0.580478000  | 5.778476000  |
| C  | 5.076148000  | 0.140045000  | 3.733625000  |
| H  | 6.083015000  | -0.185867000 | 3.967331000  |
| C  | 4.635467000  | 0.125893000  | 2.407405000  |
| C  | 5.471697000  | -0.317319000 | 1.280958000  |

|   |               |              |              |
|---|---------------|--------------|--------------|
| C | 6.793426000   | -0.764819000 | 1.332094000  |
| H | 7.327058000   | -0.817458000 | 2.273939000  |
| C | 7.425605000   | -1.145741000 | 0.146219000  |
| C | 6.742088000   | -1.077729000 | -1.070064000 |
| H | 7.236302000   | -1.372511000 | -1.988453000 |
| C | 5.421472000   | -0.624221000 | -1.079887000 |
| C | 4.537632000   | -0.475464000 | -2.246852000 |
| C | 4.921933000   | -0.803524000 | -3.549813000 |
| H | 5.917715000   | -1.189791000 | -3.733732000 |
| C | 4.030834000   | -0.637708000 | -4.604374000 |
| H | 4.326238000   | -0.891338000 | -5.616961000 |
| C | 2.754210000   | -0.141925000 | -4.331393000 |
| H | 2.022342000   | 0.003403000  | -5.118377000 |
| C | 2.418086000   | 0.169870000  | -3.021385000 |
| H | 1.438976000   | 0.555025000  | -2.764462000 |
| C | 2.257896000   | -2.581898000 | 0.276979000  |
| H | 3.337681000   | -2.652940000 | 0.338211000  |
| C | 1.484255000   | -3.722313000 | 0.234770000  |
| H | 1.937414000   | -4.706022000 | 0.270817000  |
| C | 0.091530000   | -3.580826000 | 0.108437000  |
| C | -0.449786000  | -2.293154000 | 0.076220000  |
| H | -1.508956000  | -2.155468000 | -0.070213000 |
| C | 0.377121000   | -1.162967000 | 0.180595000  |
| C | -4.481265000  | 4.564948000  | -0.306666000 |
| C | -0.066382000  | 0.238874000  | 0.143428000  |
| C | -5.589109000  | 3.716457000  | -0.146222000 |
| C | 1.022387000   | 1.122786000  | -0.006293000 |
| C | -5.396940000  | 2.331016000  | 0.026641000  |
| C | 0.793130000   | 2.495175000  | -0.198741000 |
| C | -6.674176000  | 1.601109000  | 0.022037000  |
| C | -6.837460000  | 0.218542000  | -0.075721000 |
| H | -5.982273000  | -0.433914000 | -0.176070000 |
| C | -8.109521000  | -0.366998000 | -0.092848000 |
| C | -9.233573000  | 0.468175000  | -0.019736000 |
| H | -10.246959000 | 0.089192000  | -0.018001000 |
| C | -9.019761000  | 1.837669000  | 0.020146000  |
| H | -9.864711000  | 2.516582000  | 0.038269000  |
| C | -4.075873000  | 1.814697000  | 0.181130000  |
| C | -0.500476000  | 3.019029000  | -0.374456000 |
| C | -2.956418000  | 2.671871000  | -0.113376000 |
| C | -1.617603000  | 2.146055000  | -0.085000000 |
| C | -3.170936000  | 4.067377000  | -0.428930000 |
| C | -1.391348000  | 0.761276000  | 0.240845000  |
| C | -2.051082000  | 4.831802000  | -0.892519000 |
| C | -2.510696000  | 0.016472000  | 0.724867000  |
| H | -2.213461000  | 5.806026000  | -1.335898000 |
| H | -2.347146000  | -0.946964000 | 1.191048000  |
| C | -0.784484000  | 4.334317000  | -0.867256000 |
| C | -3.782096000  | 0.514304000  | 0.694609000  |
| H | 0.012580000   | 4.931797000  | -1.291360000 |
| H | -4.576650000  | -0.075081000 | 1.134597000  |

|   |               |              |              |
|---|---------------|--------------|--------------|
| O | -0.621214000  | -4.720261000 | 0.018873000  |
| O | -8.144462000  | -1.710240000 | -0.189166000 |
| C | -9.418225000  | -2.380841000 | -0.225420000 |
| C | -9.187471000  | -3.892597000 | -0.365223000 |
| C | -10.576267000 | -4.560384000 | -0.395701000 |
| C | -8.383959000  | -4.419772000 | 0.838653000  |
| C | -8.437165000  | -4.194324000 | -1.676409000 |
| C | -2.053244000  | -4.653972000 | -0.109284000 |
| C | -2.621343000  | -6.079894000 | -0.154805000 |
| C | -4.150709000  | -5.953285000 | -0.299110000 |
| C | -2.046800000  | -6.840861000 | -1.364717000 |
| C | -2.282544000  | -6.825124000 | 1.150116000  |
| H | -9.999308000  | -2.000505000 | -1.075478000 |
| H | -9.965194000  | -2.159450000 | 0.700266000  |
| H | -11.173987000 | -4.205389000 | -1.244151000 |
| H | -11.138370000 | -4.358756000 | 0.524356000  |
| H | -10.471145000 | -5.646900000 | -0.492144000 |
| H | -8.908441000  | -4.221495000 | 1.781607000  |
| H | -7.396905000  | -3.949233000 | 0.893442000  |
| H | -8.240029000  | -5.503238000 | 0.755621000  |
| H | -8.999088000  | -3.831324000 | -2.545952000 |
| H | -8.296199000  | -5.274843000 | -1.794929000 |
| H | -7.450683000  | -3.719675000 | -1.687626000 |
| H | -2.464057000  | -4.104045000 | 0.747528000  |
| H | -2.306035000  | -4.110349000 | -1.028911000 |
| H | -4.610415000  | -6.947467000 | -0.332204000 |
| H | -4.423936000  | -5.427094000 | -1.221910000 |
| H | -4.590191000  | -5.409043000 | 0.545874000  |
| H | -2.283664000  | -6.326206000 | -2.304212000 |
| H | -2.472571000  | -7.849569000 | -1.417680000 |
| H | -0.958459000  | -6.935212000 | -1.294111000 |
| H | -2.697142000  | -6.303262000 | 2.021611000  |
| H | -1.199985000  | -6.910485000 | 1.288374000  |
| H | -2.704282000  | -7.836698000 | 1.132197000  |
| H | 8.452144000   | -1.495093000 | 0.169785000  |
| N | 2.012917000   | 3.236636000  | -0.231423000 |
| C | 2.319742000   | 4.565297000  | -0.173253000 |
| C | 3.695586000   | 4.689283000  | -0.138154000 |
| C | 4.190221000   | 3.375705000  | -0.155485000 |
| N | 3.183906000   | 2.494943000  | -0.198238000 |
| N | -4.870074000  | 5.937517000  | -0.366936000 |
| C | -4.193805000  | 7.121402000  | -0.303995000 |
| C | -5.119119000  | 8.147639000  | -0.309756000 |
| C | -6.373874000  | 7.520071000  | -0.356433000 |
| N | -6.233538000  | 6.189554000  | -0.377701000 |
| H | 5.209762000   | 3.019728000  | -0.126535000 |
| H | 4.262630000   | 5.606920000  | -0.095858000 |
| H | 1.554965000   | 5.320510000  | -0.125281000 |
| H | -3.121376000  | 7.156740000  | -0.225314000 |
| H | -4.912420000  | 9.206625000  | -0.274983000 |
| H | -7.363549000  | 7.953167000  | -0.363276000 |

|    |               |             |              |
|----|---------------|-------------|--------------|
| Os | -7.432977000  | 4.486056000 | -0.169640000 |
| C  | -7.225188000  | 4.911689000 | 4.214602000  |
| C  | -6.917655000  | 4.621197000 | 2.892811000  |
| N  | -7.761843000  | 4.874359000 | 1.866016000  |
| C  | -8.985836000  | 5.447990000 | 2.153379000  |
| C  | -9.340301000  | 5.758838000 | 3.469029000  |
| C  | -8.459980000  | 5.492488000 | 4.511890000  |
| C  | -9.863736000  | 5.695117000 | 0.998861000  |
| C  | -11.135262000 | 6.272210000 | 1.010340000  |
| C  | -11.820110000 | 6.425555000 | -0.197345000 |
| C  | -11.237777000 | 6.006466000 | -1.395880000 |
| C  | -9.964524000  | 5.434128000 | -1.365927000 |
| N  | -9.312249000  | 5.294210000 | -0.179299000 |
| C  | -9.182489000  | 4.936470000 | -2.508790000 |
| N  | -7.931328000  | 4.433455000 | -2.206651000 |
| C  | -7.171249000  | 3.957658000 | -3.219966000 |
| C  | -7.589699000  | 3.955952000 | -4.543286000 |
| C  | -8.851836000  | 4.465313000 | -4.855993000 |
| C  | -9.647557000  | 4.955911000 | -3.826504000 |
| H  | -6.503832000  | 4.684662000 | 4.991926000  |
| H  | -5.972256000  | 4.170982000 | 2.616410000  |
| H  | -10.305565000 | 6.207893000 | 3.671921000  |
| H  | -8.732193000  | 5.732383000 | 5.534284000  |
| H  | -11.589674000 | 6.599011000 | 1.938482000  |
| H  | -12.808307000 | 6.872532000 | -0.204590000 |
| H  | -11.771765000 | 6.128153000 | -2.331144000 |
| H  | -6.201153000  | 3.571417000 | -2.932146000 |
| H  | -6.932368000  | 3.560214000 | -5.309700000 |
| H  | -9.209873000  | 4.479204000 | -5.879983000 |
| H  | -10.632421000 | 5.353891000 | -4.041418000 |

Cartesian coordinates of DFT-optimized structure of **7b** complex by B3LYP/Def2-TZVP;  
6-31G(d,p)/CH<sub>3</sub>CN, charge = 2, multiplicity = 1

|    |              |              |              |
|----|--------------|--------------|--------------|
| Ru | -5.528947000 | -0.048614000 | 0.031325000  |
| Ru | 5.519871000  | 0.093238000  | 0.002517000  |
| N  | -5.076800000 | -2.087723000 | 0.301778000  |
| N  | 5.067737000  | 2.132368000  | -0.267859000 |
| N  | -5.983851000 | 0.247450000  | 2.054640000  |
| N  | 5.974280000  | -0.202880000 | -2.020890000 |
| N  | -7.569508000 | -0.076491000 | 0.018706000  |
| N  | 7.560441000  | 0.121056000  | 0.014648000  |
| N  | -5.950729000 | -0.357291000 | -1.999260000 |
| N  | 5.942158000  | 0.401910000  | 2.032999000  |
| N  | -5.134994000 | 2.002972000  | -0.234019000 |
| N  | 5.125900000  | -1.958317000 | 0.268004000  |
| C  | -5.108893000 | 0.408645000  | 3.067901000  |
| C  | 5.099073000  | -0.364087000 | -3.033934000 |
| H  | 4.052270000  | -0.332824000 | -2.755968000 |
| C  | -5.504589000 | 0.602553000  | 4.386522000  |

|   |               |              |              |
|---|---------------|--------------|--------------|
| C | 5.494443000   | -0.558064000 | -4.352643000 |
| H | 4.742379000   | -0.682118000 | -5.124090000 |
| C | -6.867421000  | 0.633104000  | 4.683909000  |
| C | 6.857201000   | -0.588676000 | -4.650360000 |
| C | -7.782766000  | 0.467982000  | 3.648811000  |
| C | 7.772800000   | -0.423537000 | -3.615489000 |
| H | -8.846788000  | 0.487513000  | 3.853965000  |
| C | -7.329971000  | 0.276158000  | 2.340709000  |
| C | 7.320331000   | -0.231638000 | -2.307287000 |
| C | -8.233637000  | 0.090918000  | 1.188334000  |
| C | 8.224282000   | -0.046381000 | -1.155140000 |
| C | -9.630826000  | 0.071590000  | 1.205243000  |
| C | 9.621467000   | -0.027036000 | -1.172395000 |
| H | -10.181878000 | 0.203278000  | 2.129202000  |
| H | 10.172295000  | -0.158731000 | -2.096487000 |
| C | -10.315264000 | -0.122786000 | 0.003189000  |
| C | 10.306201000  | 0.167374000  | 0.029486000  |
| C | -9.611303000  | -0.294463000 | -1.190940000 |
| C | 9.602535000   | 0.339068000  | 1.223786000  |
| C | -8.214388000  | -0.267466000 | -1.157888000 |
| C | 8.205612000   | 0.312058000  | 1.191078000  |
| C | -7.292291000  | -0.426611000 | -2.299495000 |
| C | 7.283793000   | 0.471209000  | 2.332908000  |
| C | -7.725502000  | -0.633450000 | -3.611825000 |
| C | 7.717331000   | 0.678021000  | 3.645134000  |
| H | -8.786300000  | -0.685625000 | -3.827611000 |
| C | -6.795090000  | -0.772412000 | -4.637256000 |
| C | 6.787175000   | 0.816973000  | 4.670798000  |
| C | -5.437090000  | -0.699507000 | -4.325849000 |
| C | 5.429097000   | 0.744082000  | 4.359724000  |
| H | 4.665950000   | 0.845780000  | 5.123550000  |
| C | -5.061090000  | -0.491993000 | -3.003403000 |
| C | 5.052768000   | 0.536599000  | 3.037365000  |
| H | 4.010236000   | 0.472279000  | 2.749399000  |
| C | -5.975305000  | -3.093795000 | 0.332035000  |
| C | 5.966249000   | 3.138431000  | -0.298206000 |
| H | -7.018045000  | -2.796527000 | 0.344451000  |
| H | 7.008984000   | 2.841154000  | -0.310759000 |
| C | -5.633001000  | -4.431762000 | 0.336128000  |
| C | 5.623960000   | 4.476403000  | -0.302227000 |
| H | -6.392752000  | -5.204178000 | 0.363342000  |
| H | 6.383717000   | 5.248810000  | -0.329520000 |
| C | -4.271432000  | -4.770695000 | 0.269172000  |
| C | 4.262403000   | 4.815355000  | -0.235106000 |
| C | -3.326093000  | -3.741026000 | 0.240560000  |
| C | 3.317055000   | 3.785696000  | -0.206393000 |
| H | -2.277921000  | -3.971350000 | 0.135886000  |
| H | 2.268896000   | 4.016025000  | -0.101593000 |
| C | -3.732056000  | -2.397699000 | 0.298179000  |
| C | 3.723000000   | 2.442367000  | -0.264075000 |
| C | -2.843792000  | -1.223874000 | 0.255006000  |

|   |              |              |              |
|---|--------------|--------------|--------------|
| C | 2.834720000  | 1.268562000  | -0.220790000 |
| C | -3.554356000 | -0.022727000 | 0.037562000  |
| C | 3.545280000  | 0.067407000  | -0.003379000 |
| C | -2.876264000 | 1.195129000  | -0.187957000 |
| C | 2.867182000  | -1.150434000 | 0.222199000  |
| C | -3.792026000 | 2.347869000  | -0.230321000 |
| C | 3.782924000  | -2.303190000 | 0.264505000  |
| C | -3.431696000 | 3.695620000  | -0.171725000 |
| C | 3.422564000  | -3.650940000 | 0.206054000  |
| H | -2.396926000 | 3.991541000  | -0.074636000 |
| H | 2.387776000  | -3.946852000 | 0.109131000  |
| C | -4.402385000 | 4.706359000  | -0.193126000 |
| C | 4.393238000  | -4.661693000 | 0.227403000  |
| C | -5.753111000 | 4.338199000  | -0.259785000 |
| C | 5.743978000  | -4.293552000 | 0.293859000  |
| H | -6.557868000 | 5.060744000  | -0.285278000 |
| H | 6.548726000  | -5.016109000 | 0.319301000  |
| C | -6.053146000 | 2.982445000  | -0.261457000 |
| C | 6.044037000  | -2.937804000 | 0.295390000  |
| H | -7.088722000 | 2.660602000  | -0.275433000 |
| H | 7.079621000  | -2.615979000 | 0.309204000  |
| C | -1.462667000 | 1.193898000  | -0.347210000 |
| C | 1.453590000  | -1.149181000 | 0.381509000  |
| C | -0.724526000 | 0.012696000  | 0.021401000  |
| C | 0.715449000  | 0.032023000  | 0.012906000  |
| C | -1.427857000 | -1.186761000 | 0.399286000  |
| C | 1.418780000  | 1.231474000  | -0.364994000 |
| C | -0.651502000 | -2.247380000 | 0.966267000  |
| C | 0.642426000  | 2.292113000  | -0.931939000 |
| H | -1.154566000 | -3.062329000 | 1.472331000  |
| H | 1.145492000  | 3.107080000  | -1.437971000 |
| C | 0.712958000  | -2.230319000 | 0.956409000  |
| C | -0.722034000 | 2.275055000  | -0.922075000 |
| H | 1.245190000  | -3.033455000 | 1.451271000  |
| H | -1.254265000 | 3.078206000  | -1.416913000 |
| O | -3.980564000 | -6.085824000 | 0.229460000  |
| O | 3.935788000  | -5.928160000 | 0.172389000  |
| O | 3.971556000  | 6.130487000  | -0.195342000 |
| O | -3.944961000 | 5.972828000  | -0.137951000 |
| C | -4.890123000 | 7.059192000  | -0.136005000 |
| C | -4.130494000 | 8.391266000  | -0.058102000 |
| C | -5.187121000 | 9.513341000  | -0.053575000 |
| C | -3.211532000 | 8.548524000  | -1.284403000 |
| C | -3.301709000 | 8.454096000  | 1.238852000  |
| C | 2.597564000  | 6.551314000  | -0.117127000 |
| C | 2.537644000  | 8.085640000  | -0.143386000 |
| C | 1.052112000  | 8.481778000  | -0.035614000 |
| C | 3.318507000  | 8.667815000  | 1.050004000  |
| C | 3.121945000  | 8.612901000  | -1.467683000 |
| C | -2.606564000 | -6.506635000 | 0.151322000  |
| C | -2.546632000 | -8.040961000 | 0.177539000  |

|   |              |               |              |
|---|--------------|---------------|--------------|
| C | -3.131013000 | -8.568265000  | 1.501783000  |
| C | -3.327413000 | -8.623108000  | -1.015918000 |
| C | -1.061090000 | -8.437084000  | 0.069852000  |
| C | 4.880937000  | -7.014536000  | 0.170435000  |
| C | 4.121285000  | -8.346612000  | 0.092777000  |
| C | 3.292349000  | -8.409589000  | -1.204073000 |
| C | 3.202467000  | -8.503718000  | 1.319206000  |
| C | 5.177903000  | -9.468696000  | 0.088260000  |
| H | -5.560667000 | 6.947851000   | 0.725914000  |
| H | -5.489408000 | 7.013553000   | -1.054554000 |
| H | -5.858637000 | 9.427104000   | 0.809277000  |
| H | -5.798061000 | 9.492374000   | -0.964181000 |
| H | -4.698240000 | 10.492609000  | -0.000929000 |
| H | -3.788520000 | 8.515785000   | -2.217022000 |
| H | -2.459490000 | 7.753569000   | -1.322737000 |
| H | -2.687272000 | 9.510472000   | -1.247467000 |
| H | -3.944215000 | 8.358347000   | 2.123001000  |
| H | -2.775182000 | 9.412952000   | 1.308759000  |
| H | -2.555454000 | 7.653720000   | 1.273526000  |
| H | 2.045085000  | 6.132583000   | -0.968282000 |
| H | 2.157359000  | 6.164355000   | 0.811222000  |
| H | 0.949211000  | 9.572618000   | -0.056065000 |
| H | 0.607524000  | 8.121137000   | 0.900074000  |
| H | 0.466473000  | 8.075263000   | -0.869267000 |
| H | 2.909004000  | 8.309660000   | 2.002664000  |
| H | 3.257158000  | 9.762259000   | 1.047998000  |
| H | 4.375620000  | 8.386650000   | 1.007546000  |
| H | 2.566584000  | 8.219935000   | -2.328472000 |
| H | 4.171889000  | 8.324021000   | -1.580442000 |
| H | 3.064793000  | 9.706939000   | -1.501948000 |
| H | -2.054144000 | -6.087924000  | 1.002525000  |
| H | -2.166302000 | -6.119643000  | -0.776987000 |
| H | -2.575708000 | -8.175324000  | 2.362619000  |
| H | -3.073859000 | -9.662304000  | 1.536017000  |
| H | -4.180966000 | -8.279393000  | 1.614486000  |
| H | -4.384532000 | -8.341955000  | -0.973516000 |
| H | -3.266052000 | -9.717551000  | -1.013942000 |
| H | -2.917855000 | -8.264919000  | -1.968541000 |
| H | -0.475505000 | -8.030585000  | 0.903551000  |
| H | -0.616444000 | -8.076418000  | -0.865799000 |
| H | -0.958180000 | -9.527924000  | 0.090283000  |
| H | 5.480343000  | -6.968804000  | 1.088900000  |
| H | 5.551369000  | -6.903294000  | -0.691584000 |
| H | 2.765804000  | -9.368446000  | -1.273803000 |
| H | 3.934755000  | -8.313954000  | -2.088307000 |
| H | 2.546100000  | -7.609208000  | -1.238759000 |
| H | 2.450434000  | -7.708754000  | 1.357534000  |
| H | 3.779565000  | -8.470871000  | 2.251752000  |
| H | 2.678197000  | -9.465668000  | 1.282447000  |
| H | 5.849315000  | -9.382568000  | -0.774684000 |
| H | 4.689008000  | -10.447967000 | 0.035790000  |

|   |               |              |              |
|---|---------------|--------------|--------------|
| H | 5.788952000   | -9.447624000 | 0.998789000  |
| H | -4.752717000  | 0.726597000  | 5.158154000  |
| H | -7.212835000  | 0.782198000  | 5.701619000  |
| H | -4.062024000  | 0.377429000  | 2.790183000  |
| H | -10.146584000 | -0.444723000 | -2.121348000 |
| H | -11.399848000 | -0.140662000 | -0.002855000 |
| H | -7.125350000  | -0.933645000 | -5.658147000 |
| H | -4.673753000  | -0.801216000 | -5.089482000 |
| H | -4.018631000  | -0.427660000 | -2.715172000 |
| H | 7.202365000   | -0.737832000 | -5.668145000 |
| H | 8.836772000   | -0.443117000 | -3.820898000 |
| H | 11.390786000  | 0.185269000  | 0.035259000  |
| H | 10.138043000  | 0.489352000  | 2.154060000  |
| H | 8.778183000   | 0.730177000  | 3.860657000  |
| H | 7.117688000   | 0.978185000  | 5.691611000  |

Cartesian coordinates of DFT-optimized structure of **8b** complex by B3LYP/Def2-TZVP; 6-31G(d,p)/CH<sub>3</sub>CN, charge = 2, multiplicity = 1

|    |              |              |              |
|----|--------------|--------------|--------------|
| Ru | 4.983738000  | -0.359031000 | -0.208774000 |
| N  | 5.472466000  | 0.158341000  | 1.766846000  |
| N  | 7.020202000  | -0.457726000 | -0.237979000 |
| N  | 5.363386000  | -0.918401000 | -2.196774000 |
| C  | 4.620147000  | 0.466566000  | 2.763512000  |
| H  | 3.567970000  | 0.437026000  | 2.506207000  |
| C  | 5.043437000  | 0.802280000  | 4.045244000  |
| H  | 4.308709000  | 1.041683000  | 4.806079000  |
| C  | 6.410614000  | 0.822101000  | 4.318944000  |
| H  | 6.777866000  | 1.079491000  | 5.306923000  |
| C  | 7.303179000  | 0.503985000  | 3.299130000  |
| H  | 8.370357000  | 0.511346000  | 3.487834000  |
| C  | 6.822439000  | 0.174556000  | 2.029548000  |
| C  | 7.702596000  | -0.175534000 | 0.895806000  |
| C  | 9.098815000  | -0.236320000 | 0.900933000  |
| H  | 9.666163000  | -0.015056000 | 1.797302000  |
| C  | 9.759475000  | -0.590750000 | -0.277218000 |
| C  | 9.034203000  | -0.877903000 | -1.435505000 |
| H  | 9.551591000  | -1.151881000 | -2.347405000 |
| C  | 7.639369000  | -0.803164000 | -1.390397000 |
| C  | 6.697391000  | -1.064851000 | -2.498005000 |
| C  | 7.107447000  | -1.437512000 | -3.780368000 |
| H  | 8.163065000  | -1.547863000 | -3.999524000 |
| C  | 6.159474000  | -1.666313000 | -4.773785000 |
| H  | 6.471656000  | -1.956678000 | -5.771510000 |
| C  | 4.809032000  | -1.514595000 | -4.461097000 |
| H  | 4.033103000  | -1.680695000 | -5.200255000 |
| C  | 4.457076000  | -1.141263000 | -3.168255000 |
| H  | 3.420496000  | -1.010328000 | -2.881004000 |
| C  | -3.323694000 | 1.204830000  | -0.408935000 |
| C  | 2.249032000  | -1.388353000 | 0.153318000  |

|    |               |              |              |
|----|---------------|--------------|--------------|
| C  | -4.078685000  | 0.079949000  | -0.075265000 |
| C  | 3.003951000   | -0.263327000 | -0.180097000 |
| C  | -3.426548000  | -1.113283000 | 0.237273000  |
| C  | 2.351719000   | 0.929773000  | -0.492844000 |
| C  | -2.020281000  | -1.192969000 | 0.343298000  |
| C  | 0.945467000   | 1.009250000  | -0.599307000 |
| C  | -1.255332000  | -0.057095000 | -0.117445000 |
| C  | 0.180565000   | -0.126691000 | -0.138669000 |
| C  | -1.920089000  | 1.148142000  | -0.556950000 |
| C  | 0.845382000   | -1.331870000 | 0.300897000  |
| C  | -1.124975000  | 2.171558000  | -1.163105000 |
| C  | 0.050216000   | -2.355379000 | 0.906852000  |
| H  | -1.607708000  | 2.991072000  | -1.679672000 |
| H  | 0.532897000   | -3.175031000 | 1.423251000  |
| C  | 0.235518000   | 2.105633000  | -1.183188000 |
| C  | -1.310272000  | -2.289446000 | 0.926963000  |
| H  | 0.779831000   | 2.875394000  | -1.714865000 |
| H  | -1.854506000  | -3.059347000 | 1.458506000  |
| H  | 10.842855000  | -0.643354000 | -0.292726000 |
| N  | -4.357252000  | -2.175108000 | 0.456919000  |
| N  | -5.696063000  | -1.823468000 | 0.452385000  |
| C  | -6.383992000  | -2.959232000 | 0.591627000  |
| C  | -5.515040000  | -4.060994000 | 0.667710000  |
| C  | -4.243386000  | -3.530411000 | 0.565746000  |
| H  | -7.463896000  | -2.929926000 | 0.617505000  |
| H  | -5.776518000  | -5.103042000 | 0.773564000  |
| H  | -3.287905000  | -4.023973000 | 0.530568000  |
| Ru | -6.058426000  | 0.176120000  | -0.045124000 |
| C  | -5.879763000  | 1.332519000  | 4.206890000  |
| C  | -5.529000000  | 0.959024000  | 2.913766000  |
| N  | -6.436224000  | 0.735738000  | 1.943251000  |
| C  | -7.769952000  | 0.881927000  | 2.245758000  |
| C  | -8.178838000  | 1.254745000  | 3.528448000  |
| C  | -7.229935000  | 1.483959000  | 4.520883000  |
| C  | -8.712973000  | 0.619791000  | 1.139141000  |
| N  | -8.094866000  | 0.274590000  | -0.013910000 |
| C  | -8.778332000  | -0.008108000 | -1.146928000 |
| C  | -10.174592000 | 0.051940000  | -1.150551000 |
| C  | -10.834161000 | 0.406203000  | 0.028258000  |
| C  | -10.107789000 | 0.693850000  | 1.185736000  |
| C  | -7.899212000  | -0.357950000 | -2.281549000 |
| N  | -6.548968000  | -0.341324000 | -2.020177000 |
| C  | -5.697553000  | -0.649232000 | -3.017727000 |
| C  | -6.122017000  | -0.985038000 | -4.299042000 |
| C  | -7.489460000  | -1.005302000 | -4.571378000 |
| C  | -8.381104000  | -0.687502000 | -3.550661000 |
| H  | -4.492672000  | 0.828320000  | 2.625500000  |
| H  | -5.103149000  | 1.498938000  | 4.945256000  |
| H  | -7.541200000  | 1.774441000  | 5.518861000  |
| H  | -9.234264000  | 1.364936000  | 3.748603000  |
| H  | -10.624334000 | 0.967649000  | 2.098170000  |

|   |               |              |              |
|---|---------------|--------------|--------------|
| H | -11.917551000 | 0.458251000  | 0.044932000  |
| H | -10.742794000 | -0.169816000 | -2.046256000 |
| H | -9.448466000  | -0.695164000 | -3.738320000 |
| H | -7.857615000  | -1.262765000 | -5.559000000 |
| H | -5.387966000  | -1.224171000 | -5.060615000 |
| H | -4.645129000  | -0.619349000 | -2.761474000 |
| N | -4.153337000  | 2.352167000  | -0.602028000 |
| N | -5.519174000  | 2.131912000  | -0.556364000 |
| C | -6.097712000  | 3.329175000  | -0.676609000 |
| C | -5.128805000  | 4.341642000  | -0.780771000 |
| C | -3.912040000  | 3.690194000  | -0.716505000 |
| H | -2.912618000  | 4.088823000  | -0.711100000 |
| H | -5.291154000  | 5.404261000  | -0.880384000 |
| H | -7.175662000  | 3.404680000  | -0.669742000 |
| N | 3.078826000   | -2.535501000 | 0.346819000  |
| C | 2.837736000   | -3.873559000 | 0.461327000  |
| C | 4.054601000   | -4.524745000 | 0.526434000  |
| C | 5.023364000   | -3.512085000 | 0.422749000  |
| N | 4.444639000   | -2.314962000 | 0.302020000  |
| N | 3.282291000   | 1.991810000  | -0.712004000 |
| N | 4.621189000   | 1.640462000  | -0.706547000 |
| C | 5.308970000   | 2.776401000  | -0.845174000 |
| C | 4.439827000   | 3.877974000  | -0.921719000 |
| C | 3.168210000   | 3.347094000  | -0.820730000 |
| H | 1.838399000   | -4.272393000 | 0.455289000  |
| H | 4.217120000   | -5.587319000 | 0.626245000  |
| H | 6.101334000   | -3.587367000 | 0.416512000  |
| H | 2.212583000   | 3.840424000  | -0.786216000 |
| H | 4.701128000   | 4.920096000  | -1.027278000 |
| H | 6.388897000   | 2.747327000  | -0.870373000 |

Cartesian coordinates of DFT-optimized structure of **9b** complex by B3LYP/Def2-TZVP;  
6-31G(d,p)/CH<sub>3</sub>CN, charge = 2, multiplicity = 1

|    |             |              |              |
|----|-------------|--------------|--------------|
| Ru | 4.987462000 | -0.190361000 | -0.000082000 |
| N  | 4.491808000 | -2.214312000 | 0.306807000  |
| N  | 5.460984000 | 0.129319000  | 2.016428000  |
| N  | 7.027722000 | -0.271676000 | -0.020971000 |
| N  | 5.392324000 | -0.540980000 | -2.026566000 |
| C  | 4.596303000 | 0.334121000  | 3.030588000  |
| H  | 3.547501000 | 0.327640000  | 2.758634000  |
| C  | 5.004064000 | 0.541589000  | 4.343531000  |
| H  | 4.259877000 | 0.701233000  | 5.116076000  |
| C  | 6.368640000 | 0.539543000  | 4.633948000  |
| H  | 6.723450000 | 0.698075000  | 5.646988000  |
| C  | 7.273543000 | 0.330105000  | 3.597716000  |
| H  | 8.338797000 | 0.325117000  | 3.797402000  |
| C  | 6.808812000 | 0.126288000  | 2.295649000  |
| C  | 7.701642000 | -0.103808000 | 1.142752000  |
| C  | 9.097911000 | -0.161170000 | 1.154142000  |

|   |              |              |              |
|---|--------------|--------------|--------------|
| H | 9.656510000  | -0.029965000 | 2.073576000  |
| C | 9.771045000  | -0.392868000 | -0.047661000 |
| C | 9.056959000  | -0.563035000 | -1.235985000 |
| H | 9.583485000  | -0.742788000 | -2.166119000 |
| C | 7.661511000  | -0.496864000 | -1.197380000 |
| C | 6.730081000  | -0.647697000 | -2.332472000 |
| C | 7.151034000  | -0.882133000 | -3.644248000 |
| H | 8.209085000  | -0.962527000 | -3.864943000 |
| C | 6.212007000  | -1.011600000 | -4.663041000 |
| H | 6.532740000  | -1.193562000 | -5.683479000 |
| C | 4.857808000  | -0.902753000 | -4.345527000 |
| H | 4.088092000  | -0.996793000 | -5.103714000 |
| C | 4.494168000  | -0.668846000 | -3.024098000 |
| H | 3.455120000  | -0.576926000 | -2.731081000 |
| C | 5.368494000  | -3.238946000 | 0.350406000  |
| H | 6.417238000  | -2.963484000 | 0.360869000  |
| C | 4.997169000  | -4.568825000 | 0.370207000  |
| H | 5.739673000  | -5.357471000 | 0.405580000  |
| C | 3.628343000  | -4.878600000 | 0.307336000  |
| C | 2.704810000  | -3.829431000 | 0.272371000  |
| H | 1.651001000  | -4.037480000 | 0.175874000  |
| C | 3.140846000  | -2.494790000 | 0.311690000  |
| C | -3.333162000 | 1.258252000  | -0.310181000 |
| C | 2.279573000  | -1.302007000 | 0.255217000  |
| C | -4.076841000 | 0.121292000  | 0.008369000  |
| C | 3.014690000  | -0.120485000 | 0.013116000  |
| C | -3.412251000 | -1.061959000 | 0.332249000  |
| C | 2.362356000  | 1.108410000  | -0.227297000 |
| C | -2.005502000 | -1.122584000 | 0.455211000  |
| C | 0.949116000  | 1.135033000  | -0.383105000 |
| C | -1.250874000 | 0.026682000  | 0.015308000  |
| C | 0.187086000  | -0.022872000 | 0.015675000  |
| C | -1.924897000 | 1.224700000  | -0.425767000 |
| C | 0.867630000  | -1.229927000 | 0.415045000  |
| C | -1.129524000 | 2.264074000  | -1.002449000 |
| C | 0.078530000  | -2.261404000 | 1.016992000  |
| H | -1.610505000 | 3.079372000  | -1.527478000 |
| H | 0.573290000  | -3.078515000 | 1.527278000  |
| C | 0.233098000  | 2.221929000  | -0.978826000 |
| C | -1.284005000 | -2.210809000 | 1.038436000  |
| H | 0.783804000  | 3.007611000  | -1.480801000 |
| H | -1.819964000 | -2.987740000 | 1.568463000  |
| O | 3.309921000  | -6.187556000 | 0.277437000  |
| C | 1.927693000  | -6.579843000 | 0.199623000  |
| C | 1.838339000  | -8.113015000 | 0.200887000  |
| C | 0.344444000  | -8.479605000 | 0.106203000  |
| C | 2.592307000  | -8.688708000 | -1.012881000 |
| C | 2.429437000  | -8.674923000 | 1.507795000  |
| H | 1.387578000  | -6.163080000 | 1.059891000  |
| H | 1.490317000  | -6.170348000 | -0.720322000 |
| H | 0.222257000  | -9.568560000 | 0.107763000  |

|    |               |              |              |
|----|---------------|--------------|--------------|
| H  | -0.105353000  | -8.093459000 | -0.816631000 |
| H  | -0.221798000  | -8.077713000 | 0.955273000  |
| H  | 2.182011000   | -8.300660000 | -1.953491000 |
| H  | 2.503837000   | -9.781127000 | -1.033184000 |
| H  | 3.656520000   | -8.434879000 | -0.976291000 |
| H  | 1.893384000   | -8.286033000 | 2.382552000  |
| H  | 3.486409000   | -8.409411000 | 1.611207000  |
| H  | 2.349884000   | -9.768044000 | 1.523715000  |
| H  | 10.854688000  | -0.440919000 | -0.058163000 |
| N  | -4.330414000  | -2.137123000 | 0.537321000  |
| N  | -5.674547000  | -1.805990000 | 0.506267000  |
| C  | -6.347597000  | -2.951161000 | 0.638565000  |
| C  | -5.463712000  | -4.039313000 | 0.737134000  |
| C  | -4.198606000  | -3.490270000 | 0.656775000  |
| H  | -7.428067000  | -2.937983000 | 0.643431000  |
| H  | -5.711570000  | -5.084627000 | 0.843481000  |
| H  | -3.235808000  | -3.970227000 | 0.643496000  |
| Ru | -6.058629000  | 0.184705000  | -0.004320000 |
| C  | -5.992571000  | 1.362736000  | 4.244268000  |
| C  | -5.607254000  | 0.988250000  | 2.961282000  |
| N  | -6.489015000  | 0.744443000  | 1.972311000  |
| C  | -7.831319000  | 0.871664000  | 2.244330000  |
| C  | -8.274410000  | 1.245515000  | 3.515227000  |
| C  | -7.351638000  | 1.494351000  | 4.527368000  |
| C  | -8.745504000  | 0.588796000  | 1.118967000  |
| N  | -8.096687000  | 0.248633000  | -0.018628000 |
| C  | -8.750216000  | -0.051007000 | -1.164773000 |
| C  | -10.146866000 | -0.014682000 | -1.199361000 |
| C  | -10.837916000 | 0.334006000  | -0.036969000 |
| C  | -10.142037000 | 0.639571000  | 1.134689000  |
| C  | -7.840297000  | -0.389989000 | -2.277852000 |
| N  | -6.496595000  | -0.347307000 | -1.987282000 |
| C  | -5.618509000  | -0.643619000 | -2.965183000 |
| C  | -6.009037000  | -0.991386000 | -4.254084000 |
| C  | -7.369689000  | -1.037900000 | -4.555713000 |
| C  | -8.288708000  | -0.733513000 | -3.555430000 |
| H  | -4.562763000  | 0.875127000  | 2.695942000  |
| H  | -5.235235000  | 1.545876000  | 4.998534000  |
| H  | -7.689669000  | 1.785088000  | 5.516559000  |
| H  | -9.336051000  | 1.341172000  | 3.710746000  |
| H  | -10.683137000 | 0.908715000  | 2.034200000  |
| H  | -11.922142000 | 0.367605000  | -0.044133000 |
| H  | -10.691610000 | -0.250451000 | -2.106048000 |
| H  | -9.351515000  | -0.762322000 | -3.765155000 |
| H  | -7.711704000  | -1.305360000 | -5.550088000 |
| H  | -5.254422000  | -1.219604000 | -4.998720000 |
| H  | -4.572597000  | -0.595263000 | -2.686179000 |
| N  | -4.177585000  | 2.391167000  | -0.522341000 |
| N  | -5.540761000  | 2.147712000  | -0.507376000 |
| C  | -6.136395000  | 3.334504000  | -0.644433000 |
| C  | -5.182622000  | 4.363200000  | -0.729940000 |

|   |              |              |              |
|---|--------------|--------------|--------------|
| C | -3.956802000 | 3.733118000  | -0.636562000 |
| C | 3.302552000  | 2.240248000  | -0.289365000 |
| N | 4.637910000  | 1.866737000  | -0.295253000 |
| C | 5.576981000  | 2.825585000  | -0.339291000 |
| C | 5.306174000  | 4.187690000  | -0.351908000 |
| C | 3.963961000  | 4.584801000  | -0.280542000 |
| C | 2.971785000  | 3.595739000  | -0.244099000 |
| O | 3.533074000  | 5.860722000  | -0.233962000 |
| C | 4.497557000  | 6.929554000  | -0.246837000 |
| C | 3.760925000  | 8.274134000  | -0.159423000 |
| C | 4.834876000  | 9.379512000  | -0.176186000 |
| C | 2.955673000  | 8.352097000  | 1.151526000  |
| C | 2.822556000  | 8.443215000  | -1.369269000 |
| H | 5.083106000  | 6.872153000  | -1.173658000 |
| H | 5.178265000  | 6.807927000  | 0.605723000  |
| H | 5.430044000  | 9.346425000  | -1.096964000 |
| H | 5.520073000  | 9.286501000  | 0.675300000  |
| H | 4.362317000  | 10.366584000 | -0.118729000 |
| H | 3.610675000  | 8.240969000  | 2.024610000  |
| H | 2.193903000  | 7.567198000  | 1.196688000  |
| H | 2.450590000  | 9.321592000  | 1.231726000  |
| H | 3.382131000  | 8.401955000  | -2.312005000 |
| H | 2.312093000  | 9.412180000  | -1.323655000 |
| H | 2.059923000  | 7.658207000  | -1.392418000 |
| H | 6.125433000  | 4.893378000  | -0.391353000 |
| H | 6.604776000  | 2.479496000  | -0.354507000 |
| H | 1.944237000  | 3.915640000  | -0.144818000 |
| H | -2.964972000 | 4.149442000  | -0.610584000 |
| H | -5.360939000 | 5.422619000  | -0.836128000 |
| H | -7.215346000 | 3.391944000  | -0.662754000 |

Cartesian coordinates of DFT-optimized structure of **10b** complex by B3LYP/Def2-TZVP;  
6-31G(d,p)/CH<sub>3</sub>CN, charge = 2, multiplicity = 1

|    |             |              |              |
|----|-------------|--------------|--------------|
| Ru | 5.459480000 | 0.853480000  | -0.017192000 |
| N  | 5.361377000 | -1.225610000 | 0.301772000  |
| N  | 5.794623000 | 1.281547000  | 2.009187000  |
| N  | 7.467708000 | 1.211454000  | 0.014018000  |
| N  | 5.985538000 | 0.567521000  | -2.027467000 |
| C  | 4.882827000 | 1.290275000  | 3.001659000  |
| H  | 3.869182000 | 1.045284000  | 2.707465000  |
| C  | 5.202645000 | 1.590174000  | 4.321421000  |
| H  | 4.423723000 | 1.581890000  | 5.075940000  |
| C  | 6.525334000 | 1.896040000  | 4.641268000  |
| H  | 6.811811000 | 2.135375000  | 5.660070000  |
| C  | 7.478765000 | 1.887877000  | 3.627349000  |
| H  | 8.513584000 | 2.119611000  | 3.850866000  |
| C  | 7.102199000 | 1.578908000  | 2.317977000  |
| C  | 8.053187000 | 1.544753000  | 1.188675000  |
| C  | 9.424317000 | 1.812033000  | 1.231992000  |

|   |              |              |              |
|---|--------------|--------------|--------------|
| H | 9.913756000  | 2.080425000  | 2.160986000  |
| C | 10.162733000 | 1.727853000  | 0.049471000  |
| C | 9.537768000  | 1.383609000  | -1.151233000 |
| H | 10.114889000 | 1.321271000  | -2.066436000 |
| C | 8.164341000  | 1.125884000  | -1.144032000 |
| C | 7.321374000  | 0.754930000  | -2.298372000 |
| C | 7.820357000  | 0.599091000  | -3.594108000 |
| H | 8.875527000  | 0.752269000  | -3.788198000 |
| C | 6.961651000  | 0.247370000  | -4.631614000 |
| H | 7.342981000  | 0.124769000  | -5.639982000 |
| C | 5.609010000  | 0.057377000  | -4.348836000 |
| H | 4.900684000  | -0.217500000 | -5.122650000 |
| C | 5.165965000  | 0.226743000  | -3.041614000 |
| H | 4.124256000  | 0.091117000  | -2.775940000 |
| C | 6.423139000  | -2.055664000 | 0.365493000  |
| H | 7.395406000  | -1.576600000 | 0.397928000  |
| C | 6.323694000  | -3.433064000 | 0.378158000  |
| H | 7.207764000  | -4.057819000 | 0.429135000  |
| C | 5.046039000  | -4.009272000 | 0.287246000  |
| C | 3.932765000  | -3.164138000 | 0.235034000  |
| H | 2.944395000  | -3.578593000 | 0.116939000  |
| C | 4.092412000  | -1.770400000 | 0.280736000  |
| C | -3.008643000 | 0.773636000  | -0.208367000 |
| C | 3.008788000  | -0.772283000 | 0.207332000  |
| C | -3.509820000 | -0.520812000 | 0.032232000  |
| C | 3.509985000  | 0.522135000  | -0.033338000 |
| C | -2.630872000 | -1.582694000 | 0.270377000  |
| C | 2.631050000  | 1.584017000  | -0.271505000 |
| C | -1.239787000 | -1.387993000 | 0.400884000  |
| C | 1.239953000  | 1.389337000  | -0.401960000 |
| C | -0.712142000 | -0.100631000 | 0.011120000  |
| C | 0.712298000  | 0.101993000  | -0.012152000 |
| C | -1.604864000 | 0.970066000  | -0.353781000 |
| C | 1.605015000  | -0.968707000 | 0.352743000  |
| C | -1.019643000 | 2.147266000  | -0.920732000 |
| C | 1.019809000  | -2.145938000 | 0.919636000  |
| H | -1.657259000 | 2.876091000  | -1.404771000 |
| H | 1.657445000  | -2.874800000 | 1.403602000  |
| C | 0.328366000  | 2.351077000  | -0.939648000 |
| C | -0.328198000 | -2.349759000 | 0.938528000  |
| H | 0.711244000  | 3.233606000  | -1.436598000 |
| H | -0.711073000 | -3.232328000 | 1.435409000  |
| O | 4.994180000  | -5.354533000 | 0.248552000  |
| C | 3.718136000  | -6.013899000 | 0.152661000  |
| C | 3.936893000  | -7.533639000 | 0.129106000  |
| C | 2.545454000  | -8.188811000 | 0.027411000  |
| C | 4.787252000  | -7.926371000 | -1.093912000 |
| C | 4.631301000  | -7.988146000 | 1.426829000  |
| H | 3.101776000  | -5.727249000 | 1.014923000  |
| H | 3.212825000  | -5.685402000 | -0.764793000 |
| H | 2.642282000  | -9.280137000 | 0.006100000  |

|    |              |              |              |
|----|--------------|--------------|--------------|
| H  | 2.022679000  | -7.880847000 | -0.886405000 |
| H  | 1.914953000  | -7.925492000 | 0.885473000  |
| H  | 4.301846000  | -7.617836000 | -2.028229000 |
| H  | 4.924648000  | -9.013248000 | -1.129827000 |
| H  | 5.776774000  | -7.459761000 | -1.055096000 |
| H  | 4.032264000  | -7.725309000 | 2.307540000  |
| H  | 5.616123000  | -7.522344000 | 1.534465000  |
| H  | 4.768105000  | -9.075715000 | 1.425933000  |
| H  | 11.228064000 | 1.931839000  | 0.063465000  |
| N  | 3.317077000  | 2.831183000  | -0.388459000 |
| C  | 2.919066000  | 4.136436000  | -0.405069000 |
| C  | 4.051082000  | 4.928893000  | -0.428160000 |
| C  | 5.132579000  | 4.031924000  | -0.402430000 |
| N  | 4.697622000  | 2.769820000  | -0.366378000 |
| N  | -3.316871000 | -2.829887000 | 0.387219000  |
| N  | -4.697418000 | -2.768560000 | 0.365064000  |
| C  | -5.132341000 | -4.030675000 | 0.401045000  |
| C  | -4.050824000 | -4.927617000 | 0.426824000  |
| C  | -2.918825000 | -4.135130000 | 0.403785000  |
| C  | -4.092314000 | 1.771730000  | -0.281708000 |
| C  | -3.932754000 | 3.165473000  | -0.235808000 |
| C  | -5.046065000 | 4.010556000  | -0.287983000 |
| C  | -6.323686000 | 3.434300000  | -0.379043000 |
| C  | -6.423062000 | 2.056898000  | -0.366533000 |
| N  | -5.361260000 | 1.226888000  | -0.302844000 |
| O  | -4.994272000 | 5.355813000  | -0.249105000 |
| C  | -3.718259000 | 6.015212000  | -0.153058000 |
| C  | -3.937072000 | 7.534941000  | -0.129314000 |
| C  | -2.545661000 | 8.190150000  | -0.027461000 |
| C  | -4.631429000 | 7.989592000  | -1.427014000 |
| C  | -4.787508000 | 7.927480000  | 1.093712000  |
| H  | -6.194376000 | -4.230394000 | 0.394465000  |
| H  | -4.087133000 | -6.006349000 | 0.450066000  |
| H  | -1.879529000 | -4.411370000 | 0.365480000  |
| H  | -2.944422000 | 3.579969000  | -0.117566000 |
| H  | -7.207784000 | 4.059017000  | -0.429990000 |
| H  | -7.395302000 | 1.577784000  | -0.399061000 |
| H  | -3.101842000 | 5.728699000  | -1.015325000 |
| H  | -3.212984000 | 5.686612000  | 0.764379000  |
| H  | -2.022921000 | 7.882080000  | 0.886339000  |
| H  | -2.642530000 | 9.281469000  | -0.006006000 |
| H  | -1.915108000 | 7.926971000  | -0.885527000 |
| H  | -4.032339000 | 7.726892000  | -2.307728000 |
| H  | -4.768273000 | 9.077157000  | -1.425983000 |
| H  | -5.616230000 | 7.523769000  | -1.534760000 |
| H  | -4.302142000 | 7.618835000  | 2.028012000  |
| H  | -5.777013000 | 7.460845000  | 1.054780000  |
| H  | -4.924940000 | 9.014348000  | 1.129767000  |
| Ru | -5.459303000 | -0.852223000 | 0.015963000  |
| C  | -5.609081000 | -0.056378000 | 4.347640000  |
| C  | -5.165967000 | -0.225654000 | 3.040433000  |

|   |               |              |              |
|---|---------------|--------------|--------------|
| N | -5.985478000  | -0.566418000 | 2.026227000  |
| C | -7.321318000  | -0.753903000 | 2.297059000  |
| C | -7.820367000  | -0.598155000 | 3.592778000  |
| C | -6.961728000  | -0.246449000 | 4.630344000  |
| C | -8.164212000  | -1.124829000 | 1.142655000  |
| N | -7.467523000  | -1.210281000 | -0.015370000 |
| C | -8.052928000  | -1.543535000 | -1.190076000 |
| C | -9.424039000  | -1.810896000 | -1.233471000 |
| C | -10.162514000 | -1.726840000 | -0.050979000 |
| C | -9.537622000  | -1.382639000 | 1.149776000  |
| C | -7.101888000  | -1.577557000 | -2.319339000 |
| N | -5.794339000  | -1.280161000 | -2.010466000 |
| C | -4.882495000  | -1.288766000 | -3.002897000 |
| C | -5.202239000  | -1.588568000 | -4.322696000 |
| C | -6.524901000  | -1.894467000 | -4.642631000 |
| C | -7.478376000  | -1.886432000 | -3.628753000 |
| H | -4.124251000  | -0.089968000 | 2.774811000  |
| H | -4.900806000  | 0.218491000  | 5.121501000  |
| H | -7.343112000  | -0.123920000 | 5.638699000  |
| H | -8.875540000  | -0.751391000 | 3.786805000  |
| H | -10.114788000 | -1.320399000 | 2.064958000  |
| H | -11.227831000 | -1.930893000 | -0.065034000 |
| H | -9.913417000  | -2.079257000 | -2.162506000 |
| H | -8.513176000  | -2.118193000 | -3.852333000 |
| H | -6.811321000  | -2.133729000 | -5.661465000 |
| H | -4.423283000  | -1.580185000 | -5.077178000 |
| H | -3.868875000  | -1.043752000 | -2.708632000 |
| H | 4.087413000   | 6.007624000  | -0.451415000 |
| H | 1.879778000   | 4.412704000  | -0.366744000 |
| H | 6.194620000   | 4.231609000  | -0.395911000 |

Cartesian coordinates of DFT-optimized structure of **11b** complex by B3LYP/Def2-TZVP;  
6-31G(d,p)/CH<sub>3</sub>CN, charge = 2, multiplicity = 1

|    |              |              |              |
|----|--------------|--------------|--------------|
| Ru | 5.629169000  | -0.949220000 | 0.031262000  |
| N  | 5.169759000  | 1.081668000  | -0.276262000 |
| N  | 6.069882000  | -1.291200000 | -1.991022000 |
| N  | 7.670384000  | -0.950575000 | 0.034131000  |
| N  | 6.063575000  | -0.592019000 | 2.052036000  |
| N  | -5.077527000 | 0.799973000  | -0.257374000 |
| C  | 5.189952000  | -1.449655000 | -2.999590000 |
| H  | 4.144424000  | -1.392628000 | -2.721008000 |
| C  | 5.578793000  | -1.673017000 | -4.315942000 |
| H  | 4.822873000  | -1.793488000 | -5.084154000 |
| C  | 6.939702000  | -1.737447000 | -4.614716000 |
| H  | 7.280131000  | -1.910061000 | -5.630372000 |
| C  | 7.860369000  | -1.575367000 | -3.583586000 |
| H  | 8.923290000  | -1.620347000 | -3.790485000 |
| C  | 7.414009000  | -1.352967000 | -2.278393000 |
| C  | 8.324971000  | -1.168268000 | -1.130944000 |

|   |              |              |              |
|---|--------------|--------------|--------------|
| C | 9.722047000  | -1.200478000 | -1.149362000 |
| H | 10.266258000 | -1.374989000 | -2.070145000 |
| C | 10.414130000 | -1.004170000 | 0.047725000  |
| C | 9.718387000  | -0.781221000 | 1.238083000  |
| H | 10.260073000 | -0.631498000 | 2.164700000  |
| C | 8.321420000  | -0.758627000 | 1.205823000  |
| C | 7.407004000  | -0.545482000 | 2.345752000  |
| C | 7.849511000  | -0.309711000 | 3.649828000  |
| H | 8.911856000  | -0.275186000 | 3.861567000  |
| C | 6.925770000  | -0.117512000 | 4.673096000  |
| H | 7.263316000  | 0.065877000  | 5.687827000  |
| C | 5.565728000  | -0.164146000 | 4.367389000  |
| H | 4.807591000  | -0.019017000 | 5.129126000  |
| C | 5.180655000  | -0.401938000 | 3.052384000  |
| H | 4.135765000  | -0.445093000 | 2.768791000  |
| C | 6.070974000  | 2.083808000  | -0.337357000 |
| H | 7.111865000  | 1.780998000  | -0.364499000 |
| C | 5.733090000  | 3.422674000  | -0.355066000 |
| H | 6.494651000  | 4.192023000  | -0.406164000 |
| C | 4.374079000  | 3.767216000  | -0.270714000 |
| C | 3.424899000  | 2.741627000  | -0.215331000 |
| H | 2.379251000  | 2.977553000  | -0.099511000 |
| C | 3.824710000  | 1.396592000  | -0.258580000 |
| C | -2.695852000 | -2.327771000 | 0.254468000  |
| C | 2.932340000  | 0.224840000  | -0.192250000 |
| C | -3.442790000 | -1.163355000 | 0.032614000  |
| C | 3.651643000  | -0.964420000 | 0.026547000  |
| C | -2.791066000 | 0.063779000  | -0.182936000 |
| C | 2.971452000  | -2.167986000 | 0.253704000  |
| C | -3.744220000 | 1.186888000  | -0.241461000 |
| C | -3.427918000 | 2.544881000  | -0.190643000 |
| H | -2.404681000 | 2.874909000  | -0.083634000 |
| C | -4.429131000 | 3.524967000  | -0.233195000 |
| C | -5.766590000 | 3.115241000  | -0.315804000 |
| H | -6.592313000 | 3.812964000  | -0.360803000 |
| C | -6.024659000 | 1.750484000  | -0.306920000 |
| H | -7.049097000 | 1.394977000  | -0.329702000 |
| C | -1.370665000 | 0.096377000  | -0.314786000 |
| C | 1.571803000  | -2.218600000 | 0.401647000  |
| C | -0.614746000 | -1.075268000 | 0.045385000  |
| C | 0.823303000  | -1.034413000 | 0.044083000  |
| C | -1.295265000 | -2.299854000 | 0.401898000  |
| C | 1.511339000  | 0.177343000  | -0.320337000 |
| C | -0.511056000 | -3.377780000 | 0.926875000  |
| C | 0.721052000  | 1.235592000  | -0.866859000 |
| H | -1.003825000 | -4.220849000 | 1.394614000  |
| H | 1.211633000  | 2.066566000  | -1.357990000 |
| C | 0.849859000  | -3.338944000 | 0.927314000  |
| C | -0.643966000 | 1.198317000  | -0.862255000 |
| H | 1.389648000  | -4.152691000 | 1.395144000  |
| H | -1.183827000 | 2.002382000  | -1.346448000 |

|   |              |              |              |
|---|--------------|--------------|--------------|
| O | 4.088870000  | 5.083342000  | -0.242501000 |
| O | -4.009571000 | 4.804002000  | -0.181800000 |
| C | -4.981830000 | 5.865716000  | -0.213578000 |
| C | -4.255976000 | 7.215965000  | -0.123416000 |
| C | -5.337270000 | 8.313558000  | -0.164419000 |
| C | -3.299435000 | 7.384348000  | -1.319062000 |
| C | -3.472168000 | 7.308206000  | 1.199583000  |
| C | 2.717076000  | 5.511823000  | -0.162637000 |
| C | 2.666459000  | 7.046356000  | -0.190476000 |
| C | 1.182540000  | 7.452083000  | -0.094766000 |
| C | 3.441198000  | 7.624169000  | 1.009076000  |
| C | 3.264168000  | 7.570336000  | -1.510019000 |
| H | -5.673268000 | 5.743653000  | 0.630192000  |
| H | -5.553864000 | 5.798512000  | -1.148084000 |
| H | -6.035429000 | 8.221090000  | 0.676523000  |
| H | -5.917310000 | 8.270352000  | -1.094369000 |
| H | -4.872580000 | 9.304263000  | -0.105767000 |
| H | -3.842681000 | 7.330909000  | -2.270685000 |
| H | -2.529182000 | 6.606293000  | -1.323457000 |
| H | -2.798719000 | 8.358308000  | -1.272240000 |
| H | -4.139702000 | 7.196900000  | 2.063089000  |
| H | -2.976391000 | 8.282318000  | 1.281789000  |
| H | -2.704641000 | 6.529981000  | 1.261504000  |
| H | 2.161556000  | 5.094103000  | -1.012418000 |
| H | 2.275712000  | 5.129632000  | 0.767007000  |
| H | 1.087551000  | 8.543592000  | -0.114975000 |
| H | 0.728374000  | 7.093557000  | 0.837049000  |
| H | 0.601217000  | 7.049745000  | -0.933534000 |
| H | 3.024915000  | 7.265181000  | 1.958522000  |
| H | 3.382486000  | 8.718768000  | 1.009060000  |
| H | 4.498009000  | 7.340986000  | 0.972814000  |
| H | 2.714197000  | 7.179245000  | -2.375076000 |
| H | 4.313797000  | 7.277361000  | -1.613827000 |
| H | 3.211082000  | 8.664614000  | -1.544848000 |
| H | 11.498663000 | -1.026024000 | 0.053227000  |
| N | 3.865443000  | -3.277512000 | 0.351599000  |
| C | 3.702117000  | -4.632156000 | 0.327560000  |
| C | 4.955044000  | -5.214795000 | 0.346097000  |
| C | 5.862761000  | -4.141931000 | 0.358819000  |
| N | 5.213969000  | -2.974821000 | 0.349461000  |
| N | -3.526328000 | -3.486007000 | 0.346880000  |
| C | -3.287261000 | -4.829386000 | 0.324646000  |
| C | -4.505641000 | -5.481190000 | 0.337407000  |
| C | -5.472180000 | -4.460941000 | 0.344827000  |
| N | -4.889746000 | -3.259242000 | 0.337724000  |
| H | 6.943317000  | -4.152881000 | 0.361254000  |
| H | 5.179679000  | -6.270745000 | 0.341579000  |
| H | 2.727679000  | -5.084554000 | 0.265439000  |
| H | -2.288806000 | -5.226875000 | 0.268546000  |
| H | -4.670751000 | -6.548068000 | 0.332597000  |
| H | -6.550361000 | -4.533511000 | 0.342866000  |

|    |               |              |              |
|----|---------------|--------------|--------------|
| Ru | -5.418906000  | -1.258946000 | 0.029334000  |
| C  | -5.292620000  | -1.927396000 | -4.325922000 |
| C  | -4.927047000  | -1.697121000 | -3.004088000 |
| N  | -5.821844000  | -1.604015000 | -2.000549000 |
| C  | -7.157881000  | -1.742033000 | -2.299099000 |
| C  | -7.581050000  | -1.974589000 | -3.610198000 |
| C  | -6.645134000  | -2.069395000 | -4.635970000 |
| C  | -8.086783000  | -1.625802000 | -1.157097000 |
| C  | -9.479105000  | -1.743275000 | -1.187370000 |
| C  | -10.190865000 | -1.603757000 | 0.006124000  |
| C  | -9.519078000  | -1.352047000 | 1.204503000  |
| C  | -8.126035000  | -1.242860000 | 1.183871000  |
| N  | -7.455546000  | -1.381457000 | 0.015584000  |
| C  | -7.234945000  | -0.986155000 | 2.333312000  |
| N  | -5.889126000  | -0.947461000 | 2.049767000  |
| C  | -5.026658000  | -0.713825000 | 3.058656000  |
| C  | -5.435022000  | -0.512586000 | 4.372717000  |
| C  | -6.797615000  | -0.551992000 | 4.668075000  |
| C  | -7.700533000  | -0.790337000 | 3.635950000  |
| H  | -4.525500000  | -1.993154000 | -5.089664000 |
| H  | -3.888942000  | -1.580439000 | -2.716534000 |
| H  | -8.637981000  | -2.079930000 | -3.825502000 |
| H  | -6.967481000  | -2.249781000 | -5.656170000 |
| H  | -10.004609000 | -1.939780000 | -2.114641000 |
| H  | -11.272007000 | -1.692196000 | 0.002513000  |
| H  | -10.076109000 | -1.246347000 | 2.128143000  |
| H  | -3.979021000  | -0.691027000 | 2.782810000  |
| H  | -4.692753000  | -0.329030000 | 5.141747000  |
| H  | -7.153059000  | -0.399375000 | 5.681793000  |
| H  | -8.764479000  | -0.822978000 | 3.839560000  |

Cartesian coordinates of DFT-optimized structure of **7a<sub>ox</sub>** complex by B3LYP/Def2-TZVP;  
6-31G(d,p)/CH<sub>3</sub>CN, charge = 3, multiplicity = 2

|    |              |              |              |
|----|--------------|--------------|--------------|
| Os | -5.504546000 | -0.051799000 | 0.032316000  |
| Os | 5.495434000  | 0.096412000  | 0.001501000  |
| N  | -5.064135000 | -2.104594000 | 0.293274000  |
| N  | 5.055101000  | 2.149257000  | -0.259401000 |
| N  | -5.975501000 | 0.236266000  | 2.059907000  |
| N  | 5.965917000  | -0.191717000 | -2.026200000 |
| N  | -7.584088000 | -0.081493000 | 0.045856000  |
| N  | 7.575056000  | 0.126023000  | -0.012600000 |
| N  | -5.992539000 | -0.354628000 | -1.989984000 |
| N  | 5.984061000  | 0.399271000  | 2.023647000  |
| N  | -5.125921000 | 2.012358000  | -0.236210000 |
| N  | 5.116833000  | -1.967743000 | 0.270192000  |
| C  | -5.084230000 | 0.398286000  | 3.064436000  |
| C  | 5.074354000  | -0.353725000 | -3.030470000 |
| H  | 4.031084000  | -0.324210000 | -2.743370000 |
| C  | -5.466786000 | 0.590312000  | 4.385176000  |

|   |               |              |              |
|---|---------------|--------------|--------------|
| C | 5.456543000   | -0.545813000 | -4.351310000 |
| H | 4.694118000   | -0.669709000 | -5.112088000 |
| C | -6.825452000  | 0.619379000  | 4.700484000  |
| C | 6.815117000   | -0.574958000 | -4.666985000 |
| C | -7.753159000  | 0.454052000  | 3.677239000  |
| C | 7.743115000   | -0.409640000 | -3.644001000 |
| H | -8.814328000  | 0.473367000  | 3.894878000  |
| C | -7.320130000  | 0.263043000  | 2.363810000  |
| C | 7.310455000   | -0.218563000 | -2.330465000 |
| C | -8.235351000  | 0.079283000  | 1.225048000  |
| C | 8.225988000   | -0.034802000 | -1.191953000 |
| C | -9.631258000  | 0.055668000  | 1.258326000  |
| C | 9.621886000   | -0.011229000 | -1.225613000 |
| H | -10.169806000 | 0.180929000  | 2.190045000  |
| H | 10.160180000  | -0.136521000 | -2.157475000 |
| C | -10.330189000 | -0.134122000 | 0.064686000  |
| C | 10.321141000  | 0.178565000  | -0.032165000 |
| C | -9.641272000  | -0.297920000 | -1.138459000 |
| C | 9.632554000   | 0.342411000  | 1.171160000  |
| C | -8.245081000  | -0.268501000 | -1.123850000 |
| C | 8.236359000   | 0.313038000  | 1.156916000  |
| C | -7.339836000  | -0.422846000 | -2.274759000 |
| C | 7.331427000   | 0.467450000  | 2.308064000  |
| C | -7.785946000  | -0.625962000 | -3.581917000 |
| C | 7.777888000   | 0.670593000  | 3.615092000  |
| H | -8.849176000  | -0.676898000 | -3.783792000 |
| C | -6.868701000  | -0.762930000 | -4.618629000 |
| C | 6.860916000   | 0.807620000  | 4.652040000  |
| C | -5.507215000  | -0.692262000 | -4.322771000 |
| C | 5.499353000   | 0.736985000  | 4.356543000  |
| H | 4.744960000   | 0.837262000  | 5.128753000  |
| C | -5.111545000  | -0.488696000 | -3.007523000 |
| C | 5.103328000   | 0.533394000  | 3.041403000  |
| H | 4.057360000   | 0.471446000  | 2.769986000  |
| C | -5.961169000  | -3.114714000 | 0.321701000  |
| C | 5.952151000   | 3.159353000  | -0.287933000 |
| H | -7.004575000  | -2.822897000 | 0.338505000  |
| H | 6.995548000   | 2.867518000  | -0.304898000 |
| C | -5.611173000  | -4.449412000 | 0.319084000  |
| C | 5.602176000   | 4.494060000  | -0.285236000 |
| H | -6.368738000  | -5.223767000 | 0.342961000  |
| H | 6.359751000   | 5.268401000  | -0.309207000 |
| C | -4.249368000  | -4.785514000 | 0.248431000  |
| C | 4.240388000   | 4.830185000  | -0.214398000 |
| C | -3.306392000  | -3.750118000 | 0.224702000  |
| C | 3.297392000   | 3.794800000  | -0.190559000 |
| H | -2.257593000  | -3.976082000 | 0.117616000  |
| H | 2.248607000   | 4.020773000  | -0.083349000 |
| C | -3.716965000  | -2.412757000 | 0.288147000  |
| C | 3.707944000   | 2.457446000  | -0.254062000 |
| C | -2.826991000  | -1.236763000 | 0.244284000  |

|   |              |              |              |
|---|--------------|--------------|--------------|
| C | 2.817937000  | 1.281467000  | -0.210057000 |
| C | -3.539863000 | -0.025792000 | 0.023963000  |
| C | 3.530776000  | 0.070476000  | 0.010245000  |
| C | -2.860796000 | 1.203321000  | -0.201292000 |
| C | 2.851723000  | -1.158624000 | 0.235592000  |
| C | -3.780413000 | 2.356808000  | -0.244721000 |
| C | 3.771317000  | -2.312143000 | 0.278946000  |
| C | -3.417524000 | 3.700245000  | -0.197182000 |
| C | 3.408365000  | -3.655562000 | 0.231574000  |
| H | -2.382288000 | 3.995507000  | -0.106116000 |
| H | 2.373099000  | -3.950791000 | 0.140727000  |
| C | -4.387538000 | 4.715227000  | -0.223014000 |
| C | 4.378354000  | -4.670579000 | 0.257303000  |
| C | -5.738374000 | 4.347558000  | -0.278154000 |
| C | 5.729211000  | -4.302955000 | 0.312180000  |
| H | -6.542056000 | 5.070910000  | -0.305206000 |
| H | 6.532871000  | -5.026333000 | 0.339146000  |
| C | -6.044032000 | 2.994343000  | -0.265871000 |
| C | 6.034916000  | -2.949750000 | 0.299756000  |
| H | -7.079778000 | 2.675672000  | -0.270569000 |
| H | 7.070674000  | -2.631116000 | 0.304256000  |
| C | -1.458743000 | 1.197493000  | -0.363158000 |
| C | 1.449680000  | -1.152764000 | 0.397528000  |
| C | -0.717988000 | 0.012241000  | 0.017878000  |
| C | 0.708930000  | 0.032497000  | 0.016491000  |
| C | -1.424543000 | -1.193221000 | 0.401010000  |
| C | 1.415483000  | 1.237953000  | -0.366685000 |
| C | -0.651658000 | -2.251997000 | 0.982728000  |
| C | 0.642595000  | 2.296746000  | -0.948364000 |
| H | -1.160132000 | -3.058473000 | 1.496195000  |
| H | 1.151067000  | 3.103230000  | -1.461823000 |
| C | 0.708777000  | -2.233165000 | 0.980282000  |
| C | -0.717838000 | 2.277902000  | -0.945905000 |
| H | 1.242091000  | -3.025894000 | 1.489546000  |
| H | -1.251152000 | 3.070630000  | -1.455167000 |
| O | -3.954861000 | -6.094793000 | 0.199273000  |
| O | 3.918199000  | -5.931626000 | 0.217705000  |
| O | 3.945902000  | 6.139457000  | -0.165191000 |
| O | -3.927434000 | 5.976296000  | -0.183239000 |
| C | -4.869004000 | 7.069529000  | -0.193139000 |
| C | -4.101997000 | 8.398202000  | -0.142567000 |
| C | -5.154642000 | 9.524226000  | -0.146182000 |
| C | -3.194168000 | 8.532214000  | -1.379831000 |
| C | -3.261662000 | 8.477637000  | 1.145962000  |
| C | 2.570090000  | 6.560596000  | -0.076097000 |
| C | 2.514238000  | 8.095057000  | -0.062909000 |
| C | 1.029064000  | 8.490487000  | 0.051562000  |
| C | 3.292726000  | 8.643263000  | 1.148101000  |
| C | 3.103157000  | 8.655923000  | -1.371222000 |
| C | -2.579037000 | -6.515911000 | 0.110350000  |
| C | -2.523158000 | -8.050373000 | 0.097293000  |

|   |              |               |              |
|---|--------------|---------------|--------------|
| C | -3.112141000 | -8.611133000  | 1.405623000  |
| C | -3.301573000 | -8.598697000  | -1.113709000 |
| C | -1.037974000 | -8.445795000  | -0.017062000 |
| C | 4.859731000  | -7.024898000  | 0.227513000  |
| C | 4.092664000  | -8.353544000  | 0.177180000  |
| C | 3.252090000  | -8.433039000  | -1.111189000 |
| C | 3.185060000  | -8.487434000  | 1.414622000  |
| C | 5.145269000  | -9.479606000  | 0.180682000  |
| H | -5.532913000 | 6.973128000   | 0.675234000  |
| H | -5.472742000 | 7.009201000   | -1.107400000 |
| H | -5.817579000 | 9.455680000   | 0.724814000  |
| H | -5.774726000 | 9.490744000   | -1.050181000 |
| H | -4.661004000 | 10.501949000  | -0.115038000 |
| H | -3.780492000 | 8.490174000   | -2.306169000 |
| H | -2.447308000 | 7.732184000   | -1.414366000 |
| H | -2.663706000 | 9.491170000   | -1.361216000 |
| H | -3.896152000 | 8.394818000   | 2.037101000  |
| H | -2.733971000 | 9.436901000   | 1.197440000  |
| H | -2.515476000 | 7.677378000   | 1.184991000  |
| H | 2.019043000  | 6.162717000   | -0.937867000 |
| H | 2.131740000  | 6.151121000   | 0.842989000  |
| H | 0.929185000  | 9.581602000   | 0.063173000  |
| H | 0.580753000  | 8.103387000   | 0.974752000  |
| H | 0.445833000  | 8.110269000   | -0.795917000 |
| H | 2.882352000  | 8.257488000   | 2.089532000  |
| H | 3.229465000  | 9.737107000   | 1.177199000  |
| H | 4.350491000  | 8.365550000   | 1.099387000  |
| H | 2.549692000  | 8.287064000   | -2.243740000 |
| H | 4.153183000  | 8.369228000   | -1.488703000 |
| H | 3.047407000  | 9.750478000   | -1.376288000 |
| H | -2.028078000 | -6.117957000  | 0.972142000  |
| H | -2.140603000 | -6.106498000  | -0.808724000 |
| H | -2.558726000 | -8.242193000  | 2.278139000  |
| H | -3.056381000 | -9.705686000  | 1.410786000  |
| H | -4.162176000 | -8.324435000  | 1.523022000  |
| H | -4.359342000 | -8.320986000  | -1.065081000 |
| H | -3.238302000 | -9.692544000  | -1.142702000 |
| H | -2.891148000 | -8.213007000  | -2.055154000 |
| H | -0.454788000 | -8.065483000  | 0.830406000  |
| H | -0.589621000 | -8.058788000  | -0.940270000 |
| H | -0.938079000 | -9.536911000  | -0.028554000 |
| H | 5.463639000  | -6.964520000  | 1.141659000  |
| H | 5.523481000  | -6.928582000  | -0.640990000 |
| H | 2.724341000  | -9.392280000  | -1.162496000 |
| H | 3.886422000  | -8.350321000  | -2.002450000 |
| H | 2.505936000  | -7.632745000  | -1.150145000 |
| H | 2.438221000  | -7.687387000  | 1.449226000  |
| H | 3.771554000  | -8.445327000  | 2.340849000  |
| H | 2.654576000  | -9.446381000  | 1.396183000  |
| H | 5.808054000  | -9.411141000  | -0.690437000 |
| H | 4.651589000  | -10.457313000 | 0.149688000  |

|   |               |              |              |
|---|---------------|--------------|--------------|
| H | 5.765514000   | -9.446089000 | 1.084568000  |
| H | -4.704578000  | 0.714222000  | 5.146170000  |
| H | -7.157836000  | 0.767634000  | 5.722273000  |
| H | -4.040881000  | 0.368834000  | 2.777613000  |
| H | -10.186483000 | -0.444773000 | -2.063163000 |
| H | -11.414438000 | -0.154586000 | 0.072322000  |
| H | -7.211052000  | -0.920971000 | -5.635651000 |
| H | -4.752617000  | -0.792496000 | -5.094788000 |
| H | -4.065652000  | -0.426722000 | -2.735820000 |
| H | 7.147216000   | -0.723266000 | -5.688860000 |
| H | 8.804223000   | -0.429021000 | -3.861930000 |
| H | 11.405388000  | 0.198996000  | -0.040093000 |
| H | 10.178012000  | 0.489266000  | 2.095717000  |
| H | 8.841172000   | 0.721501000  | 3.816686000  |
| H | 7.203537000   | 0.965681000  | 5.668967000  |

Cartesian coordinates of DFT-optimized structure of **8a<sub>ox</sub>** complex by B3LYP/Def2-TZVP; 6-31G(d,p)/CH<sub>3</sub>CN, charge = 3, multiplicity = 2

|    |              |              |              |
|----|--------------|--------------|--------------|
| Os | 5.421125000  | 0.949889000  | 0.030352000  |
| N  | 5.317845000  | -1.116797000 | 0.369302000  |
| N  | 5.828650000  | 1.385108000  | 2.050678000  |
| N  | 7.474476000  | 1.286099000  | 0.036246000  |
| N  | 5.957453000  | 0.669181000  | -1.987265000 |
| C  | 4.924125000  | 1.419245000  | 3.053796000  |
| H  | 3.901765000  | 1.197356000  | 2.775843000  |
| C  | 5.268184000  | 1.716888000  | 4.366247000  |
| H  | 4.496735000  | 1.729094000  | 5.127834000  |
| C  | 6.600462000  | 1.992686000  | 4.671191000  |
| H  | 6.903076000  | 2.228684000  | 5.685682000  |
| C  | 7.542231000  | 1.959602000  | 3.647176000  |
| H  | 8.584105000  | 2.169081000  | 3.857667000  |
| C  | 7.147099000  | 1.655932000  | 2.343713000  |
| C  | 8.081231000  | 1.600296000  | 1.205019000  |
| C  | 9.458364000  | 1.830720000  | 1.233769000  |
| H  | 9.963476000  | 2.082636000  | 2.158404000  |
| C  | 10.181161000 | 1.729459000  | 0.043976000  |
| C  | 9.535071000  | 1.403981000  | -1.149729000 |
| H  | 10.099290000 | 1.327232000  | -2.071312000 |
| C  | 8.156253000  | 1.182978000  | -1.128850000 |
| C  | 7.295034000  | 0.833311000  | -2.272685000 |
| C  | 7.773663000  | 0.672712000  | -3.573638000 |
| H  | 8.829094000  | 0.806678000  | -3.778114000 |
| C  | 6.897374000  | 0.341894000  | -4.602866000 |
| H  | 7.265118000  | 0.215666000  | -5.615433000 |
| C  | 5.545037000  | 0.178057000  | -4.305619000 |
| H  | 4.822043000  | -0.078887000 | -5.071489000 |
| C  | 5.116685000  | 0.349216000  | -2.995382000 |
| H  | 4.075415000  | 0.233159000  | -2.723351000 |
| N  | 4.021824000  | -1.616320000 | 0.385821000  |

|    |               |              |              |
|----|---------------|--------------|--------------|
| C  | -2.990920000  | 0.782690000  | -0.232863000 |
| C  | 2.973308000   | -0.660351000 | 0.262346000  |
| C  | -3.498072000  | -0.509906000 | 0.004774000  |
| C  | 3.480462000   | 0.632247000  | 0.024747000  |
| C  | -2.606643000  | -1.573603000 | 0.246374000  |
| C  | 2.589036000   | 1.695942000  | -0.216895000 |
| C  | -1.227555000  | -1.360334000 | 0.381680000  |
| C  | 1.209952000   | 1.482660000  | -0.352231000 |
| C  | -0.712074000  | -0.053940000 | 0.012711000  |
| C  | 0.694467000   | 0.176265000  | 0.016737000  |
| C  | -1.615066000  | 1.020299000  | -0.360316000 |
| C  | 1.597455000   | -0.897974000 | 0.389766000  |
| C  | -1.048959000  | 2.227560000  | -0.885773000 |
| C  | 1.031356000   | -2.105254000 | 0.915188000  |
| H  | -1.690437000  | 2.955949000  | -1.363583000 |
| H  | 1.672846000   | -2.833656000 | 1.392965000  |
| C  | 0.291457000   | 2.446941000  | -0.881937000 |
| C  | -0.309060000  | -2.324635000 | 0.911352000  |
| H  | 0.669915000   | 3.342260000  | -1.356828000 |
| H  | -0.687525000  | -3.219969000 | 1.386211000  |
| H  | 11.251393000  | 1.904761000  | 0.047032000  |
| N  | -3.296370000  | -2.814065000 | 0.364867000  |
| N  | -4.683902000  | -2.753749000 | 0.340669000  |
| C  | -5.117790000  | -4.015623000 | 0.383756000  |
| C  | -4.035210000  | -4.910784000 | 0.415184000  |
| C  | -2.903648000  | -4.122074000 | 0.387895000  |
| H  | -6.179232000  | -4.216541000 | 0.377548000  |
| H  | -4.073265000  | -5.989014000 | 0.443288000  |
| H  | -1.865805000  | -4.403470000 | 0.349621000  |
| Os | -5.438742000  | -0.827508000 | -0.000730000 |
| C  | -5.562465000  | -0.055741000 | 4.335250000  |
| C  | -5.134161000  | -0.226970000 | 3.025009000  |
| N  | -5.975003000  | -0.546762000 | 2.016895000  |
| C  | -7.312610000  | -0.710645000 | 2.302329000  |
| C  | -7.791193000  | -0.549978000 | 3.603292000  |
| C  | -6.914831000  | -0.219330000 | 4.632512000  |
| C  | -8.173905000  | -1.060129000 | 1.158495000  |
| N  | -7.492139000  | -1.163435000 | -0.006591000 |
| C  | -8.098965000  | -1.477452000 | -1.175375000 |
| C  | -9.476157000  | -1.707516000 | -1.204142000 |
| C  | -10.198941000 | -1.606081000 | -0.014355000 |
| C  | -9.552781000  | -1.280771000 | 1.179357000  |
| C  | -7.164847000  | -1.533280000 | -2.314072000 |
| N  | -5.846345000  | -1.262698000 | -2.021050000 |
| C  | -4.941835000  | -1.297017000 | -3.024173000 |
| C  | -5.285963000  | -1.594600000 | -4.336621000 |
| C  | -6.618293000  | -1.870153000 | -4.641552000 |
| C  | -7.560047000  | -1.836890000 | -3.617527000 |
| H  | -4.092873000  | -0.111108000 | 2.752963000  |
| H  | -4.839415000  | 0.201062000  | 5.101116000  |
| H  | -7.282541000  | -0.093046000 | 5.645084000  |

|   |               |              |              |
|---|---------------|--------------|--------------|
| H | -8.846644000  | -0.683761000 | 3.807780000  |
| H | -10.116993000 | -1.203871000 | 2.100933000  |
| H | -11.269218000 | -1.781108000 | -0.017425000 |
| H | -9.981325000  | -1.959285000 | -2.128786000 |
| H | -8.601960000  | -2.046188000 | -3.828006000 |
| H | -6.920959000  | -2.106100000 | -5.656039000 |
| H | -4.514523000  | -1.606953000 | -5.098215000 |
| H | -3.919429000  | -1.075321000 | -2.746236000 |
| N | -4.039433000  | 1.738665000  | -0.356310000 |
| N | -5.335463000  | 1.239150000  | -0.339718000 |
| C | -6.148734000  | 2.296902000  | -0.386507000 |
| C | -5.407844000  | 3.490497000  | -0.412842000 |
| C | -4.084058000  | 3.103641000  | -0.378549000 |
| N | 4.666294000   | 2.876102000  | -0.311098000 |
| H | -3.190304000  | 3.701182000  | -0.334814000 |
| H | -5.787483000  | 4.500362000  | -0.442224000 |
| H | -7.218864000  | 2.148964000  | -0.386345000 |
| N | 3.278758000   | 2.936407000  | -0.335370000 |
| C | 5.100178000   | 4.137972000  | -0.354321000 |
| C | 4.017596000   | 5.033125000  | -0.385878000 |
| C | 2.886035000   | 4.244412000  | -0.358609000 |
| C | 4.066449000   | -2.981300000 | 0.407862000  |
| C | 5.390235000   | -3.368153000 | 0.442175000  |
| C | 6.131121000   | -2.174553000 | 0.415961000  |
| H | 4.055650000   | 6.111352000  | -0.414067000 |
| H | 1.848193000   | 4.525814000  | -0.320402000 |
| H | 6.161618000   | 4.338900000  | -0.348059000 |
| H | 7.201251000   | -2.026605000 | 0.415852000  |
| H | 5.769876000   | -4.378020000 | 0.471477000  |
| H | 3.172692000   | -3.578833000 | 0.364065000  |

Cartesian coordinates of DFT-optimized structure of **9a<sub>ox</sub>** complex by B3LYP/Def2-TZVP;  
6-31G(d,p)/CH<sub>3</sub>CN, charge = 3, multiplicity = 2

|    |             |              |              |
|----|-------------|--------------|--------------|
| Os | 5.500286000 | 0.877132000  | -0.243143000 |
| N  | 5.418244000 | -1.197673000 | 0.179266000  |
| N  | 5.953177000 | 1.387030000  | 1.746754000  |
| N  | 7.571201000 | 1.198635000  | -0.273936000 |
| N  | 6.029123000 | 0.509351000  | -2.245272000 |
| C  | 5.054219000 | 1.468297000  | 2.753542000  |
| H  | 4.028015000 | 1.245803000  | 2.491621000  |
| C  | 5.411296000 | 1.814397000  | 4.050111000  |
| H  | 4.645483000 | 1.863061000  | 4.815807000  |
| C  | 6.748178000 | 2.090272000  | 4.334820000  |
| H  | 7.059946000 | 2.362484000  | 5.337334000  |
| C  | 7.682147000 | 2.010714000  | 3.306582000  |
| H  | 8.726825000 | 2.221541000  | 3.501089000  |
| C  | 7.275327000 | 1.659329000  | 2.018870000  |
| C  | 8.196219000 | 1.552828000  | 0.874338000  |
| C  | 9.575249000 | 1.773105000  | 0.878125000  |

|   |              |              |              |
|---|--------------|--------------|--------------|
| H | 10.093135000 | 2.056768000  | 1.786252000  |
| C | 10.282753000 | 1.621193000  | -0.315530000 |
| C | 9.619802000  | 1.255239000  | -1.488038000 |
| H | 10.171855000 | 1.137200000  | -2.412573000 |
| C | 8.239826000  | 1.045512000  | -1.441740000 |
| C | 7.362290000  | 0.654160000  | -2.557794000 |
| C | 7.819890000  | 0.433747000  | -3.857532000 |
| H | 8.872572000  | 0.553536000  | -4.083516000 |
| C | 6.926420000  | 0.061280000  | -4.856909000 |
| H | 7.277419000  | -0.110581000 | -5.868640000 |
| C | 5.578543000  | -0.085734000 | -4.531131000 |
| H | 4.842986000  | -0.375170000 | -5.272978000 |
| C | 5.170235000  | 0.145058000  | -3.224084000 |
| H | 4.133640000  | 0.042862000  | -2.930621000 |
| C | 6.471014000  | -2.038746000 | 0.264658000  |
| H | 7.450703000  | -1.576342000 | 0.243122000  |
| C | 6.347215000  | -3.409549000 | 0.365285000  |
| H | 7.222566000  | -4.044477000 | 0.432159000  |
| C | 5.059739000  | -3.969626000 | 0.344261000  |
| C | 3.956285000  | -3.108328000 | 0.264543000  |
| H | 2.958247000  | -3.511048000 | 0.196654000  |
| C | 4.141411000  | -1.722298000 | 0.221626000  |
| C | -2.904073000 | 0.741640000  | -0.522856000 |
| C | 3.067098000  | -0.714597000 | 0.107608000  |
| C | -3.425006000 | -0.500976000 | -0.119978000 |
| C | 3.560319000  | 0.576600000  | -0.218814000 |
| C | -2.542621000 | -1.526976000 | 0.262836000  |
| C | 2.691903000  | 1.656381000  | -0.527427000 |
| C | -1.158211000 | -1.312633000 | 0.368112000  |
| C | 1.310109000  | 1.403473000  | -0.671849000 |
| C | -0.631239000 | -0.070321000 | -0.159839000 |
| C | 0.779877000  | 0.146805000  | -0.180420000 |
| C | -1.522658000 | 0.953751000  | -0.666946000 |
| C | 1.677533000  | -0.889403000 | 0.291291000  |
| C | -0.940152000 | 2.080269000  | -1.332190000 |
| C | 1.099378000  | -2.008454000 | 0.974642000  |
| H | -1.569572000 | 2.747501000  | -1.906093000 |
| H | 1.741256000  | -2.677696000 | 1.533270000  |
| C | 0.402912000  | 2.296062000  | -1.330070000 |
| C | -0.245791000 | -2.207194000 | 1.014679000  |
| H | 0.797927000  | 3.128311000  | -1.898341000 |
| H | -0.629476000 | -3.027698000 | 1.606706000  |
| O | 4.985686000  | -5.307854000 | 0.394820000  |
| C | 3.698100000  | -5.957514000 | 0.364290000  |
| C | 3.901073000  | -7.476667000 | 0.453974000  |
| C | 2.501846000  | -8.121403000 | 0.408409000  |
| C | 4.740129000  | -7.970744000 | -0.739805000 |
| C | 4.597745000  | -7.839151000 | 1.779272000  |
| H | 3.098250000  | -5.597598000 | 1.209867000  |
| H | 3.188165000  | -5.691029000 | -0.570074000 |
| H | 2.587603000  | -9.211766000 | 0.473684000  |

|    |               |              |              |
|----|---------------|--------------|--------------|
| H  | 1.980096000   | -7.881830000 | -0.526109000 |
| H  | 1.876958000   | -7.783793000 | 1.244152000  |
| H  | 4.257060000   | -7.721964000 | -1.692848000 |
| H  | 4.857655000   | -9.059626000 | -0.696887000 |
| H  | 5.738487000   | -7.521685000 | -0.737328000 |
| H  | 4.005607000   | -7.505989000 | 2.640674000  |
| H  | 5.587456000   | -7.376244000 | 1.847244000  |
| H  | 4.724176000   | -8.924965000 | 1.858254000  |
| H  | 11.354119000  | 1.788241000  | -0.331917000 |
| N  | -3.244048000  | -2.733808000 | 0.546552000  |
| N  | -4.631797000  | -2.663241000 | 0.512938000  |
| C  | -5.078244000  | -3.902914000 | 0.730296000  |
| C  | -4.004825000  | -4.796127000 | 0.886067000  |
| C  | -2.865054000  | -4.030403000 | 0.751343000  |
| H  | -6.141786000  | -4.091193000 | 0.749815000  |
| H  | -4.053741000  | -5.859861000 | 1.062304000  |
| H  | -1.830557000  | -4.325781000 | 0.752853000  |
| Os | -5.378351000  | -0.804201000 | -0.095036000 |
| C  | -5.518667000  | 0.593183000  | 4.085837000  |
| C  | -5.079948000  | 0.228353000  | 2.819592000  |
| N  | -5.911767000  | -0.230880000 | 1.858245000  |
| C  | -7.255035000  | -0.339910000 | 2.151295000  |
| C  | -7.744558000  | 0.014914000  | 3.409725000  |
| C  | -6.875847000  | 0.485560000  | 4.389348000  |
| C  | -8.110736000  | -0.845641000 | 1.063581000  |
| N  | -7.419931000  | -1.121141000 | -0.070187000 |
| C  | -8.022138000  | -1.597141000 | -1.187785000 |
| C  | -9.401095000  | -1.818386000 | -1.193533000 |
| C  | -10.131997000 | -1.541669000 | -0.036595000 |
| C  | -9.491390000  | -1.052198000 | 1.103339000  |
| C  | -7.079952000  | -1.822934000 | -2.297780000 |
| N  | -5.760213000  | -1.519008000 | -2.037216000 |
| C  | -4.852138000  | -1.705205000 | -3.020986000 |
| C  | -5.190360000  | -2.187686000 | -4.278648000 |
| C  | -6.523175000  | -2.497601000 | -4.549152000 |
| C  | -7.469460000  | -2.311310000 | -3.546346000 |
| H  | -4.035436000  | 0.297726000  | 2.543157000  |
| H  | -4.800996000  | 0.954741000  | 4.813744000  |
| H  | -7.252457000  | 0.762155000  | 5.368313000  |
| H  | -8.803490000  | -0.077604000 | 3.619596000  |
| H  | -10.062182000 | -0.839682000 | 1.999360000  |
| H  | -11.203637000 | -1.707967000 | -0.023234000 |
| H  | -9.902247000  | -2.197549000 | -2.076135000 |
| H  | -8.511380000  | -2.544429000 | -3.730389000 |
| H  | -6.821941000  | -2.876602000 | -5.520647000 |
| H  | -4.414952000  | -2.314926000 | -5.025755000 |
| H  | -3.829483000  | -1.453232000 | -2.770212000 |
| N  | -3.945141000  | 1.678703000  | -0.783611000 |
| N  | -5.245247000  | 1.191555000  | -0.713864000 |
| C  | -6.051364000  | 2.236880000  | -0.916579000 |
| C  | -5.302930000  | 3.412073000  | -1.098322000 |

|   |              |              |              |
|---|--------------|--------------|--------------|
| C | -3.981753000 | 3.027929000  | -0.995365000 |
| C | 3.405621000  | 2.942888000  | -0.665046000 |
| N | 4.789417000  | 2.832060000  | -0.654901000 |
| C | 5.529328000  | 3.948541000  | -0.761746000 |
| C | 4.999361000  | 5.227942000  | -0.855576000 |
| C | 3.606320000  | 5.364773000  | -0.801870000 |
| C | 2.820591000  | 4.203819000  | -0.699257000 |
| O | 2.938428000  | 6.527183000  | -0.831277000 |
| C | 3.674774000  | 7.765828000  | -0.916359000 |
| C | 2.686154000  | 8.940028000  | -0.903133000 |
| C | 3.522154000  | 10.231736000 | -0.996705000 |
| C | 1.878287000  | 8.937424000  | 0.408523000  |
| C | 1.736460000  | 8.846573000  | -2.112373000 |
| H | 4.261997000  | 7.765327000  | -1.843258000 |
| H | 4.361367000  | 7.828599000  | -0.062884000 |
| H | 4.113686000  | 10.260808000 | -1.919868000 |
| H | 4.210413000  | 10.327065000 | -0.148036000 |
| H | 2.863902000  | 11.107733000 | -0.993420000 |
| H | 2.539993000  | 9.010030000  | 1.280507000  |
| H | 1.284529000  | 8.023020000  | 0.507746000  |
| H | 1.192816000  | 9.792187000  | 0.434803000  |
| H | 2.295758000  | 8.857054000  | -3.056028000 |
| H | 1.046479000  | 9.698115000  | -2.121158000 |
| H | 1.141546000  | 7.928126000  | -2.080005000 |
| H | 5.668537000  | 6.073490000  | -0.942310000 |
| H | 6.603764000  | 3.806676000  | -0.762651000 |
| H | 1.750482000  | 4.326075000  | -0.613494000 |
| H | -3.085603000 | 3.622654000  | -1.023319000 |
| H | -5.675922000 | 4.410171000  | -1.270592000 |
| H | -7.122284000 | 2.094657000  | -0.908651000 |

Cartesian coordinates of DFT-optimized structure of **10a<sub>ox</sub>** complex by B3LYP/Def2-TZVP;  
6-31G(d,p)/CH<sub>3</sub>CN, charge = 3, multiplicity = 2

|    |              |              |              |
|----|--------------|--------------|--------------|
| Os | -2.286521000 | -1.285446000 | 0.065875000  |
| N  | -3.054971000 | 0.671383000  | 0.284719000  |
| N  | -2.575741000 | -1.761471000 | 2.096055000  |
| N  | -4.019239000 | -2.437026000 | 0.040129000  |
| N  | -2.806462000 | -1.323335000 | -1.972550000 |
| C  | -1.792267000 | -1.366035000 | 3.124270000  |
| H  | -0.945694000 | -0.745379000 | 2.860202000  |
| C  | -2.044474000 | -1.723333000 | 4.442441000  |
| H  | -1.378159000 | -1.375396000 | 5.223707000  |
| C  | -3.151230000 | -2.522290000 | 4.728297000  |
| H  | -3.376727000 | -2.819487000 | 5.746813000  |
| C  | -3.968296000 | -2.932923000 | 3.679702000  |
| H  | -4.836285000 | -3.551224000 | 3.874555000  |
| C  | -3.673567000 | -2.547994000 | 2.371001000  |
| C  | -4.490237000 | -2.937061000 | 1.208255000  |
| C  | -5.638793000 | -3.731653000 | 1.212517000  |

|   |              |              |              |
|---|--------------|--------------|--------------|
| H | -6.031690000 | -4.140152000 | 2.135846000  |
| C | -6.278330000 | -3.995165000 | -0.000107000 |
| C | -5.774939000 | -3.472033000 | -1.192489000 |
| H | -6.272988000 | -3.680492000 | -2.131726000 |
| C | -4.624105000 | -2.682225000 | -1.147539000 |
| C | -3.939178000 | -2.043678000 | -2.284535000 |
| C | -4.384914000 | -2.140373000 | -3.603720000 |
| H | -5.277184000 | -2.712304000 | -3.828269000 |
| C | -3.686165000 | -1.503005000 | -4.624253000 |
| H | -4.028975000 | -1.575491000 | -5.650758000 |
| C | -2.542747000 | -0.773163000 | -4.299906000 |
| H | -1.963797000 | -0.257842000 | -5.057949000 |
| C | -2.137780000 | -0.707427000 | -2.973229000 |
| H | -1.255320000 | -0.153366000 | -2.680106000 |
| C | -4.362192000 | 1.014805000  | 0.277423000  |
| H | -5.067187000 | 0.192065000  | 0.288950000  |
| C | -4.810931000 | 2.318894000  | 0.246603000  |
| H | -5.870960000 | 2.543216000  | 0.241685000  |
| C | -3.862217000 | 3.352891000  | 0.186592000  |
| C | -2.503160000 | 3.014746000  | 0.204292000  |
| H | -1.754945000 | 3.784618000  | 0.106786000  |
| C | -2.103343000 | 1.675892000  | 0.293642000  |
| C | 5.429594000  | 2.119191000  | 0.142571000  |
| C | -0.708676000 | 1.190186000  | 0.298808000  |
| C | 5.361638000  | 3.522216000  | 0.342092000  |
| C | -0.640697000 | -0.212857000 | 0.099473000  |
| C | 4.113020000  | 4.162863000  | 0.503448000  |
| C | 0.607926000  | -0.853419000 | -0.062228000 |
| C | 2.920556000  | 3.433600000  | 0.604892000  |
| C | 1.800315000  | -0.124069000 | -0.164014000 |
| C | 2.966759000  | 2.029055000  | 0.248384000  |
| C | 1.754118000  | 1.280488000  | 0.192461000  |
| C | 4.234666000  | 1.389215000  | -0.048132000 |
| C | 0.486233000  | 1.920297000  | 0.489076000  |
| C | 4.191479000  | 0.063232000  | -0.592422000 |
| C | 0.529363000  | 3.246383000  | 1.033104000  |
| H | 5.085089000  | -0.356000000 | -1.035824000 |
| H | -0.364303000 | 3.665702000  | 1.476320000  |
| C | 3.039991000  | -0.658394000 | -0.642344000 |
| C | 1.680841000  | 3.968031000  | 1.082988000  |
| H | 3.055071000  | -1.628832000 | -1.121915000 |
| H | 1.665719000  | 4.938574000  | 1.562350000  |
| O | -4.340369000 | 4.604889000  | 0.106928000  |
| C | -3.425590000 | 5.718136000  | 0.050919000  |
| C | -4.228586000 | 7.024602000  | -0.021987000 |
| C | -3.207662000 | 8.178161000  | -0.076972000 |
| C | -5.099572000 | 7.039568000  | -1.292503000 |
| C | -5.112864000 | 7.172585000  | 1.230639000  |
| H | -2.792894000 | 5.703497000  | 0.947876000  |
| H | -2.786290000 | 5.609874000  | -0.834413000 |
| H | -3.729000000 | 9.140410000  | -0.130449000 |

|   |              |              |              |
|---|--------------|--------------|--------------|
| H | -2.559261000 | 8.098820000  | -0.958110000 |
| H | -2.569883000 | 8.192120000  | 0.815312000  |
| H | -4.483478000 | 6.944459000  | -2.195282000 |
| H | -5.654957000 | 7.981847000  | -1.362490000 |
| H | -5.823423000 | 6.218308000  | -1.286945000 |
| H | -4.505722000 | 7.173225000  | 2.144333000  |
| H | -5.837529000 | 6.355388000  | 1.304660000  |
| H | -5.668367000 | 8.116763000  | 1.195597000  |
| H | -7.171012000 | -4.610797000 | -0.016081000 |
| N | 0.477973000  | -2.267330000 | -0.137895000 |
| C | 1.363031000  | -3.306831000 | -0.074971000 |
| C | 0.643562000  | -4.483538000 | -0.084849000 |
| C | -0.707442000 | -4.097304000 | -0.131881000 |
| N | -0.815652000 | -2.766952000 | -0.151271000 |
| H | -1.599246000 | -4.707204000 | -0.138919000 |
| H | 1.040280000  | -5.486703000 | -0.051624000 |
| H | 2.423639000  | -3.143285000 | 0.005291000  |
| N | 4.243038000  | 5.576739000  | 0.579443000  |
| N | 5.536677000  | 6.076272000  | 0.593879000  |
| C | 5.428546000  | 7.406634000  | 0.574446000  |
| C | 4.077602000  | 7.792945000  | 0.526313000  |
| C | 3.358081000  | 6.616274000  | 0.515808000  |
| C | 6.824234000  | 1.633362000  | 0.148304000  |
| C | 7.223920000  | 0.294450000  | 0.237321000  |
| C | 8.582945000  | -0.043812000 | 0.255518000  |
| C | 9.531767000  | 0.990130000  | 0.196429000  |
| C | 9.083136000  | 2.294265000  | 0.165956000  |
| N | 7.775949000  | 2.637790000  | 0.158130000  |
| O | 9.060937000  | -1.295886000 | 0.334856000  |
| C | 8.146005000  | -2.409064000 | 0.389833000  |
| C | 8.948813000  | -3.715660000 | 0.462424000  |
| C | 7.927723000  | -4.869126000 | 0.516344000  |
| C | 9.833646000  | -3.863097000 | -0.789873000 |
| C | 9.819211000  | -3.731395000 | 1.733332000  |
| H | 6.320360000  | 8.016507000  | 0.582286000  |
| H | 3.680971000  | 8.796134000  | 0.492802000  |
| H | 2.297534000  | 6.452747000  | 0.434656000  |
| H | 6.475625000  | -0.475415000 | 0.334185000  |
| H | 10.591778000 | 0.765732000  | 0.201790000  |
| H | 9.788208000  | 3.116950000  | 0.155182000  |
| H | 7.513738000  | -2.393864000 | -0.507417000 |
| H | 7.506297000  | -2.301199000 | 1.274919000  |
| H | 7.278936000  | -4.790176000 | 1.397234000  |
| H | 8.448927000  | -5.831462000 | 0.569554000  |
| H | 7.290339000  | -4.882549000 | -0.376232000 |
| H | 9.226924000  | -3.863193000 | -1.703846000 |
| H | 10.389027000 | -4.807354000 | -0.755065000 |
| H | 10.558431000 | -3.045938000 | -0.863135000 |
| H | 9.202712000  | -3.636667000 | 2.635874000  |
| H | 10.543173000 | -2.910228000 | 1.728533000  |
| H | 10.374442000 | -4.673782000 | 1.803092000  |

|    |              |             |              |
|----|--------------|-------------|--------------|
| Os | 7.007534000  | 4.594592000 | 0.377341000  |
| C  | 7.259651000  | 4.078910000 | 4.742902000  |
| C  | 6.855912000  | 4.014303000 | 3.415794000  |
| N  | 7.525583000  | 4.630994000 | 2.416259000  |
| C  | 8.658073000  | 5.350971000 | 2.729886000  |
| C  | 9.102558000  | 5.446572000 | 4.049566000  |
| C  | 8.402803000  | 4.808416000 | 5.068919000  |
| C  | 9.344178000  | 5.990268000 | 1.594024000  |
| N  | 8.740477000  | 5.745937000 | 0.405594000  |
| C  | 9.212688000  | 6.246692000 | -0.761721000 |
| C  | 10.361330000 | 7.041167000 | -0.764319000 |
| C  | 10.999671000 | 7.303809000 | 0.449121000  |
| C  | 10.495042000 | 6.779935000 | 1.640652000  |
| C  | 8.397137000  | 5.858480000 | -1.925534000 |
| N  | 7.298947000  | 5.071909000 | -1.652208000 |
| C  | 6.516473000  | 4.677207000 | -2.681468000 |
| C  | 6.770058000  | 5.035338000 | -3.999151000 |
| C  | 7.877187000  | 5.834362000 | -4.283366000 |
| C  | 8.693241000  | 6.244217000 | -3.233681000 |
| H  | 5.973678000  | 3.460553000 | 3.121400000  |
| H  | 6.679961000  | 3.562997000 | 5.499975000  |
| H  | 8.744653000  | 4.880034000 | 6.095804000  |
| H  | 9.994663000  | 6.018245000 | 4.275417000  |
| H  | 10.992182000 | 6.987730000 | 2.580521000  |
| H  | 11.892396000 | 7.919343000 | 0.466399000  |
| H  | 10.755182000 | 7.450233000 | -1.686989000 |
| H  | 9.561507000  | 6.862536000 | -3.427243000 |
| H  | 8.103750000  | 6.132192000 | -5.301460000 |
| H  | 6.104505000  | 4.687976000 | -4.781321000 |
| H  | 5.669585000  | 4.056438000 | -2.418674000 |

Cartesian coordinates of DFT-optimized structure of **11a<sub>ox</sub>** complex by B3LYP/Def2-TZVP;  
6-31G(d,p)/CH<sub>3</sub>CN, charge = 3, multiplicity = 2

|    |              |              |              |
|----|--------------|--------------|--------------|
| Os | 2.853548000  | 0.446678000  | 0.038747000  |
| N  | 1.726936000  | -1.329058000 | 0.237479000  |
| N  | 3.319315000  | 0.532313000  | 2.088749000  |
| N  | 4.806674000  | -0.253486000 | 0.105164000  |
| N  | 3.270705000  | 0.016147000  | -1.976842000 |
| N  | -7.789139000 | 2.401076000  | 0.035473000  |
| C  | 2.493743000  | 0.943487000  | 3.077342000  |
| H  | 1.504839000  | 1.254174000  | 2.765351000  |
| C  | 2.874150000  | 0.972138000  | 4.412554000  |
| H  | 2.166219000  | 1.313084000  | 5.159600000  |
| C  | 4.160991000  | 0.560671000  | 4.759662000  |
| H  | 4.489847000  | 0.569818000  | 5.793261000  |
| C  | 5.021295000  | 0.135028000  | 3.752582000  |
| H  | 6.025731000  | -0.190706000 | 3.995221000  |
| C  | 4.592875000  | 0.124556000  | 2.423943000  |
| C  | 5.441282000  | -0.312523000 | 1.301905000  |

|   |               |              |              |
|---|---------------|--------------|--------------|
| C | 6.765170000   | -0.752405000 | 1.366522000  |
| H | 7.290299000   | -0.805157000 | 2.312717000  |
| C | 7.408841000   | -1.124530000 | 0.184858000  |
| C | 6.736999000   | -1.056291000 | -1.037040000 |
| H | 7.240489000   | -1.344865000 | -1.951883000 |
| C | 5.413605000   | -0.610339000 | -1.053620000 |
| C | 4.537613000   | -0.465782000 | -2.229216000 |
| C | 4.933981000   | -0.790775000 | -3.527749000 |
| H | 5.933587000   | -1.169186000 | -3.705182000 |
| C | 4.047654000   | -0.631537000 | -4.588243000 |
| H | 4.352013000   | -0.882443000 | -5.598669000 |
| C | 2.766554000   | -0.147060000 | -4.324365000 |
| H | 2.038349000   | -0.007088000 | -5.115317000 |
| C | 2.418286000   | 0.162222000  | -3.016137000 |
| H | 1.434352000   | 0.539820000  | -2.768818000 |
| C | 2.228583000   | -2.583419000 | 0.277958000  |
| H | 3.307603000   | -2.658578000 | 0.343256000  |
| C | 1.449775000   | -3.721118000 | 0.229863000  |
| H | 1.899830000   | -4.706143000 | 0.264891000  |
| C | 0.058954000   | -3.576804000 | 0.097624000  |
| C | -0.478707000  | -2.284196000 | 0.064371000  |
| H | -1.536565000  | -2.142163000 | -0.088133000 |
| C | 0.354230000   | -1.163832000 | 0.175585000  |
| C | -4.463327000  | 4.577171000  | -0.337309000 |
| C | -0.085082000  | 0.244678000  | 0.134772000  |
| C | -5.570813000  | 3.716961000  | -0.166630000 |
| C | 1.010263000   | 1.131958000  | -0.020650000 |
| C | -5.380818000  | 2.324585000  | 0.020460000  |
| C | 0.787945000   | 2.512999000  | -0.216847000 |
| C | -6.661257000  | 1.588059000  | 0.024943000  |
| C | -6.813260000  | 0.208808000  | -0.073348000 |
| H | -5.956667000  | -0.440557000 | -0.181359000 |
| C | -8.087308000  | -0.382416000 | -0.080710000 |
| C | -9.211201000  | 0.450074000  | -0.000761000 |
| H | -10.223479000 | 0.068626000  | 0.006907000  |
| C | -9.002294000  | 1.821525000  | 0.037226000  |
| H | -9.849491000  | 2.497078000  | 0.059838000  |
| C | -4.070542000  | 1.821077000  | 0.187028000  |
| C | -0.499256000  | 3.031482000  | -0.398598000 |
| C | -2.946809000  | 2.681849000  | -0.123542000 |
| C | -1.619974000  | 2.160023000  | -0.094190000 |
| C | -3.161567000  | 4.077853000  | -0.460988000 |
| C | -1.394403000  | 0.769893000  | 0.243935000  |
| C | -2.043830000  | 4.839130000  | -0.938878000 |
| C | -2.511497000  | 0.027433000  | 0.748203000  |
| H | -2.210938000  | 5.804390000  | -1.398967000 |
| H | -2.339341000  | -0.927258000 | 1.228497000  |
| C | -0.780118000  | 4.342286000  | -0.908856000 |
| C | -3.778242000  | 0.523914000  | 0.719986000  |
| H | 0.018223000   | 4.929288000  | -1.344441000 |
| H | -4.572993000  | -0.051804000 | 1.176539000  |

|   |               |              |              |
|---|---------------|--------------|--------------|
| O | -0.656322000  | -4.709584000 | 0.003394000  |
| O | -8.115955000  | -1.720667000 | -0.174428000 |
| C | -9.387707000  | -2.402075000 | -0.202361000 |
| C | -9.145526000  | -3.911943000 | -0.337883000 |
| C | -10.530249000 | -4.588698000 | -0.362356000 |
| C | -8.335460000  | -4.428933000 | 0.866026000  |
| C | -8.396746000  | -4.212755000 | -1.650177000 |
| C | -2.089284000  | -4.641398000 | -0.137494000 |
| C | -2.656615000  | -6.066901000 | -0.194084000 |
| C | -4.184770000  | -5.937969000 | -0.349227000 |
| C | -2.073304000  | -6.821760000 | -1.403646000 |
| C | -2.328089000  | -6.818583000 | 1.109759000  |
| H | -9.972799000  | -2.026594000 | -1.051286000 |
| H | -9.929215000  | -2.179554000 | 0.725729000  |
| H | -11.132088000 | -4.241444000 | -1.211015000 |
| H | -11.091534000 | -4.387152000 | 0.558153000  |
| H | -10.417525000 | -5.674735000 | -0.454457000 |
| H | -8.859461000  | -4.232004000 | 1.809458000  |
| H | -7.351716000  | -3.950978000 | 0.917277000  |
| H | -8.183461000  | -5.511390000 | 0.785609000  |
| H | -8.962309000  | -3.854891000 | -2.519410000 |
| H | -8.251032000  | -5.292847000 | -1.765883000 |
| H | -7.412254000  | -3.733973000 | -1.664955000 |
| H | -2.505275000  | -4.094523000 | 0.718404000  |
| H | -2.331235000  | -4.094240000 | -1.057554000 |
| H | -4.644575000  | -6.931672000 | -0.391277000 |
| H | -4.450830000  | -5.406659000 | -1.271176000 |
| H | -4.630045000  | -5.398362000 | 0.495614000  |
| H | -2.302266000  | -6.301919000 | -2.342213000 |
| H | -2.499961000  | -7.829506000 | -1.465038000 |
| H | -0.985687000  | -6.918345000 | -1.325108000 |
| H | -2.748497000  | -6.300672000 | 1.980777000  |
| H | -1.246702000  | -6.906477000 | 1.255528000  |
| H | -2.750977000  | -7.829387000 | 1.083406000  |
| H | 8.437068000   | -1.467935000 | 0.216208000  |
| N | 2.006622000   | 3.248982000  | -0.245199000 |
| C | 2.315756000   | 4.578083000  | -0.185741000 |
| C | 3.689894000   | 4.698076000  | -0.141411000 |
| C | 4.181772000   | 3.381967000  | -0.152567000 |
| N | 3.175916000   | 2.504569000  | -0.201245000 |
| N | -4.854499000  | 5.945056000  | -0.401402000 |
| C | -4.179150000  | 7.130593000  | -0.343359000 |
| C | -5.105427000  | 8.153562000  | -0.347184000 |
| C | -6.360159000  | 7.522786000  | -0.385358000 |
| N | -6.217990000  | 6.195060000  | -0.404563000 |
| H | 5.200850000   | 3.025347000  | -0.115588000 |
| H | 4.259642000   | 5.613636000  | -0.096079000 |
| H | 1.552953000   | 5.335942000  | -0.144259000 |
| H | -3.106245000  | 7.169092000  | -0.270889000 |
| H | -4.901643000  | 9.212935000  | -0.316083000 |
| H | -7.349939000  | 7.955787000  | -0.388157000 |

|    |               |             |              |
|----|---------------|-------------|--------------|
| Os | -7.386524000  | 4.467233000 | -0.174086000 |
| C  | -7.183360000  | 4.893401000 | 4.203238000  |
| C  | -6.885710000  | 4.603349000 | 2.878075000  |
| N  | -7.739932000  | 4.863639000 | 1.863370000  |
| C  | -8.956105000  | 5.439381000 | 2.157902000  |
| C  | -9.301253000  | 5.747972000 | 3.474408000  |
| C  | -8.412584000  | 5.476109000 | 4.509985000  |
| C  | -9.838861000  | 5.694102000 | 1.006390000  |
| C  | -11.105980000 | 6.280911000 | 1.029778000  |
| C  | -11.793289000 | 6.443076000 | -0.174262000 |
| C  | -11.220839000 | 6.023996000 | -1.376376000 |
| C  | -9.951791000  | 5.441667000 | -1.349372000 |
| N  | -9.301105000  | 5.294533000 | -0.170721000 |
| C  | -9.181098000  | 4.936187000 | -2.498861000 |
| N  | -7.937887000  | 4.421017000 | -2.204585000 |
| C  | -7.184777000  | 3.932189000 | -3.214923000 |
| C  | -7.611043000  | 3.932356000 | -4.536739000 |
| C  | -8.866892000  | 4.454962000 | -4.843713000 |
| C  | -9.653389000  | 4.957919000 | -3.811867000 |
| H  | -6.456377000  | 4.661938000 | 4.973449000  |
| H  | -5.943611000  | 4.150650000 | 2.597254000  |
| H  | -10.263282000 | 6.199161000 | 3.685383000  |
| H  | -8.676704000  | 5.714272000 | 5.534667000  |
| H  | -11.553101000 | 6.607441000 | 1.960990000  |
| H  | -12.777975000 | 6.897442000 | -0.175756000 |
| H  | -11.757349000 | 6.151739000 | -2.308783000 |
| H  | -6.217016000  | 3.536580000 | -2.934811000 |
| H  | -6.961131000  | 3.527311000 | -5.304068000 |
| H  | -9.229674000  | 4.470495000 | -5.865763000 |
| H  | -10.634334000 | 5.366202000 | -4.023059000 |

Cartesian coordinates of DFT-optimized structure of **7box** complex by B3LYP/Def2-TZVP;  
6-31G(d,p)/CH<sub>3</sub>CN, charge = 3, multiplicity = 2

|    |              |              |              |
|----|--------------|--------------|--------------|
| Ru | -5.468994000 | -0.050317000 | 0.032798000  |
| Ru | 5.481207000  | 0.097058000  | 0.020057000  |
| N  | -5.060009000 | -2.103965000 | 0.306338000  |
| N  | 5.049038000  | 2.141015000  | -0.258108000 |
| N  | -5.914155000 | 0.250776000  | 2.066988000  |
| N  | 5.973222000  | -0.196041000 | -2.000480000 |
| N  | -7.561349000 | -0.072076000 | 0.080284000  |
| N  | 7.542736000  | 0.130500000  | 0.051233000  |
| N  | -5.997816000 | -0.364460000 | -1.979480000 |
| N  | 5.902622000  | 0.406597000  | 2.055778000  |
| N  | -5.117729000 | 2.011372000  | -0.257422000 |
| N  | 5.111690000  | -1.961432000 | 0.286935000  |
| C  | -5.003819000 | 0.413117000  | 3.047007000  |
| C  | 5.107107000  | -0.359363000 | -3.020039000 |
| H  | 4.057285000  | -0.332609000 | -2.754801000 |
| C  | -5.360412000 | 0.617140000  | 4.376043000  |

|   |               |              |              |
|---|---------------|--------------|--------------|
| C | 5.516525000   | -0.550327000 | -4.335375000 |
| H | 4.772007000   | -0.676174000 | -5.113540000 |
| C | -6.711627000  | 0.656118000  | 4.712969000  |
| C | 6.881196000   | -0.574944000 | -4.619576000 |
| C | -7.660212000  | 0.488326000  | 3.707481000  |
| C | 7.786745000   | -0.407199000 | -3.575694000 |
| H | -8.716920000  | 0.514795000  | 3.944620000  |
| C | -7.247699000  | 0.285887000  | 2.390138000  |
| C | 7.320554000   | -0.218940000 | -2.272860000 |
| C | -8.184971000  | 0.097316000  | 1.263948000  |
| C | 8.213790000   | -0.032235000 | -1.111051000 |
| C | -9.581046000  | 0.078913000  | 1.325138000  |
| C | 9.611185000   | -0.009225000 | -1.117566000 |
| H | -10.104830000 | 0.211010000  | 2.264144000  |
| H | 10.170620000  | -0.137417000 | -2.036613000 |
| C | -10.297712000 | -0.116154000 | 0.143142000  |
| C | 10.283340000  | 0.184190000  | 0.091025000  |
| C | -9.630553000  | -0.289908000 | -1.070602000 |
| C | 9.569579000   | 0.351470000  | 1.279420000  |
| C | -8.233206000  | -0.264285000 | -1.073127000 |
| C | 8.172996000   | 0.320654000  | 1.231965000  |
| C | -7.343705000  | -0.429509000 | -2.240979000 |
| C | 7.239942000   | 0.476491000  | 2.366667000  |
| C | -7.812173000  | -0.639145000 | -3.538300000 |
| C | 7.661798000   | 0.681813000  | 3.681845000  |
| H | -8.877990000  | -0.688459000 | -3.726062000 |
| C | -6.907622000  | -0.784615000 | -4.586851000 |
| C | 6.721674000   | 0.819137000  | 4.699248000  |
| C | -5.543497000  | -0.715622000 | -4.312401000 |
| C | 5.367469000   | 0.746364000  | 4.376219000  |
| H | 4.597002000   | 0.846775000  | 5.132563000  |
| C | -5.130349000  | -0.504949000 | -3.000792000 |
| C | 5.002732000   | 0.539945000  | 3.049978000  |
| H | 3.962599000   | 0.475962000  | 2.754781000  |
| C | -5.962325000  | -3.103469000 | 0.339677000  |
| C | 5.947499000   | 3.146064000  | -0.279861000 |
| H | -7.004007000  | -2.805070000 | 0.367597000  |
| H | 6.990570000   | 2.850669000  | -0.285829000 |
| C | -5.620526000  | -4.442309000 | 0.329769000  |
| C | 5.602181000   | 4.483638000  | -0.282832000 |
| H | -6.381501000  | -5.213035000 | 0.360595000  |
| H | 6.361277000   | 5.256801000  | -0.301937000 |
| C | -4.261966000  | -4.785053000 | 0.244173000  |
| C | 4.240837000   | 4.822543000  | -0.223788000 |
| C | -3.312152000  | -3.753697000 | 0.210500000  |
| C | 3.295164000   | 3.790009000  | -0.204253000 |
| H | -2.265560000  | -3.984234000 | 0.090948000  |
| H | 2.246028000   | 4.018798000  | -0.104654000 |
| C | -3.720350000  | -2.417306000 | 0.282170000  |
| C | 3.706890000   | 2.451358000  | -0.263257000 |
| C | -2.828023000  | -1.239950000 | 0.230726000  |

|   |              |              |              |
|---|--------------|--------------|--------------|
| C | 2.819484000  | 1.272946000  | -0.227358000 |
| C | -3.531132000 | -0.028871000 | 0.006330000  |
| C | 3.532115000  | 0.066989000  | -0.003942000 |
| C | -2.860343000 | 1.198425000  | -0.227312000 |
| C | 2.853343000  | -1.158997000 | 0.216114000  |
| C | -3.778369000 | 2.356345000  | -0.266322000 |
| C | 3.772721000  | -2.312037000 | 0.267888000  |
| C | -3.412517000 | 3.697787000  | -0.215491000 |
| C | 3.412954000  | -3.656853000 | 0.202815000  |
| H | -2.377418000 | 3.994690000  | -0.127630000 |
| H | 2.380381000  | -3.955678000 | 0.091497000  |
| C | -4.386904000 | 4.711337000  | -0.234172000 |
| C | 4.387592000  | -4.666577000 | 0.235437000  |
| C | -5.736618000 | 4.341677000  | -0.287024000 |
| C | 5.735370000  | -4.293110000 | 0.317319000  |
| H | -6.541660000 | 5.063666000  | -0.308894000 |
| H | 6.541968000  | -5.013195000 | 0.350474000  |
| C | -6.038083000 | 2.985518000  | -0.279534000 |
| C | 6.032920000  | -2.936322000 | 0.323332000  |
| H | -7.073506000 | 2.664144000  | -0.282696000 |
| H | 7.067332000  | -2.612286000 | 0.348934000  |
| C | -1.457360000 | 1.190446000  | -0.393334000 |
| C | 1.448723000  | -1.156614000 | 0.372458000  |
| C | -0.719393000 | 0.005871000  | -0.007320000 |
| C | 0.708673000  | 0.026080000  | -0.008886000 |
| C | -1.424009000 | -1.198266000 | 0.382812000  |
| C | 1.415072000  | 1.229509000  | -0.390292000 |
| C | -0.651211000 | -2.258887000 | 0.960084000  |
| C | 0.644195000  | 2.287180000  | -0.975941000 |
| H | -1.158740000 | -3.066941000 | 1.471880000  |
| H | 1.154401000  | 3.094103000  | -1.487133000 |
| C | 0.709531000  | -2.238342000 | 0.954486000  |
| C | -0.716849000 | 2.270246000  | -0.976008000 |
| H | 1.245186000  | -3.033172000 | 1.458187000  |
| H | -1.249878000 | 3.063138000  | -1.485257000 |
| O | -3.973408000 | -6.094291000 | 0.193033000  |
| O | 3.934119000  | -5.930854000 | 0.175104000  |
| O | 3.948777000  | 6.134229000  | -0.181745000 |
| O | -3.928577000 | 5.971456000  | -0.191012000 |
| C | -4.871171000 | 7.064800000  | -0.189666000 |
| C | -4.104109000 | 8.392986000  | -0.131063000 |
| C | -5.156850000 | 9.518929000  | -0.125376000 |
| C | -3.197888000 | 8.535412000  | -1.368592000 |
| C | -3.262078000 | 8.463449000  | 1.156949000  |
| C | 2.573780000  | 6.557503000  | -0.105302000 |
| C | 2.518476000  | 8.091996000  | -0.120409000 |
| C | 1.033450000  | 8.490925000  | -0.015584000 |
| C | 3.295889000  | 8.662726000  | 1.080788000  |
| C | 3.109562000  | 8.627602000  | -1.438332000 |
| C | -2.599696000 | -6.523317000 | 0.094867000  |
| C | -2.550782000 | -8.057832000 | 0.107086000  |

|   |              |               |              |
|---|--------------|---------------|--------------|
| C | -3.125056000 | -8.593090000  | 1.432548000  |
| C | -3.346933000 | -8.623810000  | -1.084029000 |
| C | -1.068599000 | -8.461434000  | -0.019443000 |
| C | 4.880923000  | -7.018287000  | 0.183508000  |
| C | 4.121977000  | -8.349940000  | 0.097797000  |
| C | 3.305483000  | -8.412308000  | -1.206979000 |
| C | 3.191868000  | -8.507735000  | 1.315602000  |
| C | 5.179256000  | -9.471505000  | 0.102618000  |
| H | -5.531730000 | 6.960572000   | 0.680182000  |
| H | -5.477400000 | 7.010390000   | -1.102544000 |
| H | -5.819162000 | 9.443282000   | 0.745455000  |
| H | -5.777363000 | 9.492447000   | -1.029256000 |
| H | -4.663091000 | 10.496289000  | -0.086768000 |
| H | -3.785168000 | 8.498395000   | -2.294527000 |
| H | -2.449916000 | 7.736678000   | -1.408910000 |
| H | -2.668593000 | 9.494881000   | -1.344650000 |
| H | -3.895813000 | 8.377992000   | 2.048372000  |
| H | -2.731666000 | 9.420956000   | 1.212680000  |
| H | -2.517824000 | 7.661114000   | 1.191302000  |
| H | 2.024844000  | 6.145467000   | -0.961746000 |
| H | 2.131216000  | 6.164439000   | 0.819078000  |
| H | 0.933984000  | 9.582144000   | -0.026769000 |
| H | 0.583810000  | 8.123451000   | 0.914998000  |
| H | 0.450449000  | 8.093798000   | -0.855510000 |
| H | 2.881691000  | 8.298203000   | 2.028967000  |
| H | 3.236864000  | 9.757205000   | 1.086863000  |
| H | 4.352616000  | 8.379812000   | 1.040456000  |
| H | 2.557154000  | 8.242316000   | -2.304445000 |
| H | 4.159519000  | 8.337867000   | -1.548754000 |
| H | 3.054571000  | 9.721903000   | -1.464401000 |
| H | -2.037681000 | -6.114288000  | 0.943921000  |
| H | -2.171148000 | -6.130291000  | -0.835796000 |
| H | -2.559750000 | -8.210296000  | 2.291367000  |
| H | -3.072569000 | -9.687516000  | 1.456503000  |
| H | -4.172734000 | -8.301074000  | 1.557859000  |
| H | -4.402058000 | -8.337321000  | -1.028926000 |
| H | -3.292002000 | -9.718454000  | -1.092072000 |
| H | -2.944282000 | -8.259713000  | -2.037301000 |
| H | -0.472528000 | -8.067884000  | 0.812922000  |
| H | -0.631029000 | -8.093808000  | -0.955671000 |
| H | -0.973147000 | -9.552996000  | -0.011621000 |
| H | 5.469239000  | -6.970534000  | 1.108703000  |
| H | 5.559413000  | -6.905057000  | -0.671564000 |
| H | 2.780158000  | -9.371368000  | -1.281927000 |
| H | 3.956096000  | -8.316060000  | -2.085069000 |
| H | 2.558999000  | -7.612437000  | -1.248377000 |
| H | 2.439666000  | -7.712618000  | 1.347818000  |
| H | 3.760320000  | -8.476142000  | 2.253441000  |
| H | 2.667659000  | -9.469381000  | 1.272816000  |
| H | 5.858537000  | -9.384907000  | -0.754050000 |
| H | 4.690875000  | -10.450688000 | 0.045204000  |

|   |               |              |              |
|---|---------------|--------------|--------------|
| H | 5.781720000   | -9.450716000 | 1.018792000  |
| H | -4.584180000  | 0.741547000  | 5.122471000  |
| H | -7.025597000  | 0.813560000  | 5.739291000  |
| H | -3.965363000  | 0.374996000  | 2.743060000  |
| H | -10.191436000 | -0.440742000 | -1.985036000 |
| H | -11.381877000 | -0.133236000 | 0.168265000  |
| H | -7.264928000  | -0.947851000 | -5.597972000 |
| H | -4.800109000  | -0.821651000 | -5.094279000 |
| H | -4.080139000  | -0.443364000 | -2.744898000 |
| H | 7.236867000   | -0.721342000 | -5.634001000 |
| H | 8.852454000   | -0.422003000 | -3.770988000 |
| H | 11.367710000  | 0.204885000  | 0.106692000  |
| H | 10.096205000  | 0.501221000  | 2.214528000  |
| H | 8.720352000   | 0.734284000  | 3.907116000  |
| H | 7.042985000   | 0.979113000  | 5.723063000  |

Cartesian coordinates of DFT-optimized structure of **8box** complex by B3LYP/Def2-TZVP; 6-31G(d,p)/CH<sub>3</sub>CN, charge = 3, multiplicity = 2

|    |              |              |              |
|----|--------------|--------------|--------------|
| Ru | 4.933161000  | -0.356676000 | -0.207831000 |
| N  | 5.455098000  | 0.154196000  | 1.767323000  |
| N  | 7.004172000  | -0.456924000 | -0.238097000 |
| N  | 5.345524000  | -0.912751000 | -2.196645000 |
| C  | 4.598454000  | 0.459028000  | 2.760449000  |
| H  | 3.546418000  | 0.431623000  | 2.505307000  |
| C  | 5.021639000  | 0.790699000  | 4.043648000  |
| H  | 4.285523000  | 1.027852000  | 4.803377000  |
| C  | 6.387284000  | 0.808751000  | 4.318352000  |
| H  | 6.753441000  | 1.063068000  | 5.307309000  |
| C  | 7.281995000  | 0.492916000  | 3.299034000  |
| H  | 8.348603000  | 0.499053000  | 3.488969000  |
| C  | 6.802415000  | 0.167975000  | 2.029460000  |
| C  | 7.682322000  | -0.179237000 | 0.893914000  |
| C  | 9.078591000  | -0.239325000 | 0.901490000  |
| H  | 9.645395000  | -0.021506000 | 1.798573000  |
| C  | 9.737783000  | -0.589296000 | -0.278028000 |
| C  | 9.013775000  | -0.872286000 | -1.437340000 |
| H  | 9.530501000  | -1.142581000 | -2.350249000 |
| C  | 7.619048000  | -0.797219000 | -1.388997000 |
| C  | 6.676997000  | -1.056201000 | -2.497930000 |
| C  | 7.085743000  | -1.424099000 | -3.780499000 |
| H  | 8.140781000  | -1.532929000 | -4.001446000 |
| C  | 6.135380000  | -1.650582000 | -4.772861000 |
| H  | 6.446279000  | -1.937638000 | -5.771723000 |
| C  | 4.786453000  | -1.501131000 | -4.458486000 |
| H  | 4.009043000  | -1.664989000 | -5.196105000 |
| C  | 4.434861000  | -1.131997000 | -3.163953000 |
| H  | 3.398276000  | -1.003484000 | -2.878294000 |
| C  | -3.308983000 | 1.213845000  | -0.417853000 |
| C  | 2.234282000  | -1.397335000 | 0.163484000  |

|    |               |              |              |
|----|---------------|--------------|--------------|
| C  | -4.065537000  | 0.079221000  | -0.074886000 |
| C  | 2.990819000   | -0.262663000 | -0.179368000 |
| C  | -3.412413000  | -1.123748000 | 0.247087000  |
| C  | 2.337673000   | 0.940264000  | -0.501457000 |
| C  | -2.015589000  | -1.193349000 | 0.360143000  |
| C  | 0.940858000   | 1.009785000  | -0.614679000 |
| C  | -1.249128000  | -0.057307000 | -0.116748000 |
| C  | 0.174401000   | -0.126277000 | -0.137823000 |
| C  | -1.915944000  | 1.148197000  | -0.572383000 |
| C  | 0.841222000   | -1.331763000 | 0.317849000  |
| C  | -1.123886000  | 2.166365000  | -1.196883000 |
| C  | 0.049156000   | -2.349976000 | 0.942269000  |
| H  | -1.611359000  | 2.973664000  | -1.727221000 |
| H  | 0.536621000   | -3.157310000 | 1.472561000  |
| C  | 0.232820000   | 2.100633000  | -1.216969000 |
| C  | -1.307551000  | -2.284243000 | 0.962354000  |
| H  | 0.780163000   | 2.857796000  | -1.762625000 |
| H  | -1.854892000  | -3.041441000 | 1.507963000  |
| H  | 10.821044000  | -0.641755000 | -0.293852000 |
| N  | -4.338747000  | -2.180965000 | 0.467242000  |
| N  | -5.677740000  | -1.829793000 | 0.458424000  |
| C  | -6.365350000  | -2.962957000 | 0.595805000  |
| C  | -5.495536000  | -4.065773000 | 0.675919000  |
| C  | -4.224988000  | -3.537914000 | 0.576688000  |
| H  | -7.445321000  | -2.935326000 | 0.618469000  |
| H  | -5.759118000  | -5.107067000 | 0.781447000  |
| H  | -3.269843000  | -4.032654000 | 0.543901000  |
| Ru | -6.007865000  | 0.173426000  | -0.045776000 |
| C  | -5.859251000  | 1.317933000  | 4.204804000  |
| C  | -5.508238000  | 0.948743000  | 2.910130000  |
| N  | -6.419327000  | 0.729533000  | 1.943215000  |
| C  | -7.750661000  | 0.873078000  | 2.245066000  |
| C  | -8.158835000  | 1.241038000  | 3.527799000  |
| C  | -7.208035000  | 1.467482000  | 4.519752000  |
| C  | -8.693205000  | 0.614141000  | 1.136545000  |
| N  | -8.078845000  | 0.273844000  | -0.014631000 |
| C  | -8.757502000  | -0.003800000 | -1.146350000 |
| C  | -10.153773000 | 0.056324000  | -1.153305000 |
| C  | -10.812436000 | 0.406291000  | 0.026509000  |
| C  | -10.087909000 | 0.689242000  | 1.185507000  |
| C  | -7.878102000  | -0.351014000 | -2.282290000 |
| N  | -6.530672000  | -0.337340000 | -2.020725000 |
| C  | -5.674472000  | -0.642174000 | -3.014234000 |
| C  | -6.098226000  | -0.973742000 | -4.297272000 |
| C  | -7.463988000  | -0.991684000 | -4.571396000 |
| C  | -8.358245000  | -0.675846000 | -3.551682000 |
| H  | -4.471784000  | 0.820163000  | 2.624024000  |
| H  | -5.081516000  | 1.481759000  | 4.942086000  |
| H  | -7.518490000  | 1.754587000  | 5.518738000  |
| H  | -9.213771000  | 1.349952000  | 3.749186000  |
| H  | -10.604227000 | 0.959526000  | 2.098652000  |

|   |               |              |              |
|---|---------------|--------------|--------------|
| H | -11.895688000 | 0.458773000  | 0.042813000  |
| H | -10.720978000 | -0.161473000 | -2.050139000 |
| H | -9.424934000  | -0.681891000 | -3.741170000 |
| H | -7.830581000  | -1.245915000 | -5.560215000 |
| H | -5.362450000  | -1.210899000 | -5.057329000 |
| H | -4.622325000  | -0.614846000 | -2.759546000 |
| N | -4.134853000  | 2.356023000  | -0.611873000 |
| N | -5.500677000  | 2.136018000  | -0.562555000 |
| C | -6.079242000  | 3.330565000  | -0.681114000 |
| C | -5.109611000  | 4.344174000  | -0.788858000 |
| C | -3.893690000  | 3.695751000  | -0.726767000 |
| H | -2.894621000  | 4.095742000  | -0.723268000 |
| H | -5.274261000  | 5.406223000  | -0.888088000 |
| H | -7.157015000  | 3.407566000  | -0.671492000 |
| N | 3.060196000   | -2.539448000 | 0.357686000  |
| C | 2.819105000   | -3.879201000 | 0.472433000  |
| C | 4.035062000   | -4.527529000 | 0.534832000  |
| C | 5.004642000   | -3.513834000 | 0.427429000  |
| N | 4.426013000   | -2.319325000 | 0.308779000  |
| N | 3.263975000   | 1.997549000  | -0.721426000 |
| N | 4.602997000   | 1.646494000  | -0.712195000 |
| C | 5.290551000   | 2.779703000  | -0.849479000 |
| C | 4.420667000   | 3.882438000  | -0.929934000 |
| C | 3.150137000   | 3.354481000  | -0.831017000 |
| H | 1.820066000   | -4.279264000 | 0.468618000  |
| H | 4.199771000   | -5.589570000 | 0.634043000  |
| H | 6.082424000   | -3.590746000 | 0.418115000  |
| H | 2.194945000   | 3.849152000  | -0.798545000 |
| H | 4.684191000   | 4.923745000  | -1.035478000 |
| H | 6.370531000   | 2.752160000  | -0.871831000 |

Cartesian coordinates of DFT-optimized structure of **9box** complex by B3LYP/Def2-TZVP;  
6-31G(d,p)/CH<sub>3</sub>CN, charge = 3, multiplicity = 2

|    |             |              |              |
|----|-------------|--------------|--------------|
| Ru | 4.930937000 | -0.193225000 | 0.004791000  |
| N  | 4.479142000 | -2.232709000 | 0.314151000  |
| N  | 5.443253000 | 0.111303000  | 2.023320000  |
| N  | 7.030764000 | -0.262614000 | -0.001237000 |
| N  | 5.408923000 | -0.547795000 | -2.013707000 |
| C  | 4.559642000 | 0.298238000  | 3.022954000  |
| H  | 3.513627000 | 0.283601000  | 2.744293000  |
| C  | 4.953238000 | 0.499482000  | 4.341943000  |
| H  | 4.198314000 | 0.644799000  | 5.106136000  |
| C  | 6.312598000 | 0.508023000  | 4.645977000  |
| H  | 6.654614000 | 0.661358000  | 5.663868000  |
| C  | 7.233019000 | 0.315626000  | 3.618771000  |
| H  | 8.295421000 | 0.319026000  | 3.830636000  |
| C  | 6.784286000 | 0.118484000  | 2.312732000  |
| C  | 7.688020000 | -0.093850000 | 1.163522000  |
| C  | 9.084789000 | -0.132214000 | 1.188064000  |

|   |              |              |              |
|---|--------------|--------------|--------------|
| H | 9.634802000  | 0.000748000  | 2.111658000  |
| C | 9.766356000  | -0.347213000 | -0.010978000 |
| C | 9.064413000  | -0.520229000 | -1.204946000 |
| H | 9.598215000  | -0.688101000 | -2.132415000 |
| C | 7.668068000  | -0.472408000 | -1.170230000 |
| C | 6.745074000  | -0.634663000 | -2.312011000 |
| C | 7.172721000  | -0.865758000 | -3.619602000 |
| H | 8.231755000  | -0.930992000 | -3.838010000 |
| C | 6.235786000  | -1.012338000 | -4.639348000 |
| H | 6.561299000  | -1.191676000 | -5.658406000 |
| C | 4.881293000  | -0.925083000 | -4.325999000 |
| H | 4.113849000  | -1.033258000 | -5.083874000 |
| C | 4.509154000  | -0.692736000 | -3.005898000 |
| H | 3.467771000  | -0.617231000 | -2.720057000 |
| C | 5.359438000  | -3.251147000 | 0.353320000  |
| H | 6.407662000  | -2.975523000 | 0.367069000  |
| C | 4.986722000  | -4.581426000 | 0.367773000  |
| H | 5.729846000  | -5.369150000 | 0.401752000  |
| C | 3.619596000  | -4.893714000 | 0.302783000  |
| C | 2.692142000  | -3.841575000 | 0.267653000  |
| H | 1.638651000  | -4.049573000 | 0.167993000  |
| C | 3.132412000  | -2.514583000 | 0.312142000  |
| C | -3.317521000 | 1.265241000  | -0.316524000 |
| C | 2.267738000  | -1.316980000 | 0.253138000  |
| C | -4.064870000 | 0.123500000  | 0.003654000  |
| C | 2.992192000  | -0.125838000 | 0.003777000  |
| C | -3.399723000 | -1.068010000 | 0.323967000  |
| C | 2.353170000  | 1.112323000  | -0.246569000 |
| C | -1.998995000 | -1.125453000 | 0.451162000  |
| C | 0.948881000  | 1.132551000  | -0.411515000 |
| C | -1.241600000 | 0.023461000  | 0.003862000  |
| C | 0.187149000  | -0.027492000 | 0.003384000  |
| C | -1.916006000 | 1.223418000  | -0.442891000 |
| C | 0.865314000  | -1.238319000 | 0.418742000  |
| C | -1.124084000 | 2.257928000  | -1.035687000 |
| C | 0.077365000  | -2.267698000 | 1.028059000  |
| H | -1.609609000 | 3.065932000  | -1.567011000 |
| H | 0.573085000  | -3.078368000 | 1.546668000  |
| C | 0.236115000  | 2.217357000  | -1.016655000 |
| C | -1.282382000 | -2.211956000 | 1.046845000  |
| H | 0.788769000  | 2.993724000  | -1.529846000 |
| H | -1.823973000 | -2.980916000 | 1.582176000  |
| O | 3.301416000  | -6.195887000 | 0.271602000  |
| C | 1.917487000  | -6.596103000 | 0.192336000  |
| C | 1.838446000  | -8.129306000 | 0.194250000  |
| C | 0.346186000  | -8.503193000 | 0.099422000  |
| C | 2.595630000  | -8.700789000 | -1.019536000 |
| C | 2.432219000  | -8.687153000 | 1.501694000  |
| H | 1.377676000  | -6.180750000 | 1.052757000  |
| H | 1.482562000  | -6.188444000 | -0.728893000 |
| H | 0.230422000  | -9.592729000 | 0.101339000  |

|    |               |              |              |
|----|---------------|--------------|--------------|
| H  | -0.105415000  | -8.120006000 | -0.823699000 |
| H  | -0.222225000  | -8.104327000 | 0.948385000  |
| H  | 2.183935000   | -8.314713000 | -1.960270000 |
| H  | 2.511847000   | -9.793443000 | -1.039518000 |
| H  | 3.658906000   | -8.442979000 | -0.982589000 |
| H  | 1.894452000   | -8.300364000 | 2.376244000  |
| H  | 3.488234000   | -8.417719000 | 1.605034000  |
| H  | 2.357230000   | -9.780460000 | 1.517677000  |
| H  | 10.850411000  | -0.380572000 | -0.014806000 |
| N  | -4.316262000  | -2.139331000 | 0.525992000  |
| N  | -5.660481000  | -1.804730000 | 0.500519000  |
| C  | -6.334569000  | -2.947656000 | 0.628089000  |
| C  | -5.452042000  | -4.039556000 | 0.717359000  |
| C  | -4.186964000  | -3.495067000 | 0.635857000  |
| H  | -7.414960000  | -2.933259000 | 0.635672000  |
| H  | -5.703257000  | -5.084613000 | 0.816857000  |
| H  | -3.225991000  | -3.978715000 | 0.614688000  |
| Ru | -6.026190000  | 0.191339000  | 0.000549000  |
| C  | -5.949459000  | 1.343432000  | 4.256522000  |
| C  | -5.570133000  | 0.976237000  | 2.969382000  |
| N  | -6.457481000  | 0.740446000  | 1.984034000  |
| C  | -7.797352000  | 0.868003000  | 2.262129000  |
| C  | -8.234393000  | 1.234509000  | 3.536564000  |
| C  | -7.306396000  | 1.475422000  | 4.546186000  |
| C  | -8.717646000  | 0.594970000  | 1.138566000  |
| N  | -8.077689000  | 0.262019000  | -0.003491000 |
| C  | -8.735271000  | -0.025940000 | -1.147644000 |
| C  | -10.132010000 | 0.015187000  | -1.176627000 |
| C  | -10.815715000 | 0.356455000  | -0.008086000 |
| C  | -10.113981000 | 0.650198000  | 1.162716000  |
| C  | -7.831868000  | -0.359975000 | -2.268309000 |
| N  | -6.487527000  | -0.325619000 | -1.985021000 |
| C  | -5.614859000  | -0.617748000 | -2.968405000 |
| C  | -6.013762000  | -0.953621000 | -4.258167000 |
| C  | -7.375470000  | -0.991763000 | -4.552862000 |
| C  | -8.288422000  | -0.691338000 | -3.545501000 |
| H  | -4.526731000  | 0.863439000  | 2.700844000  |
| H  | -5.188202000  | 1.520373000  | 5.008118000  |
| H  | -7.639661000  | 1.760536000  | 5.538529000  |
| H  | -9.294826000  | 1.330966000  | 3.737310000  |
| H  | -10.649794000 | 0.913621000  | 2.066828000  |
| H  | -11.899791000 | 0.393630000  | -0.009805000 |
| H  | -10.681773000 | -0.211173000 | -2.082455000 |
| H  | -9.352197000  | -0.713916000 | -3.750073000 |
| H  | -7.723802000  | -1.249766000 | -5.547443000 |
| H  | -5.263650000  | -1.178992000 | -5.008000000 |
| H  | -4.567112000  | -0.576604000 | -2.696365000 |
| N  | -4.157123000  | 2.397844000  | -0.520774000 |
| N  | -5.521521000  | 2.157313000  | -0.497764000 |
| C  | -6.114340000  | 3.344107000  | -0.629094000 |
| C  | -5.157886000  | 4.371846000  | -0.718580000 |

|   |              |              |              |
|---|--------------|--------------|--------------|
| C | -3.933806000 | 3.741045000  | -0.633163000 |
| C | 3.296426000  | 2.249155000  | -0.305010000 |
| N | 4.628331000  | 1.876469000  | -0.304455000 |
| C | 5.569190000  | 2.830202000  | -0.341723000 |
| C | 5.296082000  | 4.192567000  | -0.357125000 |
| C | 3.954792000  | 4.590113000  | -0.294253000 |
| C | 2.959065000  | 3.597232000  | -0.261397000 |
| O | 3.521758000  | 5.858110000  | -0.253765000 |
| C | 4.481767000  | 6.936359000  | -0.266978000 |
| C | 3.734719000  | 8.274937000  | -0.187447000 |
| C | 4.802533000  | 9.386509000  | -0.204978000 |
| C | 2.924710000  | 8.352675000  | 1.120592000  |
| C | 2.799917000  | 8.432757000  | -1.401598000 |
| H | 5.068847000  | 6.875654000  | -1.191930000 |
| H | 5.157554000  | 6.818641000  | 0.589295000  |
| H | 5.400673000  | 9.353793000  | -1.123752000 |
| H | 5.485285000  | 9.301105000  | 0.649171000  |
| H | 4.323113000  | 10.370425000 | -0.152768000 |
| H | 3.577088000  | 8.248409000  | 1.996382000  |
| H | 2.166372000  | 7.564395000  | 1.166016000  |
| H | 2.414405000  | 9.319744000  | 1.194998000  |
| H | 3.362874000  | 8.389799000  | -2.342149000 |
| H | 2.284704000  | 9.399326000  | -1.362104000 |
| H | 2.040758000  | 7.644270000  | -1.423509000 |
| H | 6.115380000  | 4.898056000  | -0.392839000 |
| H | 6.597035000  | 2.485545000  | -0.351225000 |
| H | 1.931035000  | 3.916696000  | -0.168016000 |
| H | -2.941591000 | 4.156907000  | -0.610931000 |
| H | -5.335661000 | 5.431640000  | -0.820582000 |
| H | -7.193154000 | 3.405197000  | -0.640121000 |

Cartesian coordinates of DFT-optimized structure of **10box** complex by B3LYP/Def2-TZVP;  
6-31G(d,p)/CH<sub>3</sub>CN, charge = 3, multiplicity = 2

|    |             |              |              |
|----|-------------|--------------|--------------|
| Ru | 5.410683000 | 0.838151000  | -0.025072000 |
| N  | 5.345468000 | -1.242360000 | 0.297304000  |
| N  | 5.776024000 | 1.259457000  | 2.004861000  |
| N  | 7.451902000 | 1.211724000  | 0.010534000  |
| N  | 5.972178000 | 0.565598000  | -2.034235000 |
| C  | 4.861387000 | 1.251379000  | 2.993613000  |
| H  | 3.849449000 | 1.000969000  | 2.700591000  |
| C  | 5.179815000 | 1.542529000  | 4.316195000  |
| H  | 4.400443000 | 1.521071000  | 5.069546000  |
| C  | 6.498880000 | 1.855121000  | 4.638216000  |
| H  | 6.783458000 | 2.087604000  | 5.658935000  |
| C  | 7.453655000 | 1.862609000  | 3.624763000  |
| H  | 8.486537000 | 2.099067000  | 3.850542000  |
| C  | 7.079201000 | 1.562197000  | 2.314433000  |
| C  | 8.030190000 | 1.543342000  | 1.183600000  |
| C  | 9.398306000 | 1.825499000  | 1.230511000  |

|   |              |              |              |
|---|--------------|--------------|--------------|
| H | 9.885230000  | 2.092815000  | 2.160671000  |
| C | 10.134740000 | 1.757749000  | 0.046472000  |
| C | 9.513462000  | 1.416401000  | -1.156214000 |
| H | 10.089565000 | 1.367718000  | -2.072375000 |
| C | 8.142884000  | 1.143444000  | -1.146379000 |
| C | 7.303262000  | 0.768970000  | -2.303289000 |
| C | 7.803442000  | 0.622569000  | -3.598061000 |
| H | 8.856310000  | 0.788269000  | -3.792422000 |
| C | 6.947271000  | 0.262771000  | -4.635661000 |
| H | 7.329386000  | 0.147251000  | -5.644347000 |
| C | 5.598631000  | 0.055427000  | -4.353057000 |
| H | 4.892543000  | -0.226341000 | -5.125999000 |
| C | 5.153196000  | 0.216653000  | -3.045113000 |
| H | 4.113212000  | 0.067360000  | -2.782774000 |
| C | 6.409956000  | -2.067021000 | 0.358753000  |
| H | 7.381415000  | -1.586759000 | 0.386796000  |
| C | 6.310609000  | -3.444556000 | 0.374959000  |
| H | 7.195535000  | -4.067917000 | 0.424173000  |
| C | 5.034436000  | -4.023905000 | 0.289505000  |
| C | 3.917510000  | -3.178935000 | 0.237321000  |
| H | 2.929580000  | -3.595385000 | 0.121997000  |
| C | 4.080377000  | -1.788923000 | 0.279526000  |
| C | -2.995636000 | 0.788548000  | -0.205442000 |
| C | 2.995742000  | -0.787298000 | 0.204425000  |
| C | -3.496001000 | -0.511953000 | 0.041805000  |
| C | 3.496109000  | 0.513209000  | -0.042730000 |
| C | -2.614888000 | -1.587796000 | 0.280895000  |
| C | 2.614996000  | 1.589057000  | -0.281779000 |
| C | -1.232813000 | -1.387869000 | 0.415463000  |
| C | 1.232931000  | 1.389120000  | -0.416420000 |
| C | -0.705613000 | -0.100743000 | 0.011448000  |
| C | 0.705727000  | 0.101987000  | -0.012439000 |
| C | -1.603307000 | 0.974803000  | -0.364410000 |
| C | 1.603419000  | -0.973565000 | 0.363391000  |
| C | -1.020556000 | 2.147809000  | -0.947246000 |
| C | 1.020680000  | -2.146585000 | 0.946205000  |
| H | -1.661088000 | 2.866744000  | -1.441051000 |
| H | 1.661223000  | -2.865538000 | 1.439970000  |
| C | 0.324389000  | 2.348984000  | -0.968035000 |
| C | -0.324266000 | -2.347749000 | 0.967039000  |
| H | 0.712592000  | 3.221827000  | -1.477134000 |
| H | -0.712468000 | -3.220603000 | 1.476125000  |
| O | 4.983807000  | -5.365203000 | 0.255380000  |
| C | 3.708848000  | -6.031948000 | 0.160904000  |
| C | 3.936441000  | -7.550132000 | 0.139253000  |
| C | 2.547965000  | -8.212031000 | 0.039081000  |
| C | 4.788137000  | -7.939792000 | -1.083819000 |
| C | 4.633632000  | -7.998989000 | 1.437455000  |
| H | 3.093515000  | -5.746477000 | 1.023842000  |
| H | 3.203477000  | -5.706089000 | -0.757058000 |
| H | 2.650596000  | -9.302779000 | 0.019763000  |

|    |              |              |              |
|----|--------------|--------------|--------------|
| H  | 2.023453000  | -7.908563000 | -0.875209000 |
| H  | 1.916518000  | -7.950504000 | 0.896944000  |
| H  | 4.300970000  | -7.634584000 | -2.018260000 |
| H  | 4.930252000  | -9.026011000 | -1.118332000 |
| H  | 5.775781000  | -7.469133000 | -1.045906000 |
| H  | 4.033746000  | -7.737867000 | 2.318040000  |
| H  | 5.616477000  | -7.528729000 | 1.543937000  |
| H  | 4.775486000  | -9.085817000 | 1.437731000  |
| H  | 11.197679000 | 1.973279000  | 0.060737000  |
| N  | 3.297137000  | 2.829692000  | -0.394305000 |
| C  | 2.897607000  | 4.137395000  | -0.401384000 |
| C  | 4.027881000  | 4.926873000  | -0.422840000 |
| C  | 5.111537000  | 4.028248000  | -0.403314000 |
| N  | 4.678209000  | 2.769066000  | -0.373432000 |
| N  | -3.297034000 | -2.828414000 | 0.393573000  |
| N  | -4.678107000 | -2.767779000 | 0.372775000  |
| C  | -5.111437000 | -4.026957000 | 0.402792000  |
| C  | -4.027785000 | -4.925587000 | 0.422359000  |
| C  | -2.897507000 | -4.136118000 | 0.400785000  |
| C  | -4.080284000 | 1.790164000  | -0.280606000 |
| C  | -3.917432000 | 3.180183000  | -0.238512000 |
| C  | -5.034366000 | 4.025138000  | -0.290777000 |
| C  | -6.310533000 | 3.445771000  | -0.376189000 |
| C  | -6.409868000 | 2.068236000  | -0.359860000 |
| N  | -5.345372000 | 1.243589000  | -0.298341000 |
| O  | -4.983746000 | 5.366437000  | -0.256773000 |
| C  | -3.708791000 | 6.033196000  | -0.162346000 |
| C  | -3.936389000 | 7.551382000  | -0.140843000 |
| C  | -2.547918000 | 8.213295000  | -0.040708000 |
| C  | -4.633557000 | 8.000112000  | -1.439101000 |
| C  | -4.788109000 | 7.941156000  | 1.082175000  |
| H  | -6.173044000 | -4.228796000 | 0.396870000  |
| H  | -4.066149000 | -6.004091000 | 0.438919000  |
| H  | -1.858335000 | -4.412878000 | 0.357632000  |
| H  | -2.929508000 | 3.596653000  | -0.123217000 |
| H  | -7.195464000 | 4.069119000  | -0.425458000 |
| H  | -7.381323000 | 1.587963000  | -0.387854000 |
| H  | -3.093446000 | 5.747645000  | -1.025249000 |
| H  | -3.203430000 | 5.707426000  | 0.755653000  |
| H  | -2.023422000 | 7.909918000  | 0.873622000  |
| H  | -2.650552000 | 9.304044000  | -0.021499000 |
| H  | -1.916452000 | 7.951685000  | -0.898533000 |
| H  | -4.033656000 | 7.738905000  | -2.319650000 |
| H  | -4.775411000 | 9.086940000  | -1.439485000 |
| H  | -5.616400000 | 7.529841000  | -1.545555000 |
| H  | -4.300957000 | 7.636040000  | 2.016655000  |
| H  | -5.775750000 | 7.470487000  | 1.044290000  |
| H  | -4.930230000 | 9.027377000  | 1.116580000  |
| Ru | -5.410571000 | -0.836888000 | 0.024250000  |
| C  | -5.598343000 | -0.053692000 | 4.352153000  |
| C  | -5.152966000 | -0.215063000 | 3.044207000  |

|   |               |              |              |
|---|---------------|--------------|--------------|
| N | -5.971995000  | -0.564124000 | 2.033406000  |
| C | -7.303067000  | -0.767466000 | 2.302540000  |
| C | -7.803188000  | -0.620923000 | 3.597318000  |
| C | -6.946970000  | -0.261006000 | 4.634840000  |
| C | -8.142737000  | -1.142062000 | 1.145707000  |
| N | -7.451808000  | -1.210461000 | -0.011228000 |
| C | -8.030147000  | -1.542196000 | -1.184232000 |
| C | -9.398266000  | -1.824358000 | -1.231054000 |
| C | -10.134647000 | -1.756484000 | -0.046990000 |
| C | -9.513315000  | -1.415015000 | 1.155634000  |
| C | -7.079211000  | -1.561171000 | -2.315106000 |
| N | -5.776021000  | -1.258402000 | -2.005622000 |
| C | -4.861424000  | -1.250430000 | -2.994412000 |
| C | -5.179910000  | -1.541721000 | -4.316950000 |
| C | -6.498989000  | -1.854344000 | -4.638880000 |
| C | -7.453722000  | -1.861720000 | -3.625386000 |
| H | -4.112994000  | -0.065796000 | 2.781803000  |
| H | -4.892220000  | 0.228166000  | 5.125031000  |
| H | -7.329040000  | -0.145372000 | 5.643530000  |
| H | -8.856046000  | -0.786601000 | 3.791746000  |
| H | -10.089377000 | -1.366235000 | 2.071815000  |
| H | -11.197588000 | -1.972014000 | -0.061186000 |
| H | -9.885231000  | -2.091769000 | -2.161165000 |
| H | -8.486614000  | -2.098200000 | -3.851096000 |
| H | -6.783611000  | -2.086935000 | -5.659563000 |
| H | -4.400569000  | -1.520346000 | -5.070336000 |
| H | -3.849472000  | -0.999993000 | -2.701459000 |
| H | 4.066240000   | 6.005379000  | -0.439289000 |
| H | 1.858436000   | 4.414151000  | -0.358233000 |
| H | 6.173142000   | 4.230093000  | -0.397330000 |

Cartesian coordinates of DFT-optimized structure of **11box** complex by B3LYP/Def2-TZVP;  
6-31G(d,p)/CH<sub>3</sub>CN, charge = 3, multiplicity = 2

|    |              |              |              |
|----|--------------|--------------|--------------|
| Ru | 5.585845000  | -0.946404000 | 0.034714000  |
| N  | 5.145442000  | 1.089885000  | -0.269824000 |
| N  | 6.041458000  | -1.276529000 | -1.991963000 |
| N  | 7.652075000  | -0.948604000 | 0.029920000  |
| N  | 6.050131000  | -0.592822000 | 2.054799000  |
| N  | -5.055348000 | 0.810868000  | -0.265451000 |
| C  | 5.156032000  | -1.427222000 | -2.995953000 |
| H  | 4.111207000  | -1.370709000 | -2.716382000 |
| C  | 5.540854000  | -1.643615000 | -4.315112000 |
| H  | 4.781761000  | -1.758090000 | -5.080777000 |
| C  | 6.899621000  | -1.708136000 | -4.618291000 |
| H  | 7.236492000  | -1.874984000 | -5.635939000 |
| C  | 7.824756000  | -1.553676000 | -3.589349000 |
| H  | 8.886641000  | -1.598687000 | -3.800078000 |
| C  | 7.382821000  | -1.338687000 | -2.282648000 |
| C  | 8.298310000  | -1.163602000 | -1.135976000 |

|   |              |              |              |
|---|--------------|--------------|--------------|
| C | 9.695186000  | -1.204082000 | -1.160651000 |
| H | 10.235687000 | -1.376499000 | -2.083672000 |
| C | 10.390365000 | -1.019273000 | 0.035912000  |
| C | 9.700334000  | -0.799944000 | 1.229670000  |
| H | 10.245227000 | -0.659521000 | 2.155492000  |
| C | 8.303346000  | -0.768942000 | 1.199093000  |
| C | 7.392926000  | -0.555716000 | 2.343525000  |
| C | 7.840631000  | -0.326702000 | 3.645846000  |
| H | 8.903428000  | -0.299001000 | 3.854943000  |
| C | 6.920094000  | -0.131804000 | 4.672098000  |
| H | 7.261599000  | 0.046301000  | 5.686289000  |
| C | 5.560017000  | -0.168525000 | 4.370402000  |
| H | 4.804393000  | -0.020993000 | 5.133837000  |
| C | 5.169229000  | -0.400059000 | 3.055535000  |
| H | 4.123034000  | -0.435498000 | 2.777524000  |
| C | 6.045667000  | 2.091616000  | -0.326973000 |
| H | 7.087083000  | 1.791691000  | -0.354377000 |
| C | 5.702835000  | 3.429716000  | -0.340551000 |
| H | 6.462716000  | 4.200776000  | -0.388185000 |
| C | 4.344072000  | 3.772697000  | -0.255475000 |
| C | 3.395799000  | 2.742792000  | -0.201897000 |
| H | 2.349638000  | 2.975597000  | -0.083302000 |
| C | 3.803087000  | 1.403438000  | -0.250383000 |
| C | -2.684306000 | -2.346291000 | 0.265519000  |
| C | 2.913320000  | 0.225551000  | -0.184847000 |
| C | -3.424907000 | -1.168131000 | 0.038745000  |
| C | 3.637885000  | -0.968943000 | 0.038596000  |
| C | -2.773067000 | 0.067516000  | -0.186767000 |
| C | 2.959919000  | -2.183528000 | 0.263698000  |
| C | -3.725297000 | 1.196482000  | -0.248268000 |
| C | -3.401314000 | 2.548175000  | -0.198425000 |
| H | -2.377820000 | 2.876408000  | -0.089038000 |
| C | -4.403838000 | 3.532159000  | -0.246690000 |
| C | -5.740549000 | 3.122561000  | -0.328993000 |
| H | -6.565298000 | 3.821018000  | -0.376154000 |
| C | -6.002958000 | 1.758134000  | -0.316458000 |
| H | -7.027792000 | 1.404921000  | -0.338643000 |
| C | -1.366933000 | 0.089062000  | -0.331718000 |
| C | 1.567130000  | -2.231801000 | 0.412629000  |
| C | -0.609971000 | -1.088664000 | 0.041895000  |
| C | 0.815956000  | -1.047586000 | 0.042598000  |
| C | -1.291318000 | -2.313885000 | 0.414941000  |
| C | 1.505830000  | 0.169325000  | -0.328210000 |
| C | -0.509957000 | -3.390398000 | 0.950251000  |
| C | 0.719025000  | 1.225130000  | -0.894183000 |
| H | -1.005629000 | -4.225093000 | 1.429051000  |
| H | 1.216396000  | 2.045534000  | -1.395536000 |
| C | 0.848167000  | -3.350556000 | 0.949283000  |
| C | -0.641317000 | 1.188865000  | -0.894067000 |
| H | 1.391326000  | -4.156566000 | 1.425825000  |
| H | -1.184242000 | 1.981104000  | -1.393183000 |

|   |              |              |              |
|---|--------------|--------------|--------------|
| O | 4.055903000  | 5.084518000  | -0.223982000 |
| O | -3.981947000 | 4.804659000  | -0.200905000 |
| C | -4.950064000 | 5.874450000  | -0.238849000 |
| C | -4.214905000 | 7.219837000  | -0.161105000 |
| C | -5.290808000 | 8.322804000  | -0.205499000 |
| C | -3.262942000 | 7.373698000  | -1.362371000 |
| C | -3.425180000 | 7.316943000  | 1.158030000  |
| C | 2.682491000  | 5.513367000  | -0.139568000 |
| C | 2.633218000  | 7.047767000  | -0.161183000 |
| C | 1.149252000  | 7.452776000  | -0.062419000 |
| C | 3.409168000  | 7.620098000  | 1.040232000  |
| C | 3.229699000  | 7.576900000  | -1.479222000 |
| H | -5.638286000 | 5.759903000  | 0.608015000  |
| H | -5.522617000 | 5.800669000  | -1.171969000 |
| H | -5.985364000 | 8.240685000  | 0.639403000  |
| H | -5.875170000 | 8.276010000  | -1.132495000 |
| H | -4.819836000 | 9.310950000  | -0.156428000 |
| H | -3.810736000 | 7.316743000  | -2.311108000 |
| H | -2.496848000 | 6.591447000  | -1.364672000 |
| H | -2.756535000 | 8.344973000  | -1.324445000 |
| H | -4.089157000 | 7.213522000  | 2.025164000  |
| H | -2.925868000 | 8.289821000  | 1.231525000  |
| H | -2.659543000 | 6.536909000  | 1.221531000  |
| H | 2.126844000  | 5.098307000  | -0.990261000 |
| H | 2.244898000  | 5.127300000  | 0.789937000  |
| H | 1.054580000  | 8.544311000  | -0.077747000 |
| H | 0.695761000  | 7.090358000  | 0.868215000  |
| H | 0.567441000  | 7.054333000  | -0.902641000 |
| H | 2.994264000  | 7.256586000  | 1.988528000  |
| H | 3.349677000  | 8.714555000  | 1.045088000  |
| H | 4.466238000  | 7.338172000  | 1.001389000  |
| H | 2.679177000  | 7.189230000  | -2.345424000 |
| H | 4.279493000  | 7.285214000  | -1.585074000 |
| H | 3.176021000  | 8.671201000  | -1.509276000 |
| H | 11.474678000 | -1.047594000 | 0.038378000  |
| N | 3.854418000  | -3.286481000 | 0.358567000  |
| C | 3.695767000  | -4.643162000 | 0.332627000  |
| C | 4.949733000  | -5.219013000 | 0.348039000  |
| C | 5.854395000  | -4.141670000 | 0.359166000  |
| N | 5.202281000  | -2.978865000 | 0.352680000  |
| N | -3.514745000 | -3.497349000 | 0.356747000  |
| C | -3.279413000 | -4.842554000 | 0.327443000  |
| C | -4.498715000 | -5.488341000 | 0.337983000  |
| C | -5.462874000 | -4.464232000 | 0.349016000  |
| N | -4.876714000 | -3.266964000 | 0.347676000  |
| H | 6.934945000  | -4.149930000 | 0.358374000  |
| H | 5.179674000  | -6.273609000 | 0.341175000  |
| H | 2.723384000  | -5.100409000 | 0.271506000  |
| H | -2.282326000 | -5.243687000 | 0.269768000  |
| H | -4.668911000 | -6.554069000 | 0.329056000  |
| H | -6.541113000 | -4.535214000 | 0.347659000  |

|    |               |              |              |
|----|---------------|--------------|--------------|
| Ru | -5.363058000  | -1.252899000 | 0.030146000  |
| C  | -5.287482000  | -1.888637000 | -4.323209000 |
| C  | -4.918924000  | -1.662871000 | -3.000823000 |
| N  | -5.816082000  | -1.586309000 | -1.999179000 |
| C  | -7.148630000  | -1.734459000 | -2.291949000 |
| C  | -7.573489000  | -1.961709000 | -3.601306000 |
| C  | -6.637899000  | -2.041015000 | -4.629676000 |
| C  | -8.073274000  | -1.635158000 | -1.143966000 |
| C  | -9.463670000  | -1.774163000 | -1.170957000 |
| C  | -10.168927000 | -1.652139000 | 0.027375000  |
| C  | -9.496058000  | -1.396686000 | 1.223393000  |
| C  | -8.105054000  | -1.265519000 | 1.191823000  |
| N  | -7.444782000  | -1.386513000 | 0.022593000  |
| C  | -7.211994000  | -0.996572000 | 2.337821000  |
| N  | -5.871885000  | -0.937010000 | 2.047859000  |
| C  | -5.001691000  | -0.687248000 | 3.045038000  |
| C  | -5.405529000  | -0.489822000 | 4.361641000  |
| C  | -6.763632000  | -0.550471000 | 4.665869000  |
| C  | -7.671602000  | -0.805239000 | 3.641162000  |
| H  | -4.521143000  | -1.941647000 | -5.088145000 |
| H  | -3.880826000  | -1.538928000 | -2.719441000 |
| H  | -8.629576000  | -2.075117000 | -3.814409000 |
| H  | -6.961217000  | -2.217476000 | -5.649990000 |
| H  | -9.990460000  | -1.973739000 | -2.096286000 |
| H  | -11.248401000 | -1.757458000 | 0.029387000  |
| H  | -10.048785000 | -1.304966000 | 2.150533000  |
| H  | -3.956176000  | -0.648836000 | 2.766263000  |
| H  | -4.660041000  | -0.293287000 | 5.123735000  |
| H  | -7.114160000  | -0.401353000 | 5.681549000  |
| H  | -8.733023000  | -0.853378000 | 3.852284000  |

Cartesian coordinates of DFT-optimized structure of **12** complex by B3LYP/Def2-TZVP;  
6-31G(d,p)/CH<sub>3</sub>CN, charge = 2, multiplicity = 1

|    |              |              |              |
|----|--------------|--------------|--------------|
| Ru | -5.533455000 | -0.048539000 | 0.032201000  |
| Os | 5.539396000  | 0.094213000  | 0.001424000  |
| N  | -5.080682000 | -2.087615000 | 0.301356000  |
| N  | 5.069060000  | 2.134228000  | -0.256314000 |
| N  | -5.986330000 | 0.247223000  | 2.056049000  |
| N  | 6.001073000  | -0.195696000 | -2.021306000 |
| N  | -7.574028000 | -0.077861000 | 0.021893000  |
| N  | 7.583709000  | 0.122360000  | 0.011582000  |
| N  | -5.957314000 | -0.356465000 | -1.997991000 |
| N  | 5.972453000  | 0.395549000  | 2.030387000  |
| N  | -5.139508000 | 2.003216000  | -0.232282000 |
| N  | 5.127573000  | -1.958657000 | 0.255013000  |
| C  | -5.110341000 | 0.409945000  | 3.068163000  |
| C  | 5.124932000  | -0.355633000 | -3.041150000 |
| H  | 4.078585000  | -0.324433000 | -2.763439000 |
| C  | -5.504672000 | 0.604165000  | 4.387156000  |

|   |               |              |              |
|---|---------------|--------------|--------------|
| C | 5.522175000   | -0.547367000 | -4.356529000 |
| H | 4.769860000   | -0.669740000 | -5.128006000 |
| C | -6.867177000  | 0.633556000  | 4.686110000  |
| C | 6.886459000   | -0.579246000 | -4.655836000 |
| C | -7.783583000  | 0.467037000  | 3.652175000  |
| C | 7.800541000   | -0.416944000 | -3.621136000 |
| H | -8.847384000  | 0.486066000  | 3.858554000  |
| C | -7.332159000  | 0.274730000  | 2.343670000  |
| C | 7.352676000   | -0.225943000 | -2.310681000 |
| C | -8.237007000  | 0.088261000  | 1.192380000  |
| C | 8.254189000   | -0.043828000 | -1.163593000 |
| C | -9.634151000  | 0.066885000  | 1.210940000  |
| C | 9.650186000   | -0.023422000 | -1.176770000 |
| H | -10.184299000 | 0.197334000  | 2.135610000  |
| H | 10.199705000  | -0.153462000 | -2.101953000 |
| C | -10.319751000 | -0.127843000 | 0.009600000  |
| C | 10.337219000  | 0.169139000  | 0.024293000  |
| C | -9.616973000  | -0.297809000 | -1.185461000 |
| C | 9.633144000   | 0.338413000  | 1.218906000  |
| C | -8.220062000  | -0.268883000 | -1.154046000 |
| C | 8.237334000   | 0.311867000  | 1.192505000  |
| C | -7.299159000  | -0.426423000 | -2.296796000 |
| C | 7.320061000   | 0.466764000  | 2.330995000  |
| C | -7.733689000  | -0.632397000 | -3.608847000 |
| C | 7.751307000   | 0.671051000  | 3.644912000  |
| H | -8.794693000  | -0.685078000 | -3.823507000 |
| C | -6.804309000  | -0.769884000 | -4.635410000 |
| C | 6.824525000   | 0.805575000  | 4.672251000  |
| C | -5.446002000  | -0.696604000 | -4.325393000 |
| C | 5.464454000   | 0.730956000  | 4.361934000  |
| H | 4.702438000   | 0.829451000  | 5.127314000  |
| C | -5.068685000  | -0.490047000 | -3.003181000 |
| C | 5.083867000   | 0.527063000  | 3.043332000  |
| H | 4.041321000   | 0.462151000  | 2.757525000  |
| C | -5.978960000  | -3.093900000 | 0.332298000  |
| C | 5.966616000   | 3.146835000  | -0.288417000 |
| H | -7.021812000  | -2.797101000 | 0.347004000  |
| H | 7.009686000   | 2.852650000  | -0.297098000 |
| C | -5.636464000  | -4.431797000 | 0.334523000  |
| C | 5.619436000   | 4.481178000  | -0.298532000 |
| H | -6.396159000  | -5.204262000 | 0.362077000  |
| H | 6.377773000   | 5.254877000  | -0.325902000 |
| C | -4.274971000  | -4.770592000 | 0.265160000  |
| C | 4.256003000   | 4.817910000  | -0.237133000 |
| C | -3.329777000  | -3.740770000 | 0.236591000  |
| C | 3.313997000   | 3.786783000  | -0.208920000 |
| H | -2.281675000  | -3.970761000 | 0.130701000  |
| H | 2.265181000   | 4.015231000  | -0.108269000 |
| C | -3.735929000  | -2.397550000 | 0.295841000  |
| C | 3.718108000   | 2.442383000  | -0.260276000 |
| C | -2.847814000  | -1.223629000 | 0.252803000  |

|   |              |              |              |
|---|--------------|--------------|--------------|
| C | 2.830303000  | 1.272430000  | -0.217049000 |
| C | -3.558703000 | -0.022528000 | 0.036307000  |
| C | 3.544244000  | 0.068468000  | -0.002143000 |
| C | -2.880642000 | 1.195394000  | -0.187962000 |
| C | 2.862885000  | -1.152328000 | 0.220820000  |
| C | -3.796475000 | 2.348076000  | -0.229138000 |
| C | 3.778428000  | -2.301532000 | 0.261904000  |
| C | -3.436076000 | 3.695822000  | -0.170214000 |
| C | 3.419680000  | -3.650236000 | 0.211275000  |
| H | -2.401274000 | 3.991660000  | -0.073304000 |
| H | 2.383937000  | -3.944089000 | 0.120420000  |
| C | -4.406655000 | 4.706650000  | -0.191208000 |
| C | 4.386727000  | -4.662880000 | 0.231977000  |
| C | -5.757385000 | 4.338569000  | -0.257561000 |
| C | 5.739443000  | -4.296977000 | 0.289801000  |
| H | -6.562068000 | 5.061188000  | -0.282826000 |
| H | 6.542644000  | -5.021157000 | 0.314884000  |
| C | -6.057536000 | 2.982821000  | -0.259128000 |
| C | 6.044834000  | -2.944814000 | 0.283158000  |
| H | -7.093120000 | 2.661057000  | -0.272362000 |
| H | 7.080749000  | -2.625914000 | 0.290426000  |
| C | -1.466800000 | 1.194536000  | -0.346448000 |
| C | 1.450079000  | -1.149673000 | 0.380104000  |
| C | -0.728136000 | 0.013315000  | 0.021196000  |
| C | 0.711964000  | 0.032861000  | 0.013553000  |
| C | -1.431930000 | -1.186433000 | 0.397257000  |
| C | 1.415099000  | 1.233593000  | -0.361791000 |
| C | -0.655969000 | -2.247352000 | 0.963854000  |
| C | 0.638183000  | 2.293684000  | -0.929027000 |
| H | -1.159280000 | -3.062292000 | 1.469720000  |
| H | 1.140735000  | 3.108443000  | -1.435749000 |
| C | 0.708438000  | -2.230532000 | 0.954564000  |
| C | -0.726284000 | 2.276100000  | -0.920133000 |
| H | 1.239615000  | -3.033396000 | 1.450849000  |
| H | -1.258218000 | 3.079216000  | -1.415377000 |
| O | -3.984120000 | -6.085663000 | 0.223156000  |
| O | 3.927019000  | -5.928760000 | 0.184172000  |
| O | 3.963335000  | 6.132629000  | -0.200928000 |
| O | -3.949177000 | 5.973133000  | -0.135964000 |
| C | -4.894376000 | 7.059464000  | -0.134739000 |
| C | -4.135115000 | 8.391701000  | -0.055836000 |
| C | -5.192181000 | 9.513372000  | -0.051631000 |
| C | -3.215437000 | 8.549834000  | -1.281464000 |
| C | -3.307218000 | 8.454393000  | 1.241672000  |
| C | 2.588310000  | 6.550830000  | -0.127070000 |
| C | 2.525398000  | 8.085117000  | -0.150815000 |
| C | 1.038746000  | 8.478027000  | -0.047890000 |
| C | 3.300617000  | 8.666577000  | 1.046616000  |
| C | 3.113697000  | 8.615927000  | -1.471926000 |
| C | -2.610157000 | -6.506079000 | 0.142823000  |
| C | -2.550311000 | -8.040614000 | 0.159673000  |

|   |              |               |              |
|---|--------------|---------------|--------------|
| C | -3.136307000 | -8.576196000  | 1.479869000  |
| C | -3.329768000 | -8.615109000  | -1.038371000 |
| C | -1.064764000 | -8.436140000  | 0.051161000  |
| C | 4.870343000  | -7.016852000  | 0.183611000  |
| C | 4.108279000  | -8.348062000  | 0.115178000  |
| C | 3.274065000  | -8.415893000  | -1.178005000 |
| C | 3.194331000  | -8.498201000  | 1.346077000  |
| C | 5.163378000  | -9.471593000  | 0.111639000  |
| H | -5.565847000 | 6.947992000   | 0.726449000  |
| H | -5.492716000 | 7.013926000   | -1.053920000 |
| H | -5.863973000 | 9.426983000   | 0.811003000  |
| H | -5.802851000 | 9.492257000   | -0.962432000 |
| H | -4.703709000 | 10.492846000  | 0.001151000  |
| H | -3.791800000 | 8.517188000   | -2.214467000 |
| H | -2.462980000 | 7.755260000   | -1.319574000 |
| H | -2.691660000 | 9.512016000   | -1.243816000 |
| H | -3.950088000 | 8.356828000   | 2.125355000  |
| H | -2.782114000 | 9.413930000   | 1.312803000  |
| H | -2.559934000 | 7.654975000   | 1.275910000  |
| H | 2.039873000  | 6.132274000   | -0.980976000 |
| H | 2.145521000  | 6.161319000   | 0.798996000  |
| H | 0.933869000  | 9.568684000   | -0.066801000 |
| H | 0.591463000  | 8.114903000   | 0.885531000  |
| H | 0.457032000  | 8.071788000   | -0.884405000 |
| H | 2.889324000  | 8.304537000   | 1.997041000  |
| H | 3.235603000  | 9.760813000   | 1.047346000  |
| H | 4.358797000  | 8.389059000   | 1.006756000  |
| H | 2.562012000  | 8.223934000   | -2.335515000 |
| H | 4.164473000  | 8.328827000   | -1.581422000 |
| H | 3.054994000  | 9.709948000   | -1.504181000 |
| H | -2.057888000 | -6.092333000  | 0.996617000  |
| H | -2.169550000 | -6.113719000  | -0.783072000 |
| H | -2.581783000 | -8.189034000  | 2.343817000  |
| H | -3.079532000 | -9.670458000  | 1.507183000  |
| H | -4.186276000 | -8.287677000  | 1.593247000  |
| H | -4.387240000 | -8.335491000  | -0.994637000 |
| H | -3.267108000 | -9.709472000  | -1.044151000 |
| H | -2.920065000 | -8.249724000  | -1.988211000 |
| H | -0.480358000 | -8.035680000  | 0.888571000  |
| H | -0.618888000 | -8.068811000  | -0.881285000 |
| H | -0.962164000 | -9.527104000  | 0.063862000  |
| H | 5.473249000  | -6.967862000  | 1.099603000  |
| H | 5.537636000  | -6.910883000  | -0.681501000 |
| H | 2.747028000  | -9.374888000  | -1.241738000 |
| H | 3.912870000  | -8.323904000  | -2.065224000 |
| H | 2.527946000  | -7.615409000  | -1.212764000 |
| H | 2.444015000  | -7.701611000  | 1.384173000  |
| H | 3.775431000  | -8.462528000  | 2.276025000  |
| H | 2.668071000  | -9.459278000  | 1.315589000  |
| H | 5.831081000  | -9.390932000  | -0.754716000 |
| H | 4.672910000  | -10.450441000 | 0.066355000  |

|   |               |              |              |
|---|---------------|--------------|--------------|
| H | 5.778506000   | -9.446831000 | 1.019343000  |
| H | -4.752024000  | 0.729455000  | 5.157832000  |
| H | -7.211558000  | 0.782999000  | 5.704118000  |
| H | -4.063775000  | 0.379899000  | 2.789165000  |
| H | -10.153120000 | -0.448349000 | -2.115325000 |
| H | -11.404314000 | -0.147272000 | 0.004843000  |
| H | -7.135566000  | -0.930361000 | -5.656095000 |
| H | -4.683446000  | -0.797354000 | -5.089934000 |
| H | -4.025968000  | -0.425693000 | -2.715910000 |
| H | 7.230925000   | -0.727393000 | -5.673850000 |
| H | 8.864687000   | -0.437821000 | -3.825591000 |
| H | 11.421645000  | 0.187274000  | 0.029205000  |
| H | 10.168792000  | 0.486996000  | 2.149451000  |
| H | 8.812671000   | 0.724448000  | 3.857635000  |
| H | 7.156087000   | 0.964616000  | 5.692907000  |

Cartesian coordinates of DFT-optimized structure of **13** complex by B3LYP/Def2-TZVP; 6-31G(d,p)/CH<sub>3</sub>CN, charge = 2, multiplicity = 1

|    |              |              |              |
|----|--------------|--------------|--------------|
| Ru | 4.994221000  | -0.359596000 | -0.209237000 |
| N  | 5.481123000  | 0.159256000  | 1.766317000  |
| N  | 7.030483000  | -0.457727000 | -0.236939000 |
| N  | 5.375215000  | -0.920043000 | -2.196643000 |
| C  | 4.627950000  | 0.467990000  | 2.762087000  |
| H  | 3.575977000  | 0.437333000  | 2.504040000  |
| C  | 5.050203000  | 0.805586000  | 4.043657000  |
| H  | 4.314840000  | 1.045403000  | 4.803749000  |
| C  | 6.417215000  | 0.826803000  | 4.318169000  |
| H  | 6.783649000  | 1.085734000  | 5.306047000  |
| C  | 7.310658000  | 0.508100000  | 3.299302000  |
| H  | 8.377732000  | 0.516593000  | 3.488541000  |
| C  | 6.830949000  | 0.176758000  | 2.029834000  |
| C  | 7.712024000  | -0.174099000 | 0.897039000  |
| C  | 9.108254000  | -0.234439000 | 0.903187000  |
| H  | 9.674895000  | -0.012079000 | 1.799746000  |
| C  | 9.769830000  | -0.590107000 | -0.274080000 |
| C  | 9.045445000  | -0.878786000 | -1.432556000 |
| H  | 9.563541000  | -1.153612000 | -2.343809000 |
| C  | 7.650580000  | -0.804228000 | -1.388574000 |
| C  | 6.709448000  | -1.066951000 | -2.496677000 |
| C  | 7.120450000  | -1.440874000 | -3.778369000 |
| H  | 8.176228000  | -1.551687000 | -3.996521000 |
| C  | 6.173187000  | -1.670441000 | -4.772295000 |
| H  | 6.486076000  | -1.961820000 | -5.769502000 |
| C  | 4.822514000  | -1.518170000 | -4.460816000 |
| H  | 4.047152000  | -1.684836000 | -5.200443000 |
| C  | 4.469609000  | -1.143593000 | -3.168594000 |
| H  | 3.432852000  | -1.012194000 | -2.882163000 |
| C  | -3.313390000 | 1.205481000  | -0.411569000 |
| C  | 2.259211000  | -1.389270000 | 0.150934000  |

|    |               |              |              |
|----|---------------|--------------|--------------|
| C  | -4.071288000  | 0.078909000  | -0.076463000 |
| C  | 3.014276000   | -0.264261000 | -0.181801000 |
| C  | -3.416280000  | -1.116317000 | 0.237013000  |
| C  | 2.361804000   | 0.928702000  | -0.494211000 |
| C  | -2.011021000  | -1.195211000 | 0.341044000  |
| C  | 0.955477000   | 1.008191000  | -0.600362000 |
| C  | -1.245984000  | -0.058280000 | -0.119326000 |
| C  | 0.189846000   | -0.127820000 | -0.140672000 |
| C  | -1.910890000  | 1.148008000  | -0.558204000 |
| C  | 0.855452000   | -1.333046000 | 0.297978000  |
| C  | -1.114553000  | 2.171332000  | -1.163435000 |
| C  | 0.060718000   | -2.357155000 | 0.902920000  |
| H  | -1.595982000  | 2.990883000  | -1.680836000 |
| H  | 0.543538000   | -3.177104000 | 1.418688000  |
| C  | 0.245815000   | 2.104986000  | -1.183262000 |
| C  | -1.299683000  | -2.291731000 | 0.923535000  |
| H  | 0.790087000   | 2.875074000  | -1.714465000 |
| H  | -1.842487000  | -3.061795000 | 1.455994000  |
| H  | 10.853233000  | -0.642483000 | -0.288765000 |
| N  | -4.349661000  | -2.174927000 | 0.459070000  |
| N  | -5.693723000  | -1.825537000 | 0.442006000  |
| C  | -6.382368000  | -2.962693000 | 0.592071000  |
| C  | -5.511364000  | -4.059189000 | 0.686794000  |
| C  | -4.239344000  | -3.529130000 | 0.586442000  |
| H  | -7.462117000  | -2.933272000 | 0.611082000  |
| H  | -5.771970000  | -5.100238000 | 0.803580000  |
| H  | -3.284257000  | -4.023677000 | 0.562898000  |
| Os | -6.069743000  | 0.176238000  | -0.044847000 |
| C  | -5.903101000  | 1.316927000  | 4.214066000  |
| C  | -5.549331000  | 0.948199000  | 2.923229000  |
| N  | -6.456414000  | 0.727605000  | 1.944657000  |
| C  | -7.795562000  | 0.875426000  | 2.249666000  |
| C  | -8.201069000  | 1.244717000  | 3.534709000  |
| C  | -7.254580000  | 1.469549000  | 4.528783000  |
| C  | -8.736582000  | 0.618996000  | 1.146591000  |
| N  | -8.113260000  | 0.275704000  | -0.012035000 |
| C  | -8.803787000  | -0.003732000 | -1.149522000 |
| C  | -10.198839000 | 0.058152000  | -1.147746000 |
| C  | -10.858627000 | 0.409066000  | 0.032153000  |
| C  | -10.130399000 | 0.692568000  | 1.189710000  |
| C  | -7.927917000  | -0.348341000 | -2.281851000 |
| N  | -6.571666000  | -0.331669000 | -2.020119000 |
| C  | -5.722068000  | -0.637401000 | -3.026988000 |
| C  | -6.151106000  | -0.967701000 | -4.305347000 |
| C  | -7.520399000  | -0.987964000 | -4.576373000 |
| C  | -8.408290000  | -0.674218000 | -3.552760000 |
| H  | -4.513185000  | 0.817187000  | 2.636269000  |
| H  | -5.126806000  | 1.479919000  | 4.953555000  |
| H  | -7.566056000  | 1.757132000  | 5.527373000  |
| H  | -9.256807000  | 1.355322000  | 3.753147000  |
| H  | -10.645891000 | 0.963759000  | 2.103578000  |

|   |               |              |              |
|---|---------------|--------------|--------------|
| H | -11.941833000 | 0.461669000  | 0.049592000  |
| H | -10.767250000 | -0.160420000 | -2.044159000 |
| H | -9.476229000  | -0.681479000 | -3.737124000 |
| H | -7.890122000  | -1.242142000 | -5.564098000 |
| H | -5.418370000  | -1.203844000 | -5.069139000 |
| H | -4.669437000  | -0.608004000 | -2.773583000 |
| N | -4.146085000  | 2.349986000  | -0.606265000 |
| N | -5.516525000  | 2.132692000  | -0.546543000 |
| C | -6.095916000  | 3.331490000  | -0.677158000 |
| C | -5.126006000  | 4.338371000  | -0.801163000 |
| C | -3.908919000  | 3.687236000  | -0.739629000 |
| H | -2.910099000  | 4.086753000  | -0.746963000 |
| H | -5.287872000  | 5.399931000  | -0.911731000 |
| H | -7.173486000  | 3.407034000  | -0.662341000 |
| N | 3.089010000   | -2.536467000 | 0.344562000  |
| C | 2.848073000   | -3.874673000 | 0.457883000  |
| C | 4.064977000   | -4.525715000 | 0.523460000  |
| C | 5.033663000   | -3.512825000 | 0.421328000  |
| N | 4.454871000   | -2.315694000 | 0.301068000  |
| N | 3.292305000   | 1.991012000  | -0.712855000 |
| N | 4.631296000   | 1.639871000  | -0.707180000 |
| C | 5.318931000   | 2.775897000  | -0.845680000 |
| C | 4.449663000   | 3.877345000  | -0.922478000 |
| C | 3.178108000   | 3.346297000  | -0.821772000 |
| H | 1.848829000   | -4.273728000 | 0.450961000  |
| H | 4.227582000   | -5.588337000 | 0.622643000  |
| H | 6.111642000   | -3.588004000 | 0.415945000  |
| H | 2.222485000   | 3.839639000  | -0.787651000 |
| H | 4.710855000   | 4.919497000  | -1.028033000 |
| H | 6.398870000   | 2.747046000  | -0.870546000 |

Cartesian coordinates of DFT-optimized structure of **14** complex by B3LYP/Def2-TZVP;  
6-31G(d,p)/CH<sub>3</sub>CN, charge = 2, multiplicity = 1

|    |             |              |              |
|----|-------------|--------------|--------------|
| Ru | 4.788695000 | -0.232542000 | -0.207043000 |
| N  | 5.321905000 | 0.678685000  | 1.607143000  |
| N  | 6.824542000 | -0.329496000 | -0.269043000 |
| N  | 5.122953000 | -1.184768000 | -2.047839000 |
| C  | 4.492425000 | 1.183362000  | 2.541089000  |
| H  | 3.434460000 | 1.099691000  | 2.322320000  |
| C  | 4.944999000 | 1.777537000  | 3.714505000  |
| H  | 4.227592000 | 2.166216000  | 4.428841000  |
| C  | 6.318461000 | 1.858678000  | 3.941526000  |
| H  | 6.708356000 | 2.315580000  | 4.845136000  |
| C  | 7.187718000 | 1.341281000  | 2.985200000  |
| H  | 8.259267000 | 1.392523000  | 3.138883000  |
| C  | 6.677981000 | 0.754600000  | 1.824483000  |
| C  | 7.532567000 | 0.181793000  | 0.764419000  |
| C  | 8.928933000 | 0.127398000  | 0.745464000  |
| H  | 9.516784000 | 0.529636000  | 1.562155000  |

|    |               |              |              |
|----|---------------|--------------|--------------|
| C  | 9.562816000   | -0.460066000 | -0.351565000 |
| C  | 8.811265000   | -0.981413000 | -1.406866000 |
| H  | 9.308075000   | -1.435801000 | -2.256059000 |
| C  | 7.417442000   | -0.902836000 | -1.341541000 |
| C  | 6.450011000   | -1.388150000 | -2.346702000 |
| C  | 6.831010000   | -2.015408000 | -3.535263000 |
| H  | 7.881659000   | -2.167407000 | -3.752990000 |
| C  | 5.860604000   | -2.443587000 | -4.436814000 |
| H  | 6.150166000   | -2.931343000 | -5.361766000 |
| C  | 4.517280000   | -2.232971000 | -4.127578000 |
| H  | 3.724514000   | -2.547940000 | -4.797155000 |
| C  | 4.194650000   | -1.603737000 | -2.929784000 |
| H  | 3.164489000   | -1.420077000 | -2.648464000 |
| C  | -3.546478000  | 1.277339000  | -0.463874000 |
| C  | 2.071693000   | -1.178208000 | 0.421484000  |
| C  | -4.280915000  | 0.174069000  | 0.033623000  |
| C  | 2.808807000   | -0.139373000 | -0.147492000 |
| C  | -3.622100000  | -0.990478000 | 0.497736000  |
| C  | 2.138647000   | 0.964042000  | -0.677060000 |
| C  | -2.204666000  | -0.995623000 | 0.613267000  |
| C  | 0.728519000   | 1.016686000  | -0.758316000 |
| C  | -1.452628000  | 0.050655000  | -0.035125000 |
| C  | -0.015614000  | -0.012150000 | -0.071329000 |
| C  | -2.141968000  | 1.160929000  | -0.646829000 |
| C  | 0.668953000   | -1.103984000 | 0.579141000  |
| C  | -1.368854000  | 2.045675000  | -1.464646000 |
| C  | -0.108928000  | -1.992970000 | 1.384682000  |
| H  | -1.877207000  | 2.752905000  | -2.107921000 |
| H  | 0.387080000   | -2.685672000 | 2.052503000  |
| C  | -0.008340000  | 1.976511000  | -1.520459000 |
| C  | -1.471517000  | -1.941457000 | 1.398781000  |
| H  | 0.512436000   | 2.628927000  | -2.209565000 |
| H  | -2.005742000  | -2.596968000 | 2.075245000  |
| H  | 10.645862000  | -0.511848000 | -0.384089000 |
| Os | -6.273210000  | 0.257306000  | 0.071909000  |
| C  | -6.099900000  | 1.850616000  | 4.175959000  |
| C  | -5.750297000  | 1.351844000  | 2.929374000  |
| N  | -6.662088000  | 1.011995000  | 1.987911000  |
| C  | -8.001876000  | 1.172862000  | 2.288649000  |
| C  | -8.402214000  | 1.672142000  | 3.531527000  |
| C  | -7.451990000  | 2.014944000  | 4.486522000  |
| C  | -8.944367000  | 0.786628000  | 1.228214000  |
| N  | -8.317301000  | 0.332163000  | 0.106689000  |
| C  | -9.013243000  | -0.077882000 | -0.990958000 |
| C  | -10.409018000 | -0.039604000 | -0.984236000 |
| C  | -11.069140000 | 0.422941000  | 0.156722000  |
| C  | -10.338921000 | 0.840060000  | 1.272255000  |
| C  | -8.137879000  | -0.524310000 | -2.084547000 |
| N  | -6.780347000  | -0.459638000 | -1.831114000 |
| C  | -5.928590000  | -0.857230000 | -2.805584000 |
| C  | -6.356216000  | -1.323055000 | -4.040535000 |

|   |               |              |              |
|---|---------------|--------------|--------------|
| C | -7.726655000  | -1.390320000 | -4.303379000 |
| C | -8.616002000  | -0.986728000 | -3.314131000 |
| H | -4.714851000  | 1.208812000  | 2.646036000  |
| H | -5.320482000  | 2.104564000  | 4.886001000  |
| H | -7.759616000  | 2.402372000  | 5.452038000  |
| H | -9.457927000  | 1.791076000  | 3.746040000  |
| H | -10.854167000 | 1.198250000  | 2.155986000  |
| H | -12.152975000 | 0.458492000  | 0.176527000  |
| H | -10.978174000 | -0.362381000 | -1.848364000 |
| H | -9.684381000  | -1.028693000 | -3.491511000 |
| H | -8.094640000  | -1.749497000 | -5.258645000 |
| H | -5.622146000  | -1.627025000 | -4.778718000 |
| H | -4.876408000  | -0.788519000 | -2.558627000 |
| N | 2.916161000   | -2.257763000 | 0.824334000  |
| C | 2.691040000   | -3.545015000 | 1.217964000  |
| C | 3.915188000   | -4.162744000 | 1.386080000  |
| C | 4.871575000   | -3.188143000 | 1.053570000  |
| N | 4.278961000   | -2.044385000 | 0.703534000  |
| N | 3.054876000   | 1.962589000  | -1.129598000 |
| N | 4.396815000   | 1.622910000  | -1.089315000 |
| C | 5.071354000   | 2.708321000  | -1.475161000 |
| C | 4.191661000   | 3.768999000  | -1.751473000 |
| C | 2.927469000   | 3.266948000  | -1.510460000 |
| H | 1.696176000   | -3.942009000 | 1.318766000  |
| H | 4.090400000   | -5.181340000 | 1.697822000  |
| H | 5.949758000   | -3.257869000 | 1.036852000  |
| H | 1.969504000   | 3.755082000  | -1.552231000 |
| H | 4.442112000   | 4.768361000  | -2.073942000 |
| H | 6.150478000   | 2.677798000  | -1.523462000 |
| C | -4.564252000  | -2.072807000 | 0.812549000  |
| C | -4.229330000  | -3.416995000 | 1.046034000  |
| C | -5.221501000  | -4.363796000 | 1.312330000  |
| C | -6.563496000  | -3.945433000 | 1.330940000  |
| C | -6.843256000  | -2.627067000 | 1.040472000  |
| N | -5.897290000  | -1.698271000 | 0.767992000  |
| O | -4.998035000  | -5.671210000 | 1.548812000  |
| C | -3.650049000  | -6.174549000 | 1.532349000  |
| C | -3.669681000  | -7.677468000 | 1.847520000  |
| C | -2.209099000  | -8.167606000 | 1.807706000  |
| C | -4.259343000  | -7.914704000 | 3.250789000  |
| C | -4.498957000  | -8.429878000 | 0.789533000  |
| C | -4.404170000  | 2.438929000  | -0.738865000 |
| N | -5.768173000  | 2.180437000  | -0.636169000 |
| C | -6.635768000  | 3.185705000  | -0.862303000 |
| C | -6.263443000  | 4.486739000  | -1.164363000 |
| C | -4.892897000  | 4.781582000  | -1.205527000 |
| C | -3.977317000  | 3.745195000  | -0.985028000 |
| O | -4.367906000  | 6.001319000  | -1.433749000 |
| C | -5.250771000  | 7.118785000  | -1.646039000 |
| C | -4.414130000  | 8.389870000  | -1.852139000 |
| C | -5.403494000  | 9.550701000  | -2.073955000 |

|   |              |              |              |
|---|--------------|--------------|--------------|
| C | -3.510388000 | 8.233916000  | -3.089791000 |
| C | -3.558285000 | 8.668502000  | -0.601950000 |
| H | -3.196421000 | -3.719183000 | 0.978128000  |
| H | -7.358077000 | -4.651536000 | 1.541720000  |
| H | -7.868818000 | -2.277818000 | 1.010399000  |
| H | -3.056016000 | -5.632884000 | 2.280149000  |
| H | -3.213065000 | -5.995495000 | 0.541265000  |
| H | -1.761210000 | -8.012996000 | 0.818496000  |
| H | -2.164516000 | -9.239391000 | 2.031371000  |
| H | -1.590276000 | -7.644987000 | 2.547290000  |
| H | -3.671043000 | -7.397010000 | 4.018691000  |
| H | -4.256728000 | -8.984395000 | 3.490029000  |
| H | -5.291329000 | -7.554880000 | 3.313226000  |
| H | -4.090970000 | -8.273784000 | -0.216863000 |
| H | -5.540957000 | -8.094391000 | 0.789352000  |
| H | -4.488658000 | -9.506988000 | 0.992840000  |
| H | -7.685705000 | 2.927409000  | -0.784496000 |
| H | -7.029154000 | 5.232228000  | -1.333421000 |
| H | -2.926082000 | 3.995304000  | -0.975957000 |
| H | -5.906714000 | 7.227699000  | -0.772642000 |
| H | -5.872509000 | 6.920976000  | -2.528896000 |
| H | -6.032353000 | 9.378635000  | -2.956037000 |
| H | -4.857566000 | 10.487981000 | -2.230106000 |
| H | -6.062466000 | 9.687623000  | -1.207829000 |
| H | -4.105295000 | 8.046045000  | -3.992204000 |
| H | -2.808844000 | 7.402665000  | -2.966363000 |
| H | -2.928767000 | 9.148211000  | -3.255071000 |
| H | -4.187568000 | 8.789688000  | 0.288529000  |
| H | -2.980570000 | 9.590719000  | -0.733106000 |
| H | -2.855262000 | 7.851139000  | -0.412029000 |

Cartesian coordinates of DFT-optimized structure of **15** complex by B3LYP/Def2-TZVP;  
6-31G(d,p)/CH<sub>3</sub>CN, charge = 2, multiplicity = 1

|    |             |              |              |
|----|-------------|--------------|--------------|
| Os | 4.796470000 | -0.234276000 | -0.206483000 |
| N  | 5.342060000 | 0.680094000  | 1.603206000  |
| N  | 6.839380000 | -0.332534000 | -0.270652000 |
| N  | 5.138489000 | -1.191346000 | -2.043950000 |
| C  | 4.515227000 | 1.191314000  | 2.543550000  |
| H  | 3.456993000 | 1.108217000  | 2.328303000  |
| C  | 4.973010000 | 1.786866000  | 3.711120000  |
| H  | 4.257411000 | 2.178145000  | 4.425875000  |
| C  | 6.348385000 | 1.868414000  | 3.935873000  |
| H  | 6.740412000 | 2.327674000  | 4.837187000  |
| C  | 7.213213000 | 1.347942000  | 2.978937000  |
| H  | 8.285316000 | 1.398635000  | 3.128858000  |
| C  | 6.704276000 | 0.757317000  | 1.819576000  |
| C  | 7.555097000 | 0.183592000  | 0.763816000  |
| C  | 8.950160000 | 0.127105000  | 0.739115000  |
| H  | 9.538770000 | 0.532091000  | 1.553964000  |

|    |               |              |              |
|----|---------------|--------------|--------------|
| C  | 9.583656000   | -0.463728000 | -0.356568000 |
| C  | 8.829679000   | -0.988218000 | -1.408797000 |
| H  | 9.324976000   | -1.445324000 | -2.257469000 |
| C  | 7.436757000   | -0.911531000 | -1.346001000 |
| C  | 6.470829000   | -1.397826000 | -2.344844000 |
| C  | 6.847826000   | -2.029892000 | -3.532437000 |
| H  | 7.898758000   | -2.182396000 | -3.748453000 |
| C  | 5.879334000   | -2.461331000 | -4.432639000 |
| H  | 6.168662000   | -2.952416000 | -5.355727000 |
| C  | 4.534797000   | -2.248866000 | -4.122919000 |
| H  | 3.741947000   | -2.566340000 | -4.791240000 |
| C  | 4.209677000   | -1.616778000 | -2.930381000 |
| H  | 3.179694000   | -1.432561000 | -2.650648000 |
| C  | -3.559943000  | 1.275603000  | -0.464807000 |
| C  | 2.058014000   | -1.176480000 | 0.430978000  |
| C  | -4.291258000  | 0.175938000  | 0.034234000  |
| C  | 2.797906000   | -0.139039000 | -0.145256000 |
| C  | -3.635740000  | -0.984918000 | 0.500399000  |
| C  | 2.125306000   | 0.963779000  | -0.681528000 |
| C  | -2.217715000  | -0.991502000 | 0.617013000  |
| C  | 0.716220000   | 1.016283000  | -0.760533000 |
| C  | -1.464559000  | 0.052227000  | -0.033526000 |
| C  | -0.027584000  | -0.010912000 | -0.069296000 |
| C  | -2.154430000  | 1.160025000  | -0.647965000 |
| C  | 0.656238000   | -1.101417000 | 0.585764000  |
| C  | -1.382463000  | 2.043786000  | -1.467315000 |
| C  | -0.123820000  | -1.988310000 | 1.392397000  |
| H  | -1.891604000  | 2.751069000  | -2.110055000 |
| H  | 0.370251000   | -2.679364000 | 2.063000000  |
| C  | -0.022069000  | 1.974230000  | -1.524431000 |
| C  | -1.486314000  | -1.936761000 | 1.404325000  |
| H  | 0.497308000   | 2.624841000  | -2.216033000 |
| H  | -2.022038000  | -2.592223000 | 2.079790000  |
| H  | 10.666515000  | -0.515573000 | -0.390375000 |
| Ru | -6.263356000  | 0.258545000  | 0.071914000  |
| C  | -6.077959000  | 1.855398000  | 4.172958000  |
| C  | -5.731526000  | 1.354976000  | 2.922882000  |
| N  | -6.643014000  | 1.016795000  | 1.988551000  |
| C  | -7.977168000  | 1.175470000  | 2.287722000  |
| C  | -8.381014000  | 1.674550000  | 3.528992000  |
| C  | -7.428339000  | 2.018548000  | 4.483227000  |
| C  | -8.923296000  | 0.786614000  | 1.223373000  |
| N  | -8.303617000  | 0.333945000  | 0.106375000  |
| C  | -8.991991000  | -0.075202000 | -0.986820000 |
| C  | -10.389068000 | -0.038740000 | -0.984926000 |
| C  | -11.047794000 | 0.424365000  | 0.156400000  |
| C  | -10.318848000 | 0.841963000  | 1.272364000  |
| C  | -8.113399000  | -0.525500000 | -2.084107000 |
| N  | -6.761733000  | -0.463608000 | -1.831646000 |
| C  | -5.909899000  | -0.860958000 | -2.798386000 |
| C  | -6.334590000  | -1.329054000 | -4.036797000 |

|   |               |              |              |
|---|---------------|--------------|--------------|
| C | -7.703187000  | -1.394083000 | -4.299884000 |
| C | -8.594923000  | -0.987730000 | -3.311876000 |
| H | -4.695890000  | 1.211856000  | 2.638361000  |
| H | -5.298127000  | 2.109882000  | 4.882349000  |
| H | -7.735799000  | 2.406261000  | 5.448845000  |
| H | -9.436361000  | 1.793146000  | 3.745452000  |
| H | -10.834637000 | 1.200304000  | 2.155631000  |
| H | -12.131788000 | 0.459916000  | 0.176241000  |
| H | -10.958823000 | -0.361967000 | -1.848403000 |
| H | -9.662953000  | -1.028484000 | -3.491596000 |
| H | -8.071020000  | -1.753759000 | -5.255189000 |
| H | -5.600144000  | -1.634763000 | -4.773881000 |
| H | -4.857501000  | -0.792914000 | -2.549886000 |
| N | 2.905861000   | -2.250295000 | 0.841311000  |
| C | 2.685934000   | -3.530291000 | 1.261381000  |
| C | 3.910657000   | -4.146128000 | 1.432408000  |
| C | 4.867278000   | -3.182687000 | 1.076303000  |
| N | 4.273012000   | -2.042537000 | 0.707347000  |
| N | 3.044510000   | 1.955951000  | -1.141285000 |
| N | 4.391776000   | 1.620164000  | -1.089616000 |
| C | 5.067095000   | 2.702021000  | -1.493203000 |
| C | 4.185418000   | 3.753057000  | -1.790399000 |
| C | 2.920755000   | 3.253598000  | -1.546236000 |
| H | 1.692217000   | -3.925664000 | 1.376227000  |
| H | 4.086001000   | -5.159111000 | 1.761701000  |
| H | 5.944988000   | -3.253231000 | 1.053618000  |
| H | 1.963275000   | 3.741026000  | -1.599938000 |
| H | 4.435057000   | 4.747293000  | -2.128782000 |
| H | 6.146120000   | 2.671391000  | -1.536557000 |
| C | -4.578582000  | -2.070955000 | 0.815511000  |
| C | -4.241701000  | -3.415632000 | 1.042013000  |
| C | -5.237014000  | -4.361128000 | 1.307200000  |
| C | -6.576965000  | -3.939748000 | 1.330214000  |
| C | -6.851658000  | -2.616664000 | 1.045834000  |
| N | -5.905151000  | -1.693299000 | 0.777824000  |
| O | -5.015346000  | -5.669793000 | 1.539320000  |
| C | -3.668441000  | -6.175776000 | 1.519348000  |
| C | -3.690525000  | -7.679226000 | 1.831922000  |
| C | -2.230961000  | -8.172132000 | 1.789100000  |
| C | -4.278529000  | -7.917844000 | 3.235665000  |
| C | -4.522849000  | -8.428173000 | 0.773881000  |
| C | -4.417175000  | 2.440915000  | -0.740636000 |
| N | -5.775567000  | 2.179085000  | -0.645535000 |
| C | -6.643618000  | 3.179090000  | -0.868224000 |
| C | -6.275382000  | 4.485027000  | -1.164543000 |
| C | -4.906281000  | 4.782703000  | -1.200316000 |
| C | -3.987707000  | 3.747432000  | -0.980158000 |
| O | -4.382788000  | 6.004110000  | -1.423696000 |
| C | -5.267291000  | 7.119909000  | -1.637022000 |
| C | -4.432815000  | 8.393068000  | -1.839131000 |
| C | -5.423940000  | 9.552154000  | -2.062141000 |

|   |              |              |              |
|---|--------------|--------------|--------------|
| C | -3.525363000 | 8.240662000  | -3.074496000 |
| C | -3.580945000 | 8.671815000  | -0.586245000 |
| H | -3.209481000 | -3.719993000 | 0.971099000  |
| H | -7.372934000 | -4.644892000 | 1.539352000  |
| H | -7.876764000 | -2.264149000 | 1.018803000  |
| H | -3.071749000 | -5.636823000 | 2.266974000  |
| H | -3.232847000 | -5.996001000 | 0.527783000  |
| H | -1.784210000 | -8.016580000 | 0.799518000  |
| H | -2.188063000 | -9.244409000 | 2.010766000  |
| H | -1.610050000 | -7.652007000 | 2.528702000  |
| H | -3.687931000 | -7.402805000 | 4.003589000  |
| H | -4.277797000 | -8.987971000 | 3.472970000  |
| H | -5.309630000 | -7.555911000 | 3.300365000  |
| H | -4.115904000 | -8.271320000 | -0.232827000 |
| H | -5.564119000 | -8.090435000 | 0.775641000  |
| H | -4.514614000 | -9.505644000 | 0.975395000  |
| H | -7.693717000 | 2.918091000  | -0.793719000 |
| H | -7.042222000 | 5.229600000  | -1.332847000 |
| H | -2.936896000 | 3.999823000  | -0.967281000 |
| H | -5.926067000 | 7.226306000  | -0.765419000 |
| H | -5.886188000 | 6.921963000  | -2.521856000 |
| H | -6.050092000 | 9.379878000  | -2.946116000 |
| H | -4.879558000 | 10.490760000 | -2.215701000 |
| H | -6.085553000 | 9.686645000  | -1.197649000 |
| H | -4.117427000 | 8.053158000  | -3.978863000 |
| H | -2.822729000 | 7.410434000  | -2.950408000 |
| H | -2.944882000 | 9.156229000  | -3.236746000 |
| H | -4.212899000 | 8.790716000  | 0.302655000  |
| H | -3.004651000 | 9.595318000  | -0.714621000 |
| H | -2.876905000 | 7.855557000  | -0.395356000 |

Cartesian coordinates of DFT-optimized structure of **16** complex by B3LYP/Def2-TZVP;  
6-31G(d,p)/CH<sub>3</sub>CN, charge = 2, multiplicity = 1

|    |              |              |              |
|----|--------------|--------------|--------------|
| Os | 5.643674000  | -0.955395000 | 0.034536000  |
| N  | 5.170269000  | 1.076201000  | -0.271282000 |
| N  | 6.094360000  | -1.301404000 | -1.985134000 |
| N  | 7.690504000  | -0.952141000 | 0.036693000  |
| N  | 6.087409000  | -0.596651000 | 2.052949000  |
| N  | -5.084343000 | 0.803343000  | -0.251643000 |
| C  | 5.214800000  | -1.468035000 | -2.999954000 |
| H  | 4.169309000  | -1.414849000 | -2.722416000 |
| C  | 5.607050000  | -1.693061000 | -4.312062000 |
| H  | 4.851681000  | -1.819295000 | -5.079903000 |
| C  | 6.969686000  | -1.752856000 | -4.611823000 |
| H  | 7.310674000  | -1.927201000 | -5.626839000 |
| C  | 7.887648000  | -1.583964000 | -3.581156000 |
| H  | 8.950991000  | -1.625562000 | -3.786613000 |
| C  | 7.444253000  | -1.359103000 | -2.274981000 |
| C  | 8.352178000  | -1.167388000 | -1.133191000 |

|   |              |              |              |
|---|--------------|--------------|--------------|
| C | 9.748312000  | -1.187942000 | -1.148356000 |
| H | 10.292414000 | -1.359825000 | -2.069752000 |
| C | 10.441485000 | -0.983757000 | 0.047014000  |
| C | 9.744287000  | -0.763384000 | 1.237171000  |
| H | 10.285331000 | -0.606897000 | 2.163104000  |
| C | 8.348209000  | -0.750918000 | 1.211402000  |
| C | 7.436593000  | -0.542046000 | 2.347359000  |
| C | 7.875871000  | -0.301692000 | 3.652087000  |
| H | 8.938587000  | -0.262090000 | 3.861108000  |
| C | 6.954648000  | -0.112034000 | 4.676308000  |
| H | 7.292524000  | 0.074631000  | 5.690173000  |
| C | 5.592951000  | -0.165477000 | 4.371293000  |
| H | 4.835245000  | -0.022022000 | 5.133790000  |
| C | 5.204652000  | -0.406969000 | 3.060865000  |
| H | 4.159870000  | -0.454766000 | 2.779576000  |
| C | 6.070941000  | 2.084026000  | -0.341593000 |
| H | 7.112024000  | 1.783577000  | -0.366137000 |
| C | 5.729292000  | 3.419386000  | -0.370865000 |
| H | 6.489952000  | 4.189110000  | -0.427891000 |
| C | 4.368818000  | 3.763009000  | -0.289789000 |
| C | 3.422385000  | 2.736980000  | -0.228042000 |
| H | 2.376625000  | 2.972593000  | -0.114333000 |
| C | 3.818889000  | 1.390226000  | -0.260474000 |
| C | -2.704824000 | -2.326740000 | 0.255901000  |
| C | 2.925526000  | 0.223867000  | -0.189048000 |
| C | -3.451261000 | -1.161685000 | 0.035249000  |
| C | 3.646539000  | -0.968560000 | 0.030683000  |
| C | -2.798596000 | 0.065105000  | -0.177371000 |
| C | 2.961737000  | -2.172871000 | 0.262133000  |
| C | -3.750704000 | 1.189014000  | -0.233850000 |
| C | -3.432882000 | 2.546545000  | -0.178799000 |
| H | -2.409183000 | 2.874818000  | -0.070621000 |
| C | -4.433039000 | 3.527799000  | -0.218030000 |
| C | -5.770904000 | 3.119577000  | -0.301936000 |
| H | -6.595948000 | 3.818208000  | -0.344463000 |
| C | -6.030419000 | 1.755097000  | -0.297973000 |
| H | -7.055291000 | 1.401010000  | -0.322130000 |
| C | -1.377927000 | 0.096963000  | -0.308457000 |
| C | 1.563390000  | -2.220954000 | 0.408788000  |
| C | -0.622326000 | -1.075083000 | 0.051086000  |
| C | 0.815778000  | -1.035030000 | 0.050559000  |
| C | -1.304573000 | -2.299358000 | 0.405669000  |
| C | 1.504591000  | 0.176136000  | -0.314943000 |
| C | -0.521926000 | -3.377853000 | 0.931671000  |
| C | 0.714124000  | 1.233866000  | -0.862198000 |
| H | -1.016002000 | -4.220340000 | 1.399168000  |
| H | 1.204068000  | 2.063371000  | -1.356207000 |
| C | 0.838835000  | -3.340151000 | 0.934357000  |
| C | -0.651011000 | 1.198101000  | -0.856050000 |
| H | 1.376139000  | -4.153712000 | 1.405092000  |
| H | -1.190387000 | 2.002685000  | -1.340056000 |

|   |              |              |              |
|---|--------------|--------------|--------------|
| O | 4.082644000  | 5.079130000  | -0.270238000 |
| O | -4.012324000 | 4.806311000  | -0.162185000 |
| C | -4.983830000 | 5.868880000  | -0.187425000 |
| C | -4.257211000 | 7.218153000  | -0.089111000 |
| C | -5.338033000 | 8.316471000  | -0.121411000 |
| C | -3.302236000 | 7.394174000  | -1.284902000 |
| C | -3.471734000 | 7.301304000  | 1.233492000  |
| C | 2.710389000  | 5.505789000  | -0.190624000 |
| C | 2.656676000  | 7.040088000  | -0.227243000 |
| C | 1.172400000  | 7.443622000  | -0.129249000 |
| C | 3.434010000  | 7.626479000  | 0.966444000  |
| C | 3.249283000  | 7.557345000  | -1.551749000 |
| H | -5.675251000 | 5.742229000  | 0.655681000  |
| H | -5.556032000 | 5.807815000  | -1.122272000 |
| H | -6.034939000 | 8.218861000  | 0.719980000  |
| H | -5.919476000 | 8.279571000  | -1.050746000 |
| H | -4.872787000 | 9.306560000  | -0.057052000 |
| H | -3.846864000 | 7.347237000  | -2.236078000 |
| H | -2.532136000 | 6.616017000  | -1.295754000 |
| H | -2.801197000 | 8.367676000  | -1.232322000 |
| H | -4.138381000 | 7.185399000  | 2.097087000  |
| H | -2.974809000 | 8.274364000  | 1.321121000  |
| H | -2.705008000 | 6.521859000  | 1.289751000  |
| H | 2.154234000  | 5.082148000  | -1.037087000 |
| H | 2.271388000  | 5.127768000  | 0.741892000  |
| H | 1.075552000  | 8.534820000  | -0.155717000 |
| H | 0.721848000  | 7.089948000  | 0.806159000  |
| H | 0.589231000  | 7.035282000  | -0.963790000 |
| H | 3.021772000  | 7.271733000  | 1.919240000  |
| H | 3.372364000  | 8.720912000  | 0.960489000  |
| H | 4.491406000  | 7.345778000  | 0.928225000  |
| H | 2.696748000  | 7.160866000  | -2.412723000 |
| H | 4.298890000  | 7.264929000  | -1.657505000 |
| H | 3.194878000  | 8.651359000  | -1.592536000 |
| H | 11.526005000 | -0.997204000 | 0.051241000  |
| N | 3.857303000  | -3.280306000 | 0.364943000  |
| C | 3.697253000  | -4.635731000 | 0.361797000  |
| C | 4.950231000  | -5.218263000 | 0.380848000  |
| C | 5.859982000  | -4.149310000 | 0.372900000  |
| N | 5.210711000  | -2.979613000 | 0.350141000  |
| N | -3.535720000 | -3.484924000 | 0.343712000  |
| C | -3.296611000 | -4.828297000 | 0.319981000  |
| C | -4.515030000 | -5.480027000 | 0.327142000  |
| C | -5.481600000 | -4.459762000 | 0.332839000  |
| N | -4.899206000 | -3.258045000 | 0.329979000  |
| H | 6.940227000  | -4.159702000 | 0.369228000  |
| H | 5.173734000  | -6.274370000 | 0.389573000  |
| H | 2.723191000  | -5.089779000 | 0.311149000  |
| H | -2.297922000 | -5.225706000 | 0.267015000  |
| H | -4.680196000 | -6.546885000 | 0.319791000  |
| H | -6.559763000 | -4.532422000 | 0.326867000  |

|    |               |              |              |
|----|---------------|--------------|--------------|
| Ru | -5.427463000  | -1.256557000 | 0.026537000  |
| C  | -5.286314000  | -1.906534000 | -4.331130000 |
| C  | -4.925140000  | -1.682204000 | -3.007067000 |
| N  | -5.823310000  | -1.593214000 | -2.006191000 |
| C  | -7.158422000  | -1.728966000 | -2.309927000 |
| C  | -7.577207000  | -1.955601000 | -3.623453000 |
| C  | -6.637834000  | -2.046577000 | -4.646412000 |
| C  | -8.091241000  | -1.616552000 | -1.170740000 |
| C  | -9.483580000  | -1.732370000 | -1.206435000 |
| C  | -10.199476000 | -1.596628000 | -0.014978000 |
| C  | -9.531722000  | -1.350284000 | 1.186770000  |
| C  | -8.138505000  | -1.242615000 | 1.171601000  |
| N  | -7.463942000  | -1.377438000 | 0.005163000  |
| C  | -7.251231000  | -0.991422000 | 2.325220000  |
| N  | -5.904411000  | -0.952649000 | 2.046471000  |
| C  | -5.045144000  | -0.723967000 | 3.059212000  |
| C  | -5.457819000  | -0.527761000 | 4.372671000  |
| C  | -6.821473000  | -0.567216000 | 4.663210000  |
| C  | -7.721098000  | -0.800605000 | 3.627076000  |
| H  | -4.516620000  | -1.969239000 | -5.092540000 |
| H  | -3.888021000  | -1.566966000 | -2.715403000 |
| H  | -8.633455000  | -2.059377000 | -3.842776000 |
| H  | -6.956779000  | -2.222405000 | -5.668476000 |
| H  | -10.005993000 | -1.924622000 | -2.136355000 |
| H  | -11.280695000 | -1.683802000 | -0.022811000 |
| H  | -10.091950000 | -1.247502000 | 2.108807000  |
| H  | -3.996588000  | -0.701011000 | 2.786883000  |
| H  | -4.718044000  | -0.348011000 | 5.144993000  |
| H  | -7.180220000  | -0.418470000 | 5.676339000  |
| H  | -8.785749000  | -0.833341000 | 3.826957000  |

Cartesian coordinates of DFT-optimized structure of **17** complex by B3LYP/Def2-TZVP;  
6-31G(d,p)/CH<sub>3</sub>CN, charge = 2, multiplicity = 1

|    |             |              |              |
|----|-------------|--------------|--------------|
| Os | 5.473418000 | 0.860289000  | -0.025549000 |
| N  | 5.362290000 | -1.223937000 | 0.276579000  |
| N  | 5.806119000 | 1.278220000  | 2.003647000  |
| N  | 7.487105000 | 1.217775000  | 0.019797000  |
| N  | 6.020411000 | 0.590834000  | -2.032951000 |
| C  | 4.888526000 | 1.283222000  | 2.998176000  |
| H  | 3.876500000 | 1.040542000  | 2.698354000  |
| C  | 5.204196000 | 1.575833000  | 4.317633000  |
| H  | 4.421294000 | 1.564254000  | 5.067991000  |
| C  | 6.526716000 | 1.879797000  | 4.647261000  |
| H  | 6.807750000 | 2.113752000  | 5.668666000  |
| C  | 7.483529000 | 1.875814000  | 3.638320000  |
| H  | 8.517577000 | 2.105643000  | 3.867307000  |
| C  | 7.117622000 | 1.574326000  | 2.323790000  |
| C  | 8.072431000 | 1.544368000  | 1.204670000  |
| C  | 9.443325000 | 1.805626000  | 1.253610000  |

|   |              |              |              |
|---|--------------|--------------|--------------|
| H | 9.927034000  | 2.067378000  | 2.187542000  |
| C | 10.190624000 | 1.724935000  | 0.076207000  |
| C | 9.571467000  | 1.388213000  | -1.129801000 |
| H | 10.154027000 | 1.327953000  | -2.041737000 |
| C | 8.198433000  | 1.134829000  | -1.137894000 |
| C | 7.364599000  | 0.774781000  | -2.295396000 |
| C | 7.869027000  | 0.623195000  | -3.589907000 |
| H | 8.926482000  | 0.773068000  | -3.773896000 |
| C | 7.018701000  | 0.281626000  | -4.635886000 |
| H | 7.406977000  | 0.163194000  | -5.641941000 |
| C | 5.661617000  | 0.095943000  | -4.363323000 |
| H | 4.958069000  | -0.171369000 | -5.144119000 |
| C | 5.207187000  | 0.258310000  | -3.062073000 |
| H | 4.163307000  | 0.125207000  | -2.805912000 |
| C | 6.424603000  | -2.059937000 | 0.343914000  |
| H | 7.397384000  | -1.582959000 | 0.372984000  |
| C | 6.320749000  | -3.434705000 | 0.364132000  |
| H | 7.204041000  | -4.060262000 | 0.417356000  |
| C | 5.041202000  | -4.009871000 | 0.278764000  |
| C | 3.930616000  | -3.163457000 | 0.223886000  |
| H | 2.941903000  | -3.577244000 | 0.108244000  |
| C | 4.086938000  | -1.768841000 | 0.262225000  |
| C | -3.016168000 | 0.770669000  | -0.215250000 |
| C | 3.003096000  | -0.775938000 | 0.187466000  |
| C | -3.517258000 | -0.524120000 | 0.023964000  |
| C | 3.505299000  | 0.522654000  | -0.049697000 |
| C | -2.637843000 | -1.586479000 | 0.256447000  |
| C | 2.621418000  | 1.585210000  | -0.287553000 |
| C | -1.246043000 | -1.392344000 | 0.383001000  |
| C | 1.232128000  | 1.388593000  | -0.417369000 |
| C | -0.718703000 | -0.104272000 | -0.004936000 |
| C | 0.705770000  | 0.098648000  | -0.030390000 |
| C | -1.612952000 | 0.967053000  | -0.364650000 |
| C | 1.599383000  | -0.972548000 | 0.331445000  |
| C | -1.029506000 | 2.145538000  | -0.930684000 |
| C | 1.014293000  | -2.150473000 | 0.897012000  |
| H | -1.668386000 | 2.874793000  | -1.412468000 |
| H | 1.651578000  | -2.879633000 | 1.380785000  |
| C | 0.318112000  | 2.350375000  | -0.951820000 |
| C | -0.333688000 | -2.354949000 | 0.916694000  |
| H | 0.698439000  | 3.233526000  | -1.449422000 |
| H | -0.715316000 | -3.238723000 | 1.412459000  |
| O | 4.987775000  | -5.355222000 | 0.246858000  |
| C | 3.709944000  | -6.012863000 | 0.164543000  |
| C | 3.925640000  | -7.533132000 | 0.151416000  |
| C | 2.532270000  | -8.186441000 | 0.065344000  |
| C | 4.766022000  | -7.936990000 | -1.074865000 |
| C | 4.629034000  | -7.978713000 | 1.447399000  |
| H | 3.099938000  | -5.718001000 | 1.028649000  |
| H | 3.199099000  | -5.690506000 | -0.752052000 |
| H | 2.627163000  | -9.278046000 | 0.051737000  |

|    |              |              |              |
|----|--------------|--------------|--------------|
| H  | 2.003203000  | -7.884617000 | -0.846898000 |
| H  | 1.908667000  | -7.915376000 | 0.926048000  |
| H  | 4.273833000  | -7.635388000 | -2.007887000 |
| H  | 4.901814000  | -9.024292000 | -1.103007000 |
| H  | 5.756388000  | -7.471326000 | -1.047423000 |
| H  | 4.037485000  | -7.707264000 | 2.330548000  |
| H  | 5.615735000  | -7.514418000 | 1.543654000  |
| H  | 4.763281000  | -9.066568000 | 1.454293000  |
| H  | 11.256364000 | 1.925182000  | 0.098397000  |
| N  | 3.308856000  | 2.831254000  | -0.402873000 |
| C  | 2.913505000  | 4.137140000  | -0.435826000 |
| C  | 4.045171000  | 4.930307000  | -0.452734000 |
| C  | 5.128115000  | 4.038597000  | -0.407385000 |
| N  | 4.693632000  | 2.773652000  | -0.364555000 |
| N  | -3.323646000 | -2.833804000 | 0.372600000  |
| N  | -4.704296000 | -2.772137000 | 0.355064000  |
| C  | -5.139341000 | -4.034288000 | 0.389470000  |
| C  | -4.057892000 | -4.931474000 | 0.409277000  |
| C  | -2.925807000 | -4.139140000 | 0.384822000  |
| C  | -4.099659000 | 1.769481000  | -0.282106000 |
| C  | -3.939022000 | 3.163004000  | -0.233897000 |
| C  | -5.051897000 | 4.008958000  | -0.280437000 |
| C  | -6.330269000 | 3.433723000  | -0.367288000 |
| C  | -6.430488000 | 2.056351000  | -0.357056000 |
| N  | -5.369005000 | 1.225449000  | -0.299462000 |
| O  | -4.998762000 | 5.354110000  | -0.239886000 |
| C  | -3.721542000 | 6.012262000  | -0.151740000 |
| C  | -3.938752000 | 7.532219000  | -0.128509000 |
| C  | -2.546179000 | 8.186354000  | -0.036244000 |
| C  | -4.640881000 | 7.985905000  | -1.422383000 |
| C  | -4.781156000 | 7.926979000  | 1.099345000  |
| H  | -6.201447000 | -4.233899000 | 0.385836000  |
| H  | -4.094300000 | -6.010260000 | 0.429864000  |
| H  | -1.886685000 | -4.415528000 | 0.342764000  |
| H  | -2.950034000 | 3.576623000  | -0.118449000 |
| H  | -7.214171000 | 4.059090000  | -0.413576000 |
| H  | -7.403237000 | 1.578066000  | -0.386574000 |
| H  | -3.110249000 | 5.724209000  | -1.017161000 |
| H  | -3.211372000 | 5.684082000  | 0.763145000  |
| H  | -2.018016000 | 7.878979000  | 0.874657000  |
| H  | -2.642177000 | 9.277753000  | -0.015532000 |
| H  | -1.921202000 | 7.921627000  | -0.897922000 |
| H  | -4.047810000 | 7.721157000  | -2.306555000 |
| H  | -4.776274000 | 9.073648000  | -1.422020000 |
| H  | -5.626971000 | 7.521273000  | -1.523203000 |
| H  | -4.289831000 | 7.619696000  | 2.030970000  |
| H  | -5.770971000 | 7.460439000  | 1.067506000  |
| H  | -4.918142000 | 9.013929000  | 1.134540000  |
| Ru | -5.467051000 | -0.854580000 | 0.014345000  |
| C  | -5.597545000 | -0.067003000 | 4.348098000  |
| C  | -5.160288000 | -0.233915000 | 3.038626000  |

|   |               |              |              |
|---|---------------|--------------|--------------|
| N | -5.984276000  | -0.573134000 | 2.027529000  |
| C | -7.318811000  | -0.761471000 | 2.304031000  |
| C | -7.812075000  | -0.608086000 | 3.602242000  |
| C | -6.948872000  | -0.257936000 | 4.636527000  |
| C | -8.166704000  | -1.130359000 | 1.152705000  |
| N | -7.475265000  | -1.212508000 | -0.008750000 |
| C | -8.065836000  | -1.543878000 | -1.181429000 |
| C | -9.436847000  | -1.812597000 | -1.219040000 |
| C | -10.169903000 | -1.731912000 | -0.032952000 |
| C | -9.539773000  | -1.389688000 | 1.165626000  |
| C | -7.119991000  | -1.574895000 | -2.315109000 |
| N | -5.811169000  | -1.277465000 | -2.011649000 |
| C | -4.903989000  | -1.283497000 | -3.008365000 |
| C | -5.229701000  | -1.580794000 | -4.327275000 |
| C | -6.553691000  | -1.886715000 | -4.641711000 |
| C | -7.502445000  | -1.881173000 | -3.623407000 |
| H | -4.119836000  | -0.097420000 | 2.768462000  |
| H | -4.885892000  | 0.206750000  | 5.119247000  |
| H | -7.325757000  | -0.137210000 | 5.646793000  |
| H | -8.866343000  | -0.761787000 | 3.800746000  |
| H | -10.112722000 | -1.330299000 | 2.083652000  |
| H | -11.235037000 | -1.937168000 | -0.042477000 |
| H | -9.930193000  | -2.079530000 | -2.146389000 |
| H | -8.538182000  | -2.112940000 | -3.842607000 |
| H | -6.844730000  | -2.124059000 | -5.659682000 |
| H | -4.454246000  | -1.570535000 | -5.085331000 |
| H | -3.889127000  | -1.038623000 | -2.718294000 |
| H | 4.079945000   | 6.008818000  | -0.484444000 |
| H | 1.874246000   | 4.414097000  | -0.410998000 |
| H | 6.189636000   | 4.238771000  | -0.390981000 |

Cartesian coordinates of DFT-optimized structure of **12ox** complex by B3LYP/Def2-TZVP;  
6-31G(d,p)/CH<sub>3</sub>CN, charge = 3, multiplicity = 2

|    |              |              |              |
|----|--------------|--------------|--------------|
| Ru | -5.501257000 | -0.053157000 | 0.014894000  |
| Os | 5.486605000  | 0.095074000  | -0.006564000 |
| N  | -5.060105000 | -2.093406000 | 0.295771000  |
| N  | 5.060350000  | 2.156334000  | -0.261995000 |
| N  | -5.993814000 | 0.242838000  | 2.033441000  |
| N  | 5.927031000  | -0.190287000 | -2.043773000 |
| N  | -7.553737000 | -0.089140000 | -0.024379000 |
| N  | 7.586978000  | 0.115015000  | -0.074786000 |
| N  | -5.906076000 | -0.365439000 | -2.022223000 |
| N  | 6.050262000  | 0.398174000  | 1.996698000  |
| N  | -5.124748000 | 2.002579000  | -0.251933000 |
| N  | 5.117624000  | -1.973671000 | 0.275513000  |
| C  | -5.133056000 | 0.409180000  | 3.057255000  |
| C  | 5.004077000  | -0.345361000 | -3.019739000 |
| H  | 3.969208000  | -0.307088000 | -2.705595000 |
| C  | -5.548066000 | 0.601390000  | 4.370514000  |

|   |               |              |              |
|---|---------------|--------------|--------------|
| C | 5.348948000   | -0.541011000 | -4.350694000 |
| H | 4.564402000   | -0.659028000 | -5.089315000 |
| C | -6.914296000  | 0.624348000  | 4.649012000  |
| C | 6.697224000   | -0.580288000 | -4.703285000 |
| C | -7.814869000  | 0.453880000  | 3.601473000  |
| C | 7.655422000   | -0.420780000 | -3.706986000 |
| H | -8.881508000  | 0.467604000  | 3.792202000  |
| C | -7.342911000  | 0.264256000  | 2.300514000  |
| C | 7.260499000   | -0.225909000 | -2.383280000 |
| C | -8.231017000  | 0.074655000  | 1.135581000  |
| C | 8.205364000   | -0.047132000 | -1.268077000 |
| C | -9.628366000  | 0.049830000  | 1.135701000  |
| C | 9.599895000   | -0.029533000 | -1.339066000 |
| H | -10.191722000 | 0.178812000  | 2.052337000  |
| H | 10.113003000  | -0.155017000 | -2.284744000 |
| C | -10.295730000 | -0.146228000 | -0.075278000 |
| C | 10.329363000  | 0.155706000  | -0.163577000 |
| C | -9.576525000  | -0.314164000 | -1.260458000 |
| C | 9.672691000   | 0.321646000  | 1.056683000  |
| C | -8.180203000  | -0.281482000 | -1.208154000 |
| C | 8.276576000   | 0.298791000  | 1.075552000  |
| C | -7.242645000  | -0.437371000 | -2.338686000 |
| C | 7.401914000   | 0.459248000  | 2.249139000  |
| C | -7.659043000  | -0.644553000 | -3.655730000 |
| C | 7.878655000   | 0.662687000  | 3.544292000  |
| H | -8.716726000  | -0.698623000 | -3.885062000 |
| C | -6.715051000  | -0.781784000 | -4.669364000 |
| C | 6.984465000   | 0.806482000  | 4.600573000  |
| C | -5.361867000  | -0.707170000 | -4.340967000 |
| C | 5.617048000   | 0.742497000  | 4.335953000  |
| H | 4.880222000   | 0.847694000  | 5.124027000  |
| C | -5.002859000  | -0.499025000 | -3.013597000 |
| C | 5.189877000   | 0.538423000  | 3.030303000  |
| H | 4.137696000   | 0.480948000  | 2.783973000  |
| C | -5.957375000  | -3.100200000 | 0.317529000  |
| C | 5.958246000   | 3.163858000  | -0.295477000 |
| H | -7.000852000  | -2.805993000 | 0.321776000  |
| H | 7.001064000   | 2.871402000  | -0.326881000 |
| C | -5.611111000  | -4.437279000 | 0.322067000  |
| C | 5.608911000   | 4.499191000  | -0.282384000 |
| H | -6.369633000  | -5.211098000 | 0.340082000  |
| H | 6.366581000   | 5.273063000  | -0.312431000 |
| C | -4.249186000  | -4.775032000 | 0.265463000  |
| C | 4.248611000   | 4.835550000  | -0.195229000 |
| C | -3.304749000  | -3.742223000 | 0.248117000  |
| C | 3.304191000   | 3.799085000  | -0.164784000 |
| H | -2.255184000  | -3.970393000 | 0.151848000  |
| H | 2.256520000   | 4.024394000  | -0.046126000 |
| C | -3.717093000  | -2.402792000 | 0.304651000  |
| C | 3.714575000   | 2.464484000  | -0.237801000 |
| C | -2.830869000  | -1.224358000 | 0.269771000  |

|   |              |              |              |
|---|--------------|--------------|--------------|
| C | 2.820343000  | 1.288234000  | -0.185993000 |
| C | -3.544410000 | -0.021190000 | 0.044609000  |
| C | 3.521775000  | 0.075183000  | 0.036403000  |
| C | -2.865519000 | 1.202861000  | -0.174478000 |
| C | 2.852542000  | -1.153065000 | 0.271502000  |
| C | -3.785478000 | 2.354412000  | -0.230707000 |
| C | 3.771532000  | -2.311439000 | 0.303394000  |
| C | -3.427742000 | 3.700737000  | -0.169153000 |
| C | 3.401662000  | -3.651099000 | 0.262957000  |
| H | -2.395737000 | 4.000864000  | -0.055995000 |
| H | 2.364127000  | -3.942539000 | 0.189611000  |
| C | -4.402379000 | 4.709246000  | -0.208571000 |
| C | 4.369646000  | -4.671161000 | 0.274238000  |
| C | -5.749840000 | 4.334503000  | -0.292583000 |
| C | 5.722143000  | -4.309373000 | 0.309177000  |
| H | -6.556858000 | 5.053910000  | -0.330534000 |
| H | 6.523234000  | -5.035698000 | 0.325694000  |
| C | -6.046231000 | 2.977666000  | -0.294250000 |
| C | 6.032716000  | -2.956995000 | 0.291781000  |
| H | -7.080340000 | 2.652760000  | -0.320910000 |
| H | 7.069713000  | -2.642685000 | 0.282085000  |
| C | -1.458189000 | 1.202201000  | -0.327081000 |
| C | 1.448672000  | -1.143693000 | 0.440558000  |
| C | -0.718239000 | 0.021369000  | 0.054536000  |
| C | 0.712568000  | 0.041826000  | 0.054080000  |
| C | -1.424355000 | -1.180683000 | 0.434099000  |
| C | 1.415097000  | 1.246547000  | -0.336564000 |
| C | -0.654708000 | -2.236790000 | 1.022196000  |
| C | 0.641841000  | 2.305855000  | -0.913502000 |
| H | -1.165509000 | -3.043732000 | 1.532865000  |
| H | 1.148138000  | 3.114724000  | -1.425172000 |
| C | 0.707047000  | -2.221370000 | 1.023762000  |
| C | -0.719525000 | 2.283349000  | -0.908841000 |
| H | 1.237951000  | -3.014252000 | 1.535131000  |
| H | -1.254775000 | 3.078538000  | -1.412441000 |
| O | -3.956583000 | -6.087426000 | 0.223122000  |
| O | 3.903565000  | -5.927597000 | 0.242485000  |
| O | 3.953879000  | 6.142158000  | -0.139215000 |
| O | -3.950298000 | 5.975193000  | -0.152406000 |
| C | -4.898712000 | 7.060472000  | -0.171452000 |
| C | -4.142920000 | 8.394572000  | -0.094977000 |
| C | -5.202765000 | 9.513633000  | -0.108646000 |
| C | -3.212646000 | 8.545707000  | -1.313470000 |
| C | -3.327212000 | 8.468630000  | 1.209643000  |
| C | 2.577829000  | 6.564917000  | -0.038162000 |
| C | 2.523536000  | 8.099226000  | -0.028845000 |
| C | 1.039346000  | 8.495138000  | 0.098285000  |
| C | 3.313346000  | 8.650590000  | 1.173343000  |
| C | 3.100446000  | 8.655805000  | -1.344310000 |
| C | -2.581721000 | -6.509264000 | 0.146831000  |
| C | -2.525903000 | -8.043971000 | 0.146123000  |

|   |              |               |              |
|---|--------------|---------------|--------------|
| C | -3.122496000 | -8.593916000  | 1.455612000  |
| C | -3.298182000 | -8.601780000  | -1.064462000 |
| C | -1.040560000 | -8.441695000  | 0.043185000  |
| C | 4.839550000  | -7.027508000  | 0.239550000  |
| C | 4.063708000  | -8.351118000  | 0.198916000  |
| C | 3.208987000  | -8.426480000  | -1.080369000 |
| C | 3.168947000  | -8.478486000  | 1.446365000  |
| C | 5.109969000  | -9.483138000  | 0.191972000  |
| H | -5.579204000 | 6.953244000   | 0.682911000  |
| H | -5.485181000 | 7.004718000   | -1.097442000 |
| H | -5.881871000 | 9.432517000   | 0.748726000  |
| H | -5.805271000 | 9.484089000   | -1.024576000 |
| H | -4.716730000 | 10.494440000  | -0.059240000 |
| H | -3.780935000 | 8.507596000   | -2.251170000 |
| H | -2.459783000 | 7.751024000   | -1.340495000 |
| H | -2.689331000 | 9.508103000   | -1.276731000 |
| H | -3.977699000 | 8.374872000   | 2.088102000  |
| H | -2.806195000 | 9.430486000   | 1.278858000  |
| H | -2.577247000 | 7.672329000   | 1.256200000  |
| H | 2.019729000  | 6.165034000   | -0.894105000 |
| H | 2.149102000  | 6.157695000   | 0.886174000  |
| H | 0.939922000  | 9.586299000   | 0.107578000  |
| H | 0.599612000  | 8.110857000   | 1.026756000  |
| H | 0.448185000  | 8.112668000   | -0.742657000 |
| H | 2.910104000  | 8.269481000   | 2.119700000  |
| H | 3.252426000  | 9.744636000   | 1.198393000  |
| H | 4.370197000  | 8.370788000   | 1.116826000  |
| H | 2.539471000  | 8.283765000   | -2.210633000 |
| H | 4.149630000  | 8.369525000   | -1.470248000 |
| H | 3.044044000  | 9.750262000   | -1.352375000 |
| H | -2.035202000 | -6.105512000  | 1.008955000  |
| H | -2.135725000 | -6.107229000  | -0.772119000 |
| H | -2.573501000 | -8.218413000  | 2.328162000  |
| H | -3.067883000 | -9.688480000  | 1.469972000  |
| H | -4.172783000 | -8.305018000  | 1.564907000  |
| H | -4.355516000 | -8.321131000  | -1.024487000 |
| H | -3.237173000 | -9.696016000  | -1.083409000 |
| H | -2.881409000 | -8.225319000  | -2.006864000 |
| H | -0.461441000 | -8.054413000  | 0.890331000  |
| H | -0.586880000 | -8.063146000  | -0.880969000 |
| H | -0.941090000 | -9.532961000  | 0.041849000  |
| H | 5.455128000  | -6.969529000  | 1.145793000  |
| H | 5.491442000  | -6.933495000  | -0.637889000 |
| H | 2.673390000  | -9.381691000  | -1.124076000 |
| H | 3.834526000  | -8.350442000  | -1.978394000 |
| H | 2.468450000  | -7.620664000  | -1.113179000 |
| H | 2.426325000  | -7.674853000  | 1.487975000  |
| H | 3.765572000  | -8.438125000  | 2.366149000  |
| H | 2.633582000  | -9.434787000  | 1.434867000  |
| H | 5.763937000  | -9.418693000  | -0.686047000 |
| H | 4.610155000  | -10.457835000 | 0.166370000  |

|   |               |              |              |
|---|---------------|--------------|--------------|
| H | 5.739647000   | -9.453029000 | 1.089407000  |
| H | -4.807228000  | 0.729677000  | 5.151886000  |
| H | -7.274518000  | 0.771721000  | 5.661734000  |
| H | -4.082120000  | 0.383959000  | 2.795749000  |
| H | -10.099236000 | -0.465947000 | -2.197542000 |
| H | -11.380022000 | -0.168364000 | -0.095344000 |
| H | -7.032158000  | -0.943194000 | -5.694308000 |
| H | -4.588496000  | -0.807713000 | -5.094422000 |
| H | -3.964033000  | -0.433753000 | -2.713586000 |
| H | 6.999671000   | -0.731584000 | -5.733788000 |
| H | 8.709679000   | -0.448108000 | -3.954541000 |
| H | 11.413077000  | 0.171440000  | -0.198900000 |
| H | 10.240952000  | 0.465355000  | 1.967606000  |
| H | 8.946279000   | 0.708496000  | 3.722060000  |
| H | 7.350065000   | 0.964710000  | 5.609315000  |

Cartesian coordinates of DFT-optimized structure of **13ox** complex by B3LYP/Def2-TZVP; 6-31G(d,p)/CH<sub>3</sub>CN, charge = 3, multiplicity = 2

|    |              |              |              |
|----|--------------|--------------|--------------|
| Ru | 4.965342000  | -0.358095000 | -0.208565000 |
| N  | 5.465851000  | 0.165107000  | 1.766057000  |
| N  | 7.014801000  | -0.457134000 | -0.238225000 |
| N  | 5.355851000  | -0.924279000 | -2.196095000 |
| C  | 4.613474000  | 0.476207000  | 2.761157000  |
| H  | 3.560951000  | 0.447424000  | 2.506293000  |
| C  | 5.038033000  | 0.814717000  | 4.041975000  |
| H  | 4.303644000  | 1.056477000  | 4.802188000  |
| C  | 6.404758000  | 0.833962000  | 4.314663000  |
| H  | 6.772770000  | 1.093290000  | 5.301750000  |
| C  | 7.296905000  | 0.512811000  | 3.295081000  |
| H  | 8.364074000  | 0.519784000  | 3.482875000  |
| C  | 6.815064000  | 0.181024000  | 2.027280000  |
| C  | 7.695056000  | -0.171966000 | 0.893485000  |
| C  | 9.091379000  | -0.231779000 | 0.899553000  |
| H  | 9.658822000  | -0.008052000 | 1.795068000  |
| C  | 9.751053000  | -0.589457000 | -0.277811000 |
| C  | 9.026246000  | -0.880173000 | -1.435146000 |
| H  | 9.543368000  | -1.156365000 | -2.346350000 |
| C  | 7.631426000  | -0.804997000 | -1.388703000 |
| C  | 6.689136000  | -1.069825000 | -2.496149000 |
| C  | 7.099948000  | -1.444619000 | -3.776908000 |
| H  | 8.155607000  | -1.554153000 | -3.995435000 |
| C  | 6.151933000  | -1.676723000 | -4.769887000 |
| H  | 6.464574000  | -1.968840000 | -5.766857000 |
| C  | 4.801876000  | -1.526197000 | -4.457871000 |
| H  | 4.025963000  | -1.694875000 | -5.196251000 |
| C  | 4.449080000  | -1.150251000 | -3.165766000 |
| H  | 3.412032000  | -1.020481000 | -2.880672000 |
| C  | -3.300169000 | 1.215969000  | -0.424194000 |
| C  | 2.248799000  | -1.392031000 | 0.161887000  |

|    |               |              |              |
|----|---------------|--------------|--------------|
| C  | -4.051979000  | 0.078263000  | -0.075183000 |
| C  | 3.006387000   | -0.263447000 | -0.180067000 |
| C  | -3.403588000  | -1.127302000 | 0.252834000  |
| C  | 2.351489000   | 0.933437000  | -0.501250000 |
| C  | -2.005932000  | -1.194871000 | 0.364496000  |
| C  | 0.951069000   | 1.006186000  | -0.612958000 |
| C  | -1.243143000  | -0.057847000 | -0.117201000 |
| C  | 0.184158000   | -0.126946000 | -0.138416000 |
| C  | -1.906492000  | 1.148256000  | -0.577636000 |
| C  | 0.851790000   | -1.329494000 | 0.314875000  |
| C  | -1.112753000  | 2.164405000  | -1.200805000 |
| C  | 0.061675000   | -2.346157000 | 0.941762000  |
| H  | -1.597018000  | 2.971232000  | -1.734394000 |
| H  | 0.550284000   | -3.153869000 | 1.470412000  |
| C  | 0.244596000   | 2.095218000  | -1.217756000 |
| C  | -1.295916000  | -2.283904000 | 0.965164000  |
| H  | 0.793040000   | 2.852648000  | -1.761921000 |
| H  | -1.839801000  | -3.041030000 | 1.513936000  |
| H  | 10.834390000  | -0.641855000 | -0.293482000 |
| N  | -4.332835000  | -2.182923000 | 0.473122000  |
| N  | -5.677688000  | -1.839297000 | 0.448387000  |
| C  | -6.361697000  | -2.976663000 | 0.589641000  |
| C  | -5.486553000  | -4.071322000 | 0.687848000  |
| C  | -4.217703000  | -3.538054000 | 0.596513000  |
| H  | -7.441775000  | -2.953663000 | 0.603305000  |
| H  | -5.745730000  | -5.112787000 | 0.800639000  |
| H  | -3.260629000  | -4.029505000 | 0.578523000  |
| Os | -6.014495000  | 0.173469000  | -0.045467000 |
| C  | -5.894503000  | 1.273472000  | 4.210584000  |
| C  | -5.542690000  | 0.919115000  | 2.914202000  |
| N  | -6.458985000  | 0.709818000  | 1.944003000  |
| C  | -7.792218000  | 0.850713000  | 2.250579000  |
| C  | -8.195003000  | 1.204330000  | 3.538159000  |
| C  | -7.243023000  | 1.419646000  | 4.530521000  |
| C  | -8.730938000  | 0.604595000  | 1.141909000  |
| N  | -8.111521000  | 0.275522000  | -0.013601000 |
| C  | -8.794674000  | 0.010042000  | -1.149376000 |
| C  | -10.189775000 | 0.071337000  | -1.154324000 |
| C  | -10.849604000 | 0.409164000  | 0.027888000  |
| C  | -10.124588000 | 0.679405000  | 1.189117000  |
| C  | -7.918326000  | -0.324651000 | -2.285562000 |
| N  | -6.569046000  | -0.314541000 | -2.019684000 |
| C  | -5.707243000  | -0.610764000 | -3.016802000 |
| C  | -6.130937000  | -0.927470000 | -4.301374000 |
| C  | -7.496340000  | -0.941262000 | -4.580153000 |
| C  | -8.392387000  | -0.635663000 | -3.559802000 |
| H  | -4.506992000  | 0.793748000  | 2.626780000  |
| H  | -5.114932000  | 1.428842000  | 4.947478000  |
| H  | -7.551188000  | 1.695431000  | 5.533124000  |
| H  | -9.249591000  | 1.310480000  | 3.761537000  |
| H  | -10.639509000 | 0.940473000  | 2.105510000  |

|   |               |              |              |
|---|---------------|--------------|--------------|
| H | -11.932612000 | 0.462020000  | 0.044299000  |
| H | -10.755122000 | -0.137014000 | -2.054350000 |
| H | -9.458575000  | -0.638402000 | -3.751004000 |
| H | -7.860067000  | -1.184397000 | -5.572536000 |
| H | -5.392844000  | -1.156999000 | -5.061255000 |
| H | -4.656037000  | -0.587143000 | -2.761051000 |
| N | -4.129151000  | 2.356846000  | -0.618025000 |
| N | -5.499575000  | 2.144904000  | -0.552265000 |
| C | -6.074304000  | 3.343284000  | -0.674722000 |
| C | -5.100734000  | 4.348276000  | -0.800998000 |
| C | -3.887247000  | 3.694645000  | -0.747021000 |
| H | -2.887024000  | 4.091197000  | -0.758639000 |
| H | -5.261228000  | 5.410075000  | -0.907621000 |
| H | -7.151458000  | 3.424892000  | -0.655819000 |
| N | 3.075719000   | -2.535280000 | 0.360811000  |
| C | 2.834683000   | -3.874141000 | 0.484002000  |
| C | 4.050883000   | -4.522602000 | 0.551235000  |
| C | 5.020324000   | -3.509608000 | 0.438952000  |
| N | 4.442390000   | -2.314837000 | 0.311665000  |
| N | 3.278633000   | 1.991895000  | -0.725885000 |
| N | 4.618534000   | 1.640644000  | -0.716185000 |
| C | 5.305022000   | 2.774275000  | -0.862120000 |
| C | 4.434913000   | 3.876163000  | -0.947741000 |
| C | 3.164333000   | 3.347913000  | -0.844120000 |
| H | 1.835963000   | -4.274927000 | 0.481753000  |
| H | 4.214866000   | -5.584311000 | 0.656481000  |
| H | 6.098106000   | -3.586356000 | 0.430633000  |
| H | 2.209412000   | 3.843146000  | -0.813446000 |
| H | 4.697365000   | 4.917244000  | -1.059386000 |
| H | 6.384965000   | 2.746733000  | -0.885280000 |

Cartesian coordinates of DFT-optimized structure of **14ox** complex by B3LYP/Def2-TZVP;  
6-31G(d,p)/CH<sub>3</sub>CN, charge = 3, multiplicity = 2

|    |             |              |              |
|----|-------------|--------------|--------------|
| Ru | 4.757149000 | -0.222118000 | -0.203062000 |
| N  | 5.288475000 | 0.688820000  | 1.615488000  |
| N  | 6.803758000 | -0.311786000 | -0.257082000 |
| N  | 5.111463000 | -1.170654000 | -2.045571000 |
| C  | 4.453592000 | 1.189833000  | 2.546091000  |
| H  | 3.396494000 | 1.104554000  | 2.324854000  |
| C  | 4.900360000 | 1.783682000  | 3.722132000  |
| H  | 4.179000000 | 2.169409000  | 4.433916000  |
| C  | 6.272205000 | 1.867864000  | 3.954353000  |
| H  | 6.657582000 | 2.324552000  | 4.859925000  |
| C  | 7.146656000 | 1.353862000  | 3.000649000  |
| H  | 8.217347000 | 1.407767000  | 3.158441000  |
| C  | 6.642710000 | 0.767630000  | 1.837774000  |
| C  | 7.503610000 | 0.199137000  | 0.779786000  |
| C  | 8.900326000 | 0.150207000  | 0.767599000  |
| H  | 9.483148000 | 0.552256000  | 1.587764000  |

|    |               |              |              |
|----|---------------|--------------|--------------|
| C  | 9.540435000   | -0.431850000 | -0.328365000 |
| C  | 8.795822000   | -0.952944000 | -1.388361000 |
| H  | 9.297893000   | -1.402955000 | -2.236592000 |
| C  | 7.401438000   | -0.879424000 | -1.327704000 |
| C  | 6.440073000   | -1.366457000 | -2.338628000 |
| C  | 6.829539000   | -1.988210000 | -3.526733000 |
| H  | 7.881701000   | -2.134504000 | -3.740287000 |
| C  | 5.864977000   | -2.418417000 | -4.433879000 |
| H  | 6.161120000   | -2.901979000 | -5.358865000 |
| C  | 4.519798000   | -2.215337000 | -4.130285000 |
| H  | 3.731342000   | -2.531912000 | -4.804002000 |
| C  | 4.188630000   | -1.591113000 | -2.931963000 |
| H  | 3.156041000   | -1.414002000 | -2.656269000 |
| C  | -3.543740000  | 1.273289000  | -0.486071000 |
| C  | 2.055643000   | -1.181136000 | 0.419240000  |
| C  | -4.262524000  | 0.164459000  | 0.025318000  |
| C  | 2.793191000   | -0.136719000 | -0.151750000 |
| C  | -3.616778000  | -1.004451000 | 0.500854000  |
| C  | 2.119544000   | 0.967855000  | -0.687817000 |
| C  | -2.206961000  | -1.001847000 | 0.621873000  |
| C  | 0.714101000   | 1.009750000  | -0.777897000 |
| C  | -1.459024000  | 0.043194000  | -0.046329000 |
| C  | -0.029506000  | -0.017063000 | -0.081654000 |
| C  | -2.147840000  | 1.150157000  | -0.677870000 |
| C  | 0.658005000   | -1.104133000 | 0.579551000  |
| C  | -1.378787000  | 2.028352000  | -1.506932000 |
| C  | -0.113915000  | -1.986762000 | 1.399391000  |
| H  | -1.890012000  | 2.723210000  | -2.160626000 |
| H  | 0.388561000   | -2.669385000 | 2.072263000  |
| C  | -0.020261000  | 1.958283000  | -1.557902000 |
| C  | -1.474487000  | -1.941018000 | 1.416672000  |
| H  | 0.504198000   | 2.600398000  | -2.253323000 |
| H  | -2.008580000  | -2.587760000 | 2.101011000  |
| H  | 10.623747000  | -0.479563000 | -0.356442000 |
| Os | -6.226671000  | 0.250654000  | 0.077216000  |
| C  | -6.063731000  | 1.788882000  | 4.186855000  |
| C  | -5.728006000  | 1.297970000  | 2.931866000  |
| N  | -6.657275000  | 0.986284000  | 2.000739000  |
| C  | -7.987162000  | 1.161226000  | 2.307959000  |
| C  | -8.373020000  | 1.650340000  | 3.556125000  |
| C  | -7.408561000  | 1.968421000  | 4.507499000  |
| C  | -8.938324000  | 0.799781000  | 1.243084000  |
| N  | -8.328078000  | 0.348798000  | 0.122255000  |
| C  | -9.024224000  | -0.037948000 | -0.972008000 |
| C  | -10.419439000 | 0.023261000  | -0.969360000 |
| C  | -11.067878000 | 0.486653000  | 0.176284000  |
| C  | -10.331539000 | 0.879091000  | 1.295156000  |
| C  | -8.157526000  | -0.498777000 | -2.069745000 |
| N  | -6.805841000  | -0.462616000 | -1.814955000 |
| C  | -5.951785000  | -0.881344000 | -2.775759000 |
| C  | -6.385785000  | -1.342398000 | -4.011762000 |

|   |               |              |              |
|---|---------------|--------------|--------------|
| C | -7.753375000  | -1.379108000 | -4.280243000 |
| C | -8.641038000  | -0.953480000 | -3.296800000 |
| H | -4.696239000  | 1.142950000  | 2.644656000  |
| H | -5.274926000  | 2.021831000  | 4.892876000  |
| H | -7.703677000  | 2.348575000  | 5.479417000  |
| H | -9.424711000  | 1.781470000  | 3.780263000  |
| H | -10.837983000 | 1.237058000  | 2.183162000  |
| H | -12.150691000 | 0.541363000  | 0.197636000  |
| H | -10.993614000 | -0.282453000 | -1.835466000 |
| H | -9.708643000  | -0.974000000 | -3.479023000 |
| H | -8.124380000  | -1.732719000 | -5.236046000 |
| H | -5.653916000  | -1.664272000 | -4.743704000 |
| H | -4.899222000  | -0.835899000 | -2.528817000 |
| N | 2.899346000   | -2.255666000 | 0.823404000  |
| C | 2.676839000   | -3.545579000 | 1.214787000  |
| C | 3.901653000   | -4.157473000 | 1.386052000  |
| C | 4.856796000   | -3.178609000 | 1.056953000  |
| N | 4.262711000   | -2.037826000 | 0.706031000  |
| N | 3.031044000   | 1.966700000  | -1.137202000 |
| N | 4.374959000   | 1.631974000  | -1.088763000 |
| C | 5.046256000   | 2.717622000  | -1.473885000 |
| C | 4.163259000   | 3.775295000  | -1.757641000 |
| C | 2.900681000   | 3.271147000  | -1.521843000 |
| H | 1.683483000   | -3.947839000 | 1.310949000  |
| H | 4.080230000   | -5.175864000 | 1.696199000  |
| H | 5.935118000   | -3.246065000 | 1.043063000  |
| H | 1.941975000   | 3.757545000  | -1.568943000 |
| H | 4.412708000   | 4.774750000  | -2.080262000 |
| H | 6.125724000   | 2.692152000  | -1.516296000 |
| C | -4.563959000  | -2.093910000 | 0.818805000  |
| C | -4.218998000  | -3.430233000 | 1.043771000  |
| C | -5.212249000  | -4.384604000 | 1.308389000  |
| C | -6.553240000  | -3.968831000 | 1.327791000  |
| C | -6.837829000  | -2.648378000 | 1.044813000  |
| N | -5.892994000  | -1.721129000 | 0.780788000  |
| O | -4.982689000  | -5.684572000 | 1.540765000  |
| C | -3.631392000  | -6.190638000 | 1.523782000  |
| C | -3.655408000  | -7.693383000 | 1.836952000  |
| C | -2.195079000  | -8.184767000 | 1.796992000  |
| C | -4.245966000  | -7.931188000 | 3.239762000  |
| C | -4.485138000  | -8.442644000 | 0.777046000  |
| C | -4.405356000  | 2.444234000  | -0.757576000 |
| N | -5.765862000  | 2.191829000  | -0.648055000 |
| C | -6.631153000  | 3.196586000  | -0.862666000 |
| C | -6.253636000  | 4.497566000  | -1.165391000 |
| C | -4.883989000  | 4.785799000  | -1.216994000 |
| C | -3.968000000  | 3.740220000  | -1.002569000 |
| O | -4.352987000  | 5.993837000  | -1.448918000 |
| C | -5.226150000  | 7.124193000  | -1.661880000 |
| C | -4.374665000  | 8.383511000  | -1.874205000 |
| C | -5.352845000  | 9.553918000  | -2.096819000 |

|   |              |              |              |
|---|--------------|--------------|--------------|
| C | -3.476841000 | 8.213091000  | -3.114287000 |
| C | -3.512443000 | 8.656418000  | -0.627129000 |
| H | -3.185193000 | -3.728810000 | 0.974121000  |
| H | -7.346240000 | -4.677359000 | 1.534896000  |
| H | -7.864101000 | -2.301838000 | 1.018179000  |
| H | -3.040112000 | -5.649356000 | 2.273172000  |
| H | -3.197697000 | -6.009828000 | 0.532249000  |
| H | -1.746587000 | -8.029621000 | 0.808204000  |
| H | -2.152752000 | -9.256840000 | 2.019119000  |
| H | -1.576036000 | -7.664355000 | 2.537839000  |
| H | -3.657680000 | -7.415024000 | 4.008602000  |
| H | -4.243892000 | -9.001161000 | 3.477120000  |
| H | -5.278044000 | -7.571551000 | 3.302454000  |
| H | -4.076976000 | -8.285045000 | -0.228978000 |
| H | -5.527250000 | -8.107396000 | 0.777501000  |
| H | -4.475126000 | -9.519921000 | 0.978704000  |
| H | -7.681696000 | 2.944112000  | -0.778495000 |
| H | -7.017044000 | 5.246582000  | -1.327726000 |
| H | -2.915707000 | 3.985147000  | -1.001383000 |
| H | -5.875400000 | 7.238984000  | -0.785028000 |
| H | -5.851084000 | 6.926715000  | -2.541781000 |
| H | -5.985476000 | 9.386253000  | -2.976952000 |
| H | -4.796717000 | 10.484373000 | -2.256882000 |
| H | -6.007883000 | 9.700480000  | -1.229379000 |
| H | -4.076401000 | 8.027290000  | -4.013949000 |
| H | -2.782261000 | 7.376082000  | -2.989768000 |
| H | -2.887297000 | 9.121149000  | -3.284877000 |
| H | -4.137528000 | 8.786710000  | 0.264921000  |
| H | -2.926081000 | 9.572274000  | -0.763244000 |
| H | -2.816446000 | 7.832999000  | -0.437099000 |

Cartesian coordinates of DFT-optimized structure of **15ox** complex by B3LYP/Def2-TZVP;  
6-31G(d,p)/CH<sub>3</sub>CN, charge = 3, multiplicity = 2

|    |             |              |              |
|----|-------------|--------------|--------------|
| Os | 4.738395000 | -0.227765000 | -0.204972000 |
| N  | 5.323604000 | 0.662134000  | 1.613907000  |
| N  | 6.831846000 | -0.322156000 | -0.261342000 |
| N  | 5.143542000 | -1.162344000 | -2.050333000 |
| C  | 4.481411000 | 1.158880000  | 2.546229000  |
| H  | 3.425272000 | 1.078191000  | 2.324416000  |
| C  | 4.929534000 | 1.741935000  | 3.724876000  |
| H  | 4.205836000 | 2.123126000  | 4.436172000  |
| C  | 6.300559000 | 1.821925000  | 3.962420000  |
| H  | 6.683444000 | 2.271099000  | 4.872369000  |
| C  | 7.177018000 | 1.313663000  | 3.008128000  |
| H  | 8.247124000 | 1.364237000  | 3.168280000  |
| C  | 6.678529000 | 0.736970000  | 1.840040000  |
| C  | 7.535039000 | 0.177395000  | 0.779790000  |
| C  | 8.930541000 | 0.126047000  | 0.766631000  |
| H  | 9.512190000 | 0.519316000  | 1.591328000  |

|    |               |              |              |
|----|---------------|--------------|--------------|
| C  | 9.569740000   | -0.445676000 | -0.334345000 |
| C  | 8.824104000   | -0.955114000 | -1.398302000 |
| H  | 9.323390000   | -1.397908000 | -2.251454000 |
| C  | 7.430929000   | -0.880939000 | -1.336781000 |
| C  | 6.472099000   | -1.358266000 | -2.348467000 |
| C  | 6.853590000   | -1.972023000 | -3.541456000 |
| H  | 7.904645000   | -2.118038000 | -3.758529000 |
| C  | 5.885266000   | -2.394262000 | -4.447662000 |
| H  | 6.176978000   | -2.871595000 | -5.376866000 |
| C  | 4.541707000   | -2.191337000 | -4.137560000 |
| H  | 3.749739000   | -2.501357000 | -4.809612000 |
| C  | 4.211478000   | -1.575942000 | -2.936672000 |
| H  | 3.180305000   | -1.400245000 | -2.659255000 |
| C  | -3.548914000  | 1.276335000  | -0.472839000 |
| C  | 2.040927000   | -1.191450000 | 0.426609000  |
| C  | -4.281873000  | 0.171714000  | 0.029581000  |
| C  | 2.776572000   | -0.139167000 | -0.152637000 |
| C  | -3.624410000  | -0.995017000 | 0.496074000  |
| C  | 2.107982000   | 0.975363000  | -0.695881000 |
| C  | -2.215331000  | -0.996928000 | 0.616179000  |
| C  | 0.708023000   | 1.014691000  | -0.782733000 |
| C  | -1.460770000  | 0.047319000  | -0.042770000 |
| C  | -0.034475000  | -0.015023000 | -0.079431000 |
| C  | -2.153581000  | 1.155659000  | -0.663804000 |
| C  | 0.649559000   | -1.107127000 | 0.587244000  |
| C  | -1.386409000  | 2.034738000  | -1.497172000 |
| C  | -0.127049000  | -1.990791000 | 1.404435000  |
| H  | -1.902061000  | 2.730812000  | -2.146427000 |
| H  | 0.371810000   | -2.670609000 | 2.082626000  |
| C  | -0.029641000  | 1.967559000  | -1.557361000 |
| C  | -1.485905000  | -1.937980000 | 1.415239000  |
| H  | 0.491008000   | 2.606353000  | -2.258396000 |
| H  | -2.025467000  | -2.582865000 | 2.097300000  |
| H  | 10.652688000  | -0.494549000 | -0.363163000 |
| Ru | -6.230893000  | 0.256040000  | 0.074319000  |
| C  | -6.040302000  | 1.852742000  | 4.175204000  |
| C  | -5.699118000  | 1.352393000  | 2.923218000  |
| N  | -6.615786000  | 1.016524000  | 1.993995000  |
| C  | -7.947293000  | 1.176746000  | 2.297606000  |
| C  | -8.345805000  | 1.675372000  | 3.539809000  |
| C  | -7.388355000  | 2.017371000  | 4.490549000  |
| C  | -8.899302000  | 0.790666000  | 1.235964000  |
| N  | -8.288713000  | 0.337552000  | 0.117750000  |
| C  | -8.979364000  | -0.067744000 | -0.971730000 |
| C  | -10.376456000 | -0.026702000 | -0.966216000 |
| C  | -11.028185000 | 0.437550000  | 0.178166000  |
| C  | -10.294513000 | 0.851389000  | 1.291946000  |
| C  | -8.106211000  | -0.522241000 | -2.073093000 |
| N  | -6.754565000  | -0.466858000 | -1.827001000 |
| C  | -5.907587000  | -0.869571000 | -2.794981000 |
| C  | -6.340067000  | -1.337255000 | -4.031294000 |

|   |               |              |              |
|---|---------------|--------------|--------------|
| C | -7.709126000  | -1.395282000 | -4.288561000 |
| C | -8.595281000  | -0.983149000 | -3.297399000 |
| H | -4.664415000  | 1.208833000  | 2.636736000  |
| H | -5.257012000  | 2.105375000  | 4.881180000  |
| H | -7.691580000  | 2.404827000  | 5.457484000  |
| H | -9.399871000  | 1.795608000  | 3.760601000  |
| H | -10.805672000 | 1.210606000  | 2.177237000  |
| H | -12.111901000 | 0.477008000  | 0.202141000  |
| H | -10.950559000 | -0.346958000 | -1.827607000 |
| H | -9.664003000  | -1.018835000 | -3.472814000 |
| H | -8.082735000  | -1.754102000 | -5.241818000 |
| H | -5.609816000  | -1.647495000 | -4.770397000 |
| H | -4.853611000  | -0.807714000 | -2.553045000 |
| N | 2.885251000   | -2.265370000 | 0.825936000  |
| C | 2.661457000   | -3.554275000 | 1.218980000  |
| C | 3.883344000   | -4.173212000 | 1.380849000  |
| C | 4.842902000   | -3.203348000 | 1.044417000  |
| N | 4.252212000   | -2.057970000 | 0.698515000  |
| N | 3.023431000   | 1.969802000  | -1.143193000 |
| N | 4.371261000   | 1.640129000  | -1.086562000 |
| C | 5.043451000   | 2.726844000  | -1.471383000 |
| C | 4.158510000   | 3.778467000  | -1.763495000 |
| C | 2.896143000   | 3.272651000  | -1.533119000 |
| H | 1.666592000   | -3.950364000 | 1.323937000  |
| H | 4.058358000   | -5.191996000 | 1.690695000  |
| H | 5.920492000   | -3.277037000 | 1.023524000  |
| H | 1.936955000   | 3.757044000  | -1.588508000 |
| H | 4.407607000   | 4.776713000  | -2.089108000 |
| H | 6.122990000   | 2.702985000  | -1.508548000 |
| C | -4.568831000  | -2.081642000 | 0.817530000  |
| C | -4.230509000  | -3.423658000 | 1.042343000  |
| C | -5.228033000  | -4.367602000 | 1.314802000  |
| C | -6.565880000  | -3.941544000 | 1.341881000  |
| C | -6.840135000  | -2.618158000 | 1.056850000  |
| N | -5.891786000  | -1.698986000 | 0.784847000  |
| O | -5.008607000  | -5.673518000 | 1.548825000  |
| C | -3.662666000  | -6.186127000 | 1.526064000  |
| C | -3.691600000  | -7.687990000 | 1.844593000  |
| C | -2.234275000  | -8.187469000 | 1.799462000  |
| C | -4.276599000  | -7.918247000 | 3.250963000  |
| C | -4.530361000  | -8.436947000 | 0.791650000  |
| C | -4.407202000  | 2.443741000  | -0.749710000 |
| N | -5.762818000  | 2.179852000  | -0.651501000 |
| C | -6.631962000  | 3.177883000  | -0.874054000 |
| C | -6.262998000  | 4.483207000  | -1.173932000 |
| C | -4.894885000  | 4.782558000  | -1.212767000 |
| C | -3.974804000  | 3.746529000  | -0.990373000 |
| O | -4.371868000  | 6.000474000  | -1.439639000 |
| C | -5.255560000  | 7.118399000  | -1.656597000 |
| C | -4.418556000  | 8.388877000  | -1.863092000 |
| C | -5.408342000  | 9.548550000  | -2.089520000 |

|   |              |              |              |
|---|--------------|--------------|--------------|
| C | -3.512025000 | 8.230740000  | -3.098432000 |
| C | -3.565863000 | 8.670415000  | -0.611388000 |
| H | -3.199556000 | -3.731221000 | 0.965165000  |
| H | -7.362740000 | -4.644538000 | 1.554411000  |
| H | -7.864479000 | -2.263915000 | 1.033073000  |
| H | -3.062157000 | -5.646442000 | 2.269826000  |
| H | -3.231184000 | -6.011990000 | 0.531925000  |
| H | -1.789676000 | -8.037808000 | 0.808020000  |
| H | -2.195899000 | -9.259047000 | 2.025015000  |
| H | -1.609043000 | -7.667558000 | 2.535538000  |
| H | -3.681702000 | -7.402753000 | 4.015223000  |
| H | -4.279549000 | -8.987429000 | 3.492173000  |
| H | -5.306129000 | -7.552126000 | 3.317246000  |
| H | -4.125770000 | -8.285655000 | -0.216833000 |
| H | -5.570274000 | -8.095050000 | 0.795338000  |
| H | -4.526049000 | -9.513581000 | 0.997309000  |
| H | -7.681823000 | 2.917711000  | -0.796874000 |
| H | -7.030348000 | 5.227242000  | -1.341950000 |
| H | -2.924111000 | 3.999612000  | -0.977498000 |
| H | -5.912974000 | 7.227281000  | -0.784570000 |
| H | -5.874197000 | 6.917023000  | -2.540548000 |
| H | -6.035058000 | 9.374284000  | -2.972649000 |
| H | -4.862410000 | 10.485638000 | -2.246433000 |
| H | -6.069215000 | 9.686950000  | -1.225125000 |
| H | -4.104715000 | 8.040369000  | -4.001738000 |
| H | -2.809791000 | 7.400528000  | -2.971638000 |
| H | -2.930975000 | 9.145227000  | -3.264311000 |
| H | -4.197143000 | 8.792819000  | 0.277466000  |
| H | -2.988814000 | 9.592897000  | -0.743199000 |
| H | -2.862251000 | 7.854242000  | -0.418352000 |

Cartesian coordinates of DFT-optimized structure of **16ox** complex by B3LYP/Def2-TZVP;  
6-31G(d,p)/CH<sub>3</sub>CN, charge = 3, multiplicity = 2

|    |              |              |              |
|----|--------------|--------------|--------------|
| Os | 5.590435000  | -0.947881000 | 0.037260000  |
| N  | 5.152323000  | 1.098247000  | -0.262039000 |
| N  | 6.070032000  | -1.244338000 | -1.992007000 |
| N  | 7.690794000  | -0.976550000 | 0.018949000  |
| N  | 6.112967000  | -0.582314000 | 2.043291000  |
| N  | -5.067875000 | 0.802771000  | -0.248977000 |
| C  | 5.168446000  | -1.358490000 | -2.992096000 |
| H  | 4.128014000  | -1.277569000 | -2.705674000 |
| C  | 5.541133000  | -1.570788000 | -4.313229000 |
| H  | 4.773141000  | -1.656669000 | -5.073330000 |
| C  | 6.895648000  | -1.666735000 | -4.628216000 |
| H  | 7.219754000  | -1.830419000 | -5.650192000 |
| C  | 7.832387000  | -1.546580000 | -3.605863000 |
| H  | 8.891088000  | -1.614566000 | -3.824687000 |
| C  | 7.409251000  | -1.336342000 | -2.293550000 |
| C  | 8.330599000  | -1.193994000 | -1.152854000 |

|   |              |              |              |
|---|--------------|--------------|--------------|
| C | 9.724999000  | -1.262132000 | -1.183682000 |
| H | 10.255655000 | -1.435700000 | -2.111904000 |
| C | 10.430135000 | -1.102675000 | 0.010182000  |
| C | 9.750371000  | -0.877006000 | 1.207910000  |
| H | 10.301095000 | -0.751708000 | 2.132116000  |
| C | 8.355259000  | -0.816452000 | 1.186190000  |
| C | 7.458512000  | -0.583089000 | 2.331407000  |
| C | 7.909721000  | -0.363419000 | 3.632864000  |
| H | 8.972813000  | -0.365339000 | 3.840743000  |
| C | 6.995425000  | -0.139831000 | 4.658055000  |
| H | 7.341472000  | 0.030217000  | 5.671761000  |
| C | 5.634691000  | -0.136019000 | 4.355754000  |
| H | 4.883333000  | 0.035878000  | 5.117886000  |
| C | 5.233507000  | -0.357599000 | 3.044553000  |
| H | 4.186912000  | -0.362992000 | 2.769366000  |
| C | 6.051372000  | 2.103561000  | -0.330303000 |
| H | 7.093056000  | 1.807125000  | -0.361110000 |
| C | 5.703405000  | 3.438610000  | -0.352565000 |
| H | 6.461742000  | 4.210242000  | -0.409762000 |
| C | 4.344088000  | 3.779639000  | -0.264884000 |
| C | 3.398099000  | 2.746722000  | -0.200556000 |
| H | 2.351923000  | 2.977424000  | -0.080731000 |
| C | 3.804913000  | 1.409344000  | -0.240872000 |
| C | -2.693138000 | -2.335655000 | 0.283656000  |
| C | 2.909684000  | 0.234935000  | -0.167319000 |
| C | -3.440453000 | -1.165453000 | 0.059048000  |
| C | 3.624880000  | -0.965605000 | 0.061190000  |
| C | -2.784525000 | 0.065026000  | -0.157064000 |
| C | 2.953901000  | -2.182267000 | 0.297762000  |
| C | -3.737081000 | 1.190917000  | -0.223637000 |
| C | -3.416767000 | 2.545914000  | -0.170621000 |
| H | -2.394248000 | 2.875174000  | -0.053792000 |
| C | -4.417657000 | 3.528000000  | -0.224051000 |
| C | -5.753872000 | 3.117385000  | -0.315223000 |
| H | -6.578932000 | 3.815344000  | -0.366378000 |
| C | -6.014350000 | 1.752857000  | -0.305922000 |
| H | -7.038946000 | 1.398963000  | -0.334753000 |
| C | -1.372326000 | 0.092552000  | -0.294268000 |
| C | 1.560651000  | -2.226010000 | 0.449777000  |
| C | -0.614818000 | -1.080168000 | 0.074770000  |
| C | 0.814621000  | -1.039739000 | 0.074493000  |
| C | -1.298181000 | -2.304326000 | 0.439349000  |
| C | 1.501441000  | 0.178306000  | -0.305200000 |
| C | -0.519088000 | -3.378859000 | 0.980020000  |
| C | 0.711913000  | 1.232808000  | -0.865549000 |
| H | -1.016967000 | -4.214360000 | 1.455339000  |
| H | 1.203971000  | 2.053880000  | -1.370649000 |
| C | 0.839774000  | -3.342839000 | 0.985600000  |
| C | -0.649358000 | 1.191345000  | -0.859088000 |
| H | 1.379143000  | -4.148001000 | 1.467626000  |
| H | -1.194566000 | 1.985053000  | -1.353681000 |

|   |              |              |              |
|---|--------------|--------------|--------------|
| O | 4.052776000  | 5.087858000  | -0.242470000 |
| O | -3.997471000 | 4.804453000  | -0.173615000 |
| C | -4.967837000 | 5.869393000  | -0.219415000 |
| C | -4.238688000 | 7.218130000  | -0.137127000 |
| C | -5.317613000 | 8.317640000  | -0.189270000 |
| C | -3.278943000 | 7.375188000  | -1.331748000 |
| C | -3.458223000 | 7.318663000  | 1.187251000  |
| C | 2.677707000  | 5.516657000  | -0.153870000 |
| C | 2.627393000  | 7.050546000  | -0.191215000 |
| C | 1.143812000  | 7.454801000  | -0.084072000 |
| C | 3.412777000  | 7.636331000  | 0.997507000  |
| C | 3.212039000  | 7.565861000  | -1.520030000 |
| H | -5.663219000 | 5.754844000  | 0.621933000  |
| H | -5.534211000 | 5.794700000  | -1.156550000 |
| H | -6.017559000 | 8.233719000  | 0.651027000  |
| H | -5.895776000 | 8.268222000  | -1.120030000 |
| H | -4.850511000 | 9.307554000  | -0.137793000 |
| H | -3.820230000 | 7.316749000  | -2.284148000 |
| H | -2.510813000 | 6.594967000  | -1.329096000 |
| H | -2.775538000 | 8.347945000  | -1.290455000 |
| H | -4.127951000 | 7.214141000  | 2.049864000  |
| H | -2.961917000 | 8.292933000  | 1.263640000  |
| H | -2.691240000 | 6.540494000  | 1.256717000  |
| H | 2.118709000  | 5.092065000  | -0.997263000 |
| H | 2.248195000  | 5.138624000  | 0.782386000  |
| H | 1.048410000  | 8.546005000  | -0.110477000 |
| H | 0.698873000  | 7.102269000  | 0.854390000  |
| H | 0.555239000  | 7.046909000  | -0.914929000 |
| H | 3.006374000  | 7.282388000  | 1.953028000  |
| H | 3.351325000  | 8.730632000  | 0.991021000  |
| H | 4.470014000  | 7.355878000  | 0.952726000  |
| H | 2.653788000  | 7.169390000  | -2.377228000 |
| H | 4.261017000  | 7.273486000  | -1.632344000 |
| H | 3.157826000  | 8.659744000  | -1.560676000 |
| H | 11.513362000 | -1.153304000 | 0.006871000  |
| N | 3.849966000  | -3.286967000 | 0.387721000  |
| C | 3.686528000  | -4.641673000 | 0.369409000  |
| C | 4.937125000  | -5.226522000 | 0.368157000  |
| C | 5.848584000  | -4.158681000 | 0.361096000  |
| N | 5.202257000  | -2.989414000 | 0.359987000  |
| N | -3.522149000 | -3.490237000 | 0.369559000  |
| C | -3.283660000 | -4.835180000 | 0.348857000  |
| C | -4.501781000 | -5.483993000 | 0.353604000  |
| C | -5.468479000 | -4.462004000 | 0.353301000  |
| N | -4.886364000 | -3.262086000 | 0.349356000  |
| H | 6.928798000  | -4.173132000 | 0.346776000  |
| H | 5.159561000  | -6.282462000 | 0.363858000  |
| H | 2.710857000  | -5.093742000 | 0.326265000  |
| H | -2.285634000 | -5.234952000 | 0.299172000  |
| H | -4.668802000 | -6.550452000 | 0.347081000  |
| H | -6.546537000 | -4.535059000 | 0.342839000  |

|    |               |              |              |
|----|---------------|--------------|--------------|
| Ru | -5.398204000  | -1.258573000 | 0.036363000  |
| C  | -5.236898000  | -1.917474000 | -4.319897000 |
| C  | -4.884417000  | -1.690545000 | -2.993648000 |
| N  | -5.789903000  | -1.600131000 | -2.000178000 |
| C  | -7.121961000  | -1.737125000 | -2.311814000 |
| C  | -7.532161000  | -1.965863000 | -3.627009000 |
| C  | -6.585643000  | -2.058228000 | -4.643619000 |
| C  | -8.063078000  | -1.624741000 | -1.178518000 |
| C  | -9.454849000  | -1.744739000 | -1.224800000 |
| C  | -10.178458000 | -1.610138000 | -0.038235000 |
| C  | -9.520230000  | -1.361335000 | 1.167881000  |
| C  | -8.127162000  | -1.249600000 | 1.160817000  |
| N  | -7.446763000  | -1.382631000 | 0.000106000  |
| C  | -7.248599000  | -0.994025000 | 2.321076000  |
| N  | -5.900753000  | -0.950837000 | 2.053097000  |
| C  | -5.049375000  | -0.717450000 | 3.070801000  |
| C  | -5.473034000  | -0.520317000 | 4.380897000  |
| C  | -6.838074000  | -0.564231000 | 4.660855000  |
| C  | -7.729270000  | -0.802731000 | 3.618261000  |
| H  | -4.461907000  | -1.981211000 | -5.075645000 |
| H  | -3.848973000  | -1.574856000 | -2.697147000 |
| H  | -8.586714000  | -2.070397000 | -3.853186000 |
| H  | -6.897880000  | -2.235774000 | -5.667373000 |
| H  | -9.970404000  | -1.939384000 | -2.157850000 |
| H  | -11.259298000 | -1.700410000 | -0.053303000 |
| H  | -10.086889000 | -1.259766000 | 2.085883000  |
| H  | -3.998620000  | -0.691059000 | 2.808459000  |
| H  | -4.739543000  | -0.336681000 | 5.158097000  |
| H  | -7.205158000  | -0.415052000 | 5.670839000  |
| H  | -8.795108000  | -0.838971000 | 3.810194000  |

Cartesian coordinates of DFT-optimized structure of **17ox** complex by B3LYP/Def2-TZVP;  
6-31G(d,p)/CH<sub>3</sub>CN, charge = 3, multiplicity = 2

|    |             |              |              |
|----|-------------|--------------|--------------|
| Os | 5.429809000 | 0.849766000  | -0.023629000 |
| N  | 5.355301000 | -1.241659000 | 0.285695000  |
| N  | 5.898977000 | 1.236641000  | 1.992332000  |
| N  | 7.496816000 | 1.223704000  | -0.055327000 |
| N  | 5.957914000 | 0.580011000  | -2.044151000 |
| C  | 5.014818000 | 1.206668000  | 3.013975000  |
| H  | 3.995328000 | 0.953961000  | 2.753109000  |
| C  | 5.379320000 | 1.480890000  | 4.326026000  |
| H  | 4.625790000 | 1.443249000  | 5.104318000  |
| C  | 6.707402000 | 1.796010000  | 4.608936000  |
| H  | 7.024653000 | 2.014101000  | 5.622888000  |
| C  | 7.627073000 | 1.823324000  | 3.564761000  |
| H  | 8.666228000 | 2.060267000  | 3.758117000  |
| C  | 7.212913000 | 1.542466000  | 2.262977000  |
| C  | 8.119944000 | 1.542512000  | 1.102271000  |
| C  | 9.487103000 | 1.826928000  | 1.102932000  |

|   |              |              |              |
|---|--------------|--------------|--------------|
| H | 10.003942000 | 2.083322000  | 2.019713000  |
| C | 10.182755000 | 1.775615000  | -0.105938000 |
| C | 9.520577000  | 1.444452000  | -1.288934000 |
| H | 10.063900000 | 1.404838000  | -2.225207000 |
| C | 8.152767000  | 1.167667000  | -1.237015000 |
| C | 7.279175000  | 0.795112000  | -2.362666000 |
| C | 7.729932000  | 0.651431000  | -3.674861000 |
| H | 8.773495000  | 0.826515000  | -3.906401000 |
| C | 6.840807000  | 0.281741000  | -4.679698000 |
| H | 7.186448000  | 0.168735000  | -5.701480000 |
| C | 5.505547000  | 0.059621000  | -4.346589000 |
| H | 4.774350000  | -0.231689000 | -5.091890000 |
| C | 5.103456000  | 0.217307000  | -3.026548000 |
| H | 4.075486000  | 0.057572000  | -2.728392000 |
| C | 6.414779000  | -2.077893000 | 0.334164000  |
| H | 7.390579000  | -1.607128000 | 0.341759000  |
| C | 6.302191000  | -3.452779000 | 0.363433000  |
| H | 7.182903000  | -4.082523000 | 0.402652000  |
| C | 5.019708000  | -4.021844000 | 0.306708000  |
| C | 3.909595000  | -3.166361000 | 0.266451000  |
| H | 2.916815000  | -3.575186000 | 0.171705000  |
| C | 4.080931000  | -1.778804000 | 0.295774000  |
| C | -3.000321000 | 0.790801000  | -0.190218000 |
| C | 2.995790000  | -0.775486000 | 0.237417000  |
| C | -3.500119000 | -0.509472000 | 0.038507000  |
| C | 3.491799000  | 0.529571000  | -0.008759000 |
| C | -2.615362000 | -1.576360000 | 0.281688000  |
| C | 2.617880000  | 1.610194000  | -0.239565000 |
| C | -1.234225000 | -1.373458000 | 0.432304000  |
| C | 1.232959000  | 1.412041000  | -0.370066000 |
| C | -0.705682000 | -0.082768000 | 0.044958000  |
| C | 0.709461000  | 0.121739000  | 0.028521000  |
| C | -1.601597000 | 0.988496000  | -0.328284000 |
| C | 1.604106000  | -0.958092000 | 0.401293000  |
| C | -1.020310000 | 2.167116000  | -0.896886000 |
| C | 1.017447000  | -2.132638000 | 0.978022000  |
| H | -1.660475000 | 2.890819000  | -1.384276000 |
| H | 1.653774000  | -2.851983000 | 1.476508000  |
| C | 0.325230000  | 2.375043000  | -0.911819000 |
| C | -0.327619000 | -2.332562000 | 0.989104000  |
| H | 0.711002000  | 3.254758000  | -1.410817000 |
| H | -0.718401000 | -3.207807000 | 1.492371000  |
| O | 4.954799000  | -5.360632000 | 0.287307000  |
| C | 3.670205000  | -6.016512000 | 0.234889000  |
| C | 3.882824000  | -7.536741000 | 0.232601000  |
| C | 2.485613000  | -8.185669000 | 0.177107000  |
| C | 4.700067000  | -7.954580000 | -1.004546000 |
| C | 4.607262000  | -7.971669000 | 1.520558000  |
| H | 3.080289000  | -5.709943000 | 1.108169000  |
| H | 3.146564000  | -5.699635000 | -0.675720000 |
| H | 2.577553000  | -9.277482000 | 0.173065000  |

|    |              |              |              |
|----|--------------|--------------|--------------|
| H  | 1.941987000  | -7.891838000 | -0.729133000 |
| H  | 1.877665000  | -7.904162000 | 1.045582000  |
| H  | 4.192839000  | -7.659638000 | -1.931526000 |
| H  | 4.830845000  | -9.042539000 | -1.024591000 |
| H  | 5.692917000  | -7.493385000 | -0.998734000 |
| H  | 4.032505000  | -7.689213000 | 2.411223000  |
| H  | 5.597549000  | -7.510911000 | 1.594692000  |
| H  | 4.737173000  | -9.059825000 | 1.535463000  |
| H  | 11.244767000 | 1.994050000  | -0.126113000 |
| N  | 3.304200000  | 2.851440000  | -0.349159000 |
| C  | 2.904921000  | 4.157514000  | -0.334162000 |
| C  | 4.033188000  | 4.951350000  | -0.347004000 |
| C  | 5.118650000  | 4.058977000  | -0.345377000 |
| N  | 4.688015000  | 2.795229000  | -0.334387000 |
| N  | -3.294985000 | -2.822581000 | 0.382015000  |
| N  | -4.676650000 | -2.767100000 | 0.341342000  |
| C  | -5.104982000 | -4.029346000 | 0.365522000  |
| C  | -4.018510000 | -4.922948000 | 0.400272000  |
| C  | -2.890705000 | -4.127990000 | 0.395356000  |
| C  | -4.087791000 | 1.786846000  | -0.273222000 |
| C  | -3.933178000 | 3.178994000  | -0.217240000 |
| C  | -5.051283000 | 4.019204000  | -0.281006000 |
| C  | -6.323600000 | 3.435349000  | -0.391930000 |
| C  | -6.416879000 | 2.057400000  | -0.387988000 |
| N  | -5.350926000 | 1.234170000  | -0.314571000 |
| O  | -5.007502000 | 5.362397000  | -0.235634000 |
| C  | -3.737027000 | 6.032080000  | -0.121869000 |
| C  | -3.969530000 | 7.549629000  | -0.096104000 |
| C  | -2.584838000 | 8.216327000  | 0.021666000  |
| C  | -4.654588000 | 8.001868000  | -1.399631000 |
| C  | -4.835713000 | 7.931043000  | 1.119383000  |
| H  | -6.165649000 | -4.234997000 | 0.343722000  |
| H  | -4.051783000 | -6.001787000 | 0.415727000  |
| H  | -1.850062000 | -4.400959000 | 0.367282000  |
| H  | -2.949271000 | 3.598996000  | -0.081897000 |
| H  | -7.210311000 | 4.055518000  | -0.451015000 |
| H  | -7.385890000 | 1.573484000  | -0.435934000 |
| H  | -3.108791000 | 5.753124000  | -0.977901000 |
| H  | -3.241284000 | 5.704084000  | 0.800769000  |
| H  | -2.068628000 | 7.909812000  | 0.939644000  |
| H  | -2.691736000 | 9.306590000  | 0.045681000  |
| H  | -1.943671000 | 7.961618000  | -0.831053000 |
| H  | -4.045052000 | 7.745669000  | -2.275050000 |
| H  | -4.799279000 | 9.088364000  | -1.397291000 |
| H  | -5.635009000 | 7.529485000  | -1.518178000 |
| H  | -4.356425000 | 7.625299000  | 2.057744000  |
| H  | -5.820292000 | 7.455088000  | 1.069826000  |
| H  | -4.984039000 | 9.016396000  | 1.156074000  |
| Ru | -5.428468000 | -0.847494000 | -0.007686000 |
| C  | -5.669042000 | -0.085596000 | 4.327076000  |
| C  | -5.201692000 | -0.239858000 | 3.026134000  |

|   |               |              |              |
|---|---------------|--------------|--------------|
| N | -6.000732000  | -0.581998000 | 1.996758000  |
| C | -7.337830000  | -0.786119000 | 2.242933000  |
| C | -7.860652000  | -0.645900000 | 3.530311000  |
| C | -7.023384000  | -0.292752000 | 4.585056000  |
| C | -8.158419000  | -1.156875000 | 1.071588000  |
| N | -7.445965000  | -1.223770000 | -0.075299000 |
| C | -8.007151000  | -1.553885000 | -1.260036000 |
| C | -9.374281000  | -1.836633000 | -1.327950000 |
| C | -10.130850000 | -1.770876000 | -0.156145000 |
| C | -9.528851000  | -1.430353000 | 1.056925000  |
| C | -7.038137000  | -1.569600000 | -2.375244000 |
| N | -5.739121000  | -1.264017000 | -2.044368000 |
| C | -4.811410000  | -1.255601000 | -3.021300000 |
| C | -5.108380000  | -1.546411000 | -4.348693000 |
| C | -6.422629000  | -1.860642000 | -4.691338000 |
| C | -7.392006000  | -1.869986000 | -3.692266000 |
| H | -4.157112000  | -0.089990000 | 2.781420000  |
| H | -4.976794000  | 0.191040000  | 5.114507000  |
| H | -7.423292000  | -0.182336000 | 5.587516000  |
| H | -8.917033000  | -0.812024000 | 3.705359000  |
| H | -10.120229000 | -1.383004000 | 1.963597000  |
| H | -11.193344000 | -1.986992000 | -0.188160000 |
| H | -9.846265000  | -2.103054000 | -2.266265000 |
| H | -8.420998000  | -2.108400000 | -3.934086000 |
| H | -6.691347000  | -2.093113000 | -5.716464000 |
| H | -4.317852000  | -1.524240000 | -5.090574000 |
| H | -3.804311000  | -1.004750000 | -2.711004000 |
| H | 4.068071000   | 6.029910000  | -0.348247000 |
| H | 1.865062000   | 4.430521000  | -0.283692000 |
| H | 6.179469000   | 4.263959000  | -0.340360000 |
